# Supplementary material for: European farmhouse brewing yeasts form a distinct genetic group
Source: Springer Nature journal article supplement (doi:10.1007/s00253-024-13267-3), 2024-08-02

## Supplementary Material

**Journal:** Applied Microbiology and Biotechnology

### European Farmhouse Brewing Yeasts Form a Distinct Genetic Group

Richard Preiss<sup>1</sup>, Eugene Fletcher<sup>1,a</sup>, Lars Marius Garshol<sup>2</sup>, Barret Foster<sup>3</sup>, Emine Ozsahin<sup>3</sup>, Mark Lubberts<sup>3</sup>, George van der Merwe<sup>3</sup>, Kristoffer Krogerus<sup>4\*</sup>

<sup>1</sup> Escarpment Laboratories, Guelph, ON, Canada

<sup>2</sup> Independent researcher, Rælingen, Norway

<sup>3</sup> Department of Molecular and Cellular Biology, University of Guelph, Guelph, ON, Canada

<sup>4</sup> VTT Technical Research Centre of Finland, Tekniikantie 21, 02150, Espoo, Finland

<sup>a</sup> Current affiliation: Carleton University, Canada

\* Address correspondence to Kristoffer Krogerus, [kristoffer.krogerus@vtt.fi](mailto:kristoffer.krogerus@vtt.fi)

## Supplementary Figure and Table legends

**Supplementary Figure S1.** Visualisation of phased haplotigs detected by nPhase in the 17 phased strains.

**Supplementary Figure S2.** Median coverage in 10 kbp windows across the genome of the 105 *S. cerevisiae* strains included in the genomic analysis.

**Supplementary Figure S3.** Allele frequency distributions across the genome of the 105 *S. cerevisiae* strains included in the genomic analysis.

**Supplementary Figure S4.** A neighbour-joining tree generated based on MinHash distances in the (A) assemblies of 1,011 yeast genomes (Peter et al. 2018), and (B) 142 assemblies of ScRAP (O'Donnell et al. 2023), together with long-read assemblies of 9 landrace and 6 control strains generated here. The branches containing the 'Mixed origin', 'European farmhouse' and 'Beer 1'/Ale beer' populations are highlighted.

**Supplementary Figure S5.** (A) Maximum likelihood phylogenetic tree based on SNPs at 310688 sites in 1,011 yeast genome strains (Peter et al. 2018), the 35 landrace and five brewing control strains sequenced here, and the five sequenced NCYC 'kveik' strains. (B) A neighbour-joining tree based on SNPs at 1652813 biallelic sites in 1,011 yeast genome strains (Peter et al. 2018), the 35 landrace and five brewing control strains sequenced here, and the five sequenced NCYC 'kveik' strains. The branches containing the 'Mixed origin', 'European farmhouse' and 'Beer 1'/Ale beer' populations are highlighted.

**Supplementary Figure S6.** Population structure of a merged set of 35 *S. cerevisiae* landrace brewing strains and the 1,011 yeast genomes strains estimated with ADMIXTURE based on SNPs at 31766 sites. Each strain along the x-axis is represented by a vertical bar partitioned into colors based on estimated membership fractions to the resolved populations for  $K = 8$  to 20 assumed ancestral populations.

**Supplementary Figure S7.** Heatmaps visualising  $D$ ,  $f_4$ -ratio and  $f$ -branch statistics between populations as calculated with DSuite. (A) The  $f$ -branch statistics between population tree tips and nodes. A warmer colour represents a higher estimated  $f$ -branch value, which indicates the proportion of the genome affected by admixture. Grey shading indicates tests that could not be made. The maximum (B)  $D$  and (C)  $f_4$ -ratio statistics between pairs of populations. A red color indicates a higher value, while a blue color a lower value.

**Supplementary Figure S8.** The network graph topology with highest posterior probability as derived by AdmixtureBayes from the merged data set of 1,011 yeast genome strains (Peter et al. 2018), the 35 landrace and five brewing control strains sequenced here, and the five sequenced NCYC ‘kveik’ strains. The data set converged to and was best described by 20 admixture events. Red squares indicate admixture events, while blue ovals indicate populations.

**Supplementary Figure S9.** Change in specific gravity over time in the wort fermentations with landrace and control brewing strains. Error bars show standard deviation of three replicates.

**Supplementary Figure S10.** Concentration of isoamyl, isobutyl and phenylethyl acetate in the beers fermented with landrace and control brewing strains. Error bars show standard deviation of three replicates. Different letters above bars indicate significant differences by one-way ANOVA ( $p < 0.05$ ).

**Supplementary Figure S11.** Relative total ester formation by group among the landrace and control brewing strains during wort fermentations. Different letters above bars indicate significant differences by one-way ANOVA ( $p < 0.05$ ).

**Supplementary Figure S12.** Average copy number of genes related to maltose and maltotriose transport and metabolism among the landrace strains sequenced here and the 1,011 yeast genome strains (Peter et al. 2018) grouped by population.

**Supplementary Figure S13.** Copy number of *RTMI* among the 1,011 yeast genomes strains (Peter et al. 2018) grouped by population.

**Supplementary Figure S14.** The *RTMI* cluster in the long-read assemblies of the landrace and control brewing strains. *RTMI* is highlighted in red, while *SUC2* is highlighted in blue.

**Supplementary Table S1.** A list of strains included in the genomic analysis, the number of homozygous and heterozygous SNPs detected, and their accession numbers.

**Supplementary Table S2.** Assembly statistics for the 15 long-read assemblies generated here.

# Supplementary Figure S1

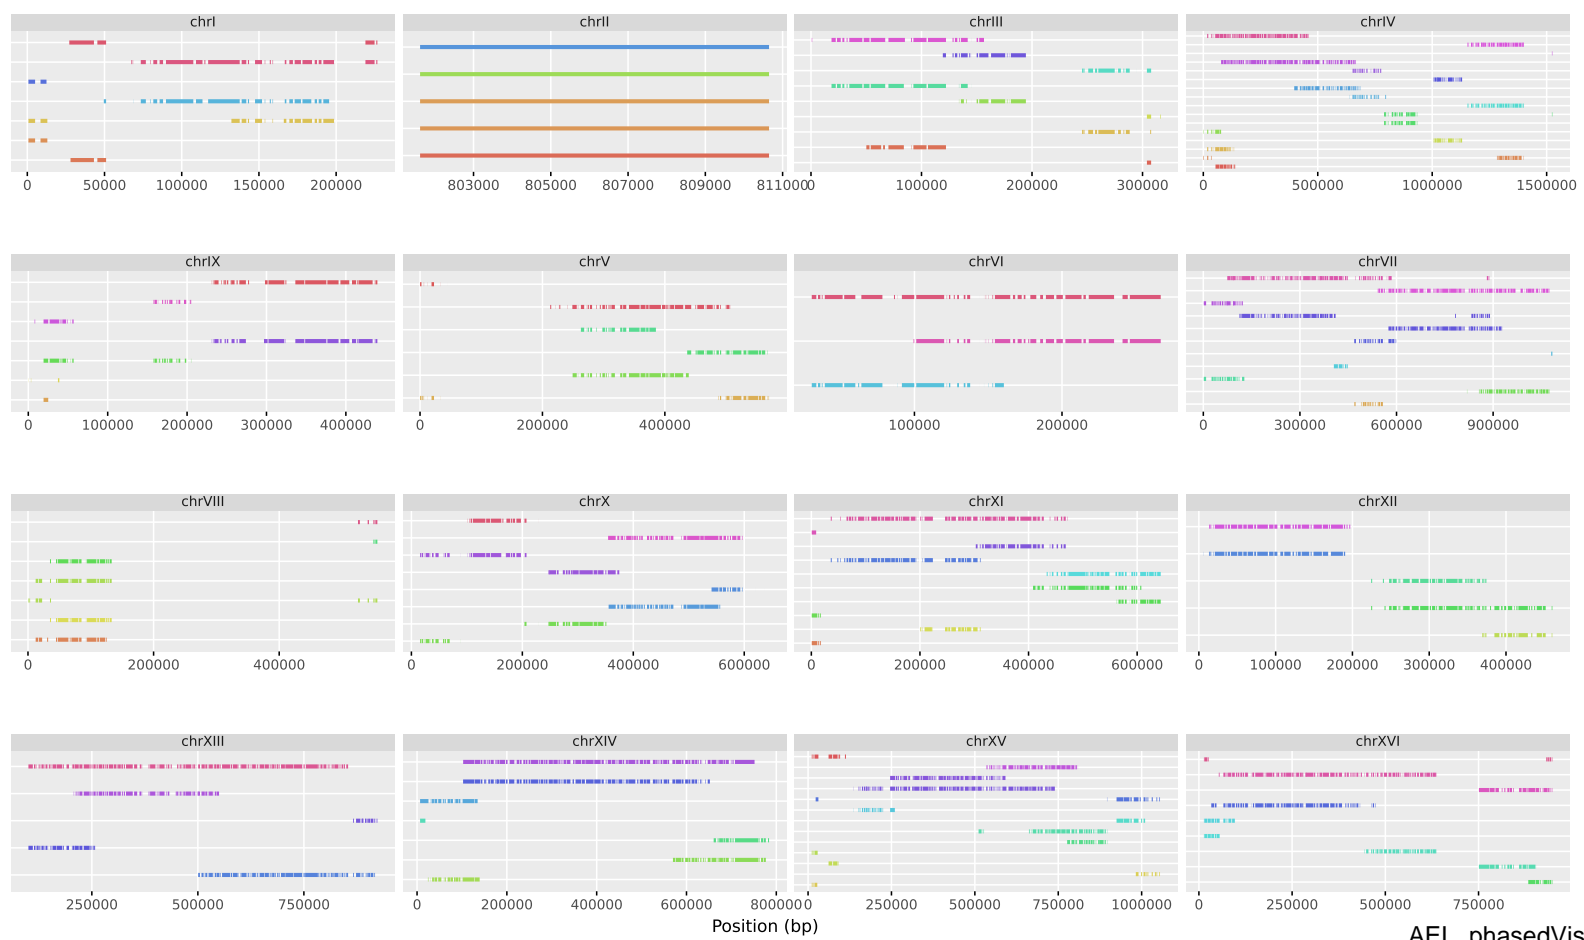

AEL\_phasedVis

# Supplementary Figure S1

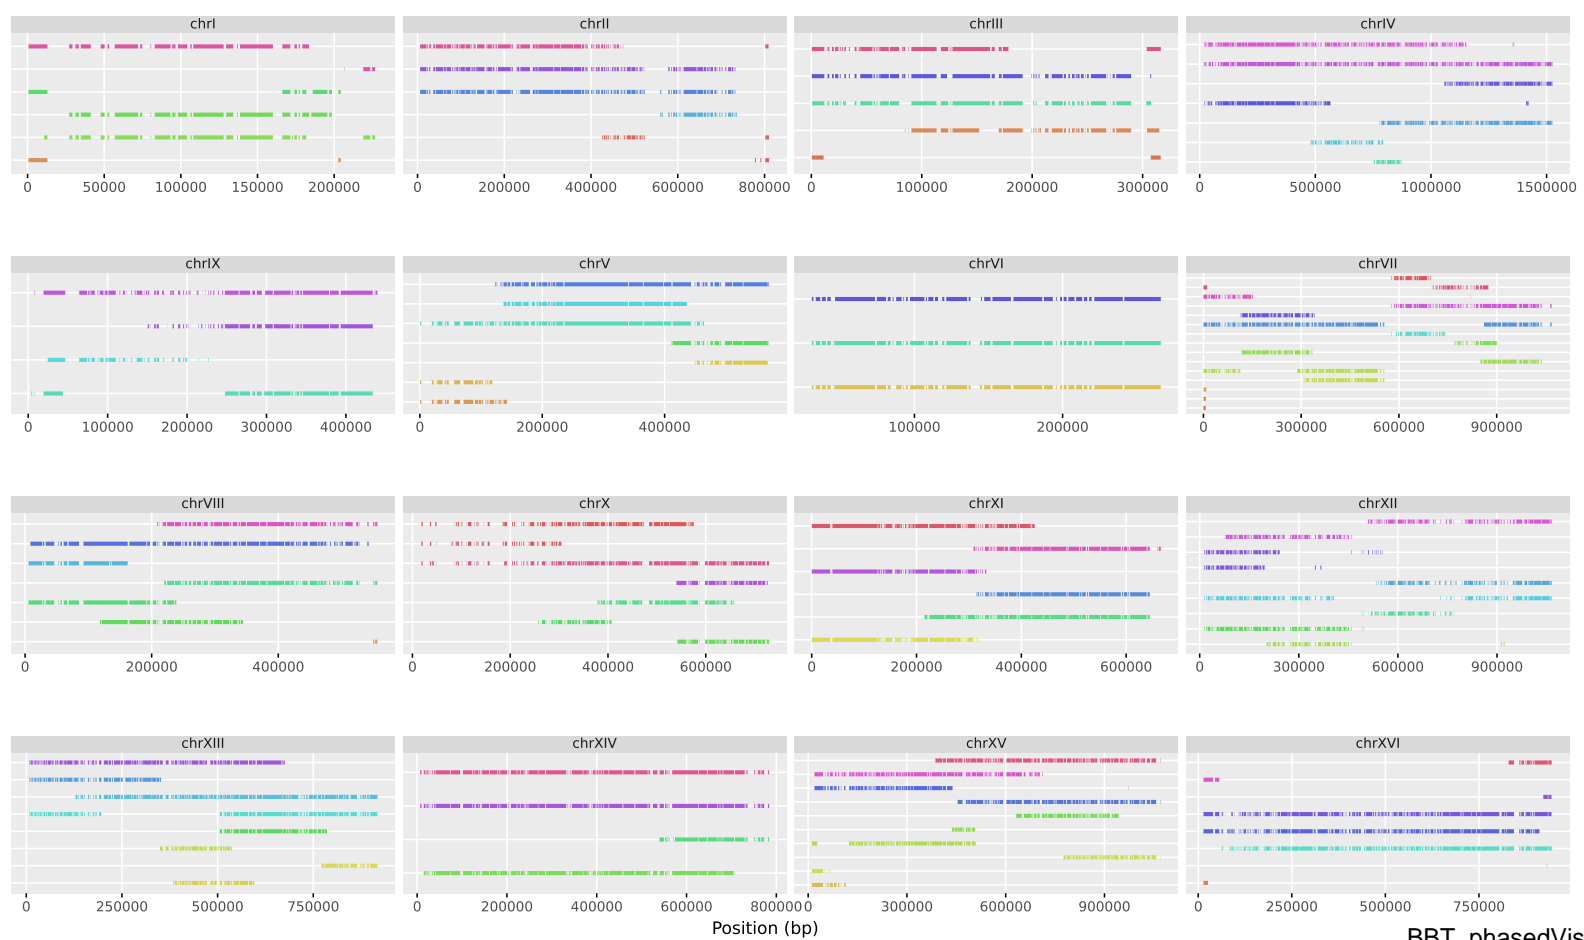

BBT\_phasedVis

# Supplementary Figure S1

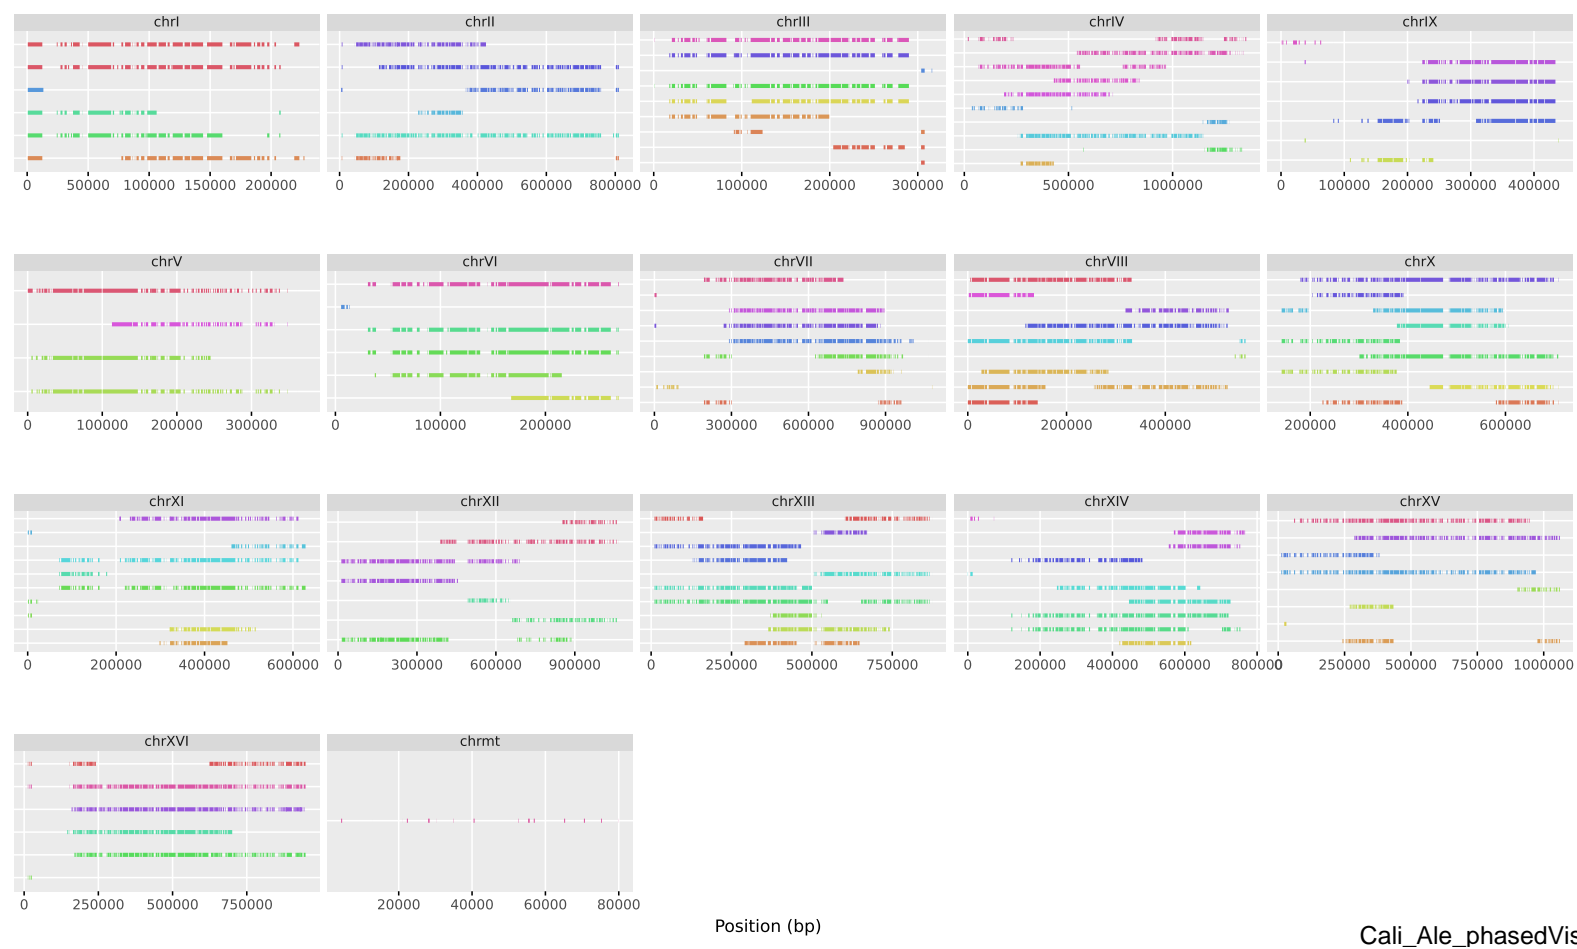

# Supplementary Figure S1

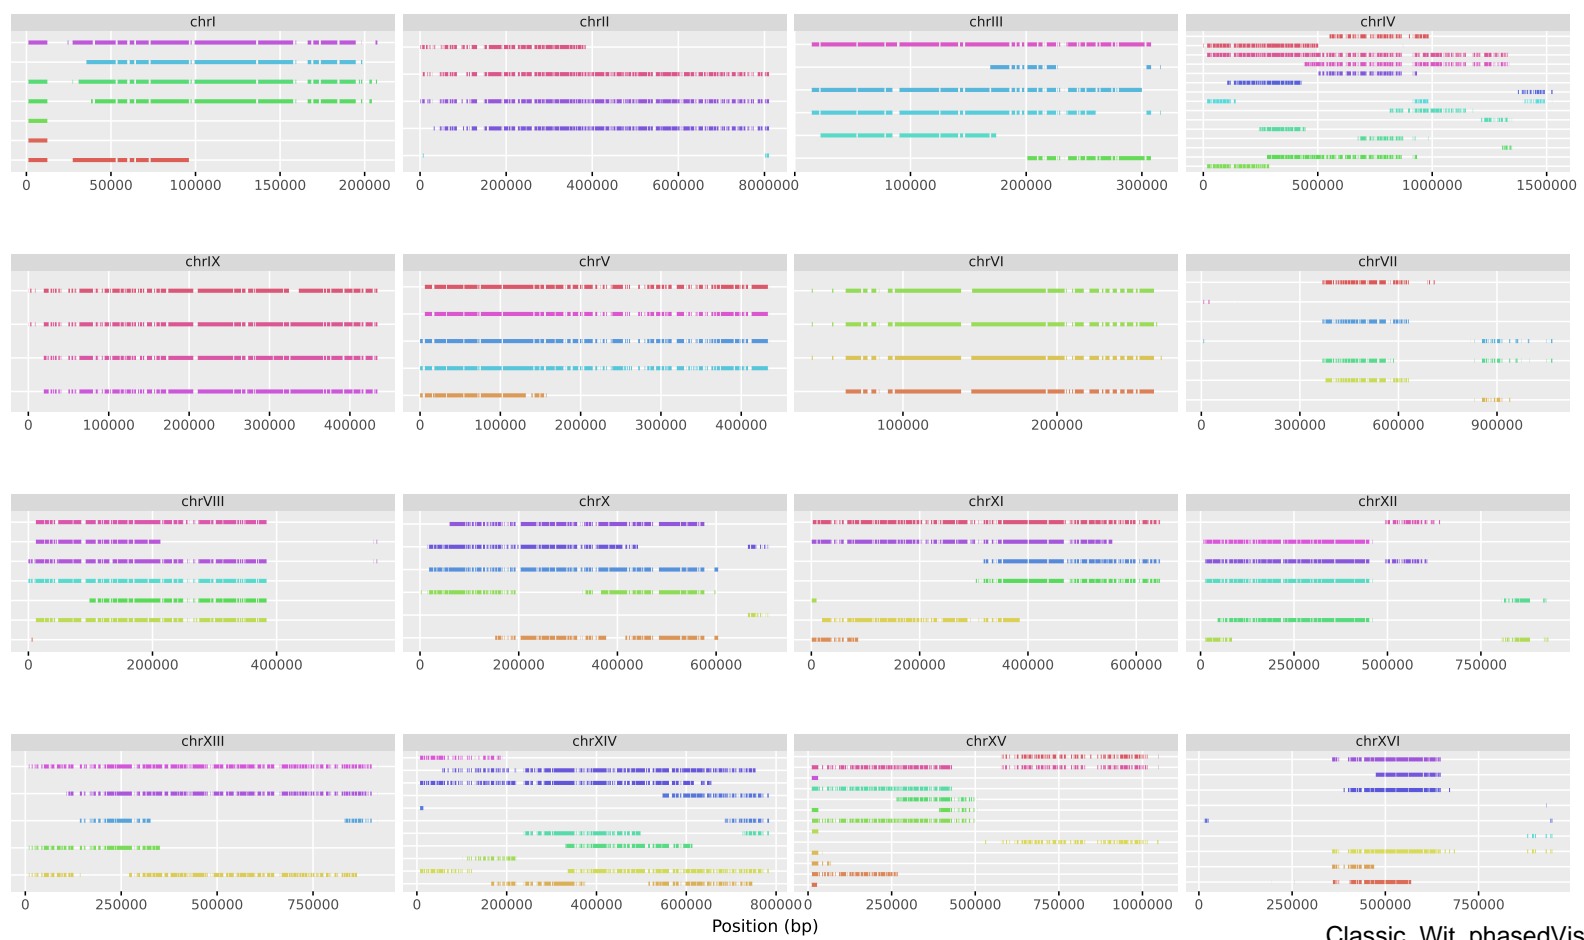

Classic\_Wit\_phasedVis

# Supplementary Figure S1

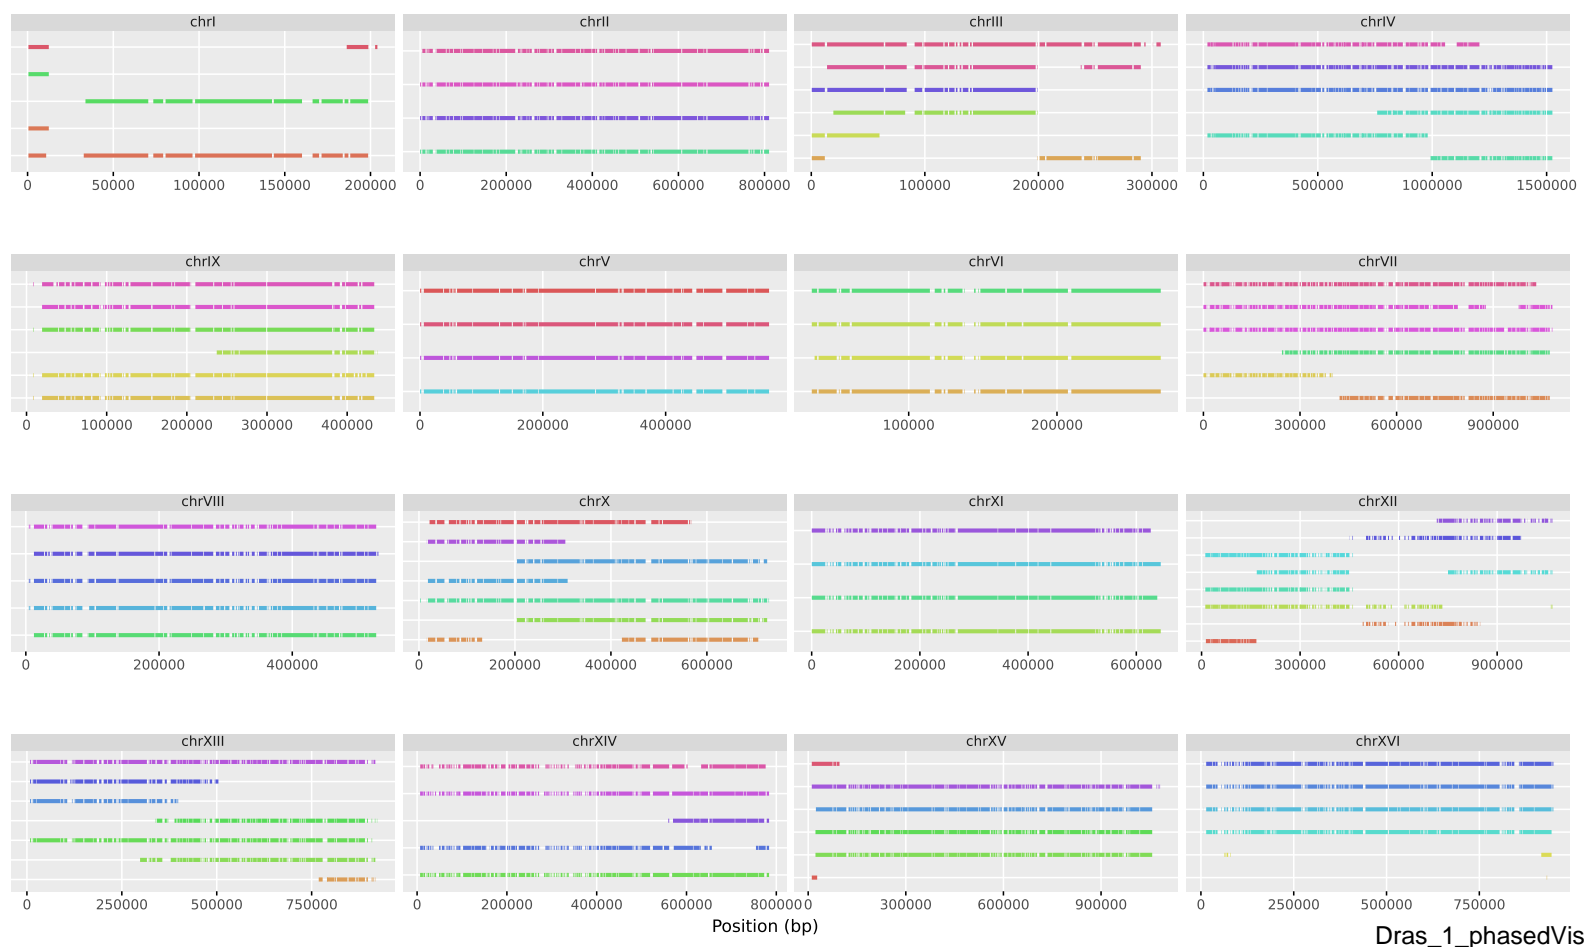



# Supplementary Figure S1

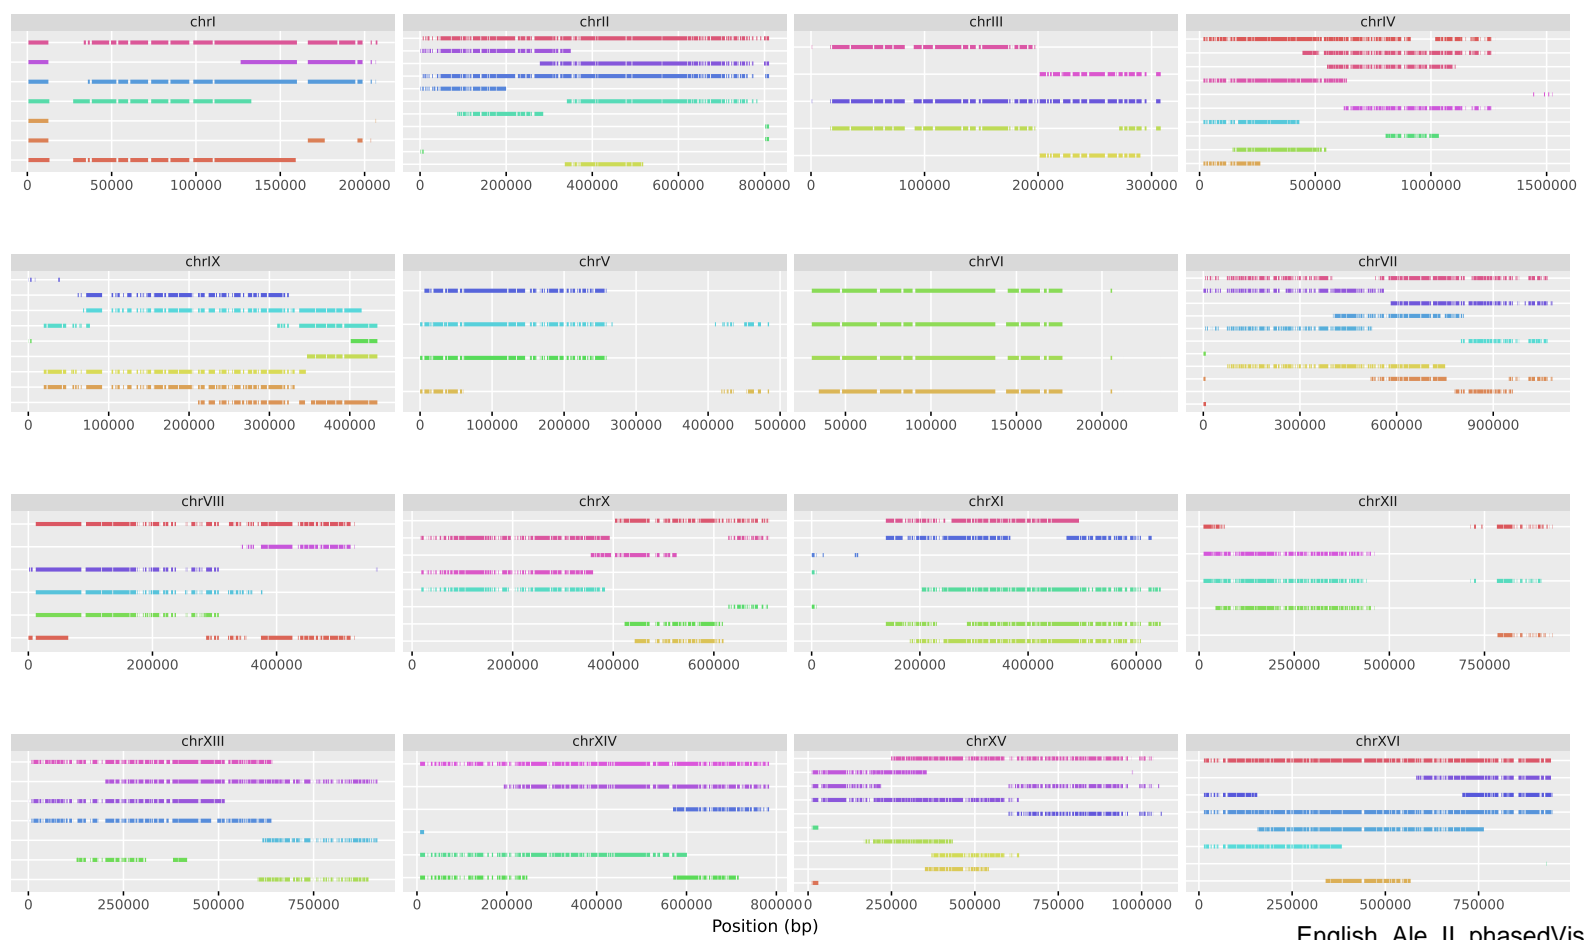

English\_Ale\_II\_phasedVis

# Supplementary Figure S1

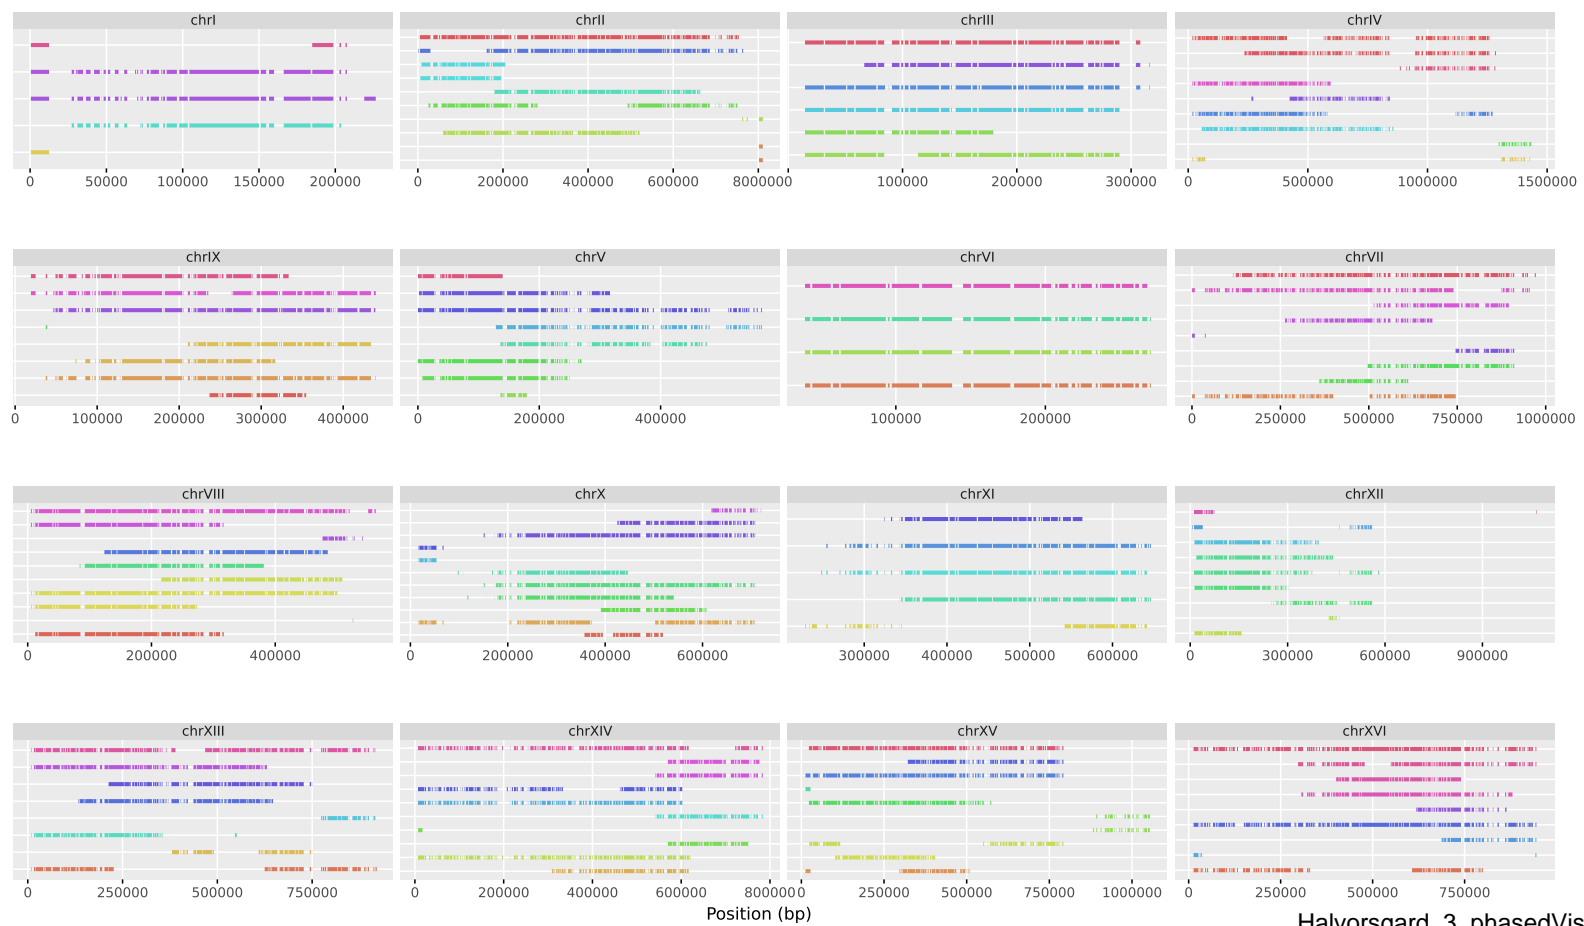

# Supplementary Figure S1

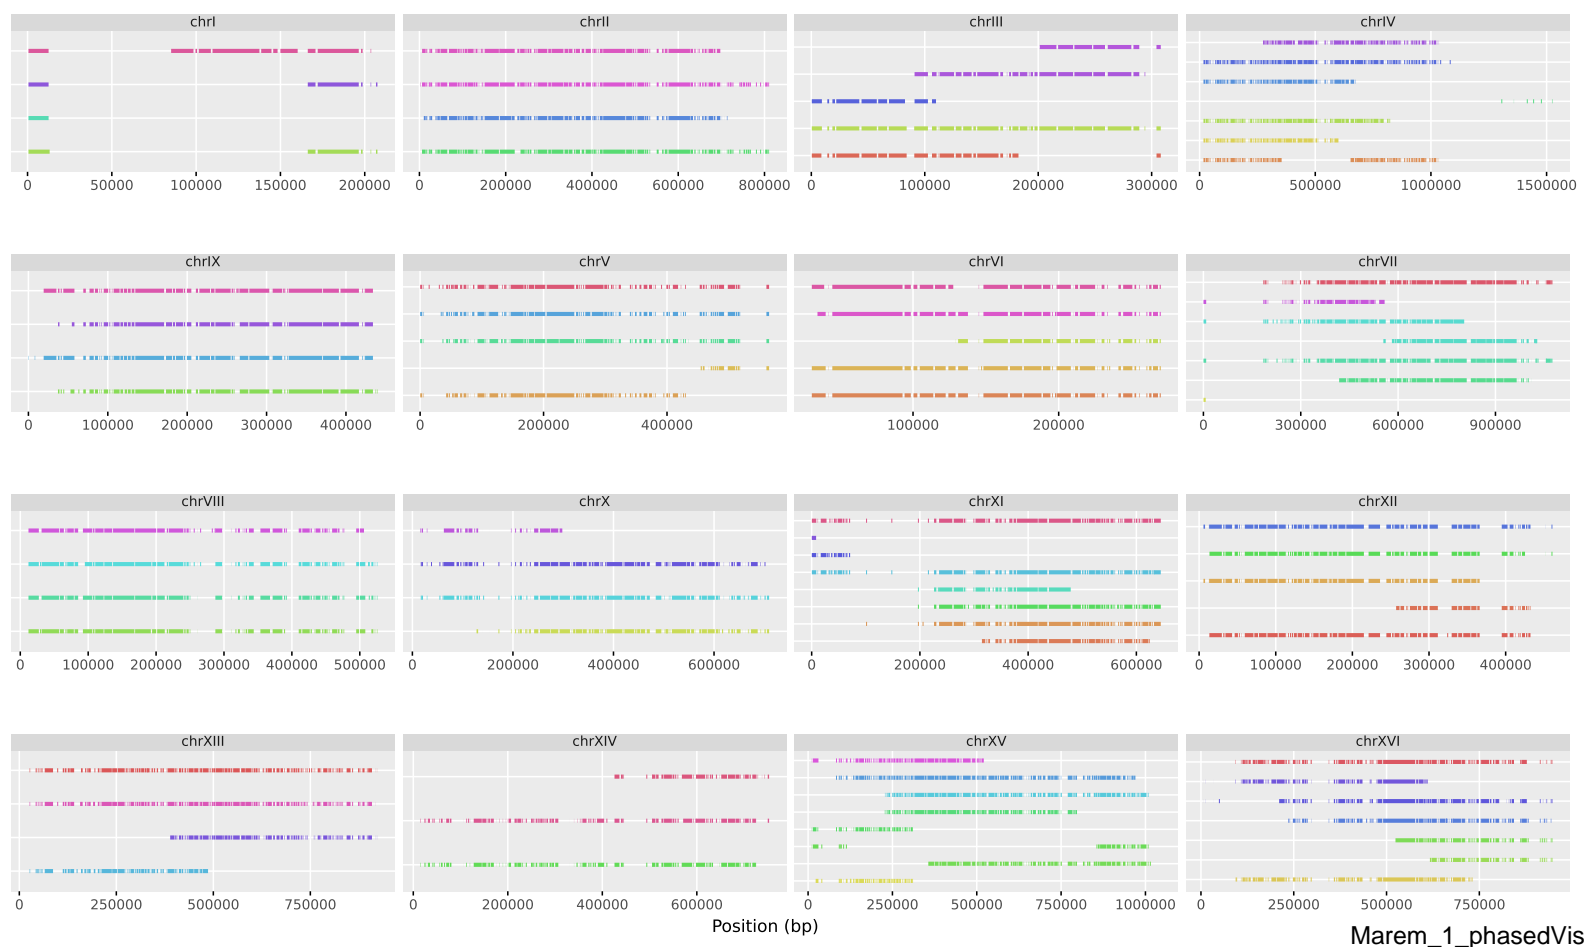

# Supplementary Figure S1

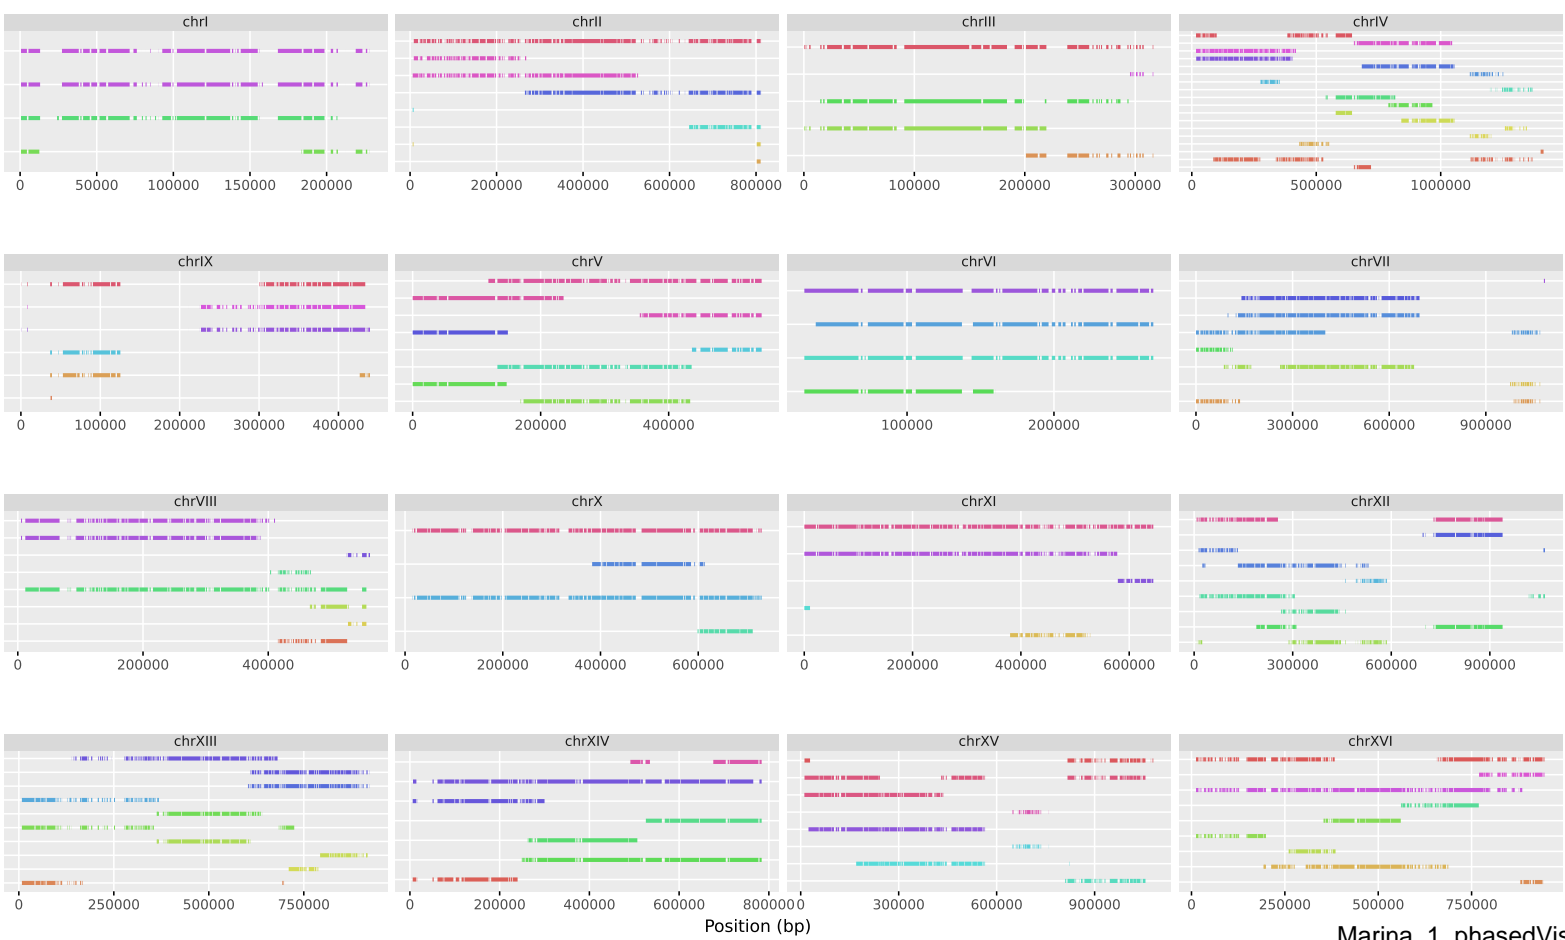

Marina\_1\_phasedVis

# Supplementary Figure S1

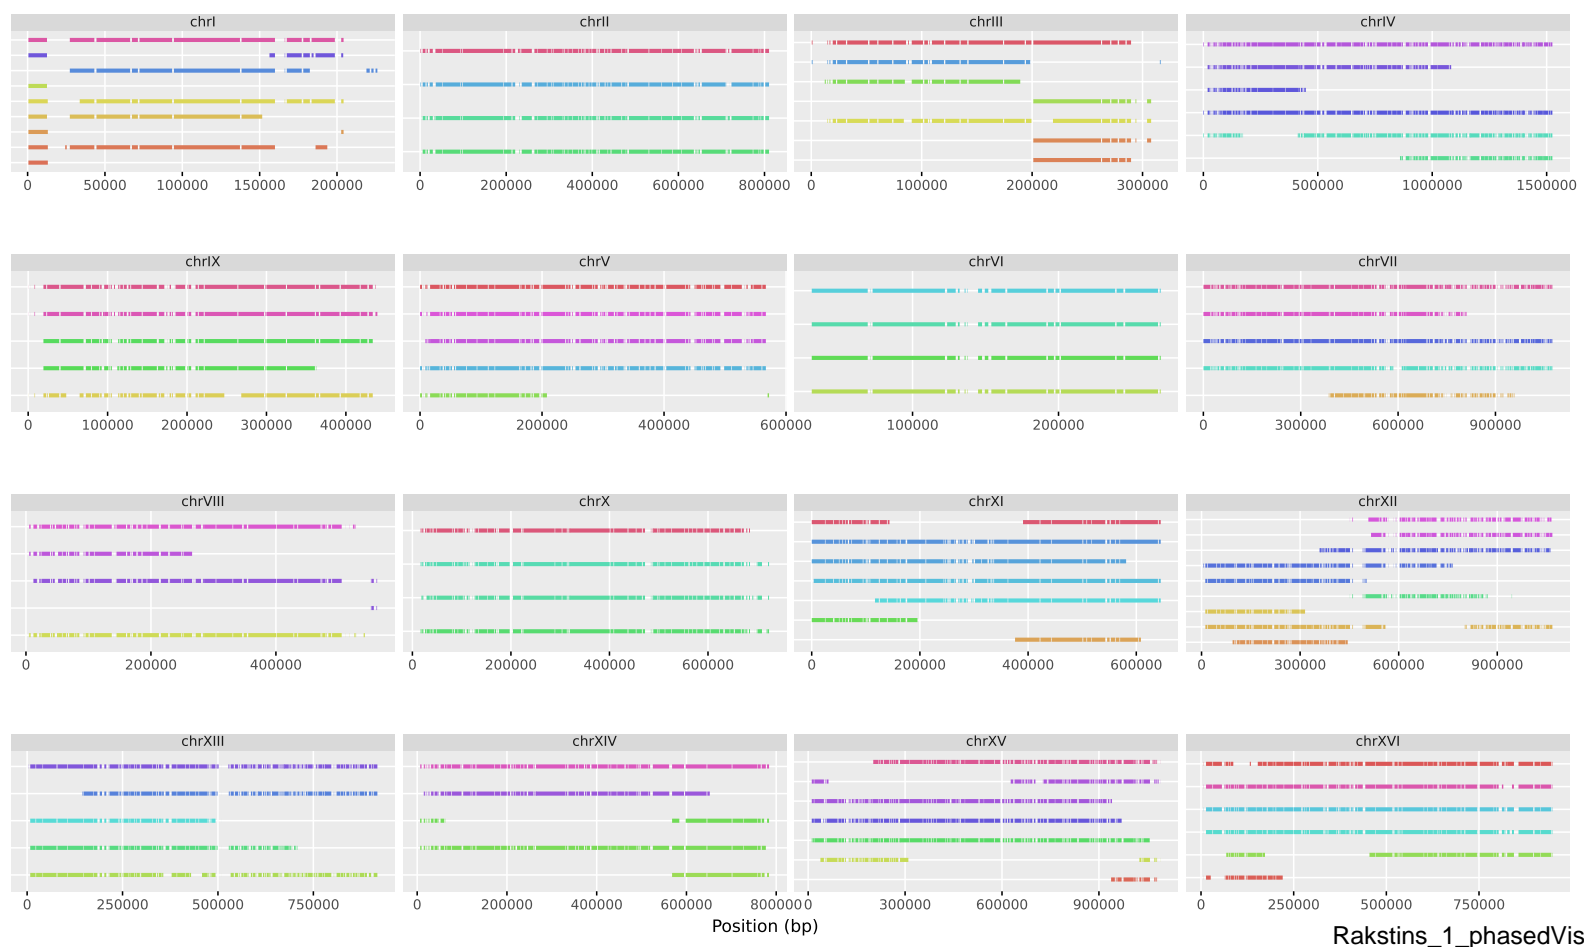

# Supplementary Figure S1

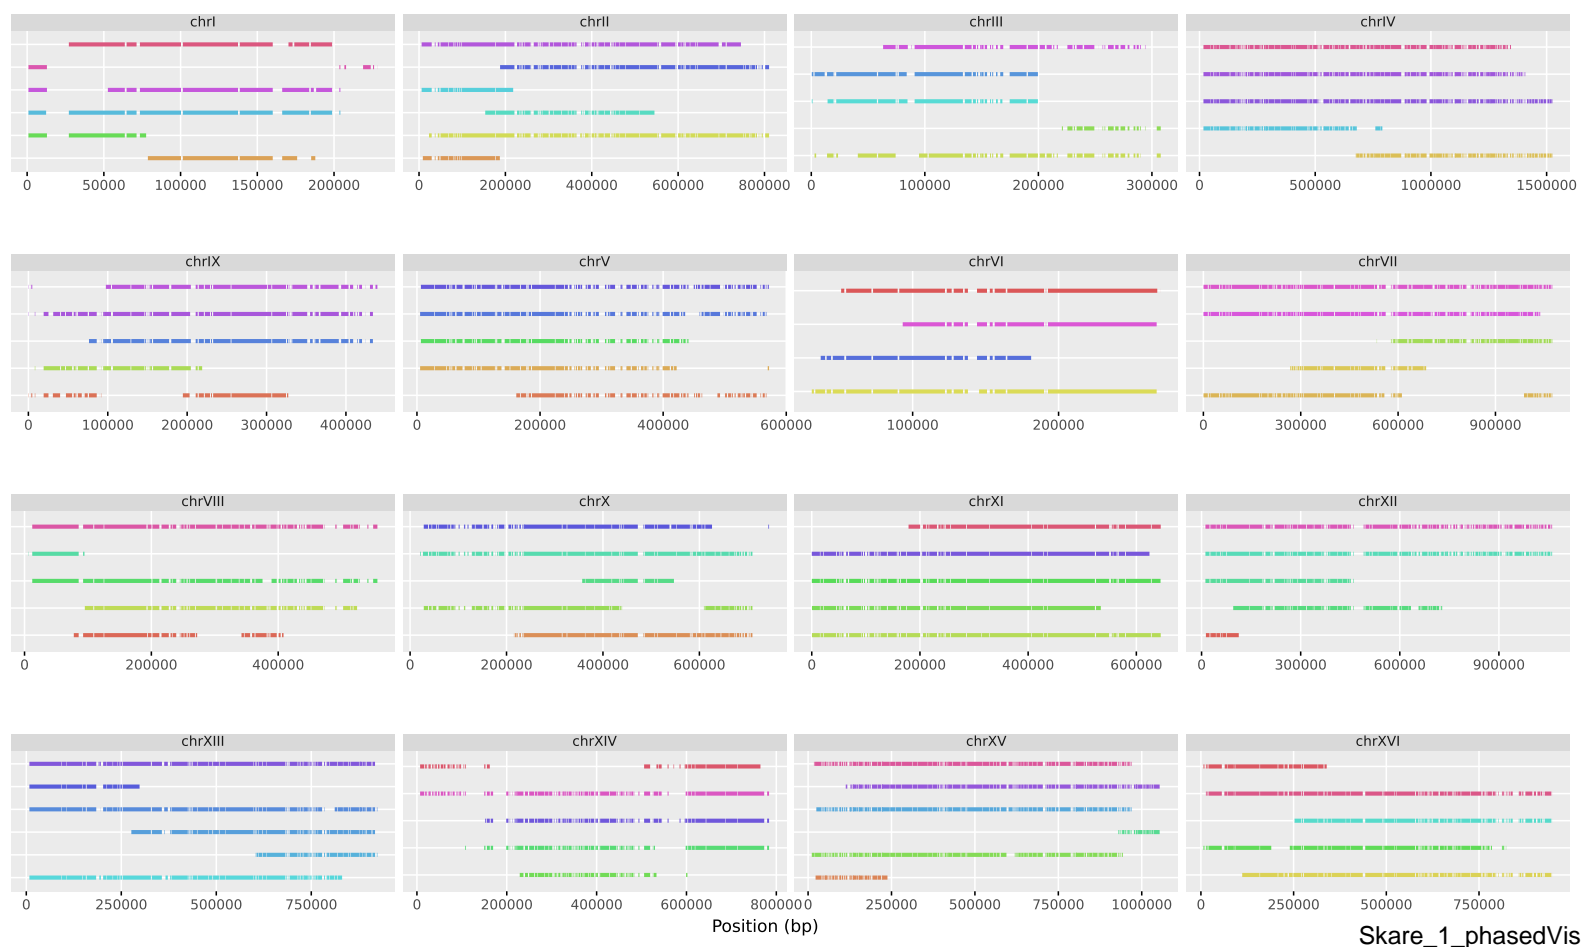

# Supplementary Figure S1

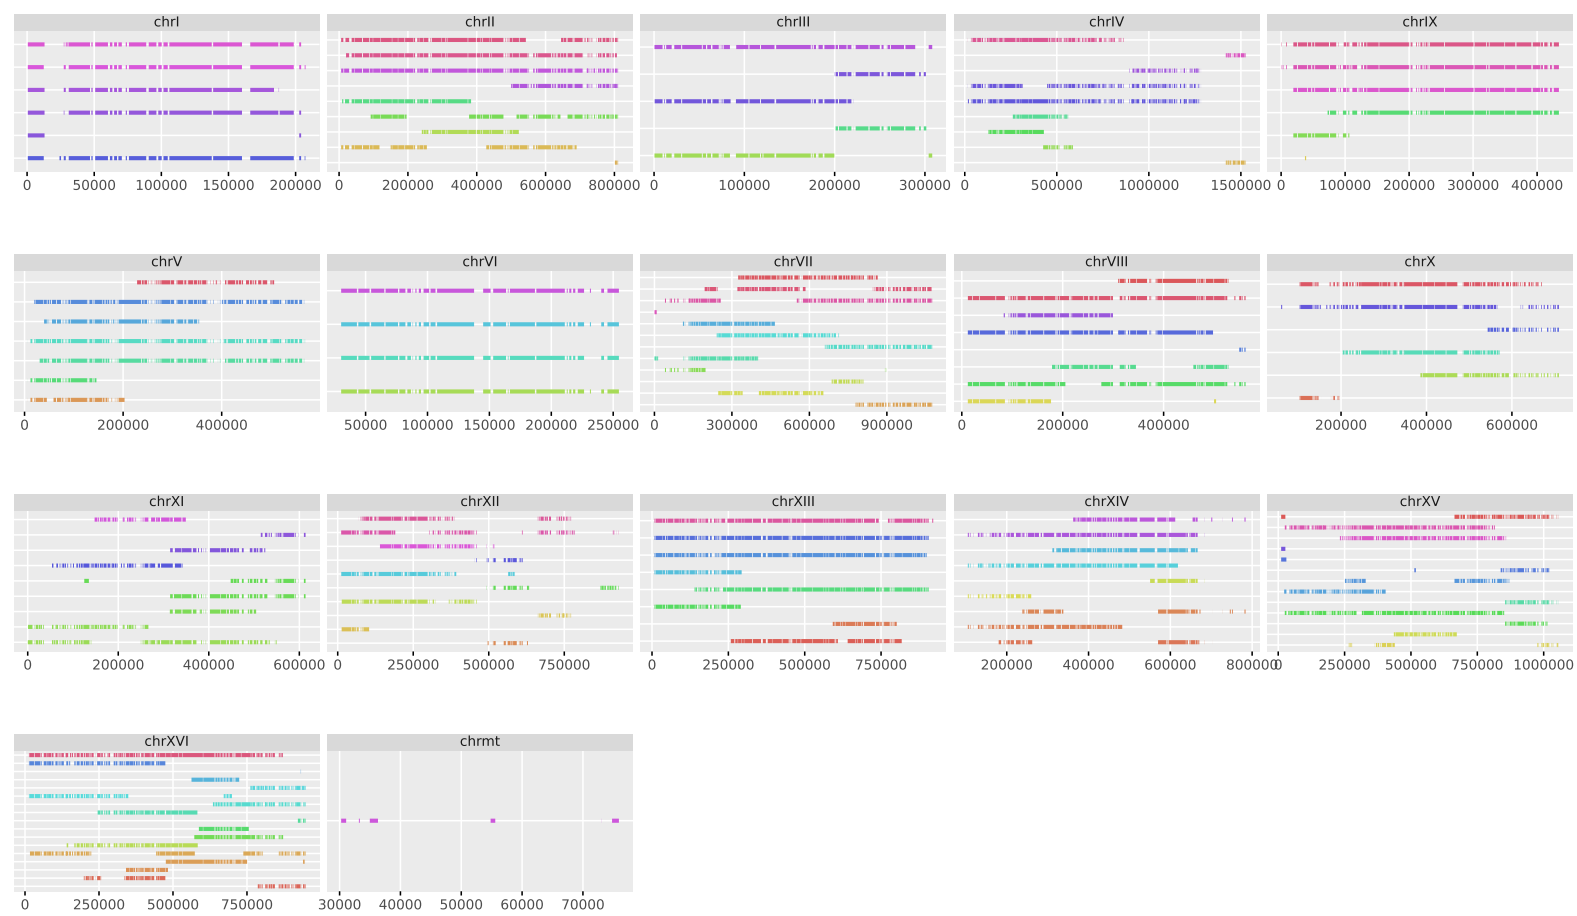

Position (bp)

Stordal\_Ebbegarden\_1\_phasedVis

# Supplementary Figure S1

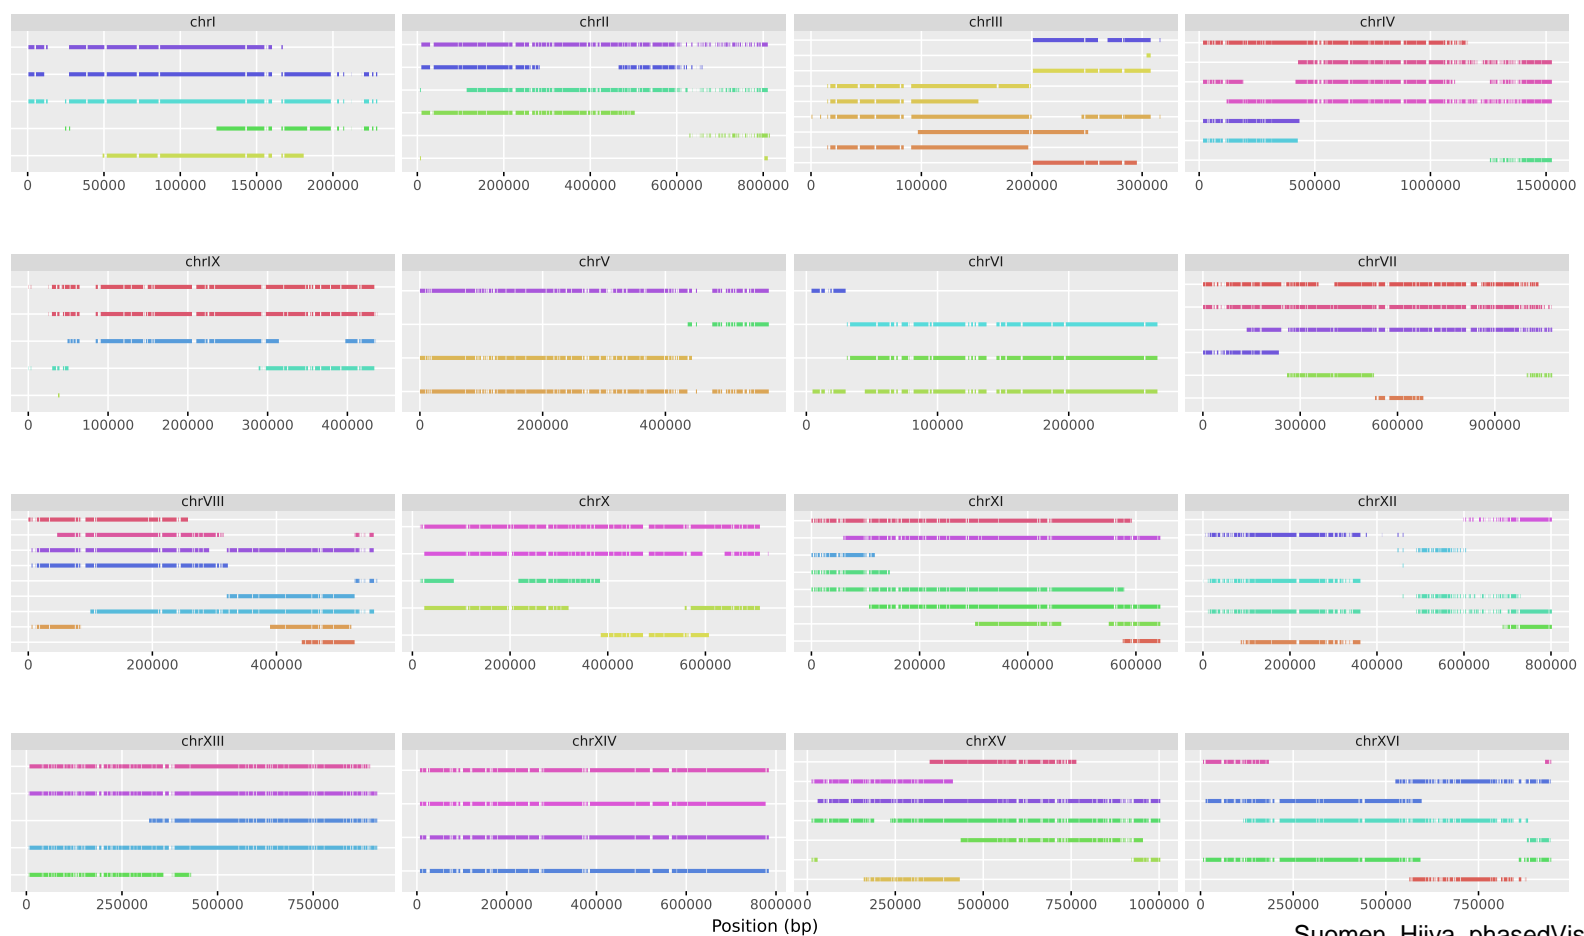

Suomen\_Hiiva\_phasedVis



# Supplementary Figure S1

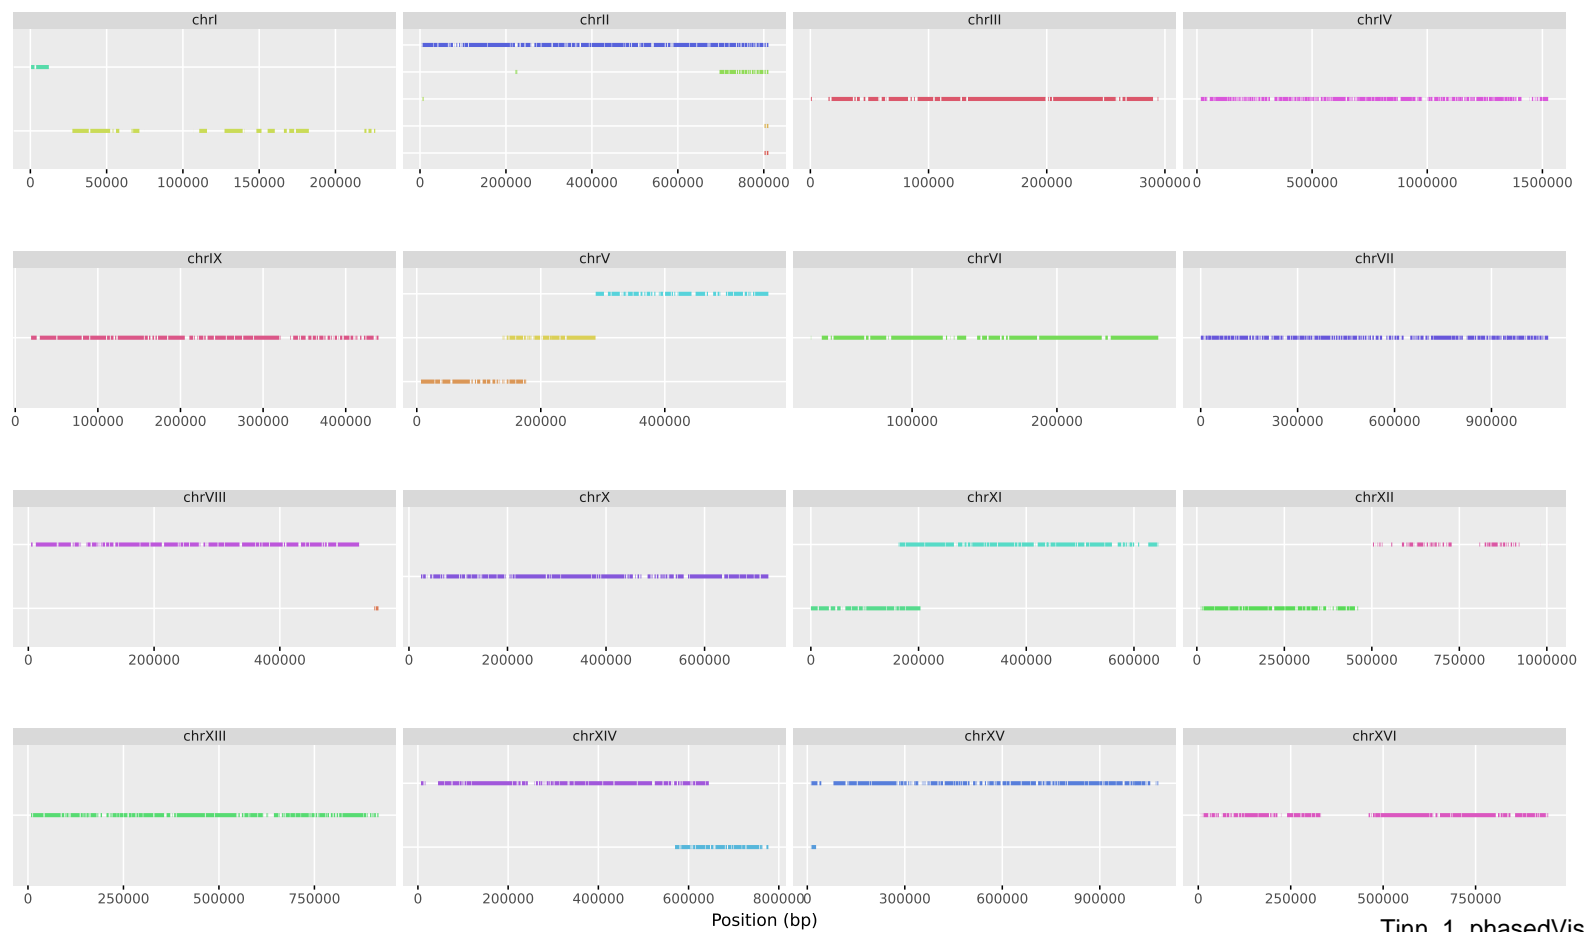

Tinn\_1\_phasedVis

# Supplementary Figure S1

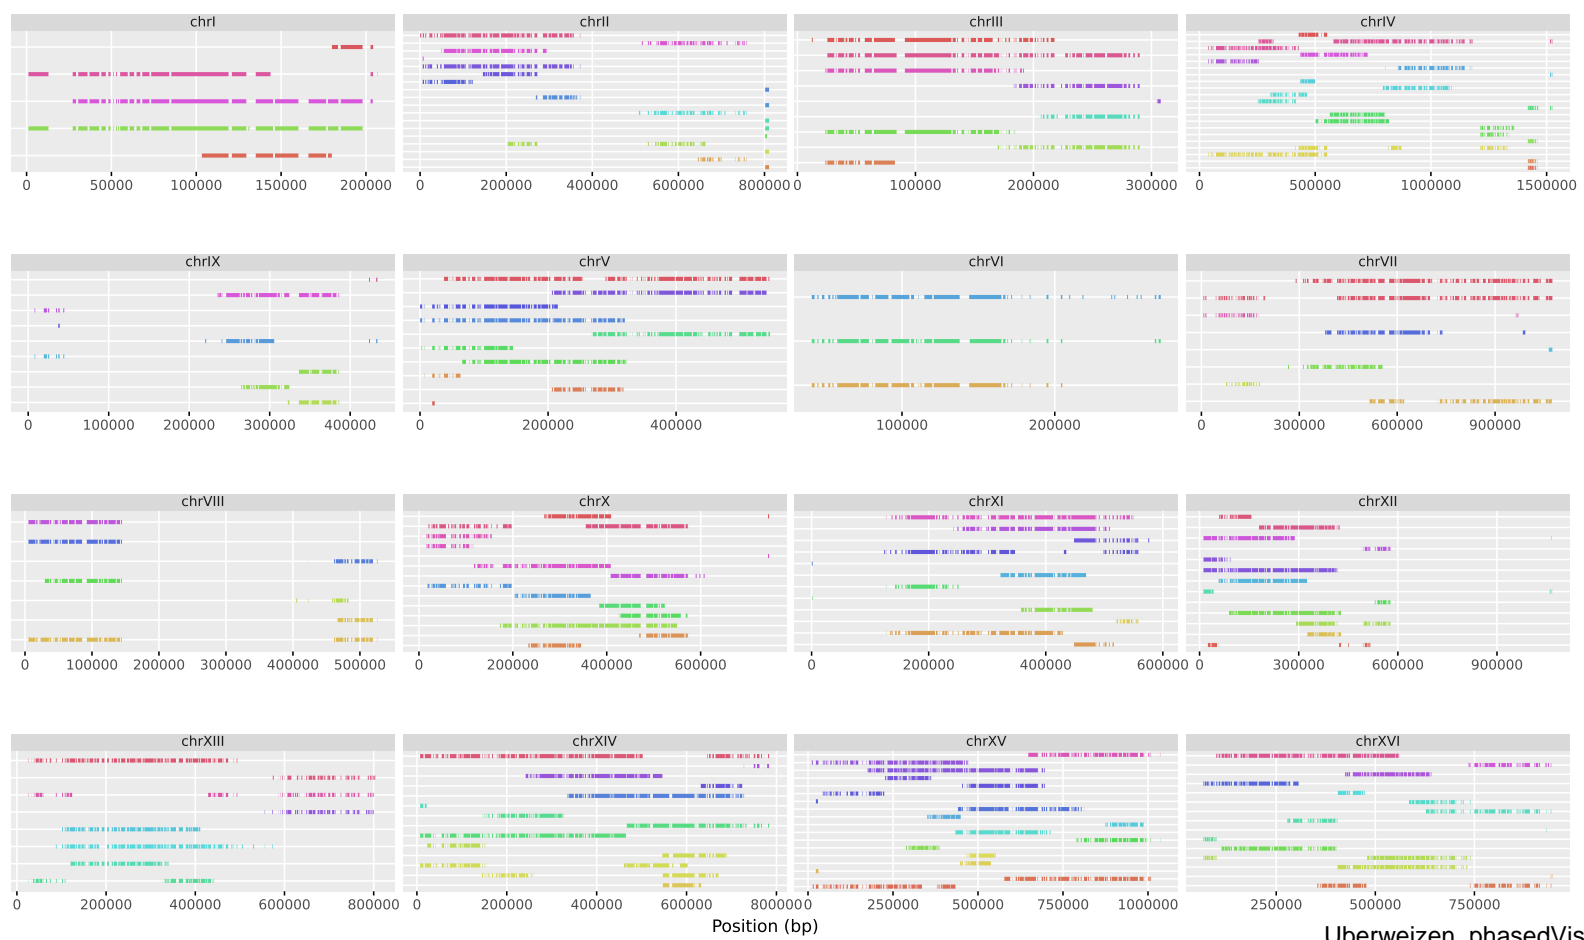

Überweizen\_phasedVis

# Supplementary Figure S1

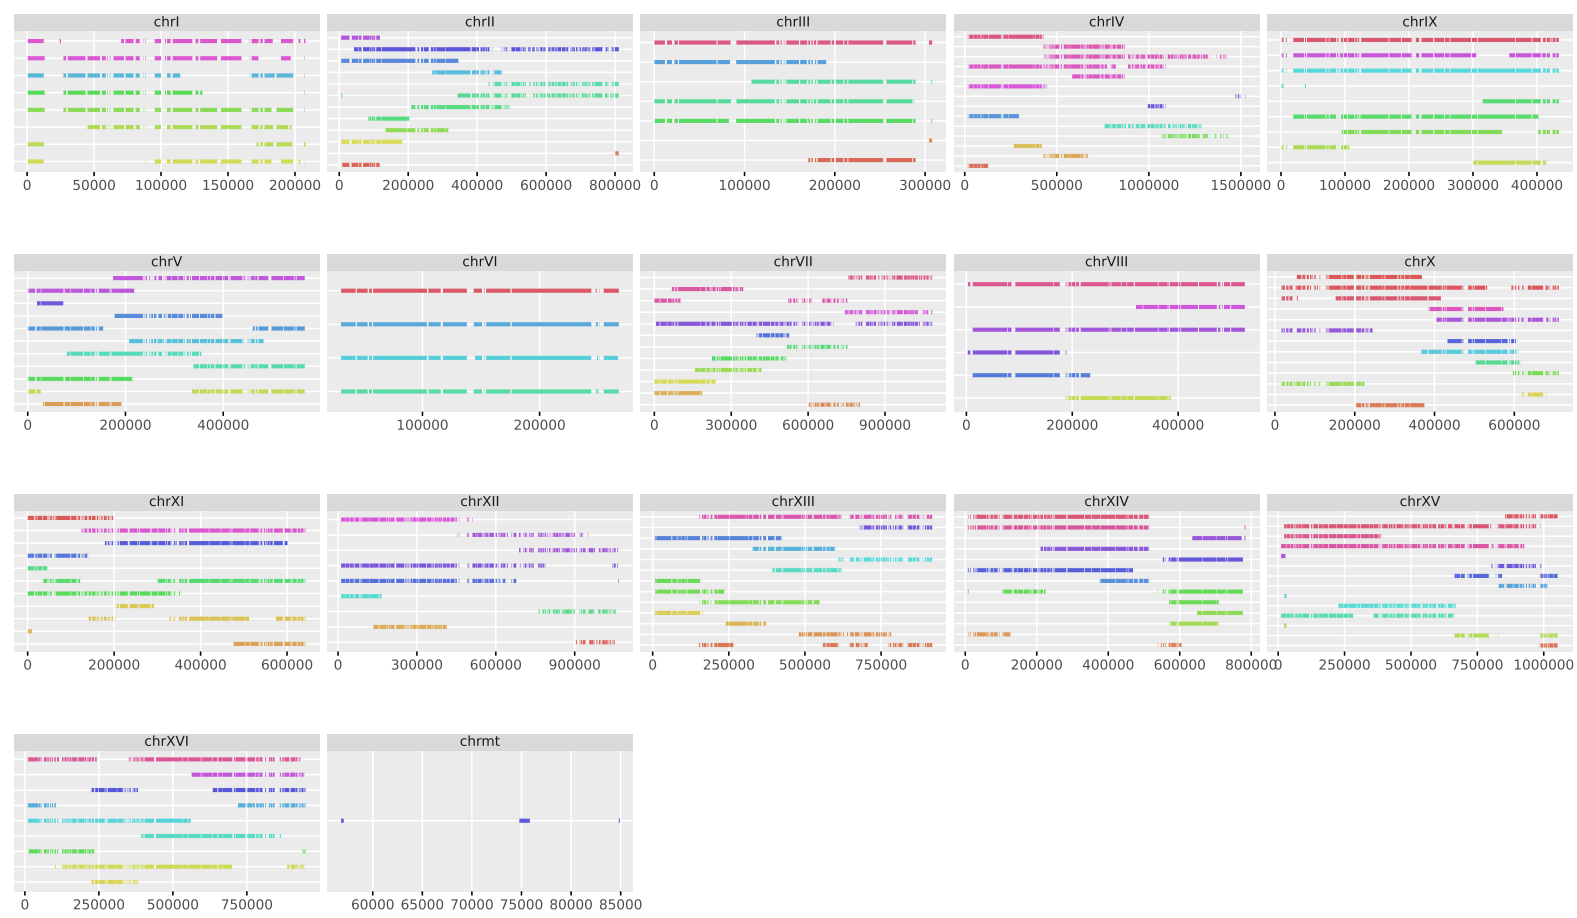

Voss\_1\_phasedVis

# Supplementary Figure S1

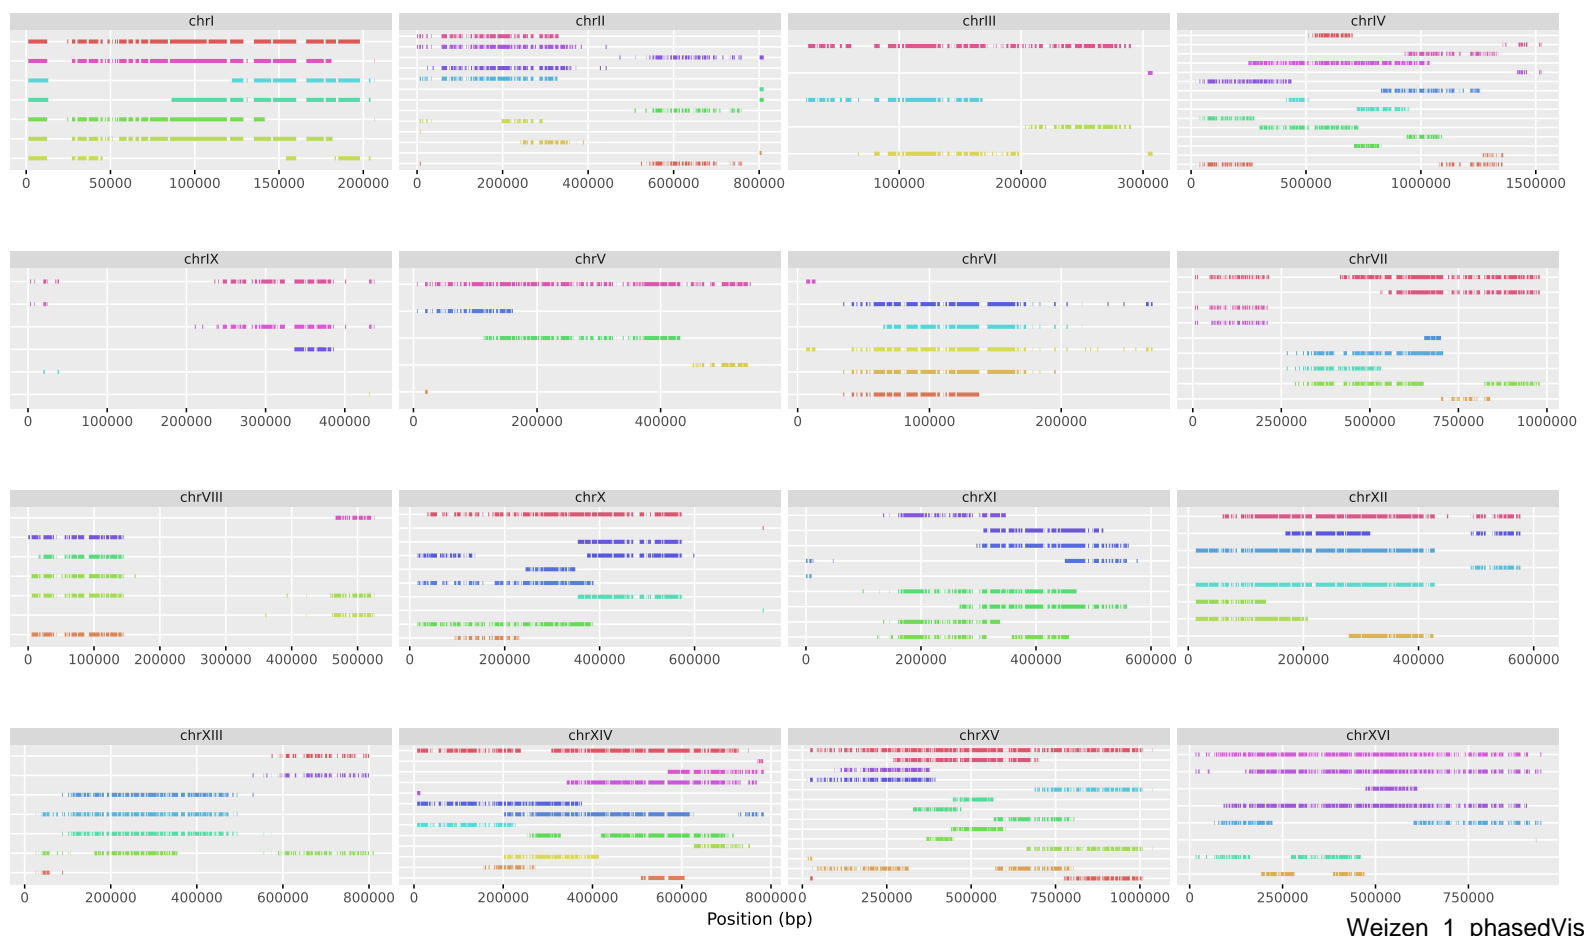

# Supplementary Figure S2

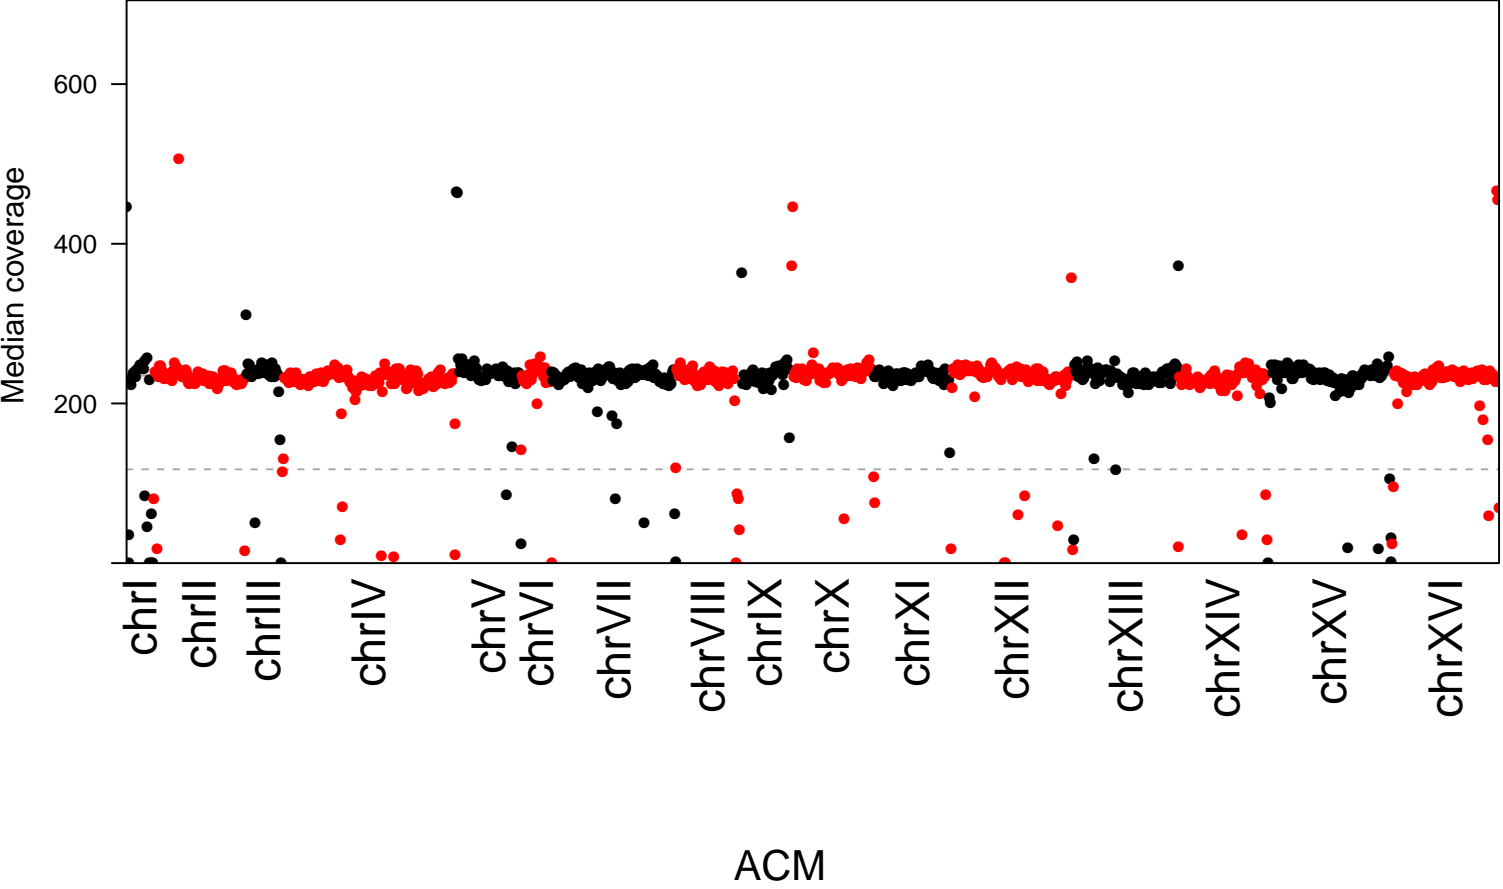

# Supplementary Figure S2

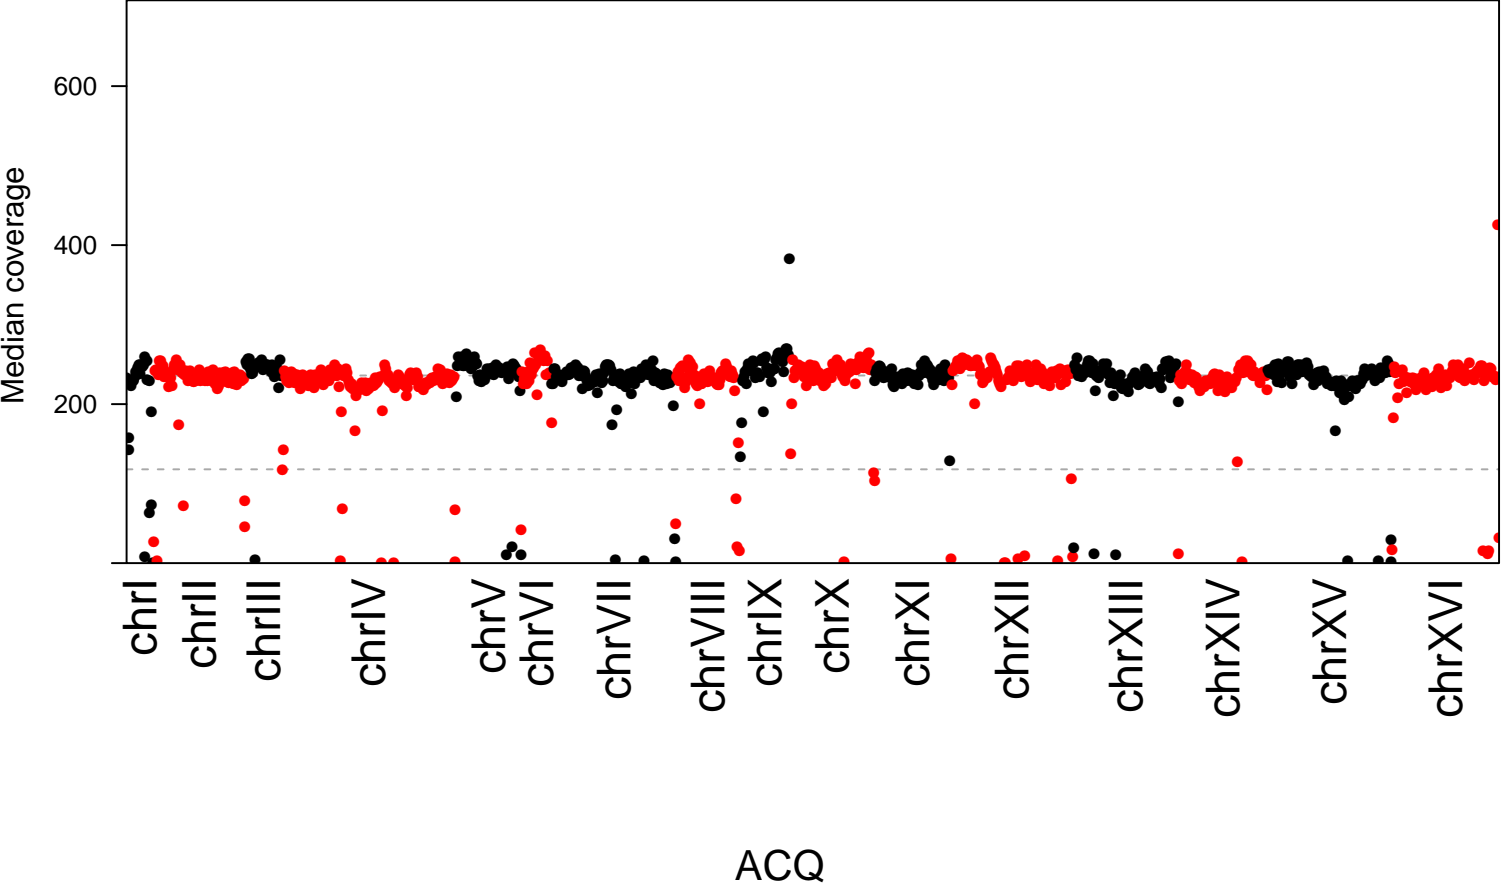

# Supplementary Figure S2

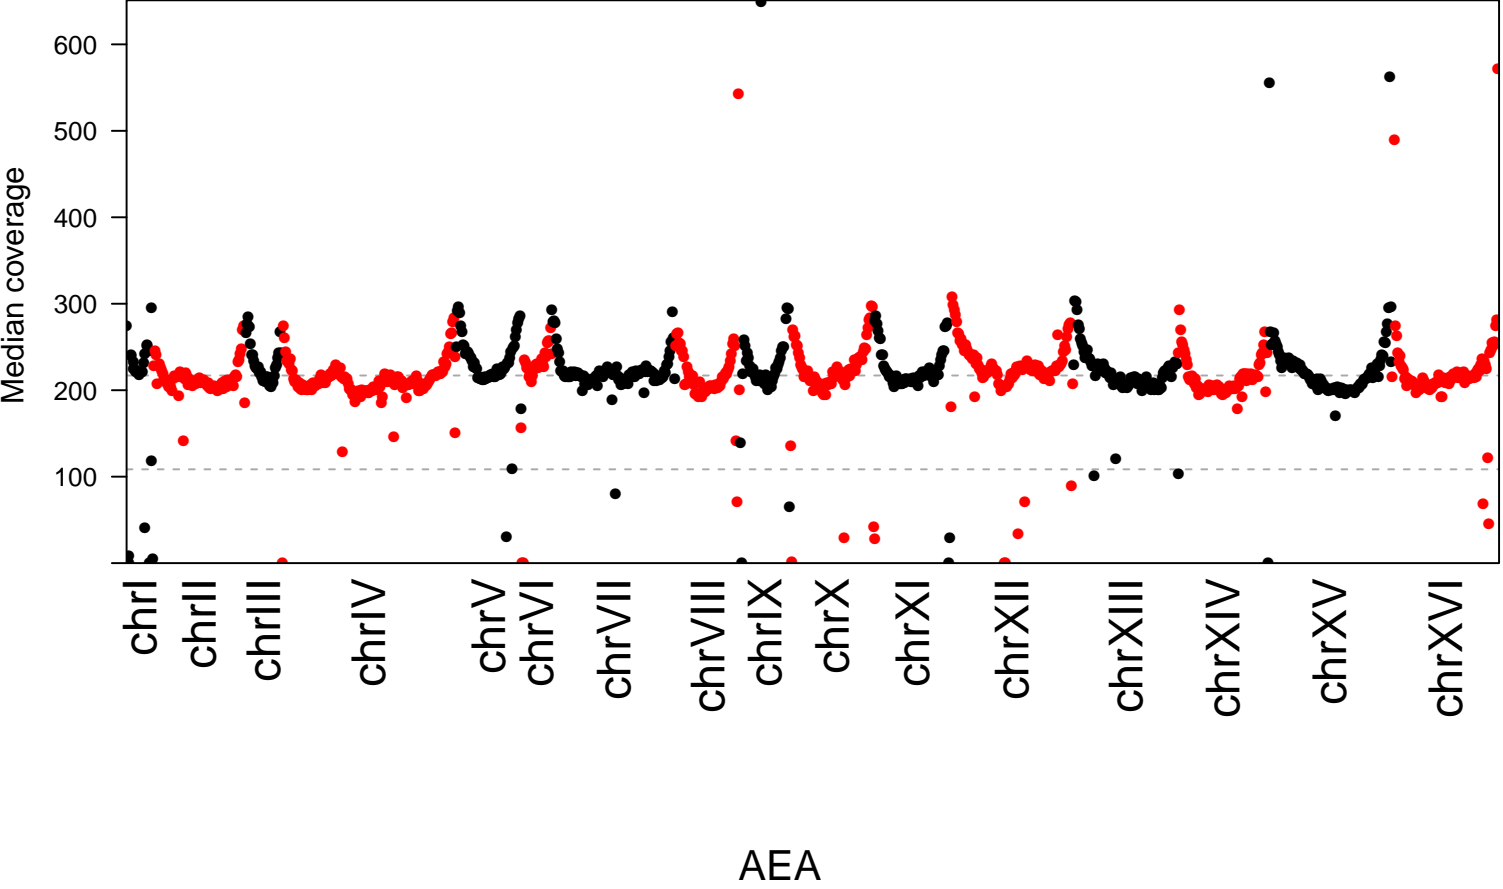

Supplementary Figure S2

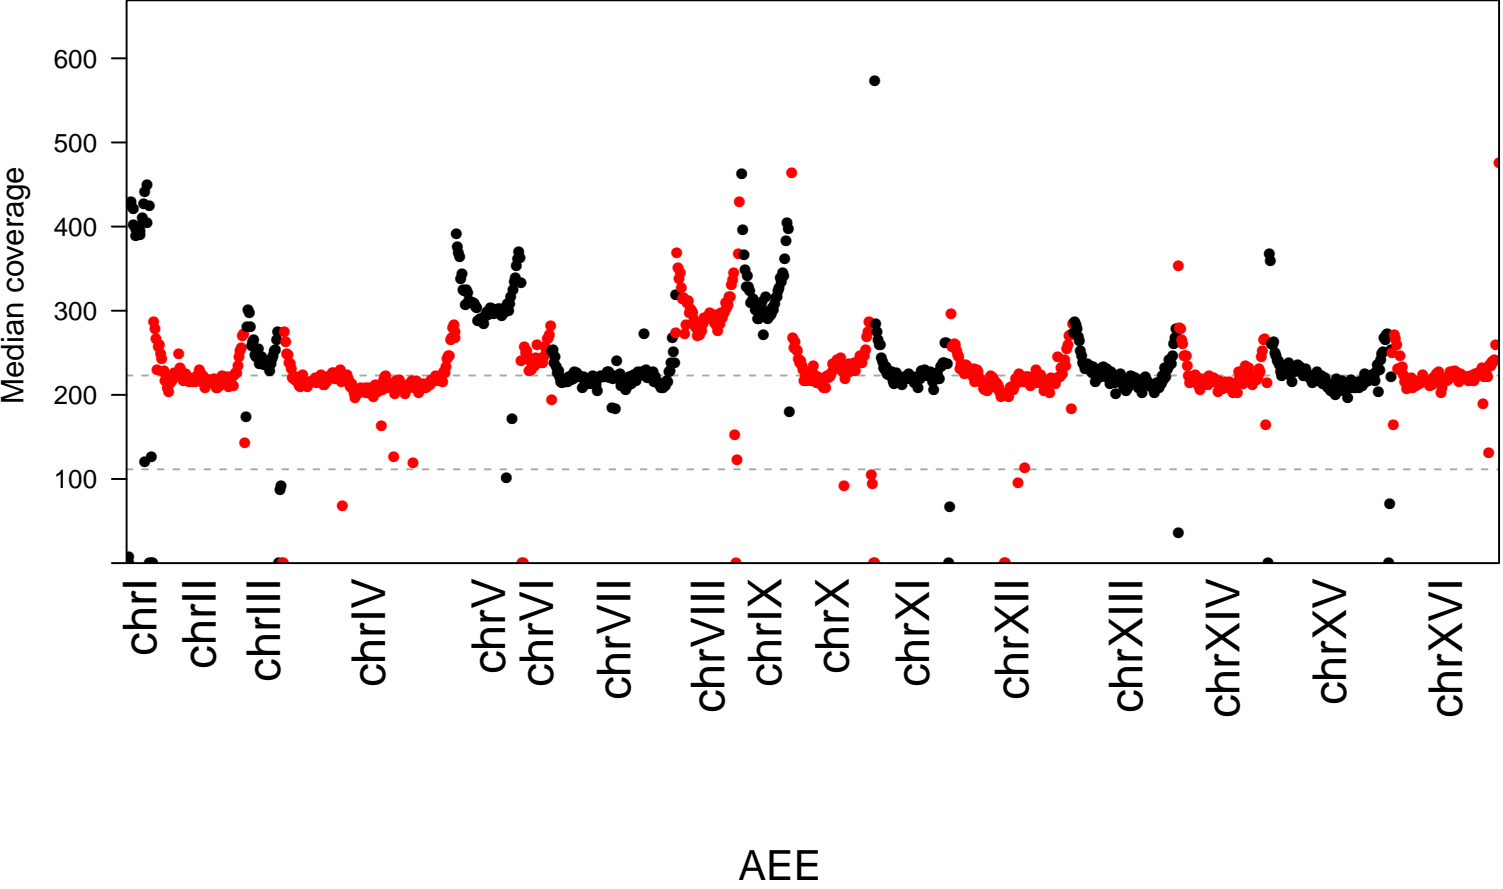



Supplementary Figure S2

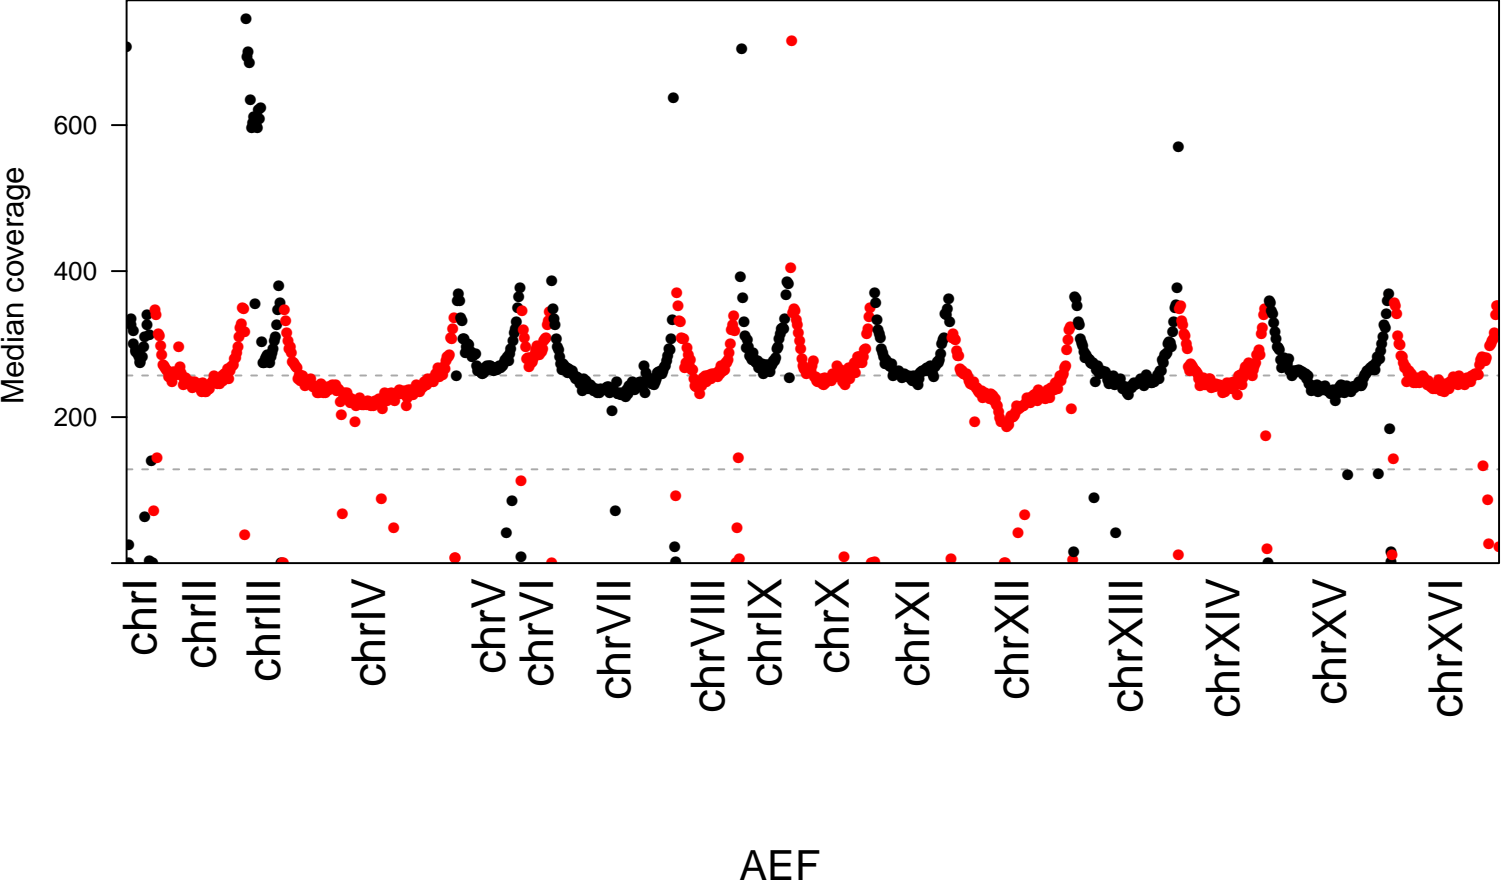

# Supplementary Figure S2

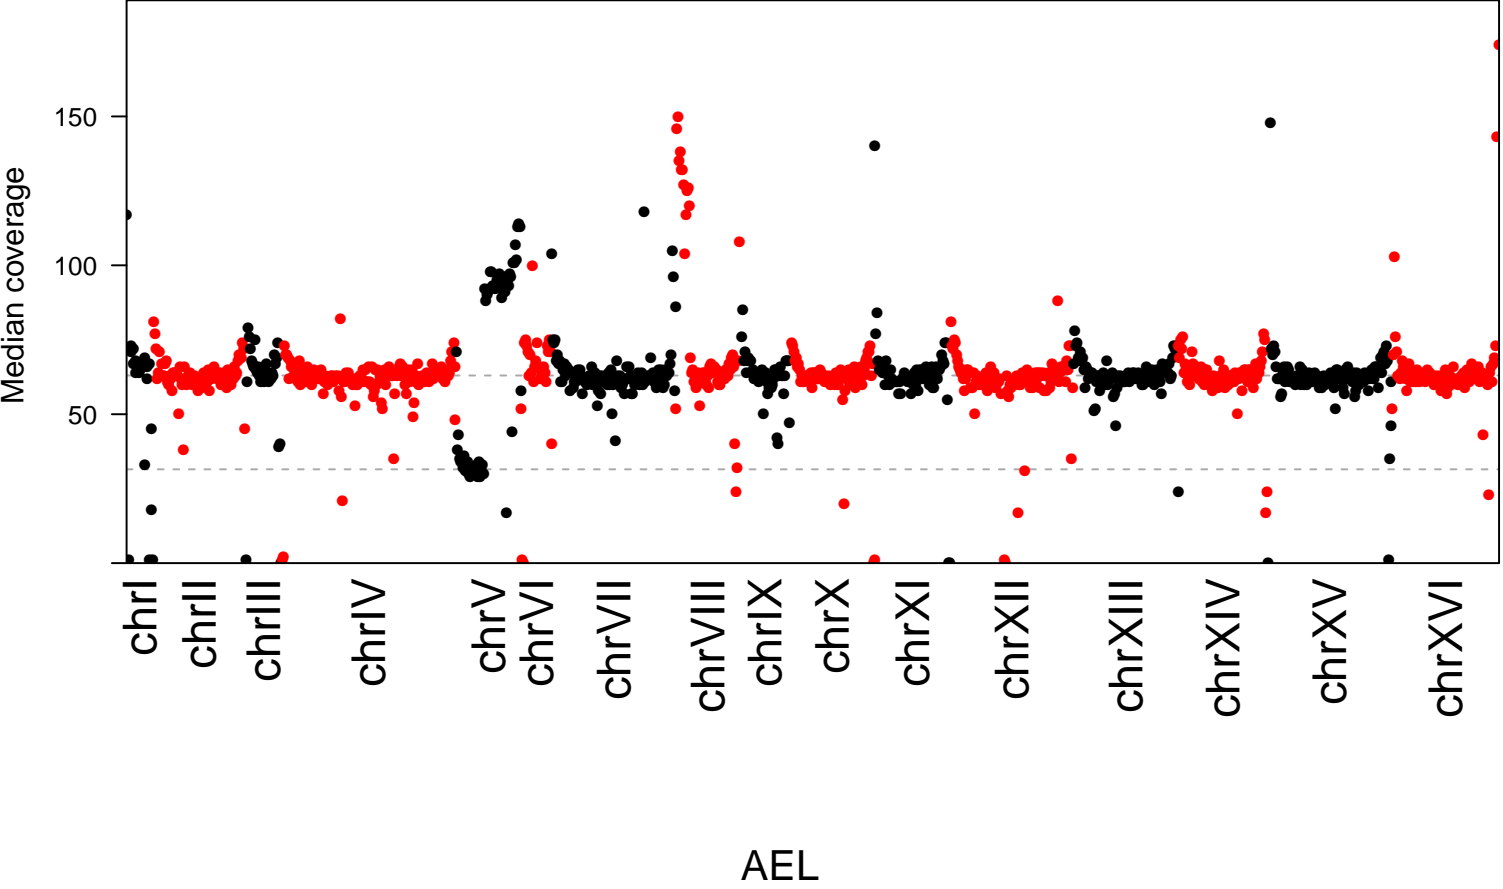

Supplementary Figure S2

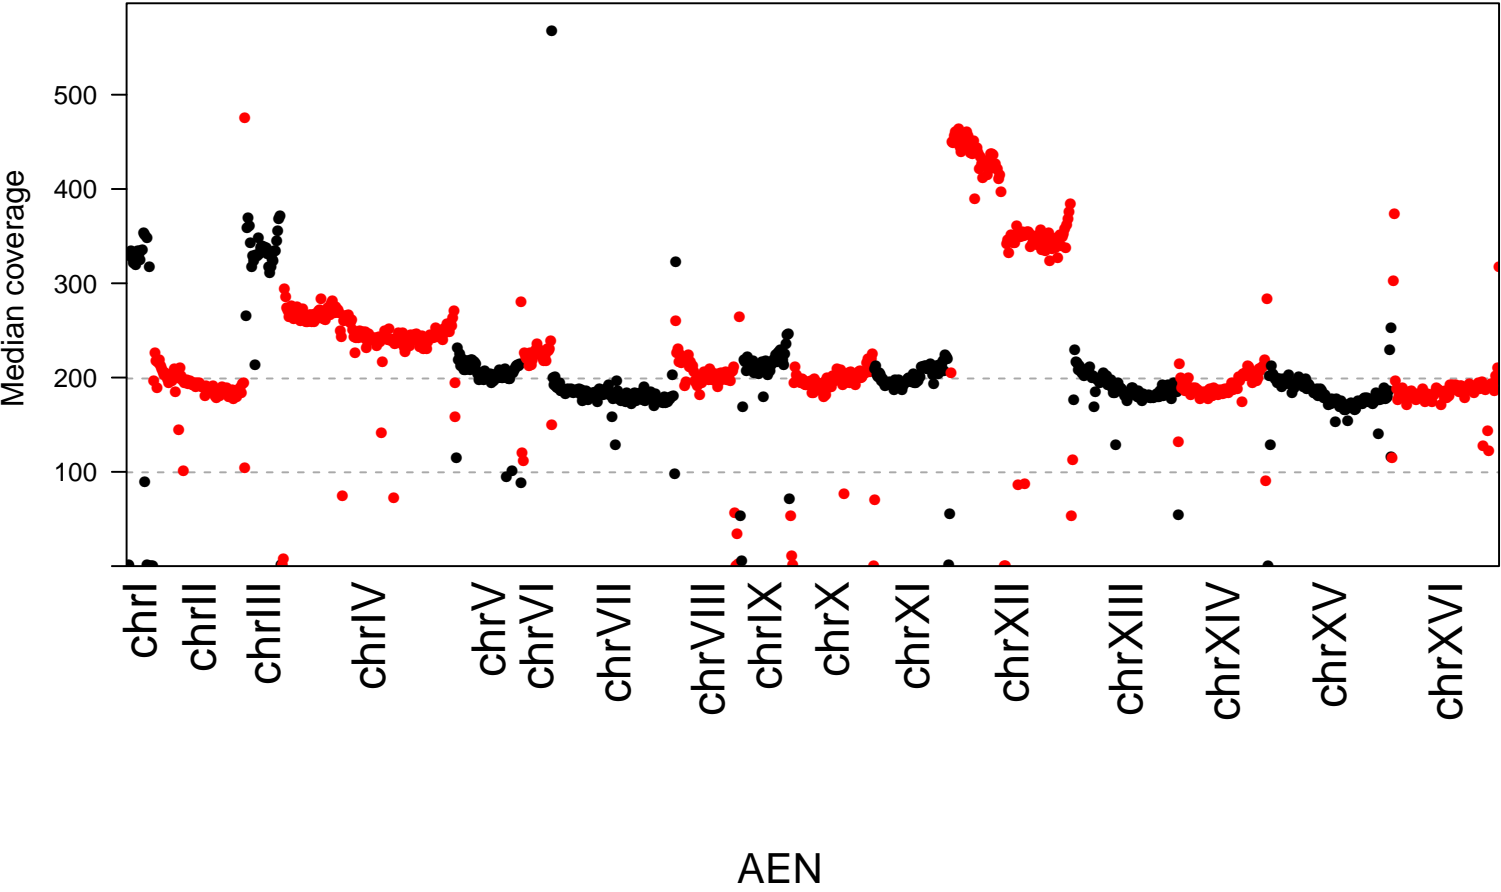

## Supplementary Figure S2

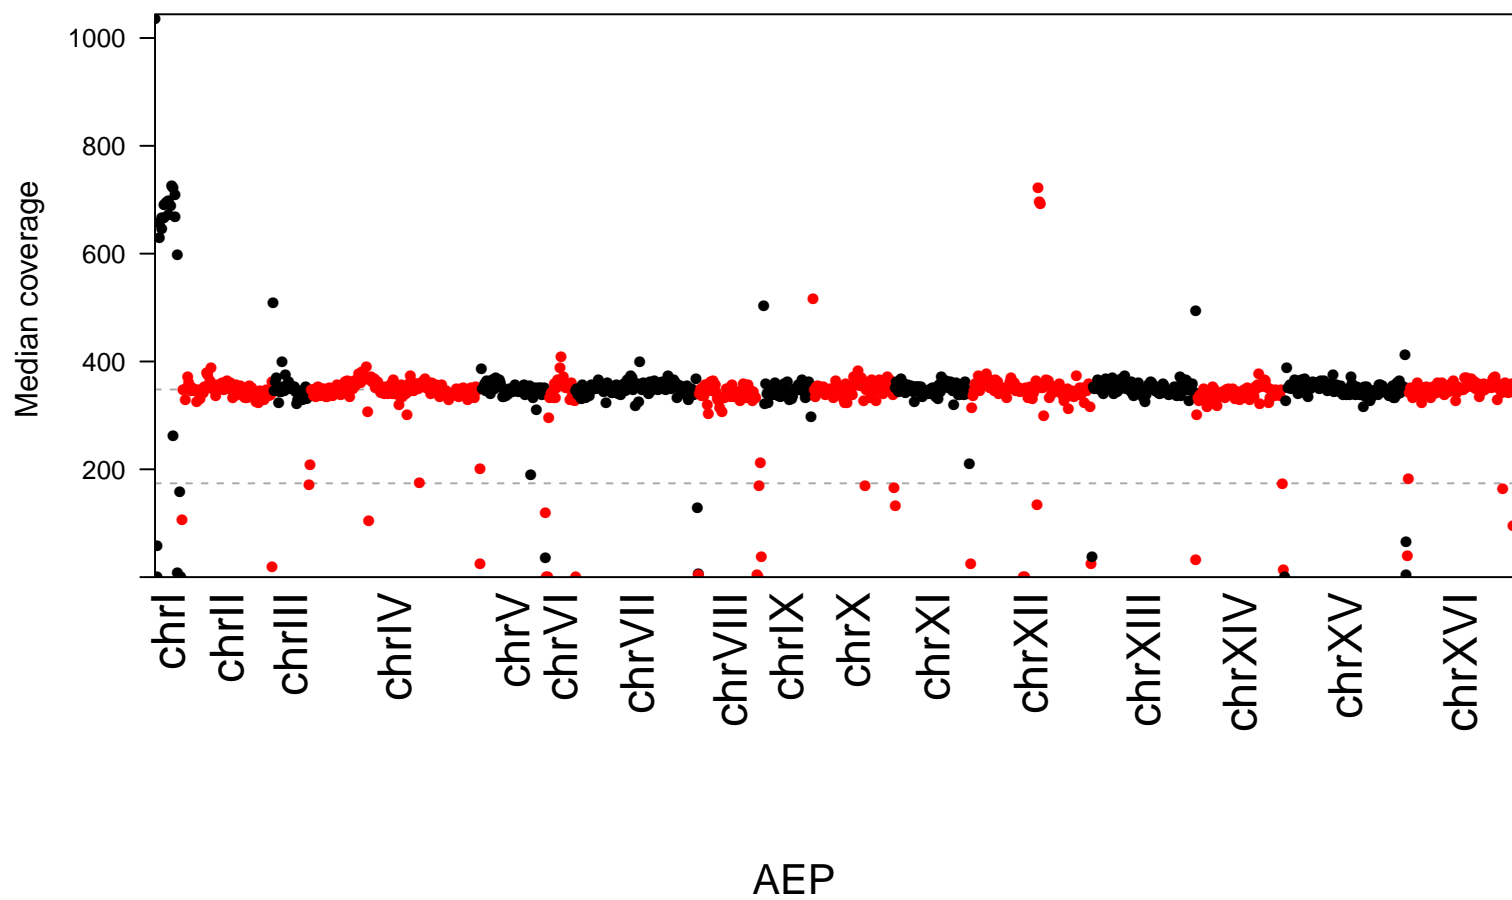

Supplementary Figure S2

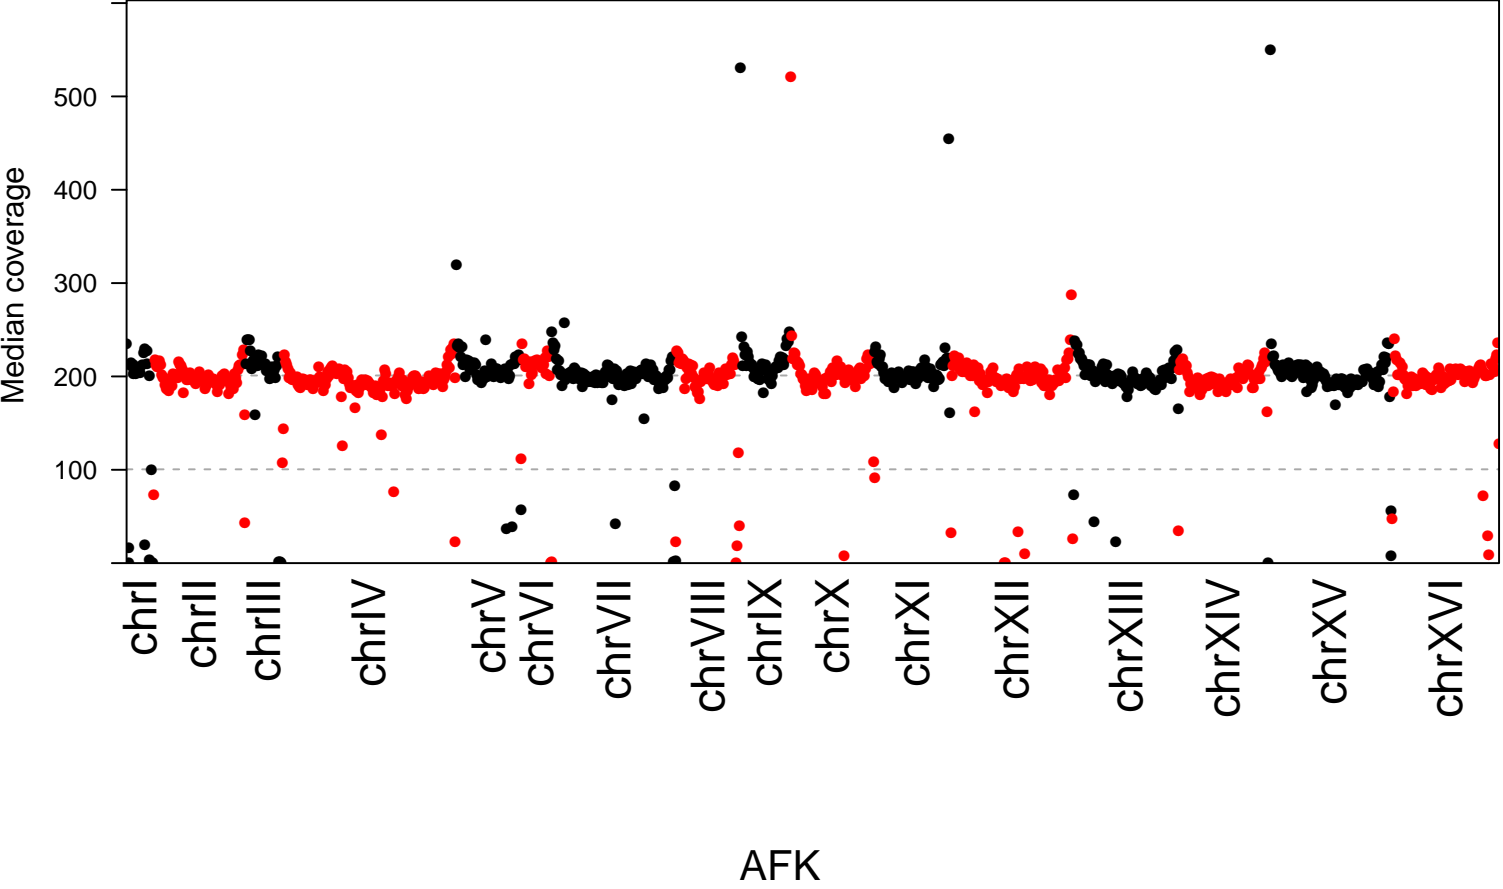

# Supplementary Figure S2

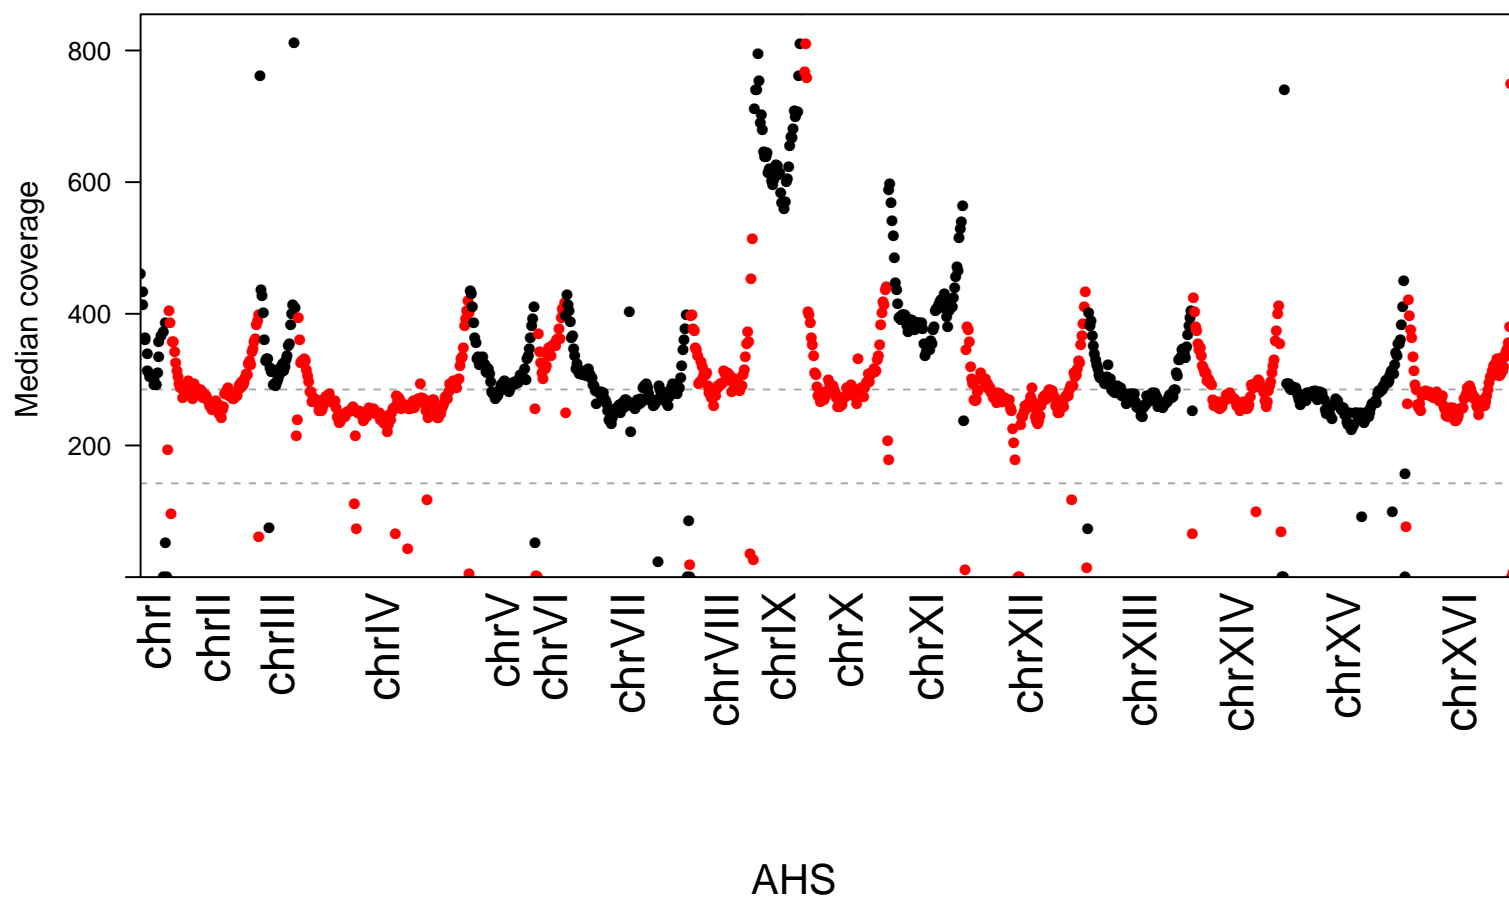

# Supplementary Figure S2

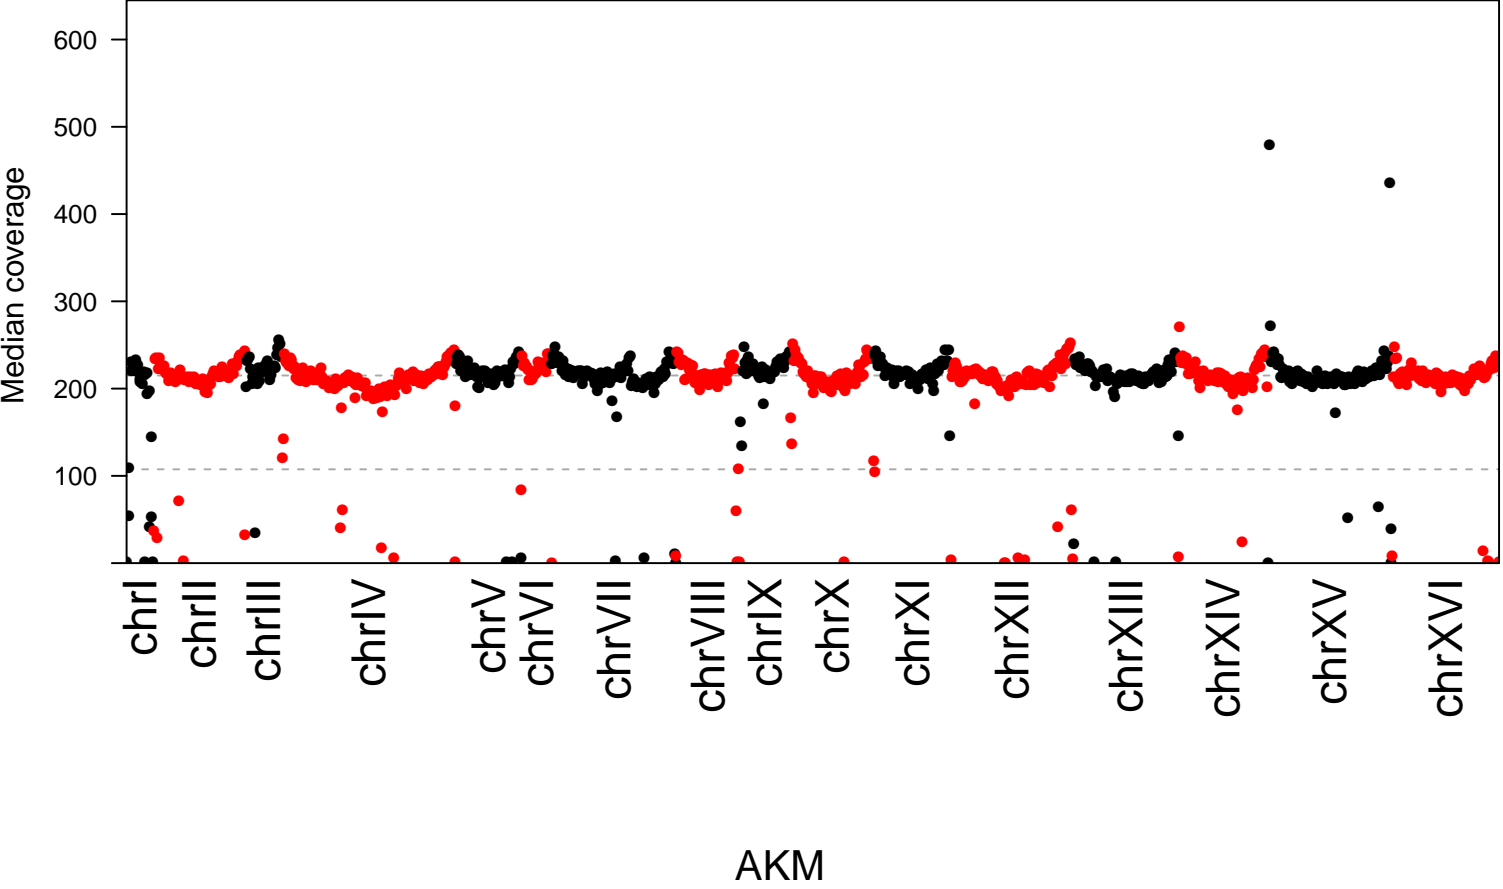

# Supplementary Figure S2

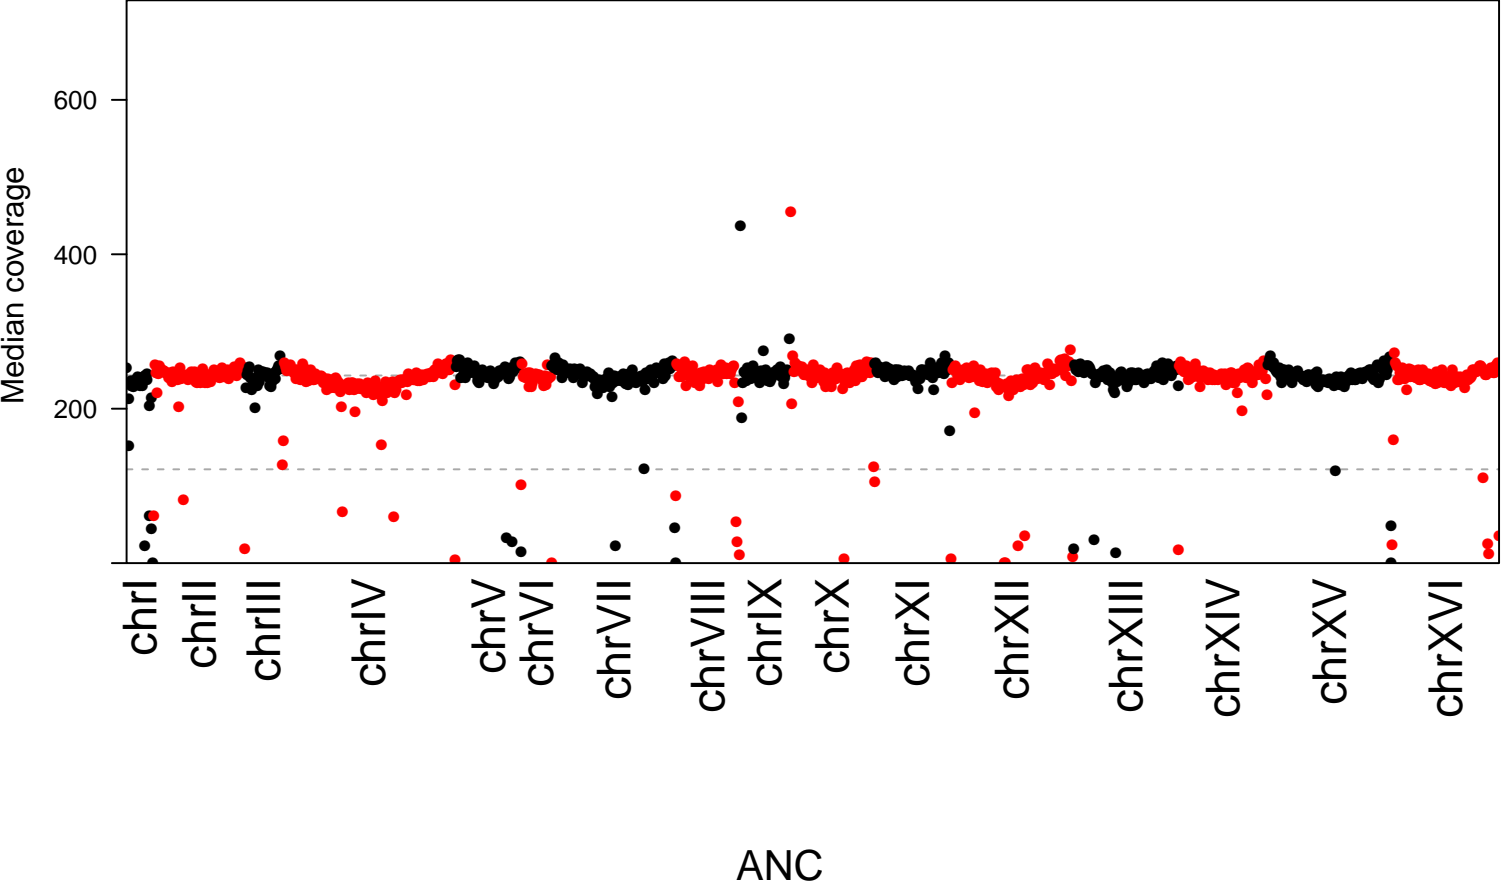



# Supplementary Figure S2

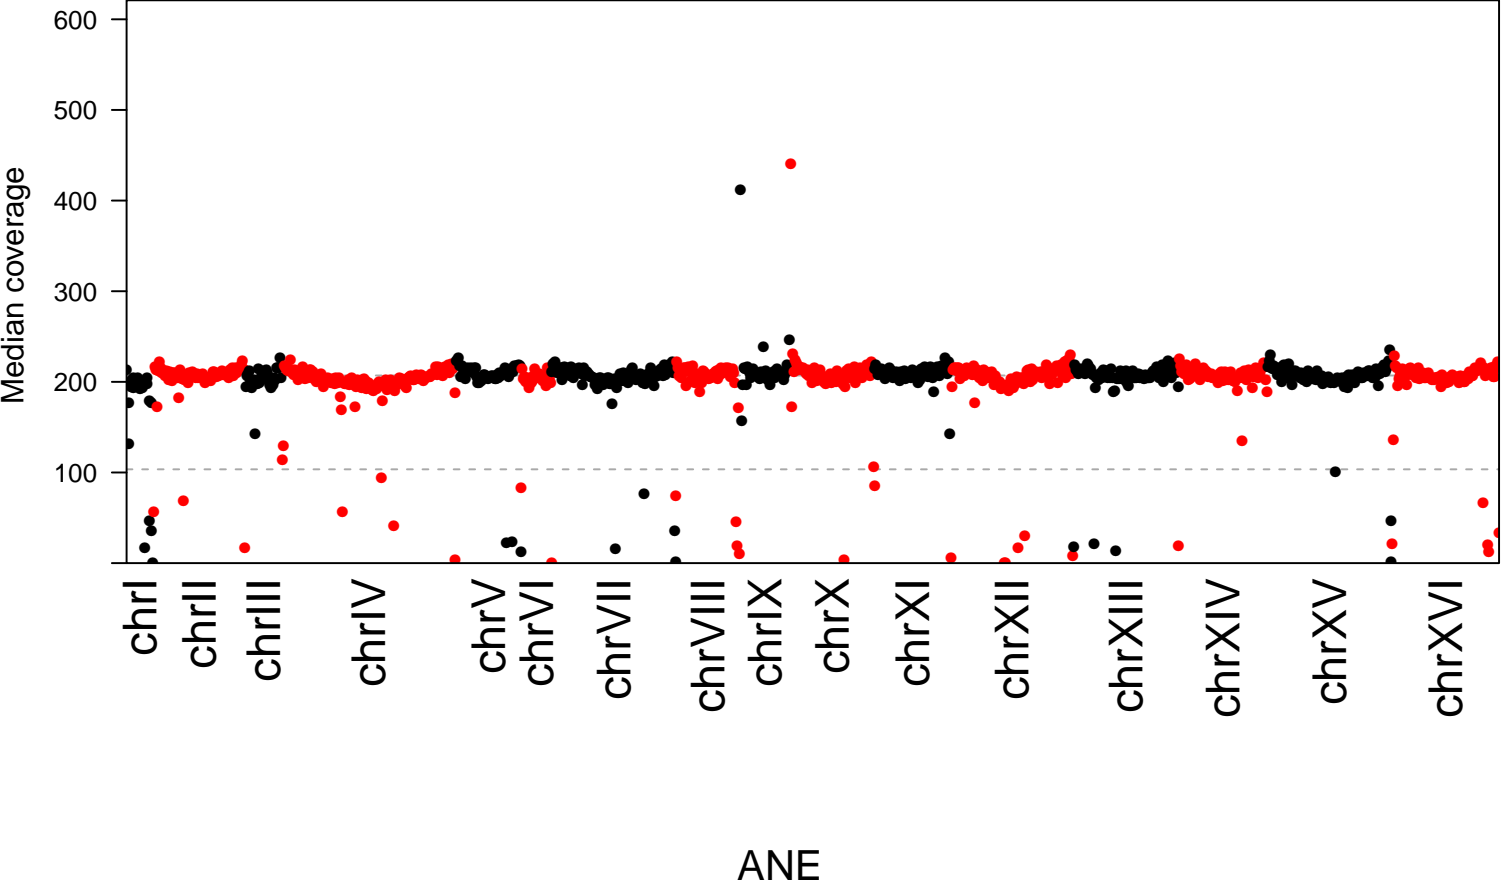

# Supplementary Figure S2

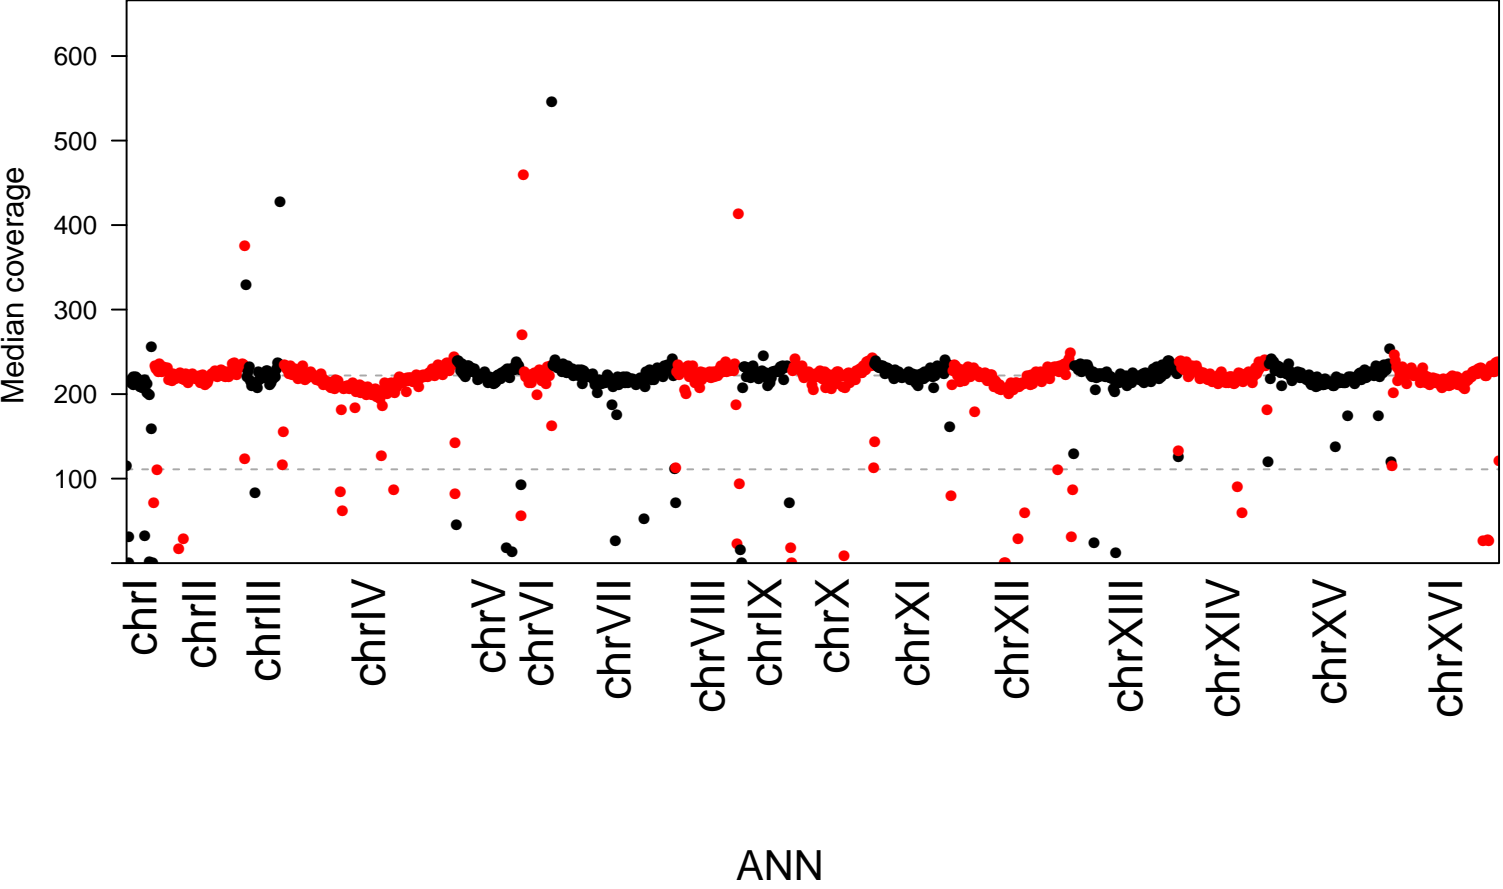

Supplementary Figure S2

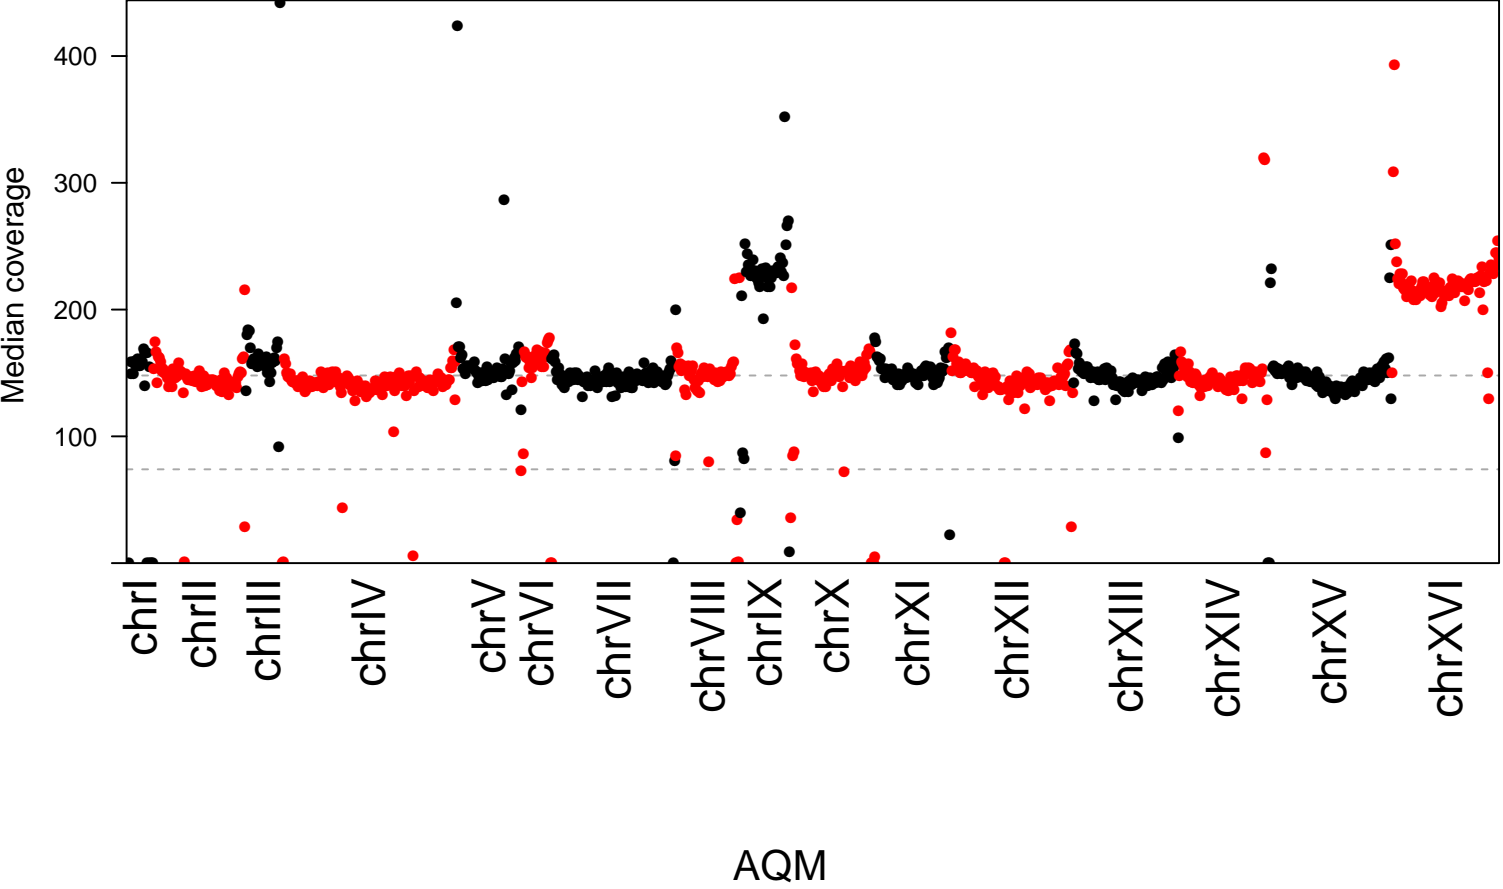

## Supplementary Figure S2

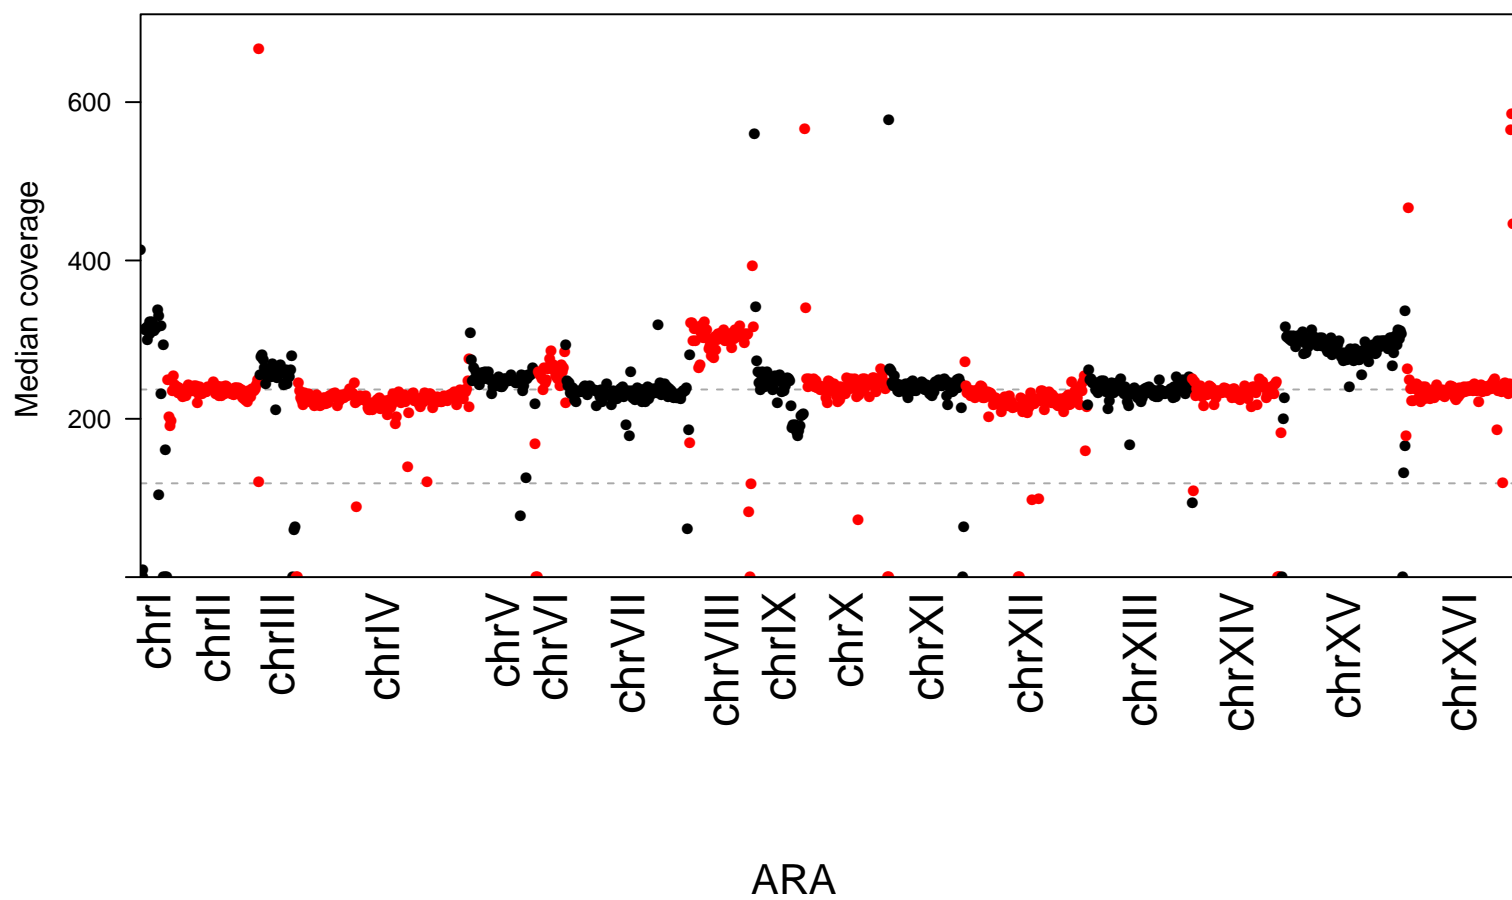

Supplementary Figure S2

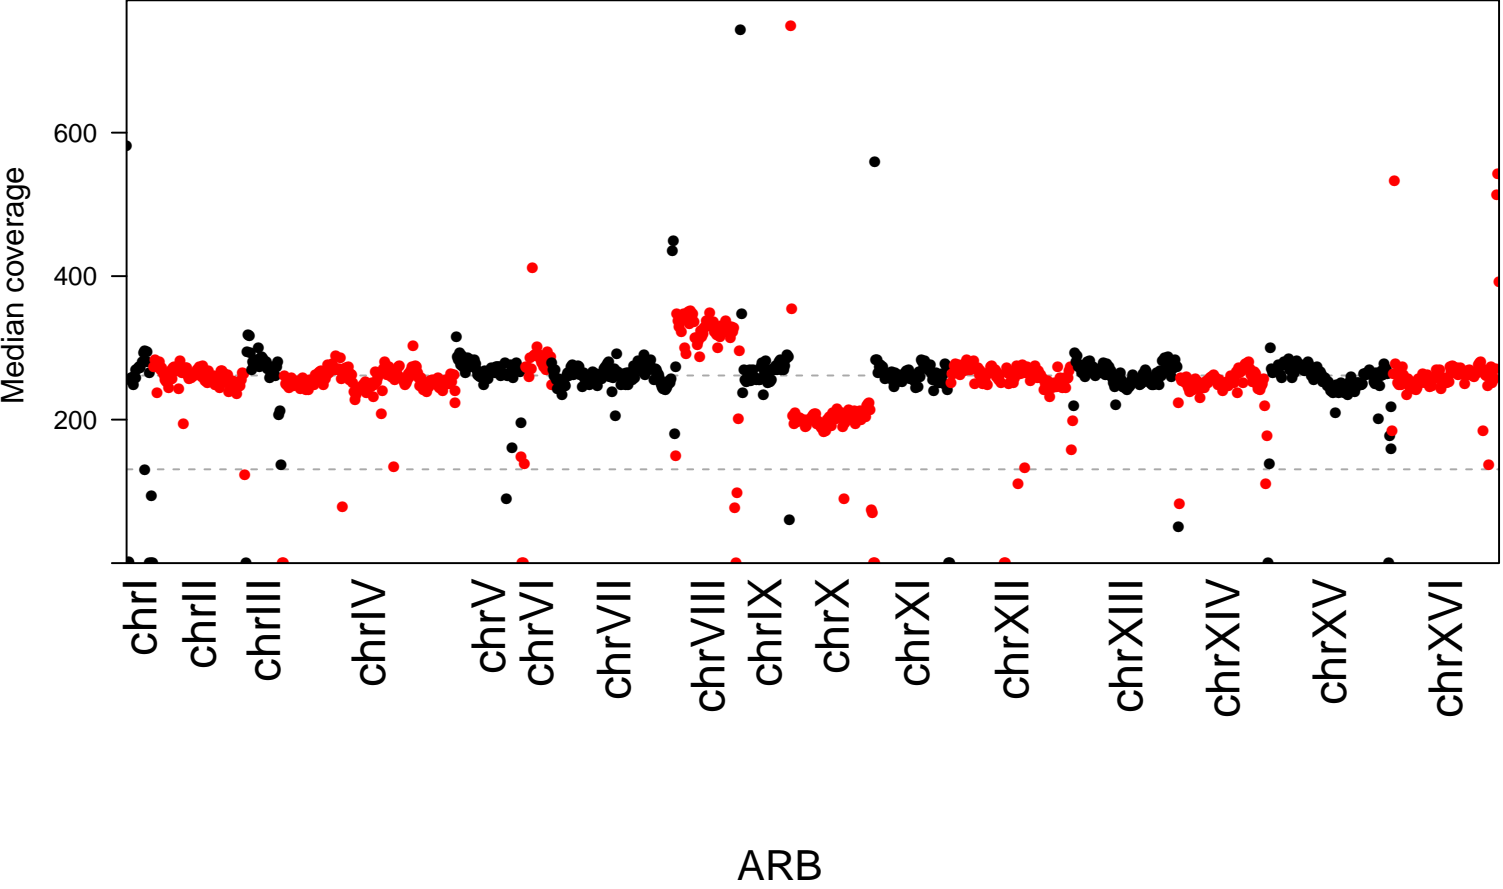

## Supplementary Figure S2

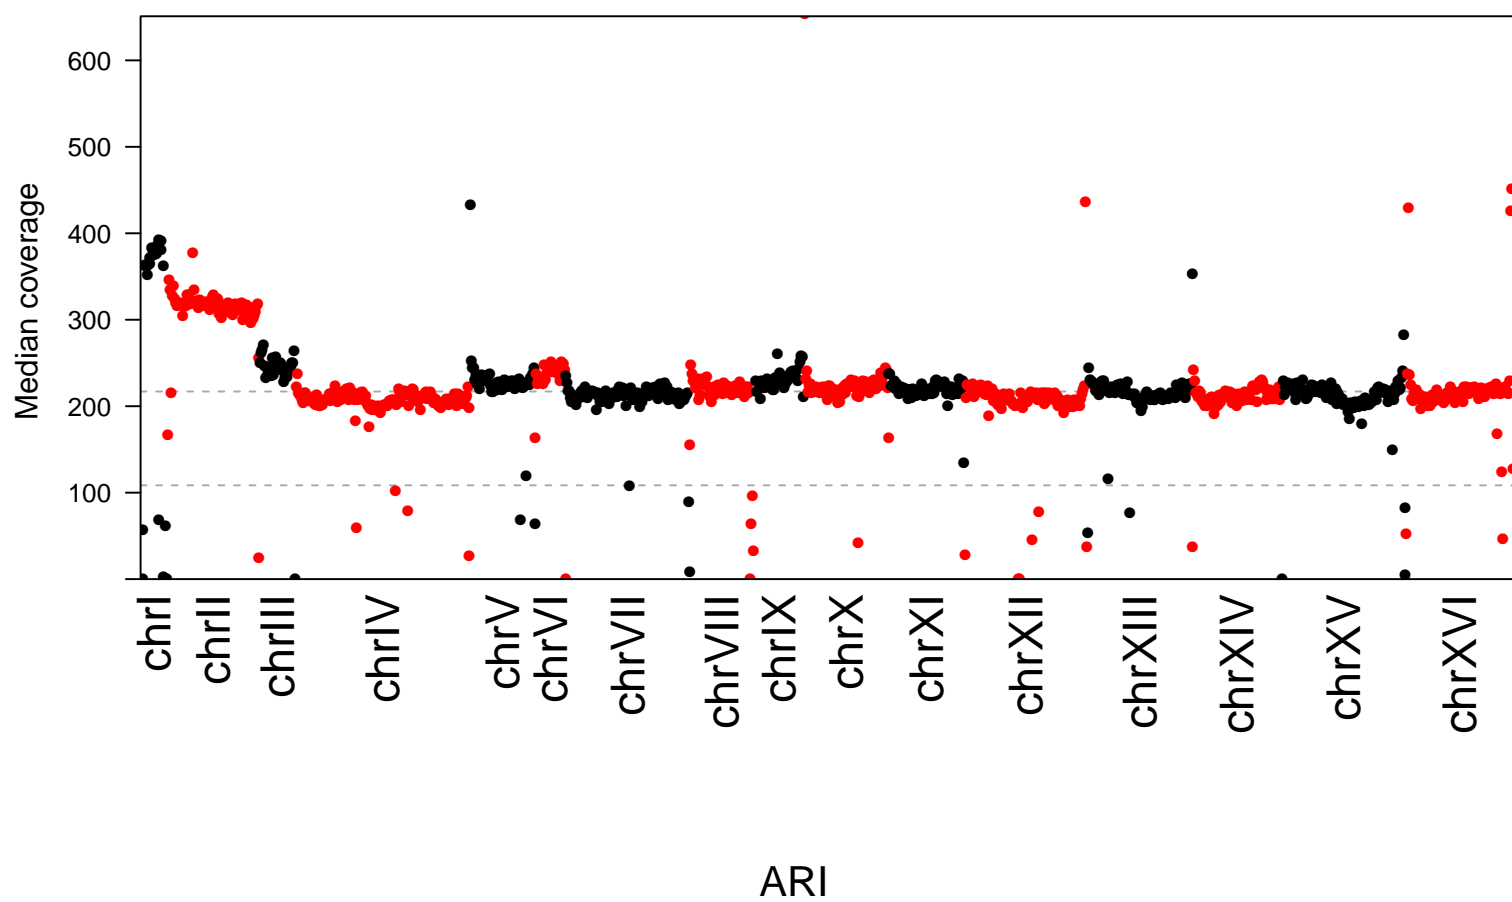

Supplementary Figure S2

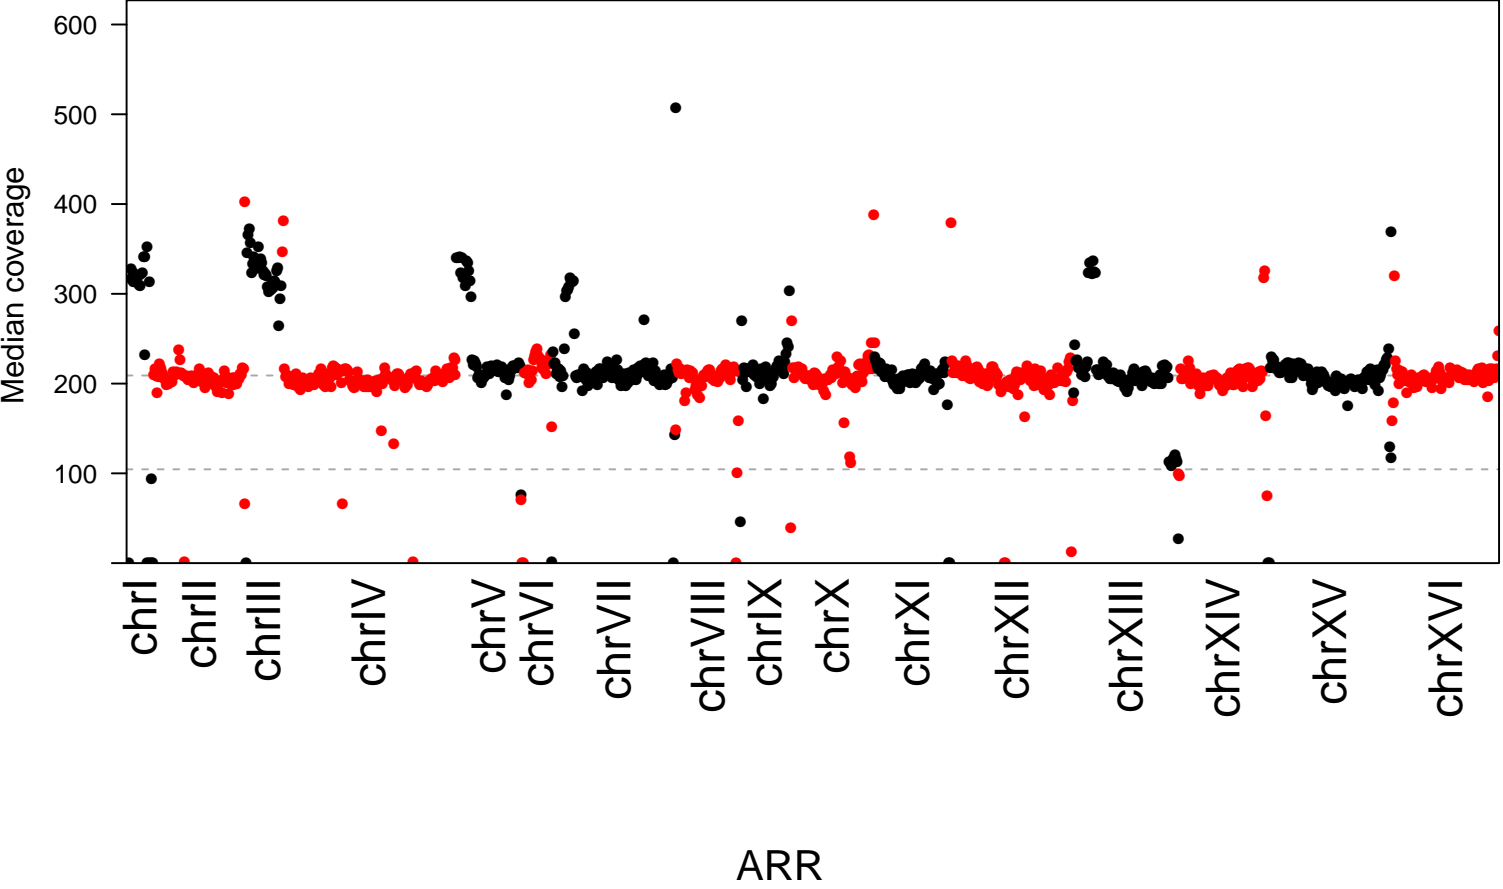

# Supplementary Figure S2

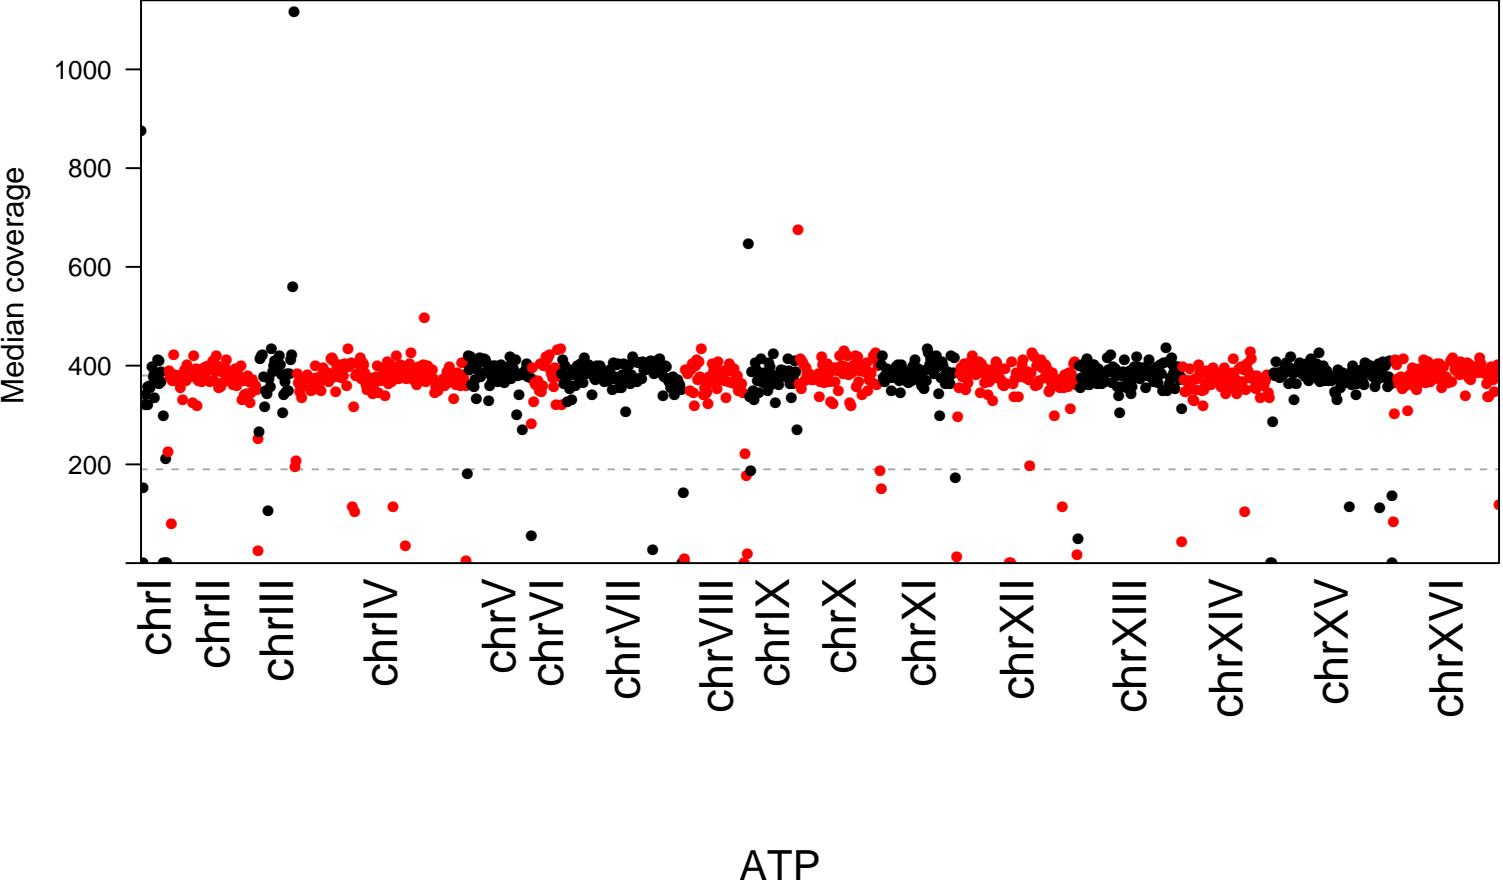



# Supplementary Figure S2

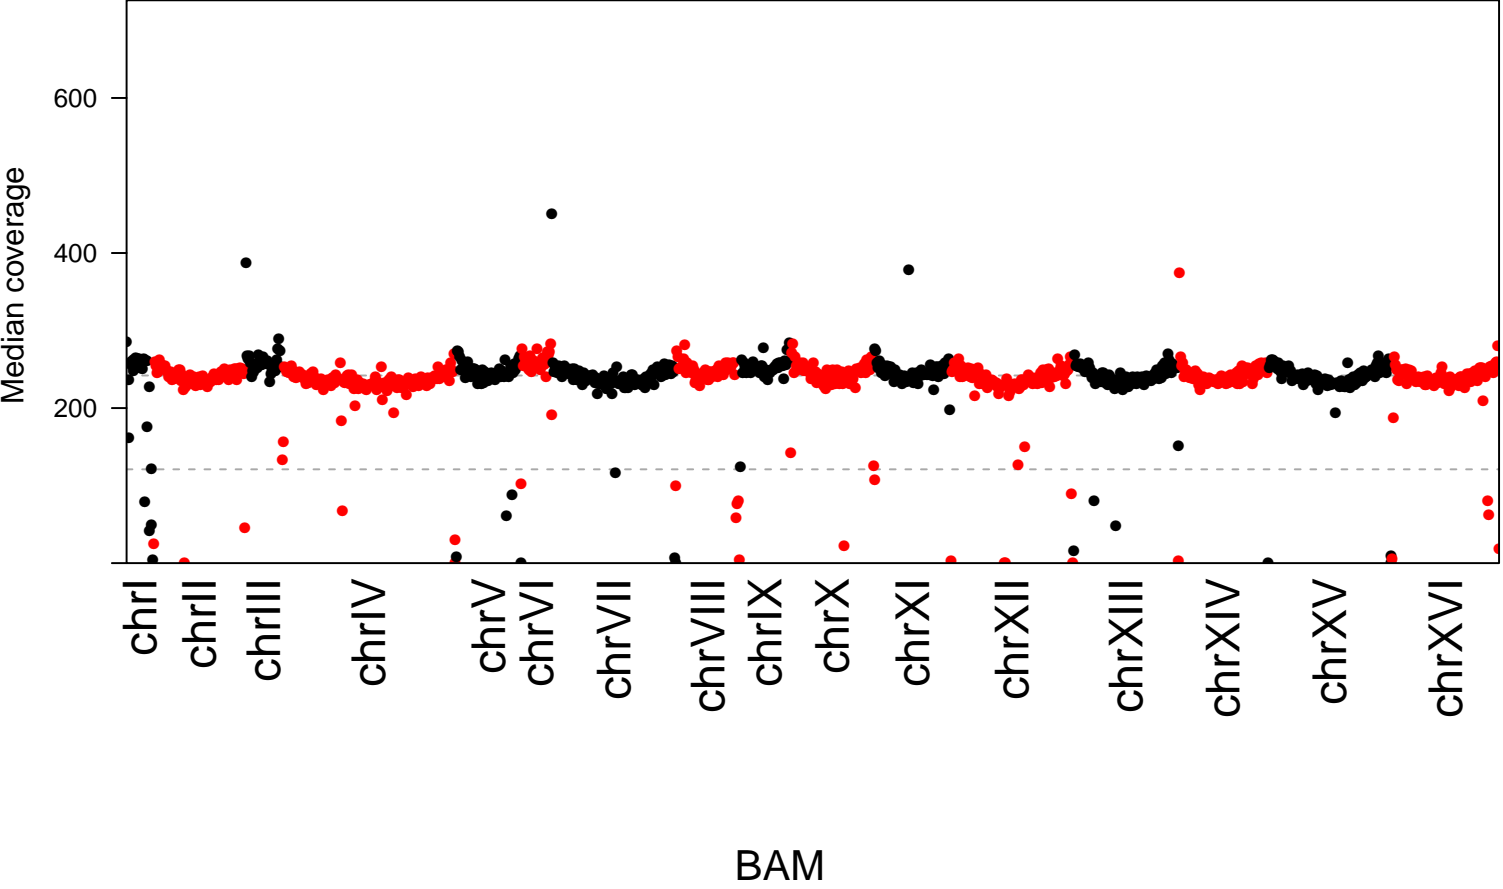

Supplementary Figure S2

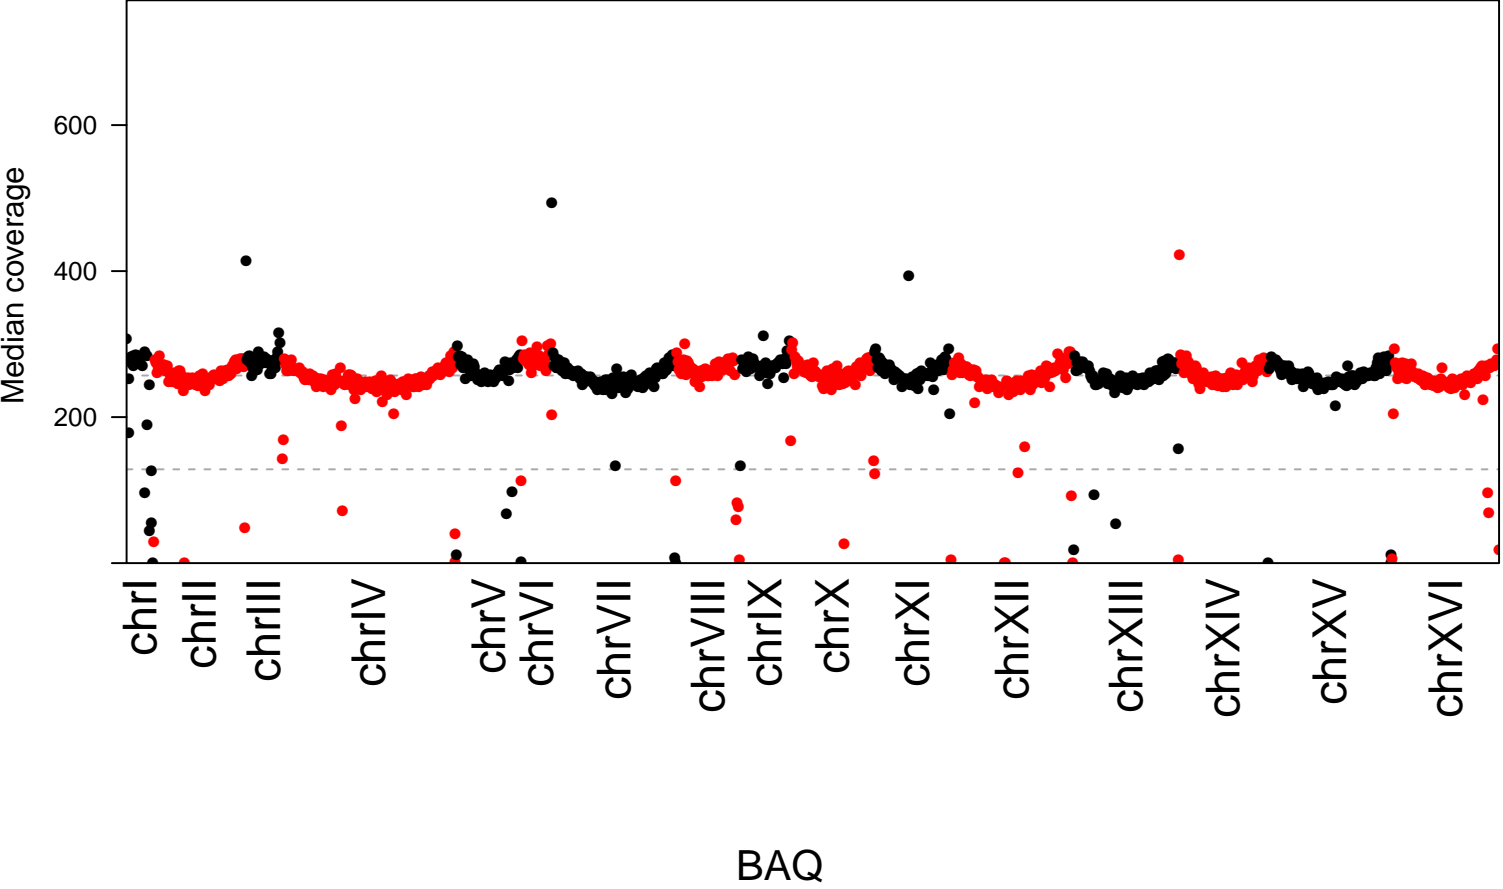

## Supplementary Figure S2

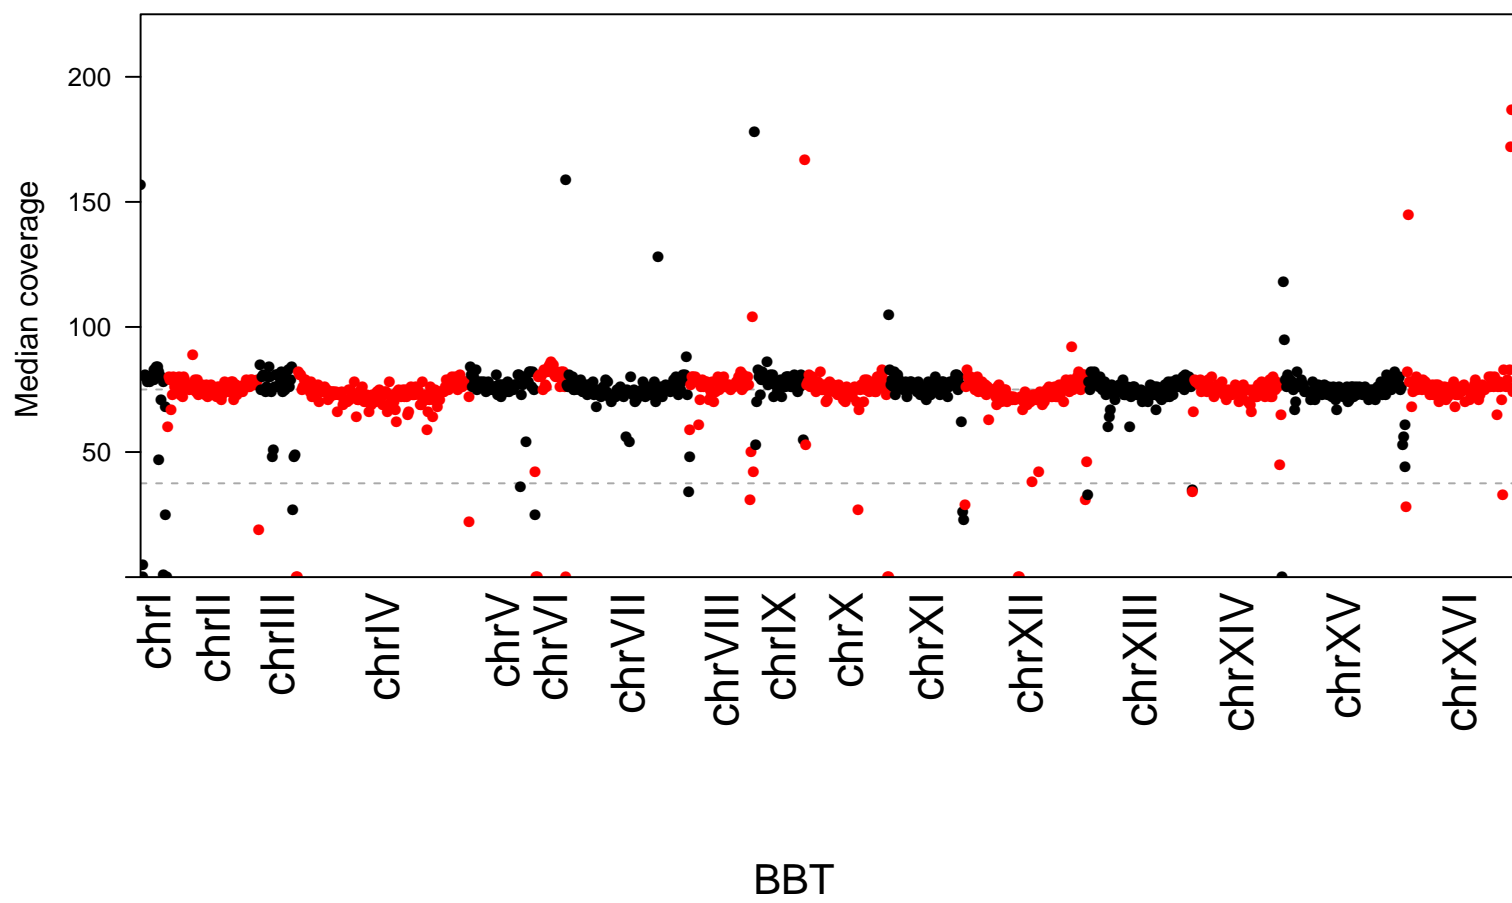

# Supplementary Figure S2

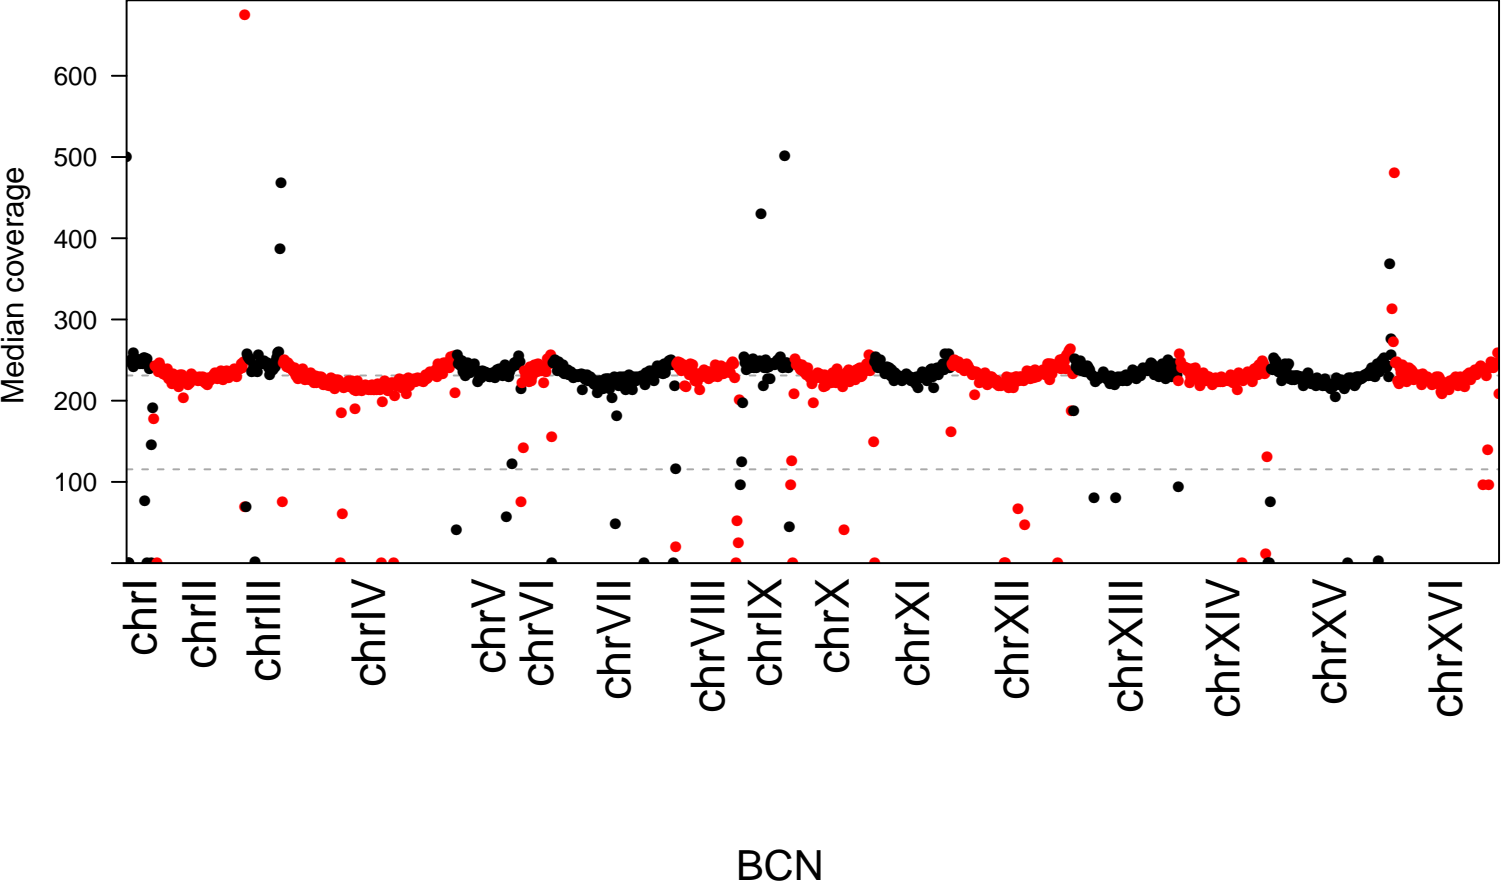

## Supplementary Figure S2

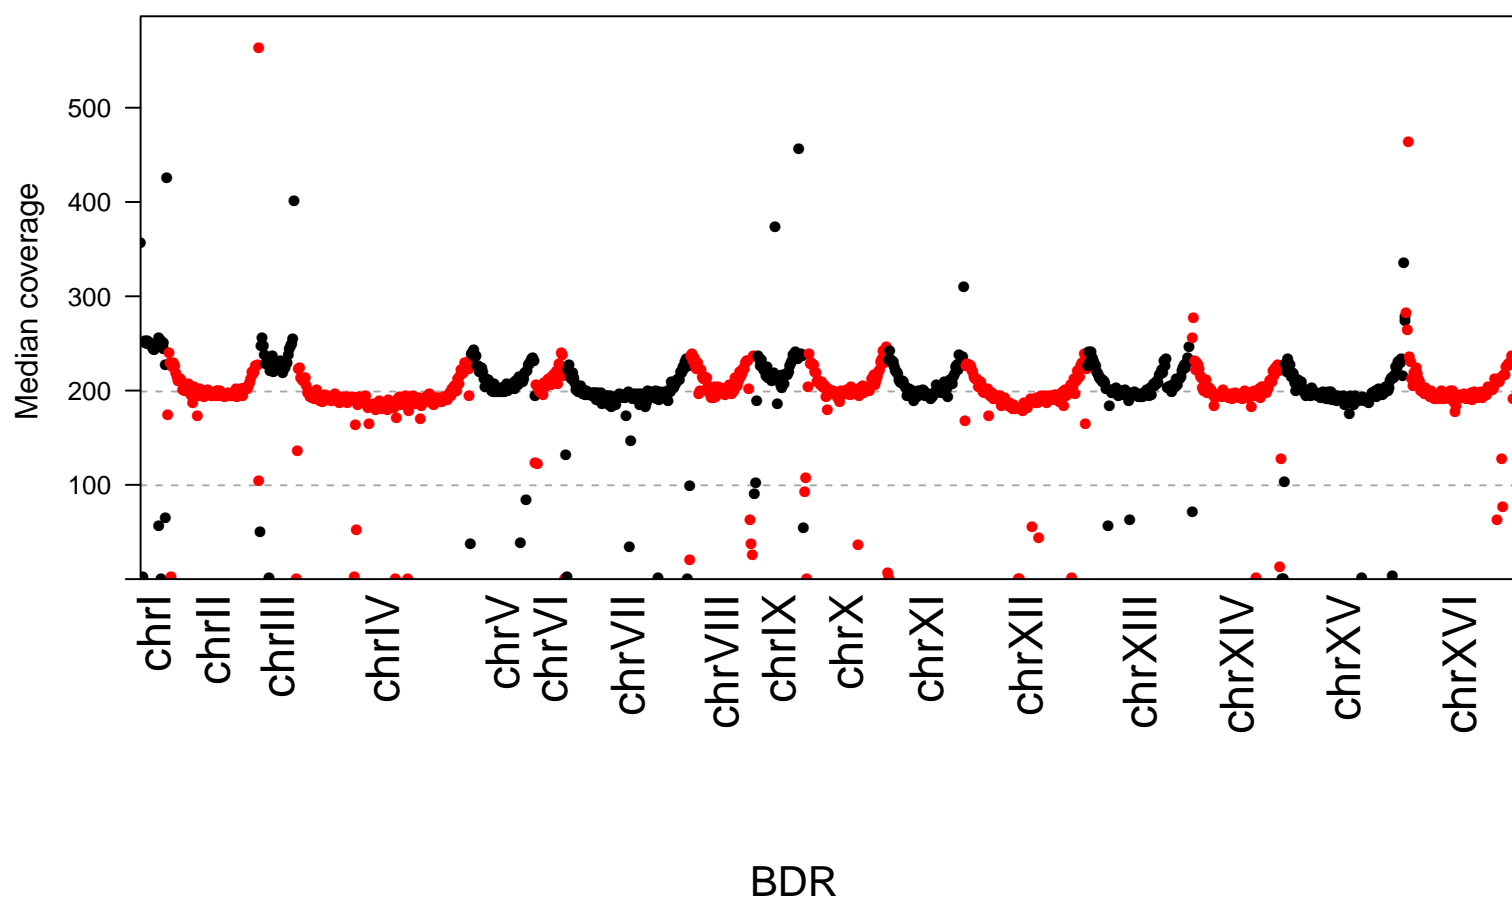

# Supplementary Figure S2

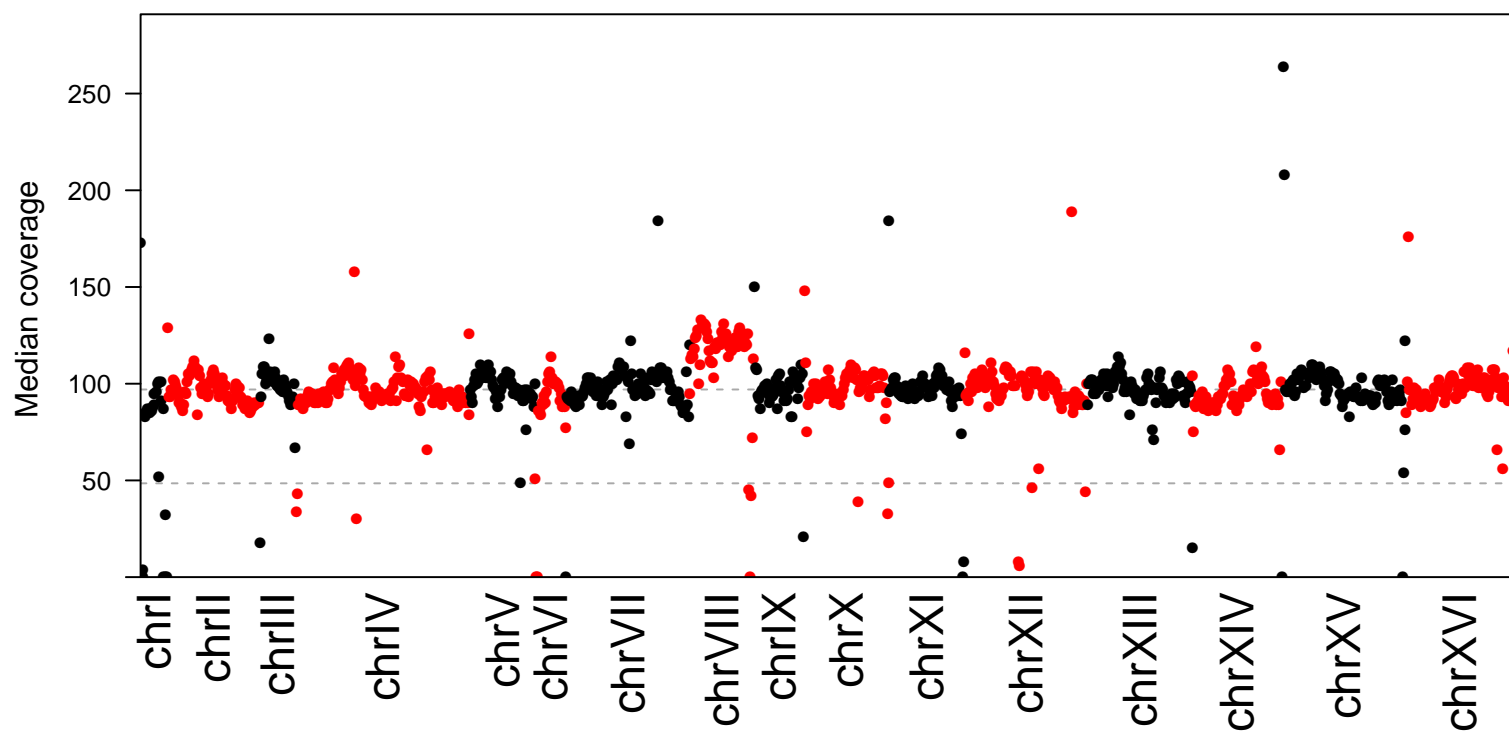

beer022

## Supplementary Figure S2

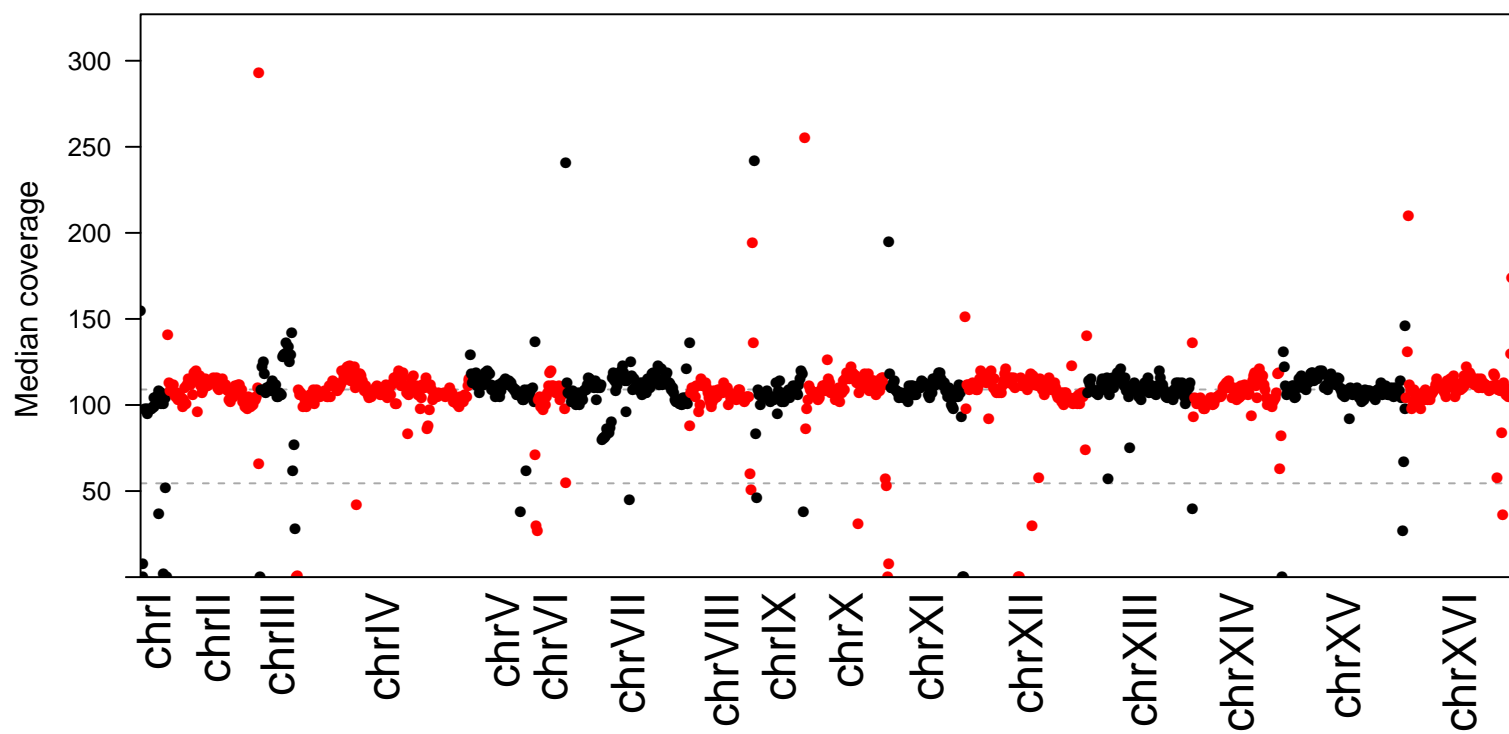

beer028

# Supplementary Figure S2

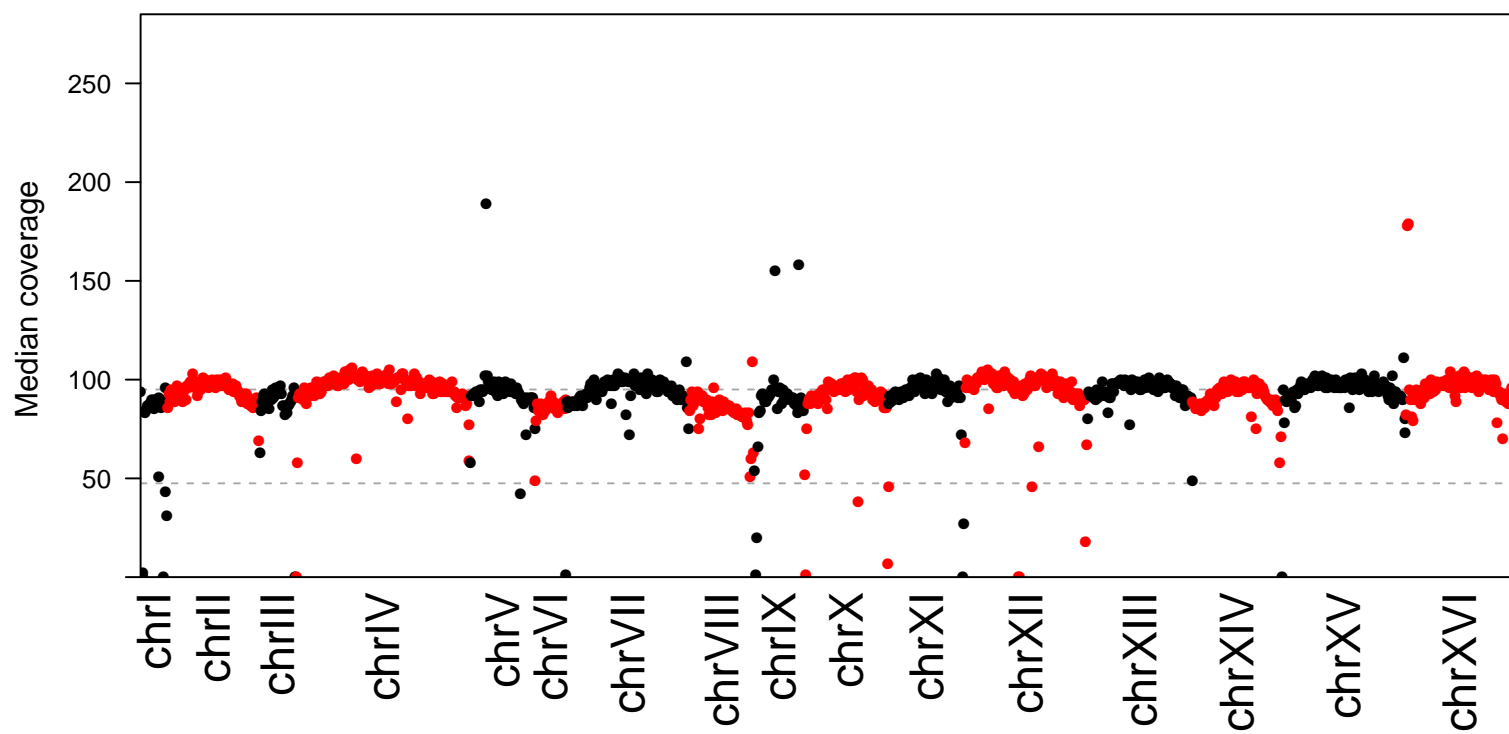

beer034



# Supplementary Figure S2

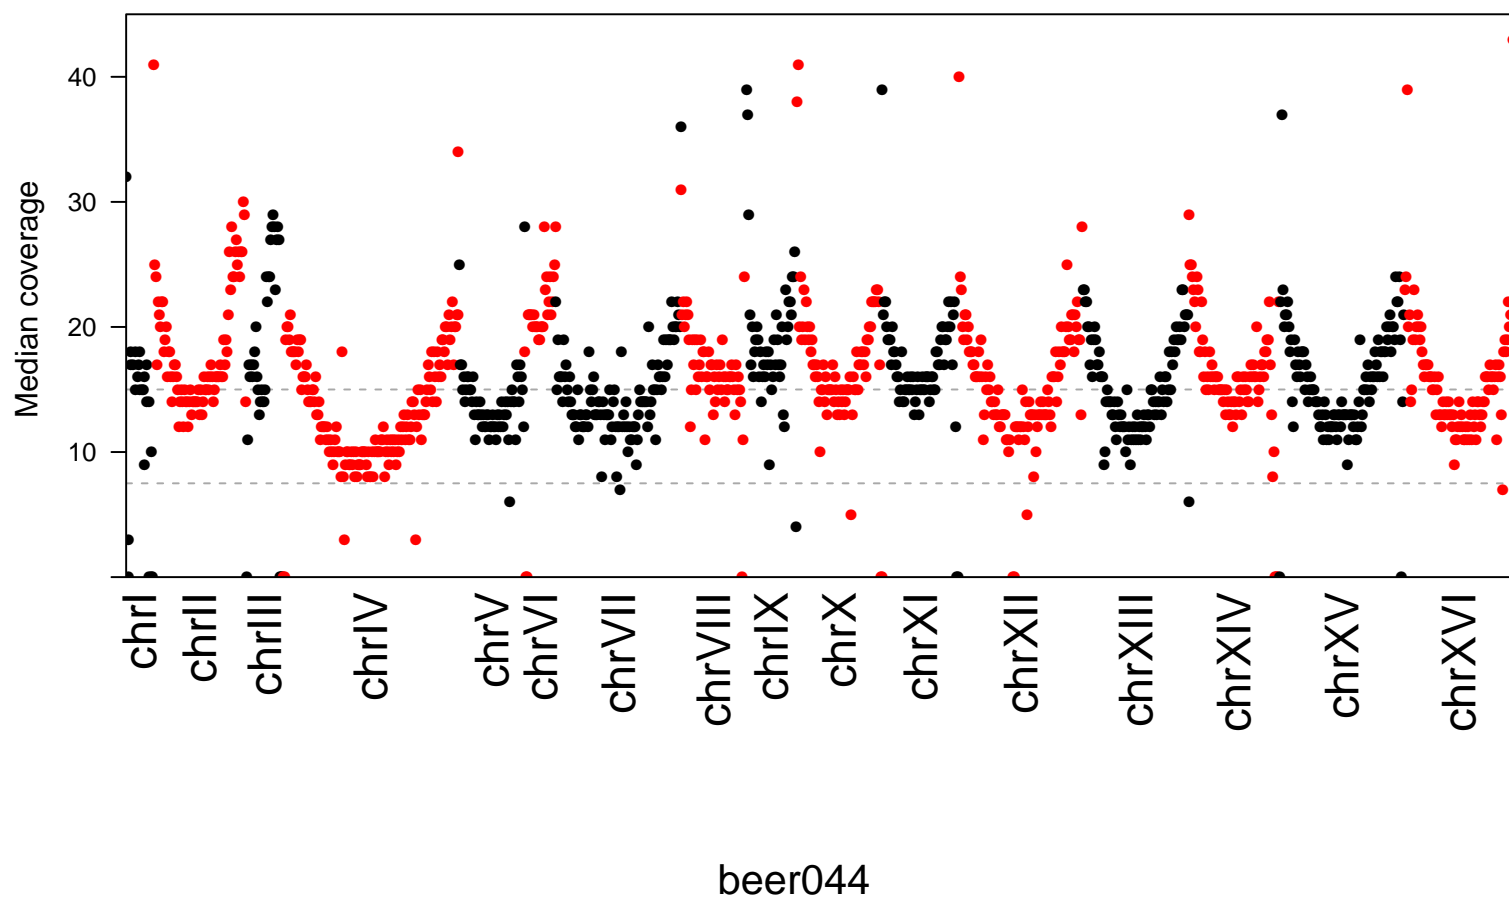

Supplementary Figure S2

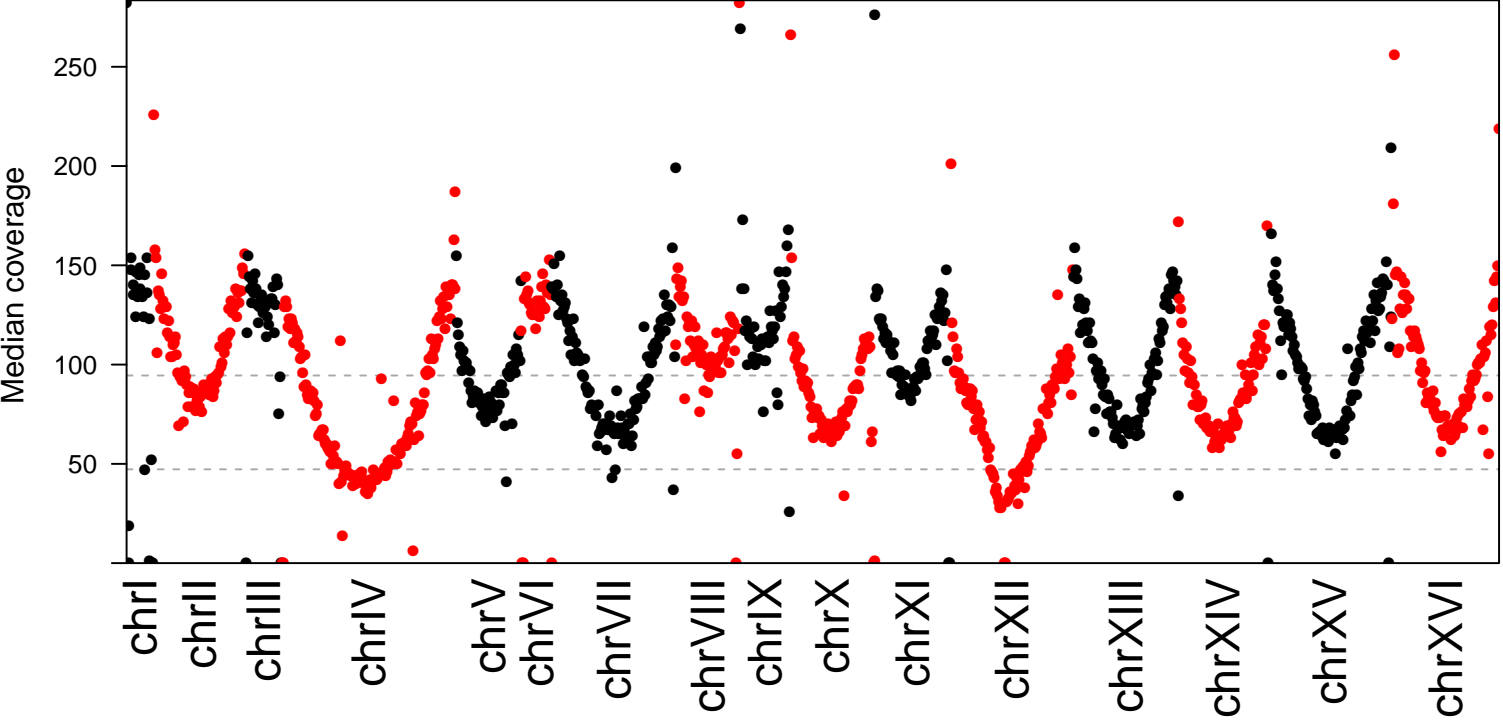

beer045

Supplementary Figure S2

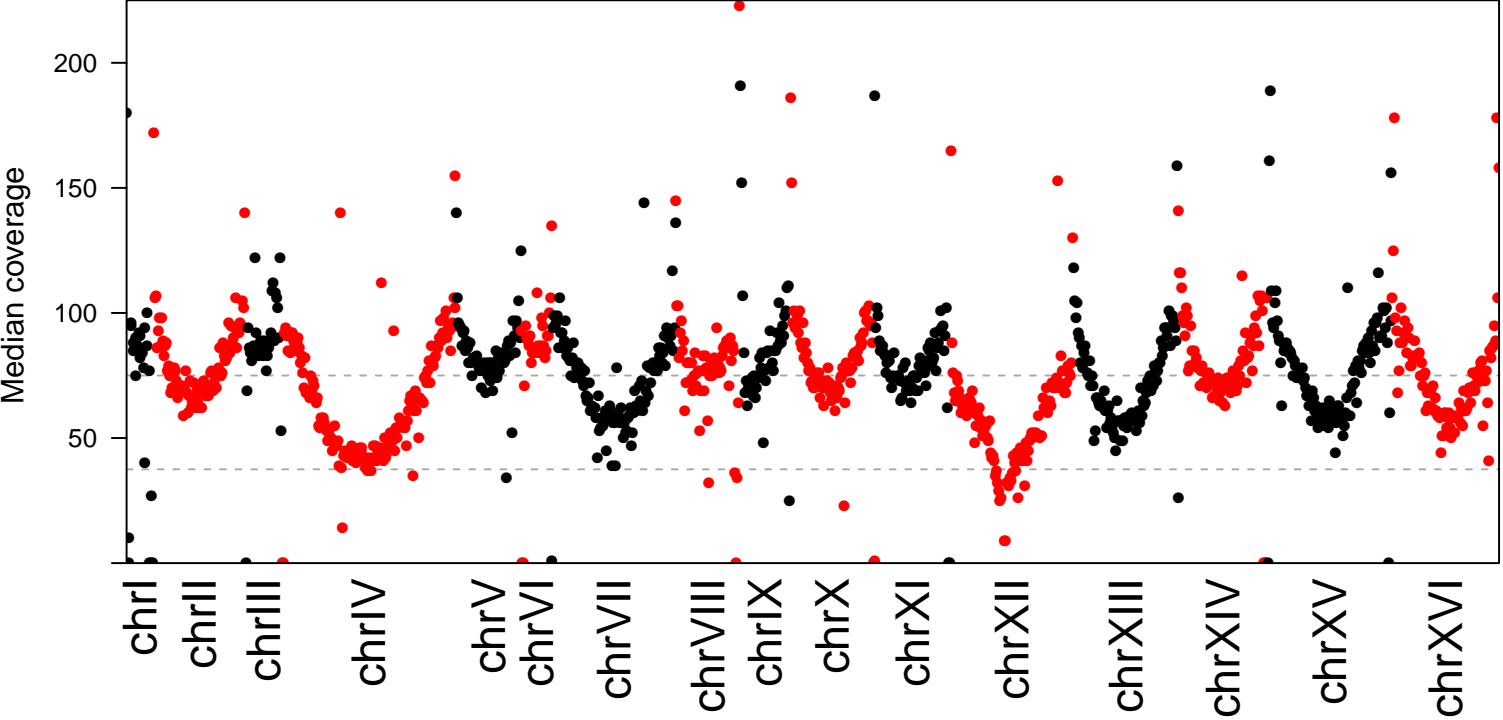

beer046

# Supplementary Figure S2

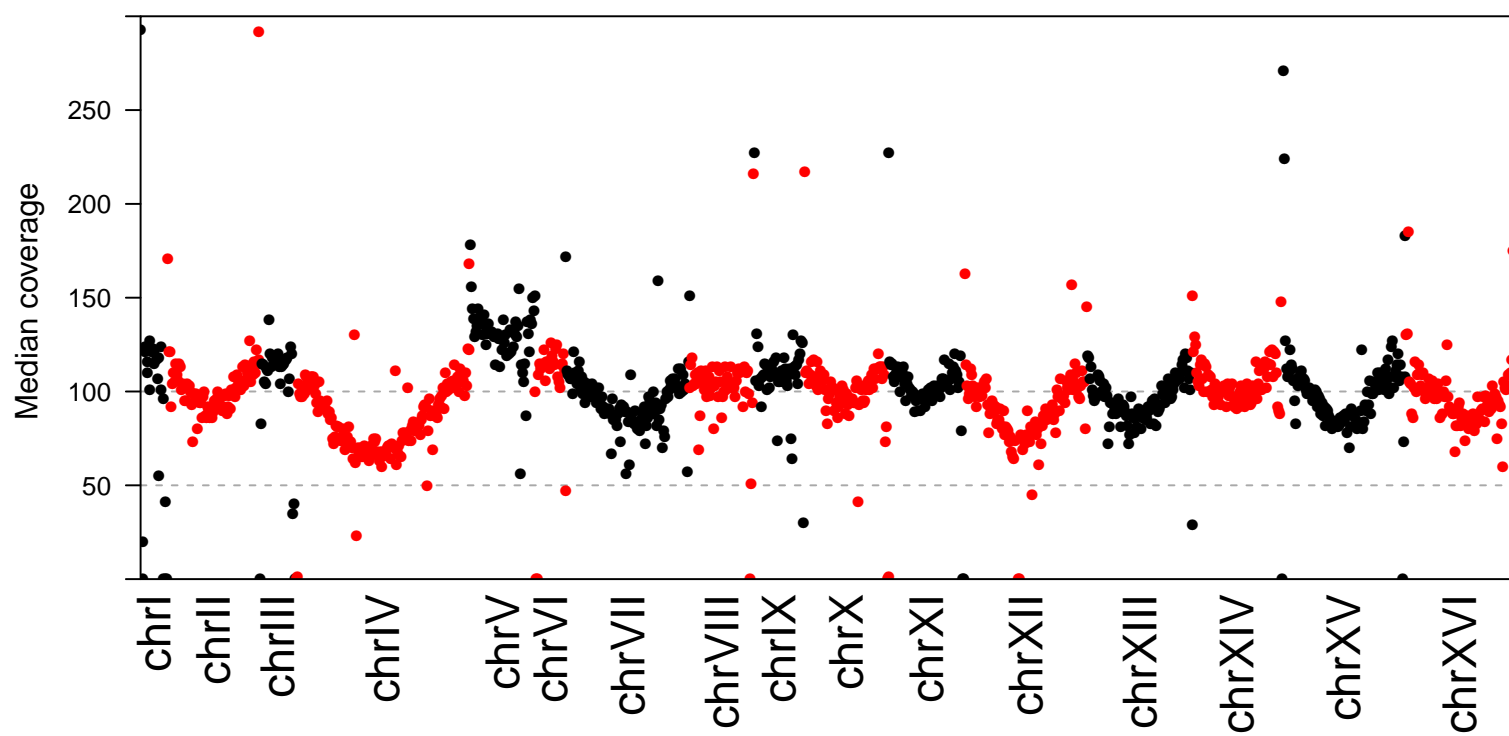

beer079

# Supplementary Figure S2

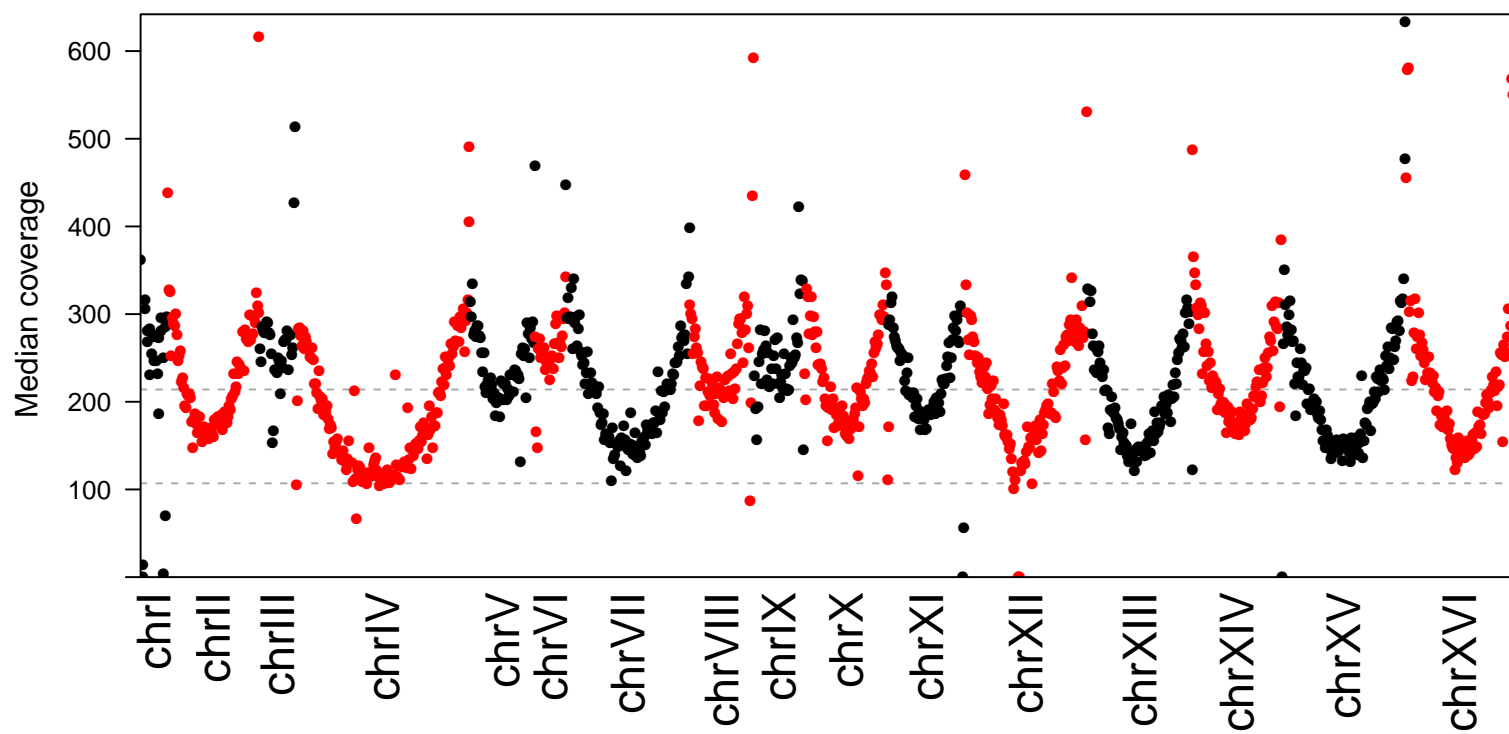

beer085

# Supplementary Figure S2

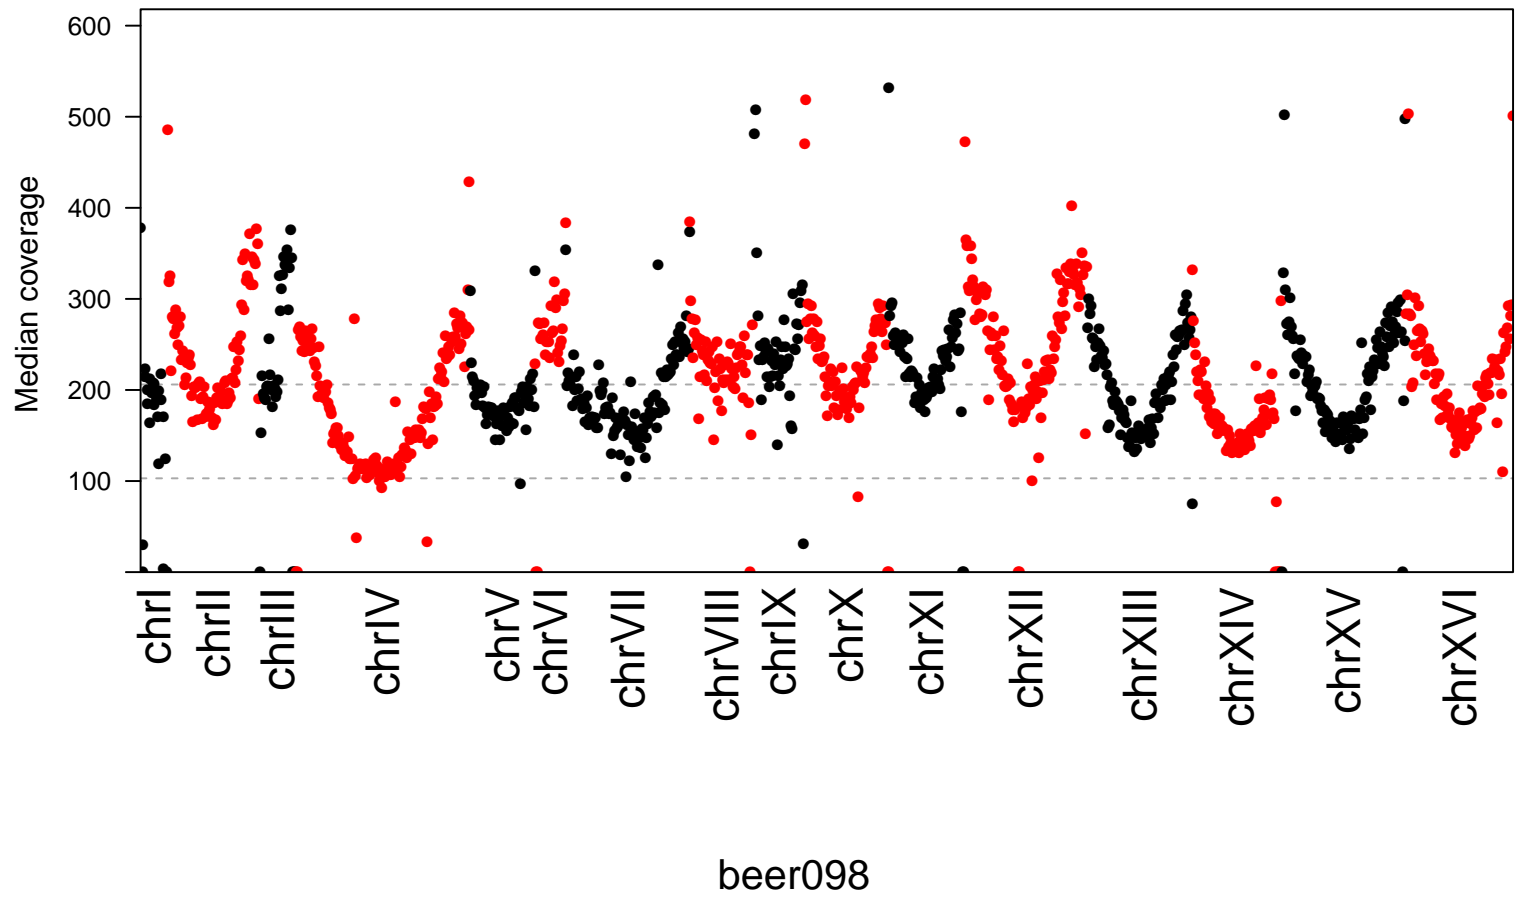

Supplementary Figure S2

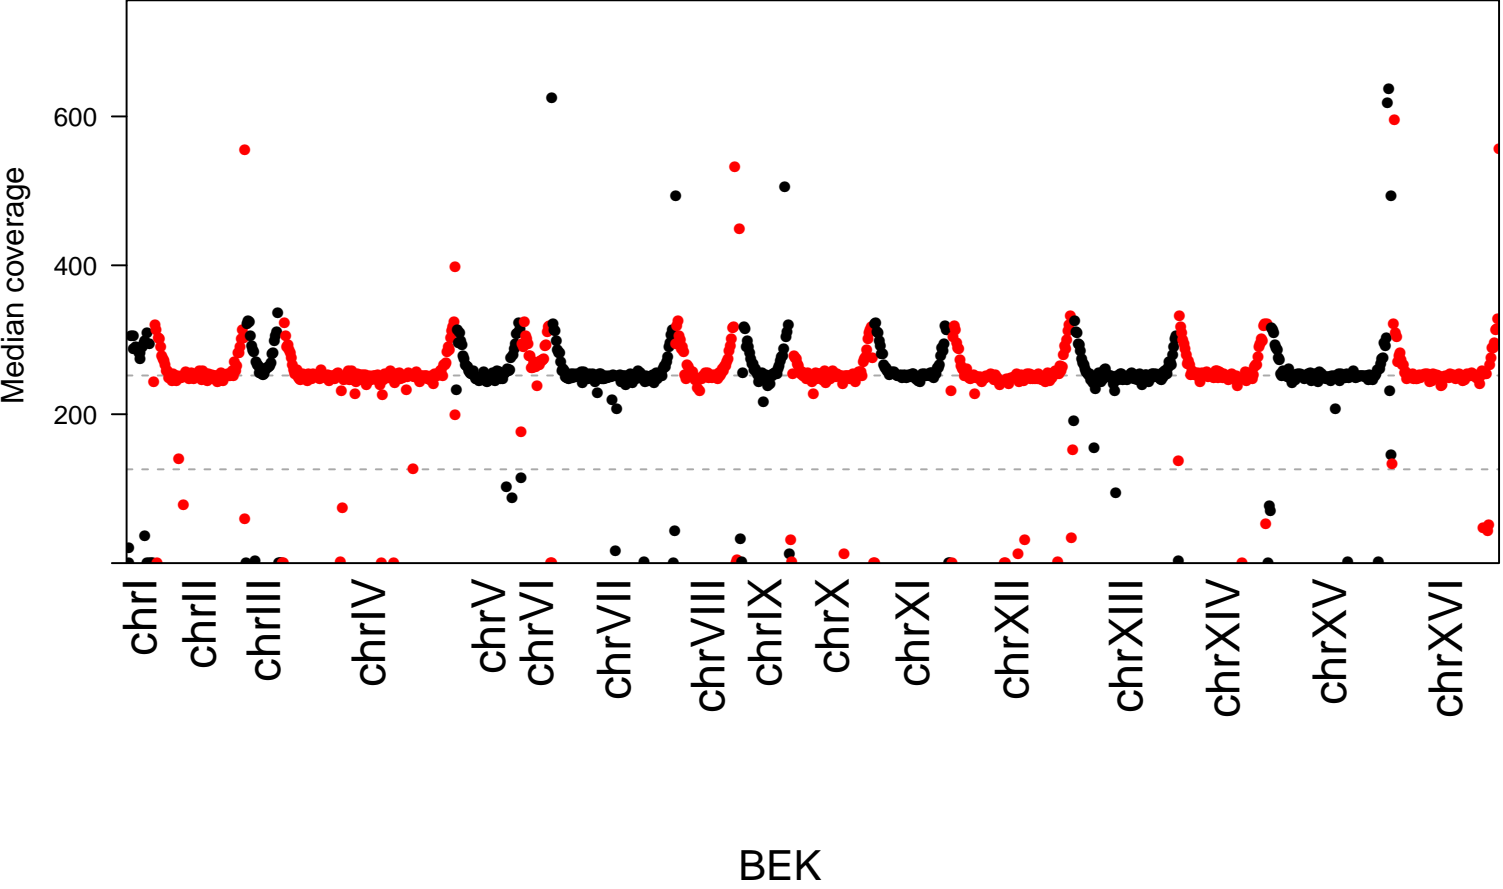

# Supplementary Figure S2

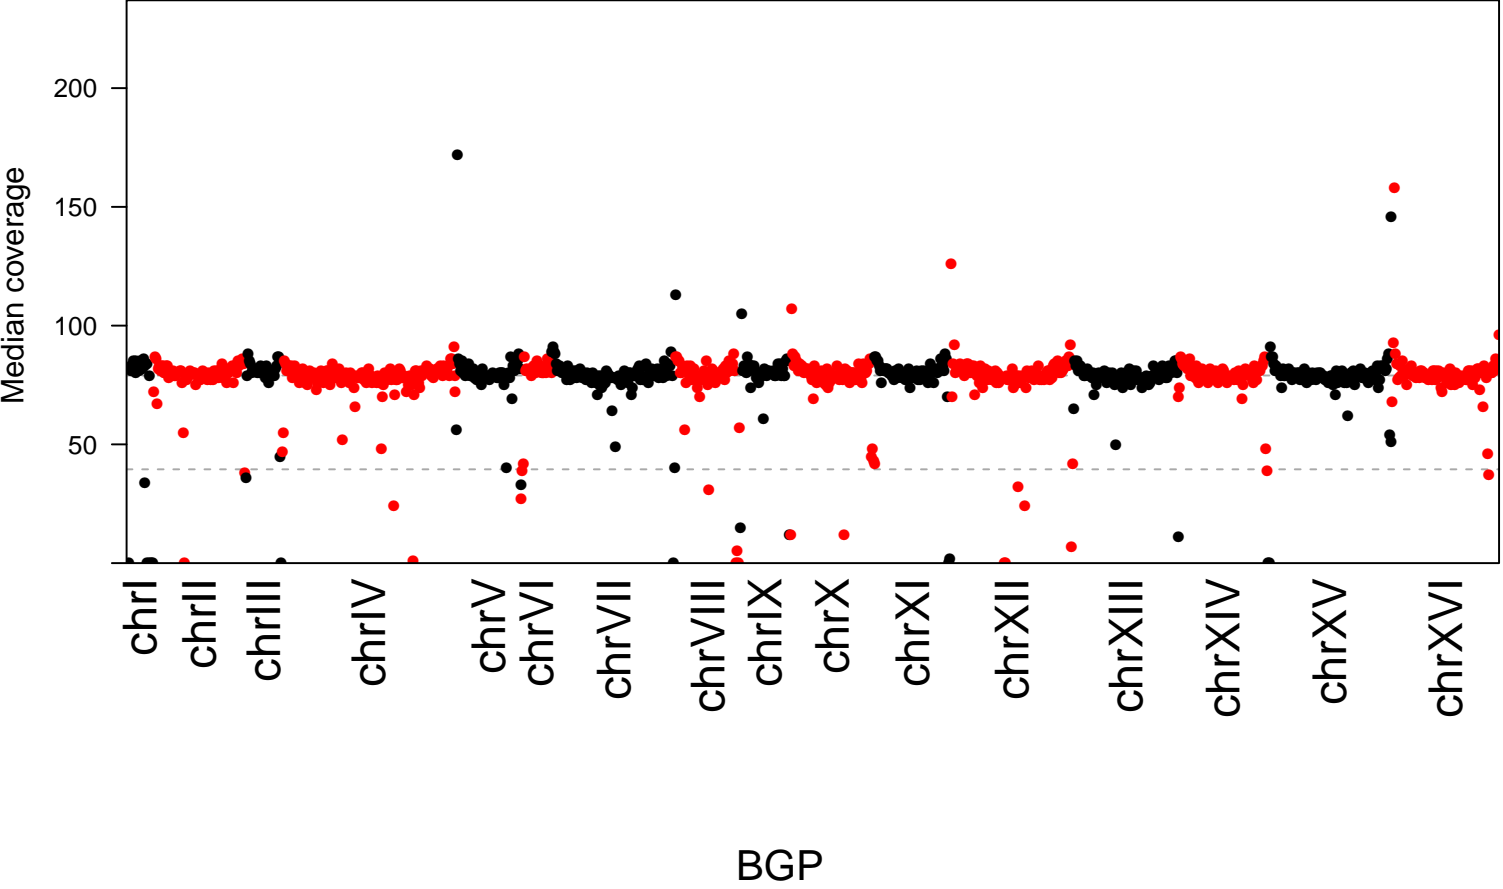



# Supplementary Figure S2

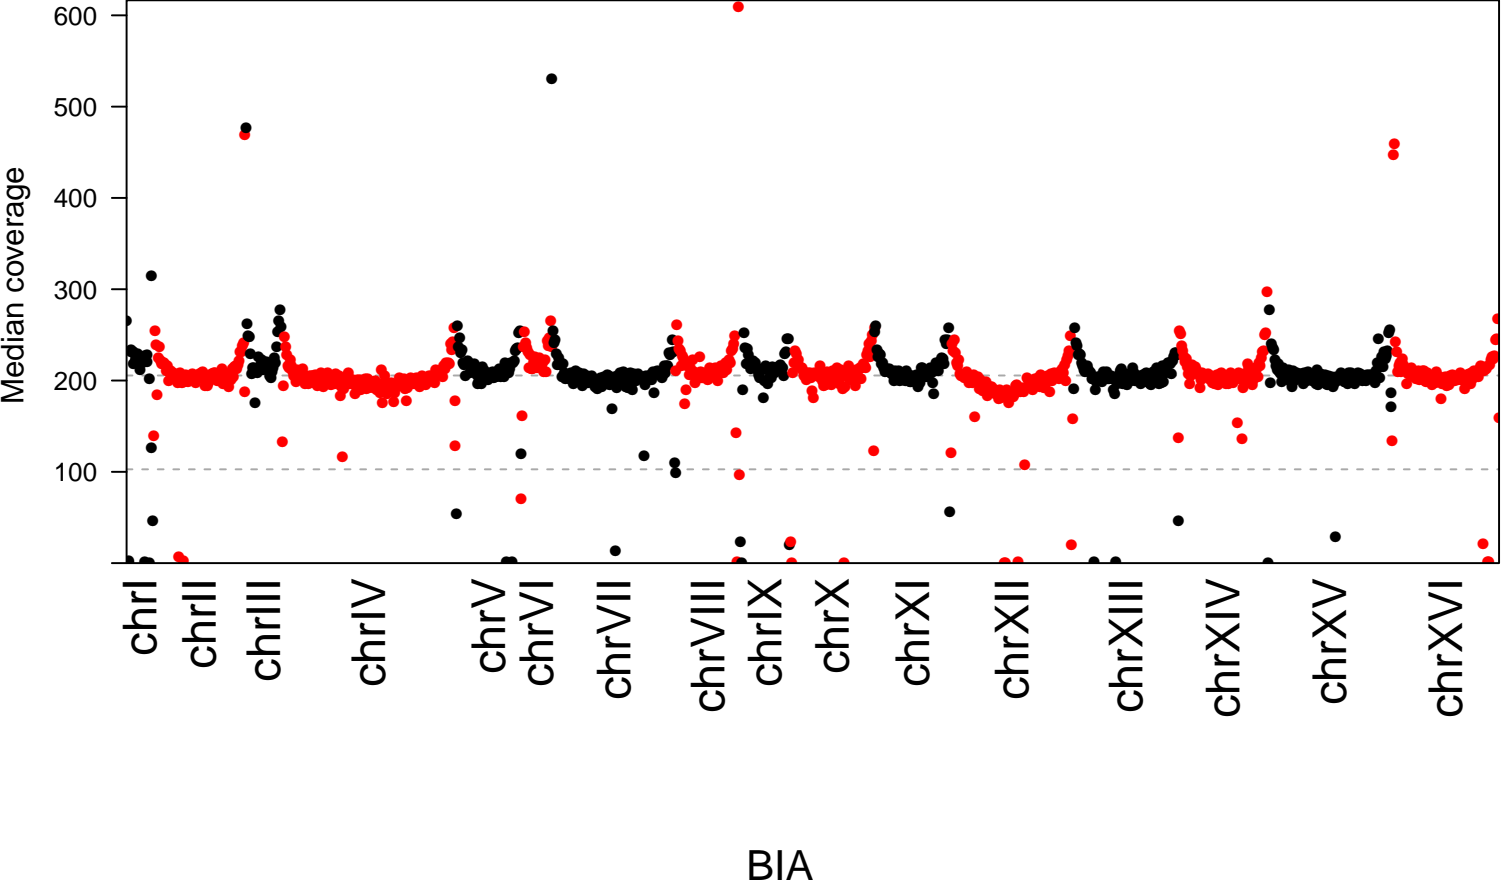

# Supplementary Figure S2

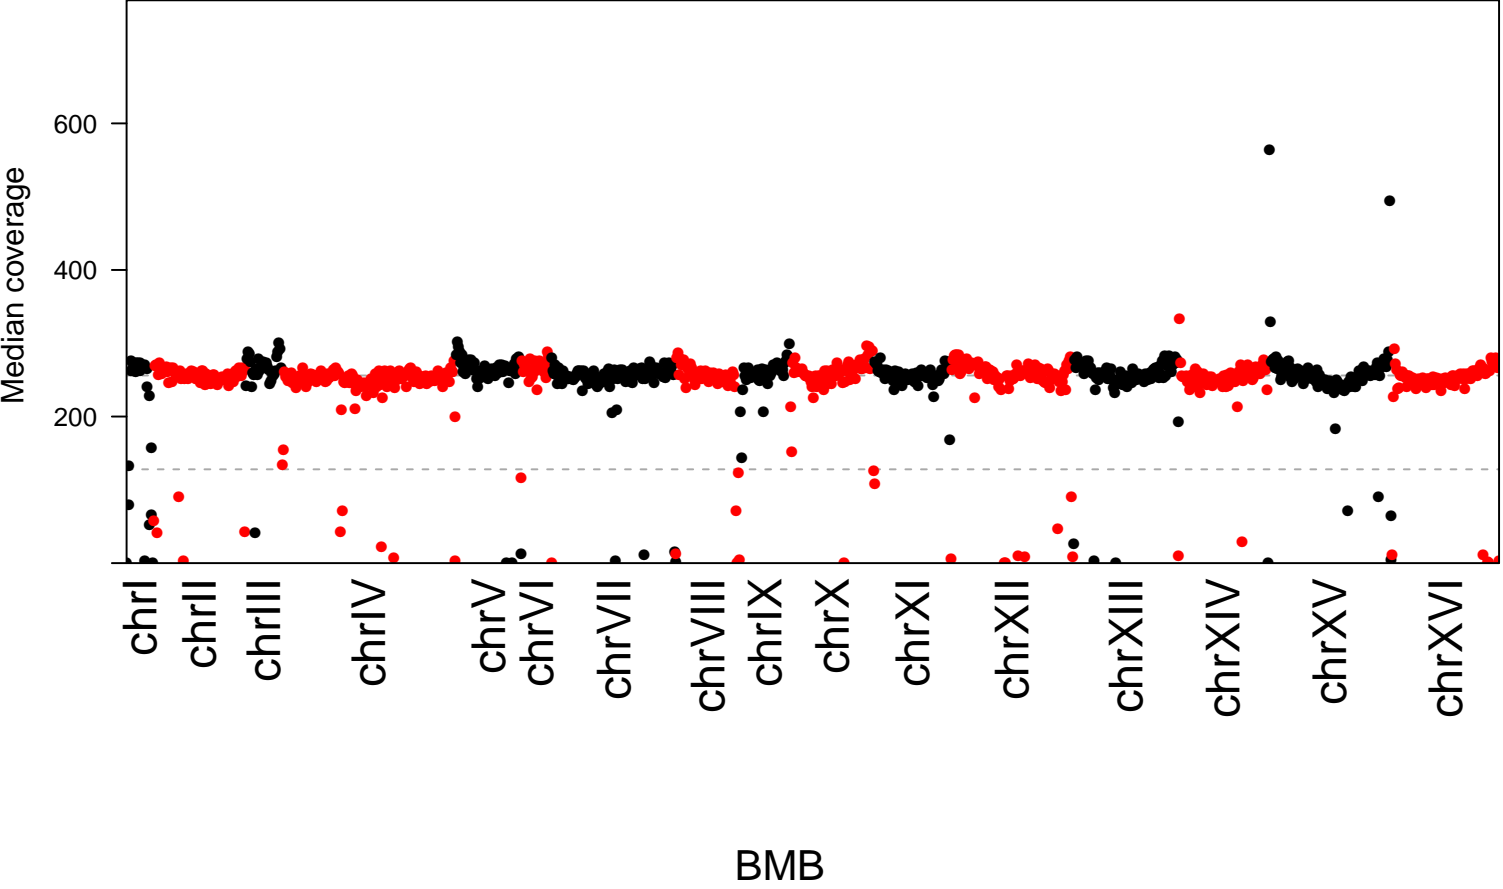

## Supplementary Figure S2

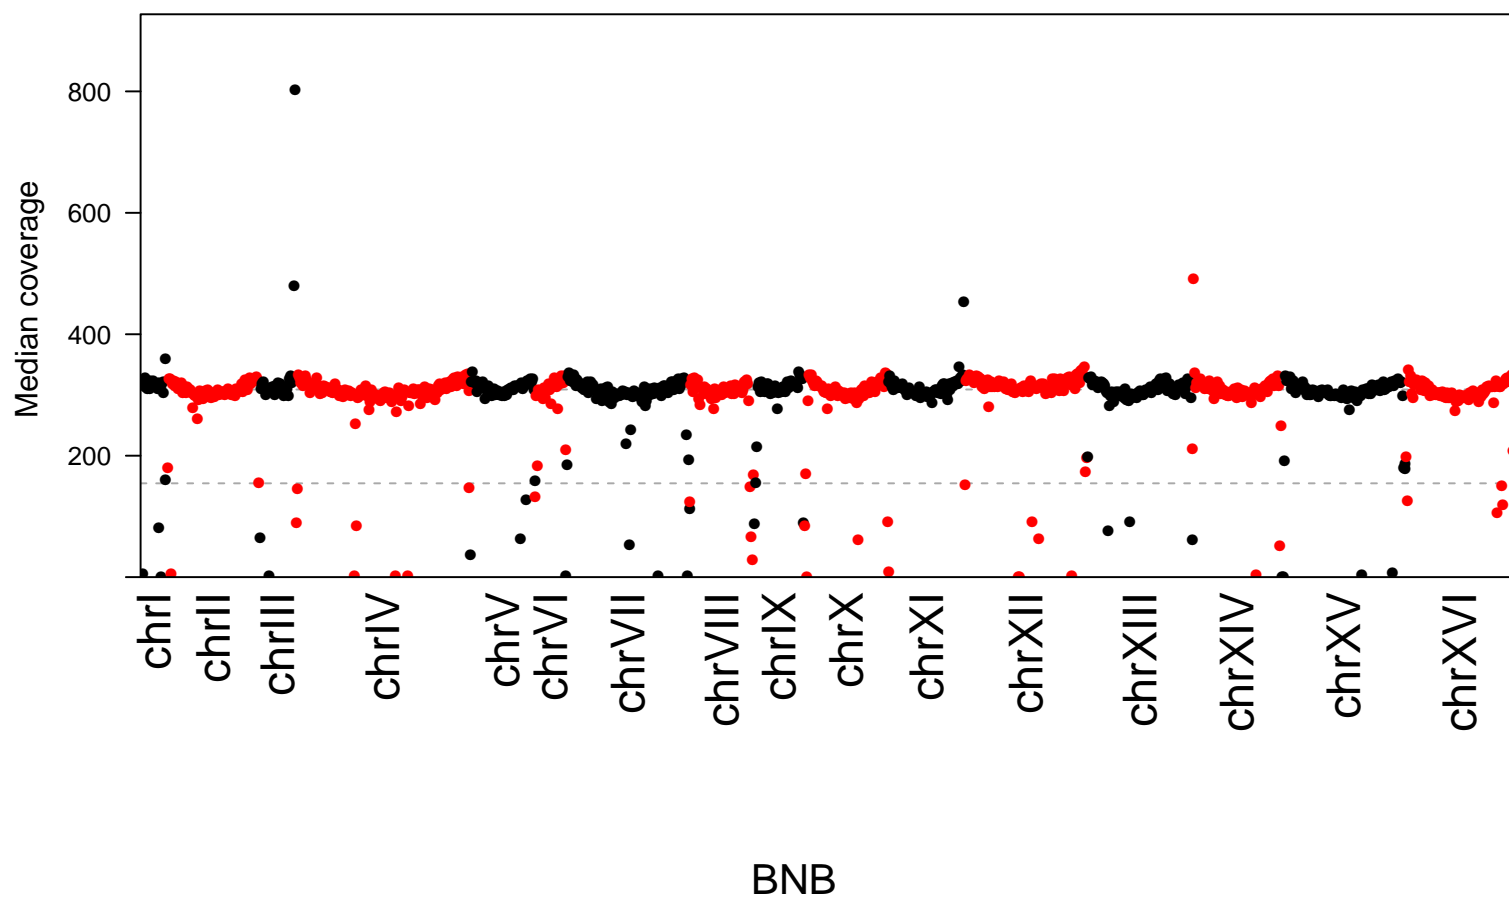

Supplementary Figure S2

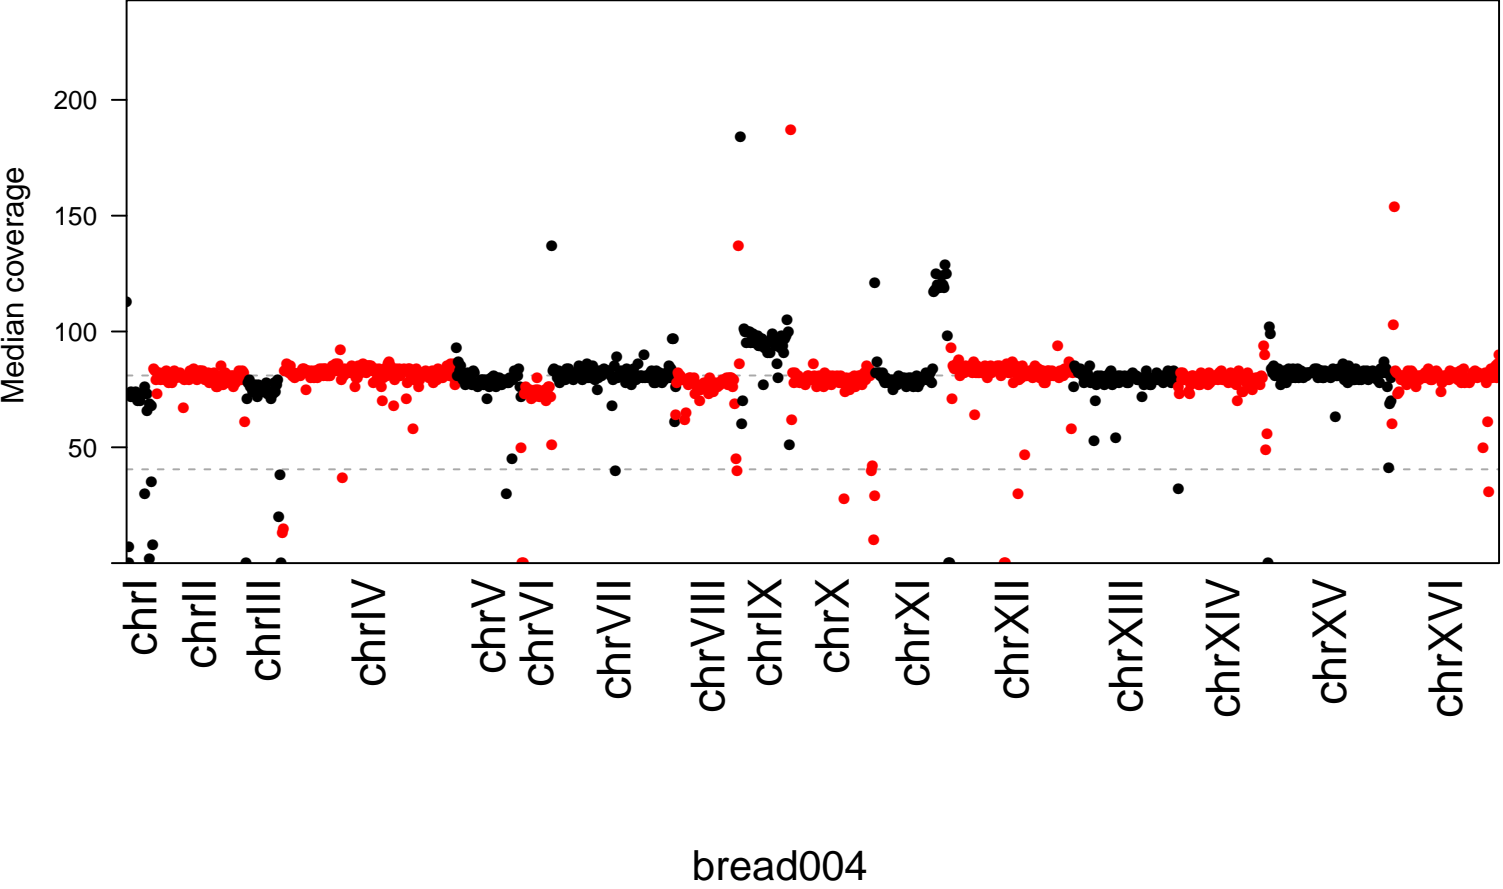

# Supplementary Figure S2

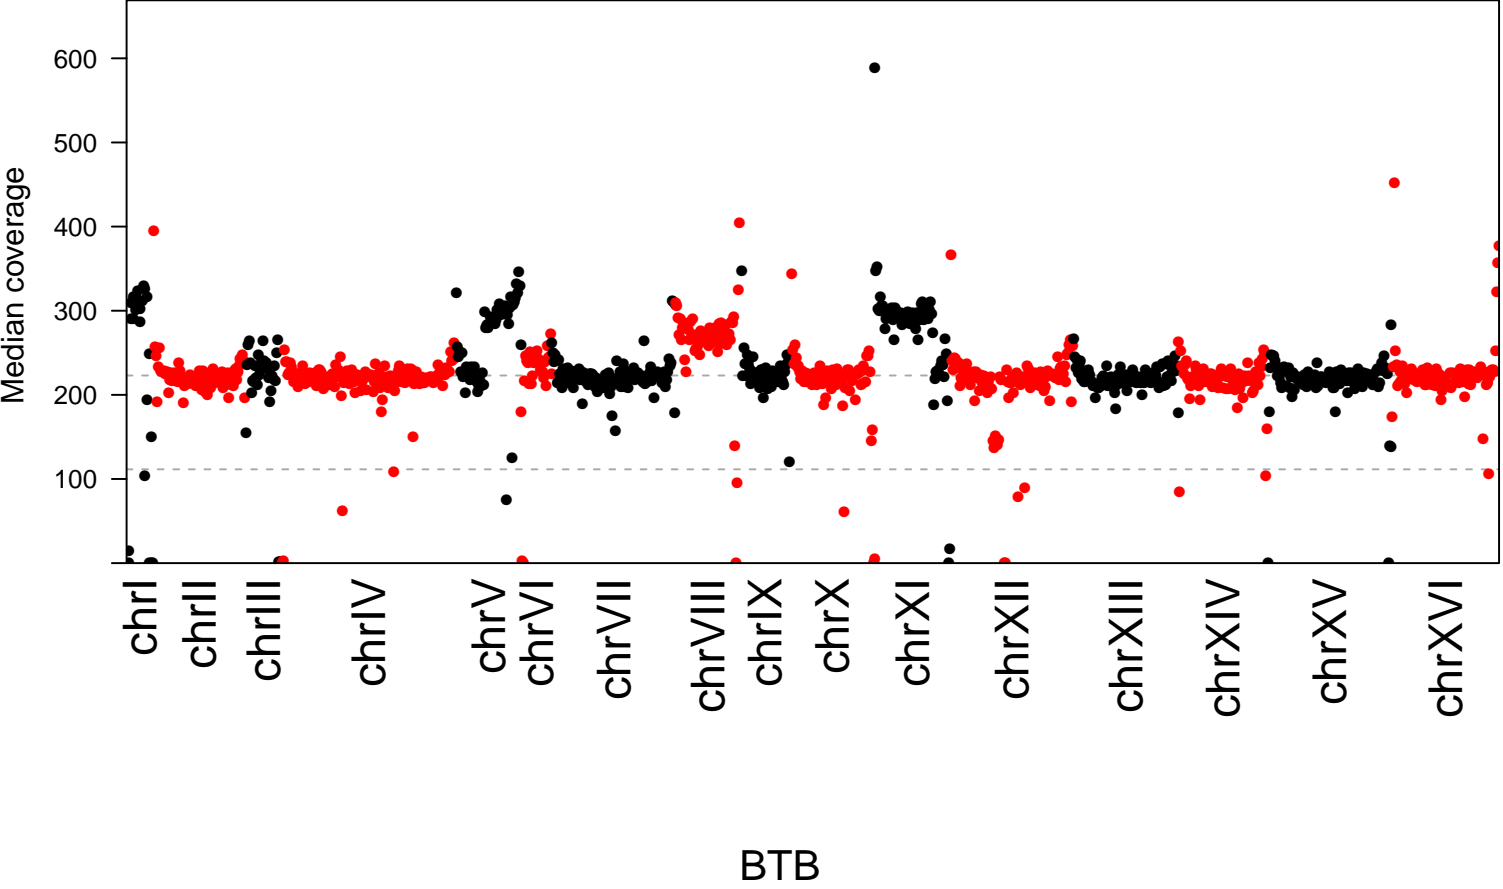

## Supplementary Figure S2

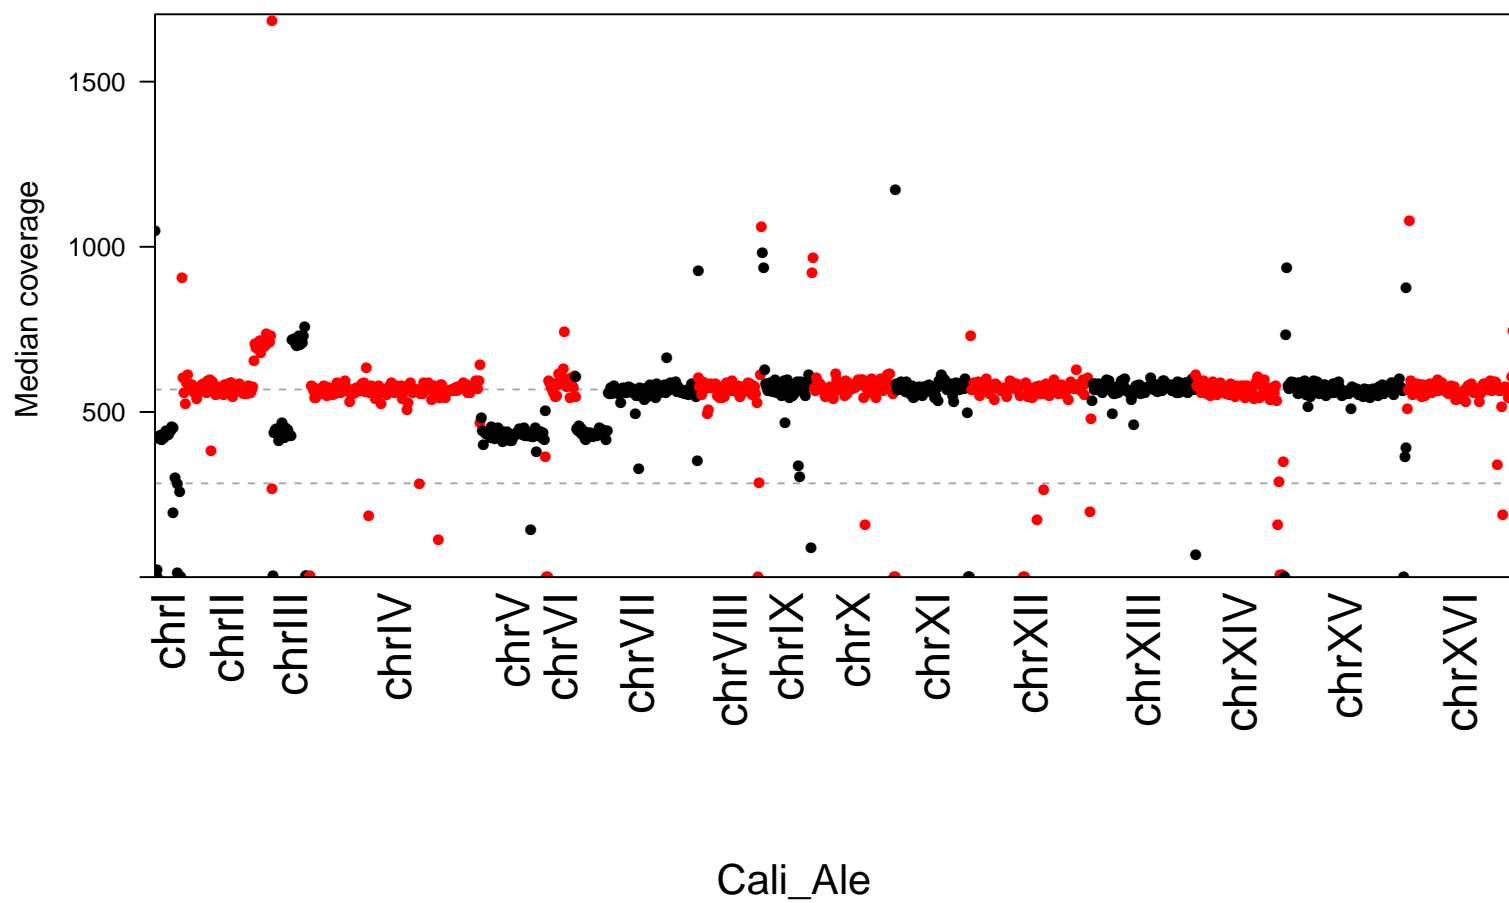

# Supplementary Figure S2

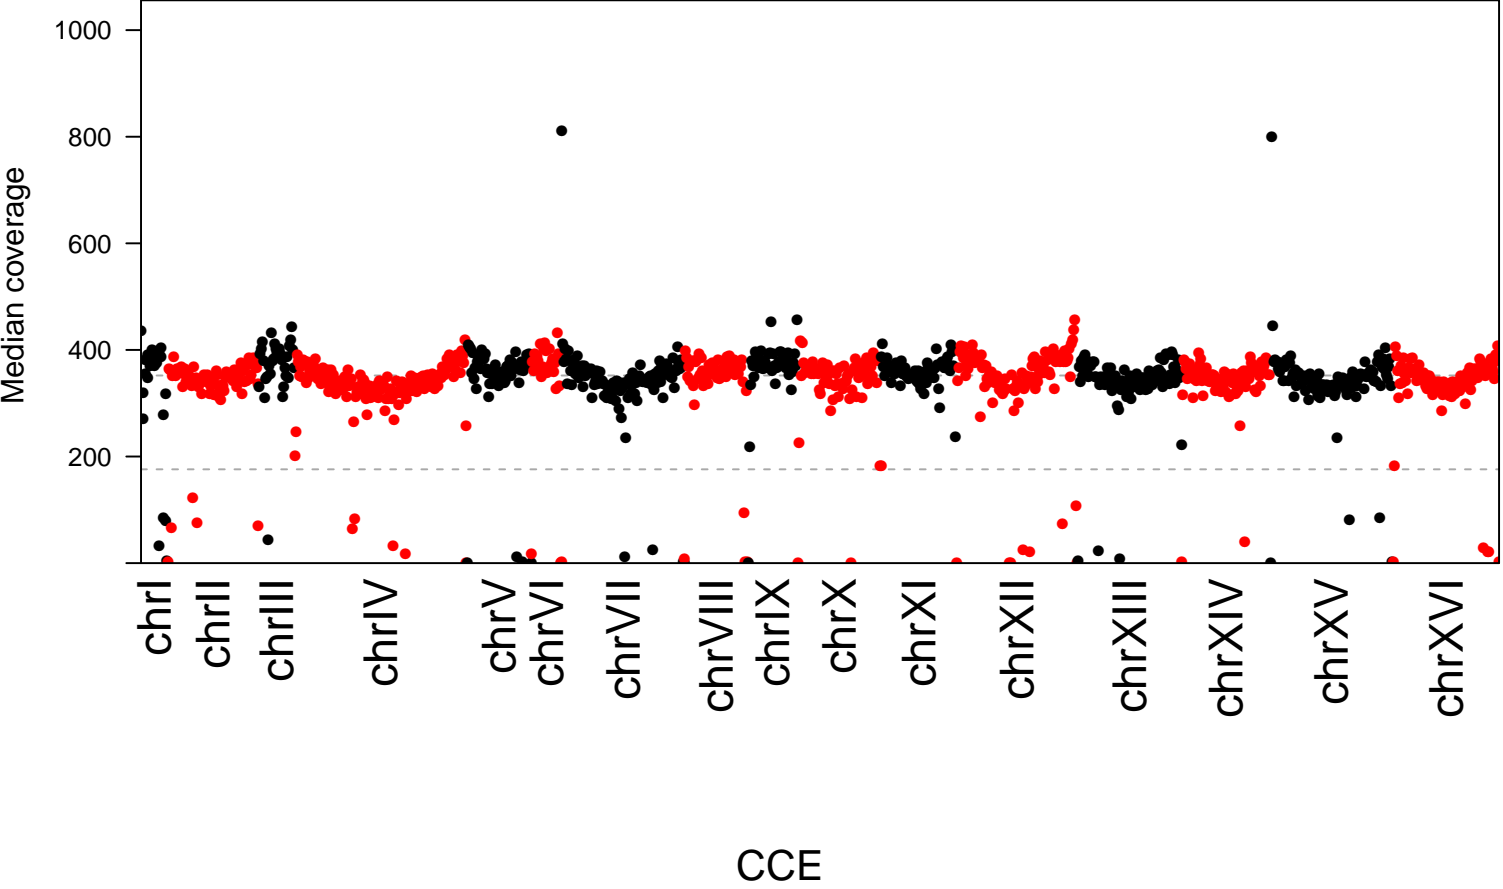

# Supplementary Figure S2

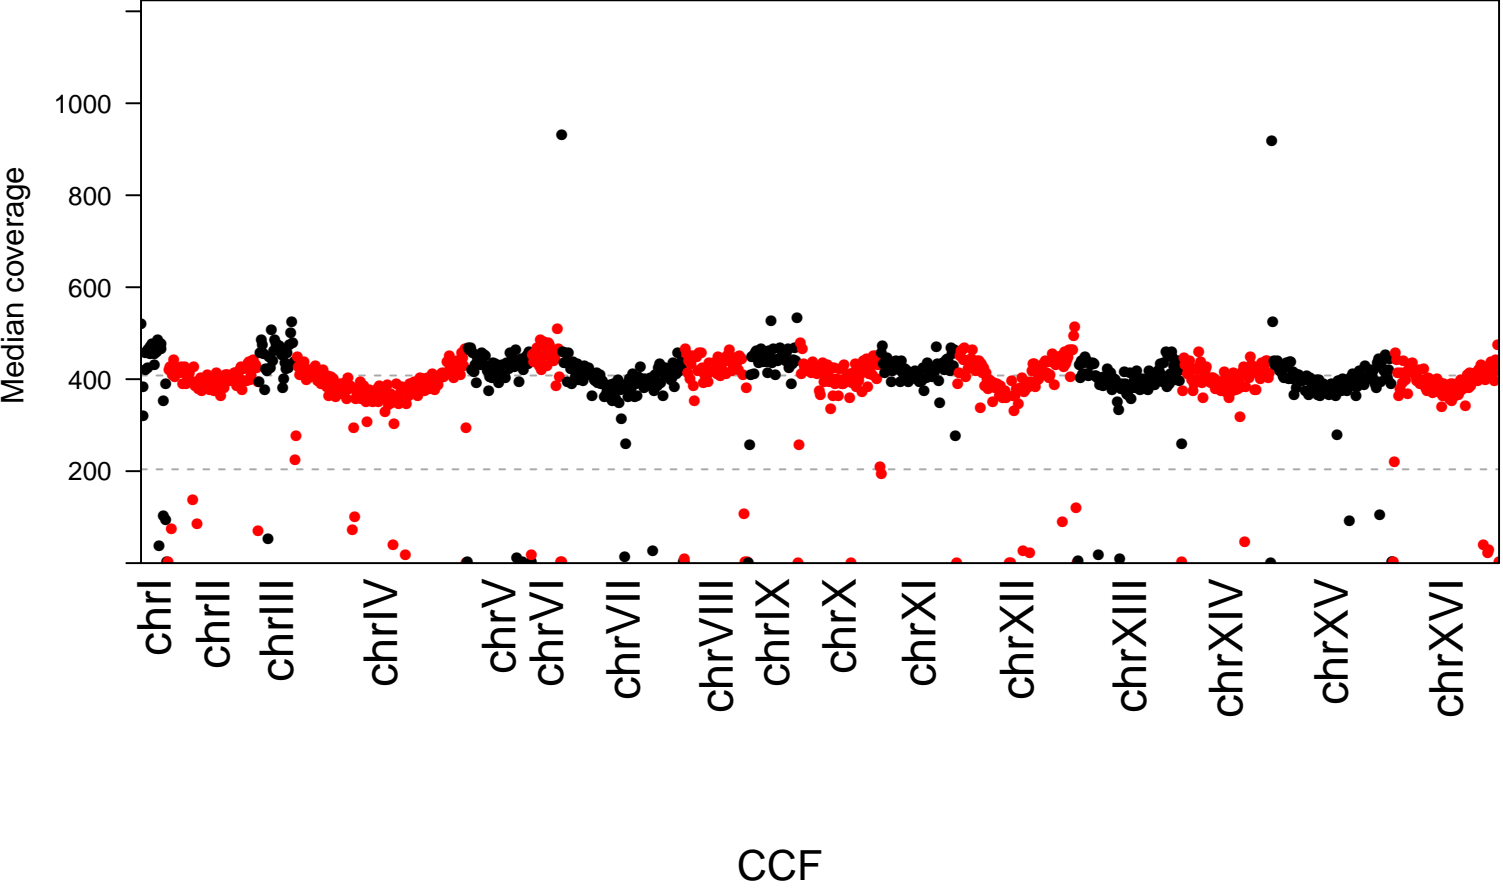



# Supplementary Figure S2

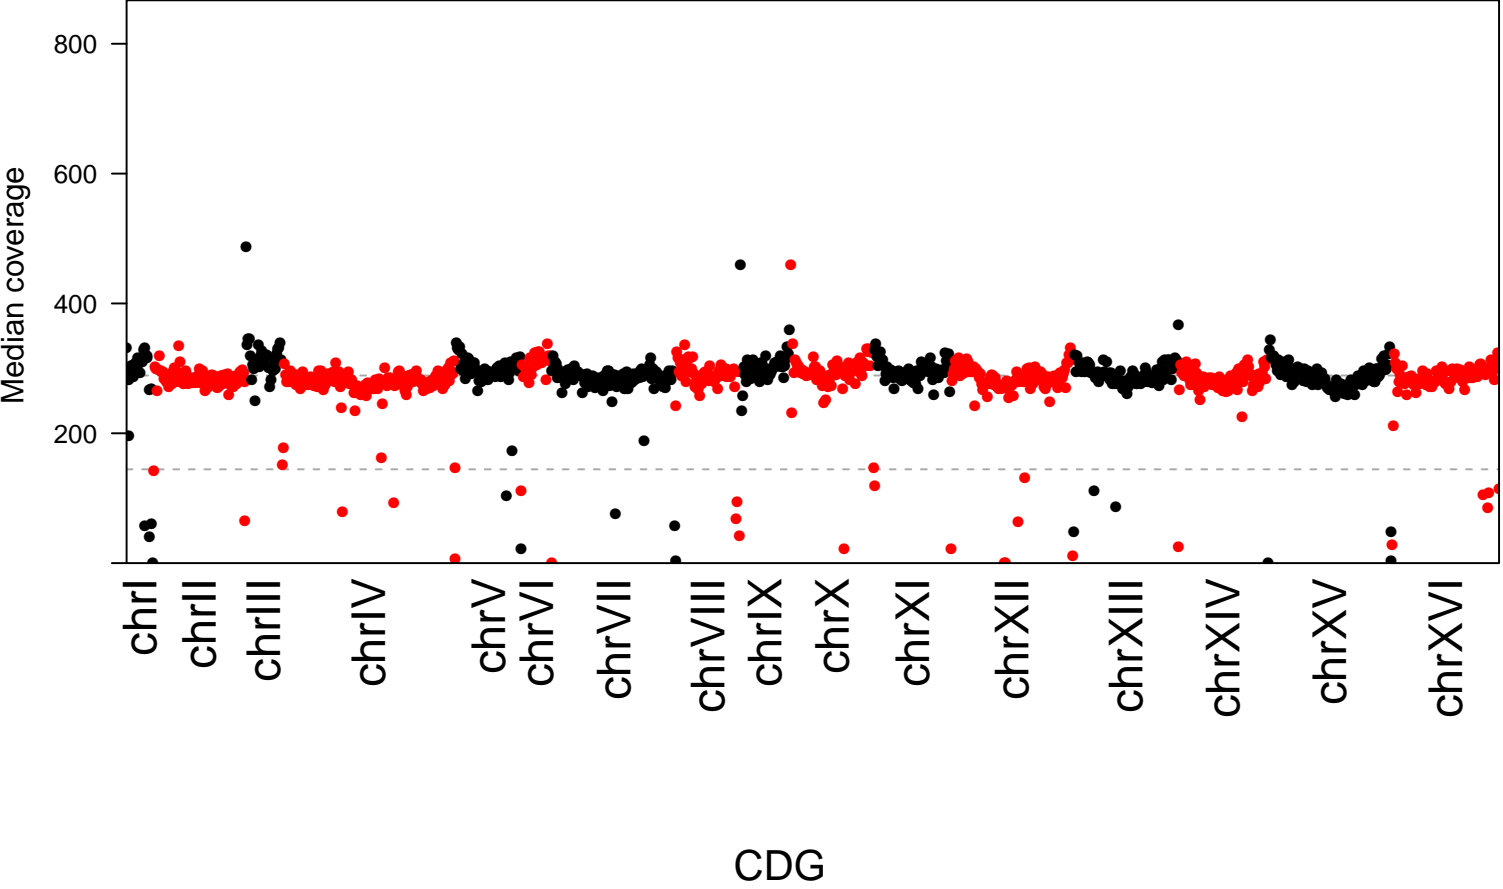

## Supplementary Figure S2

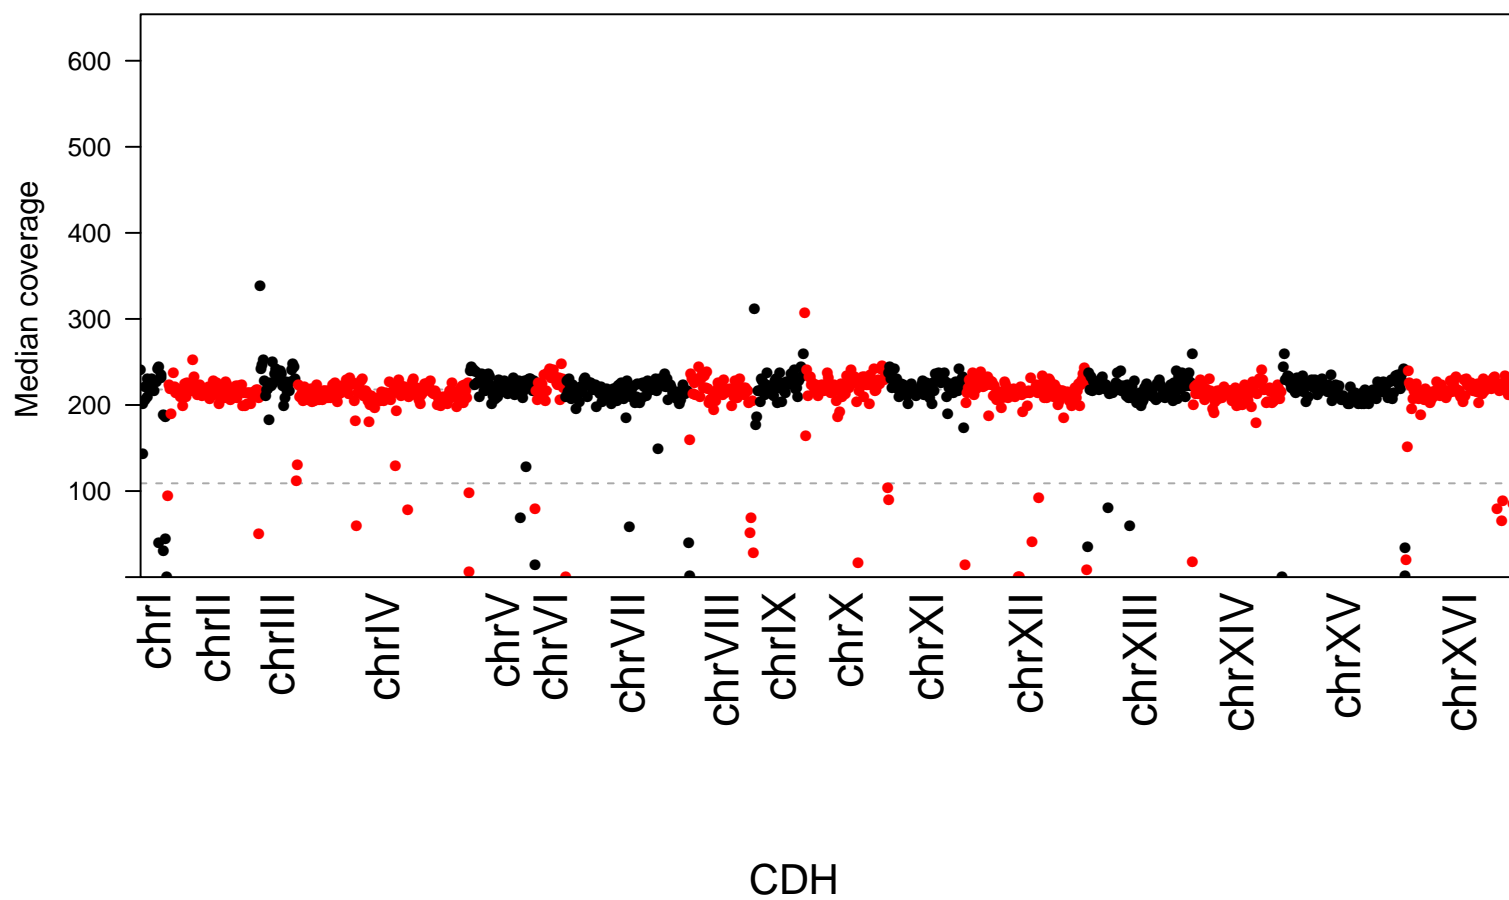

## Supplementary Figure S2

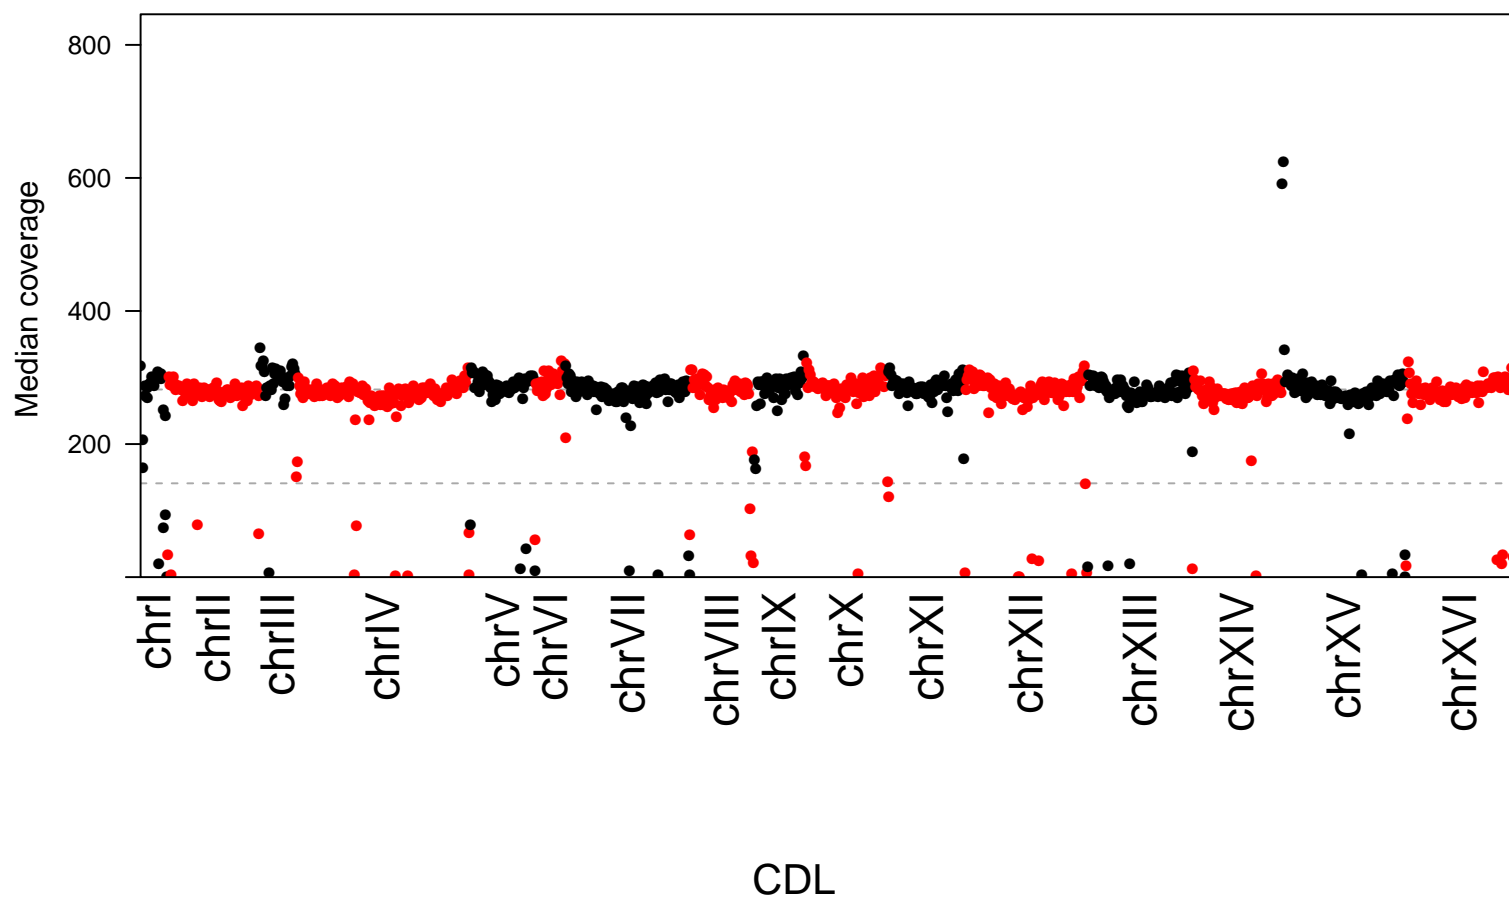

# Supplementary Figure S2

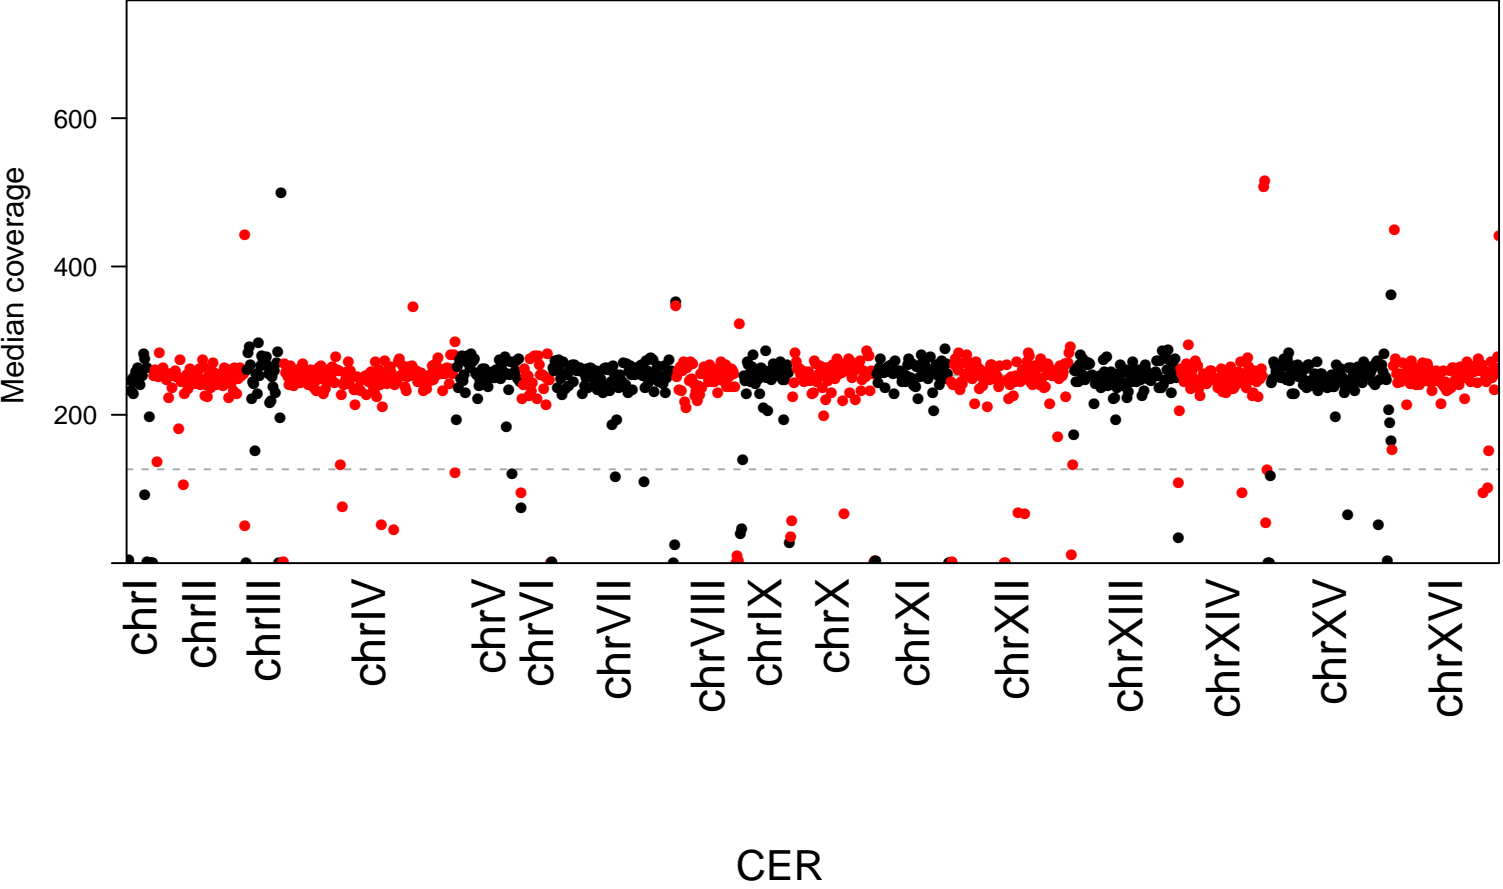

Supplementary Figure S2

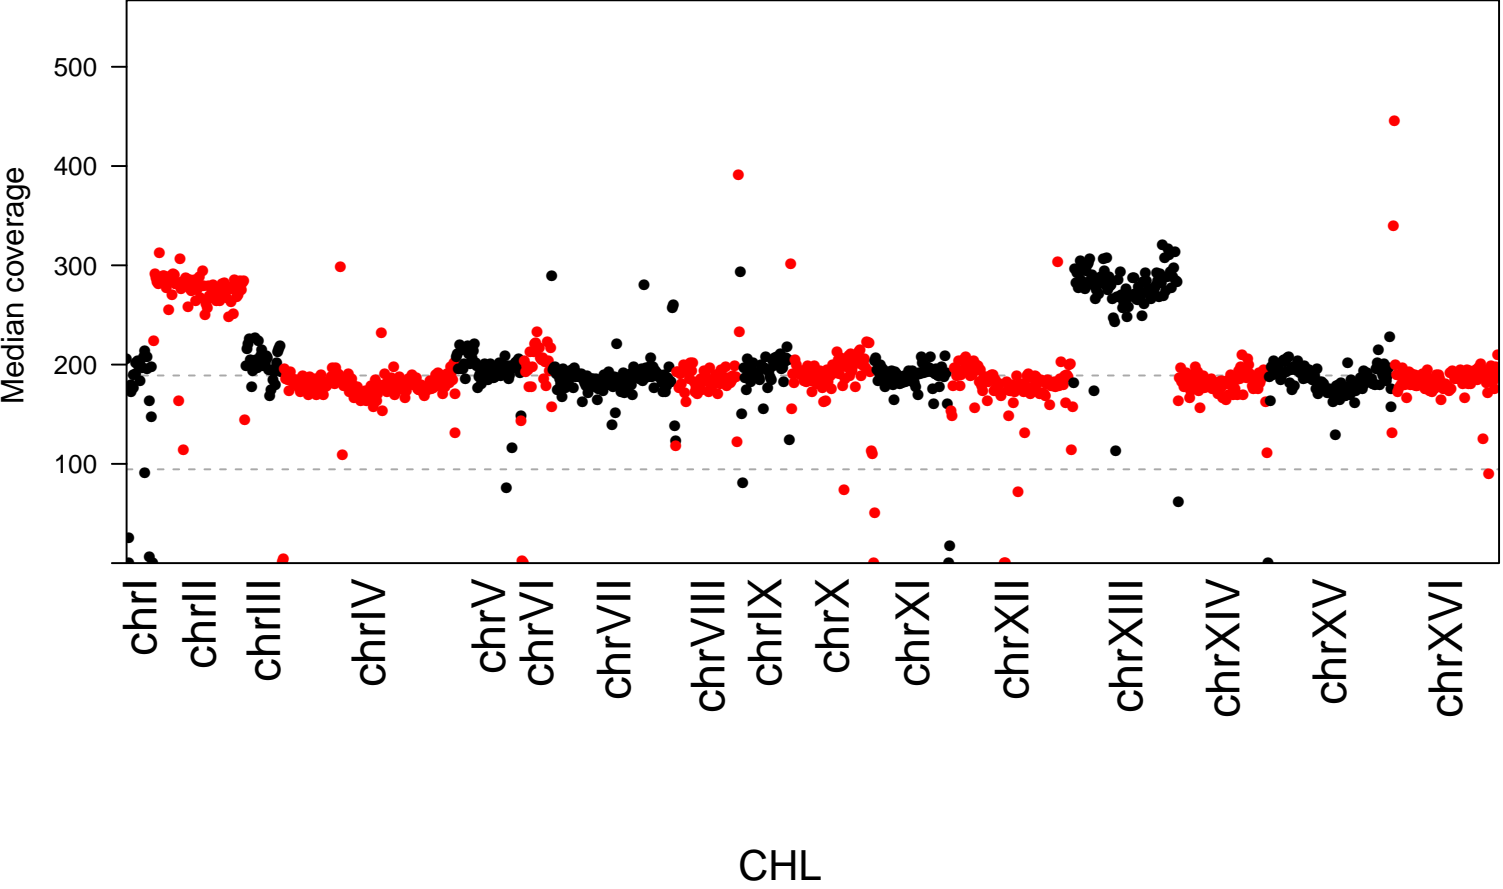

Supplementary Figure S2

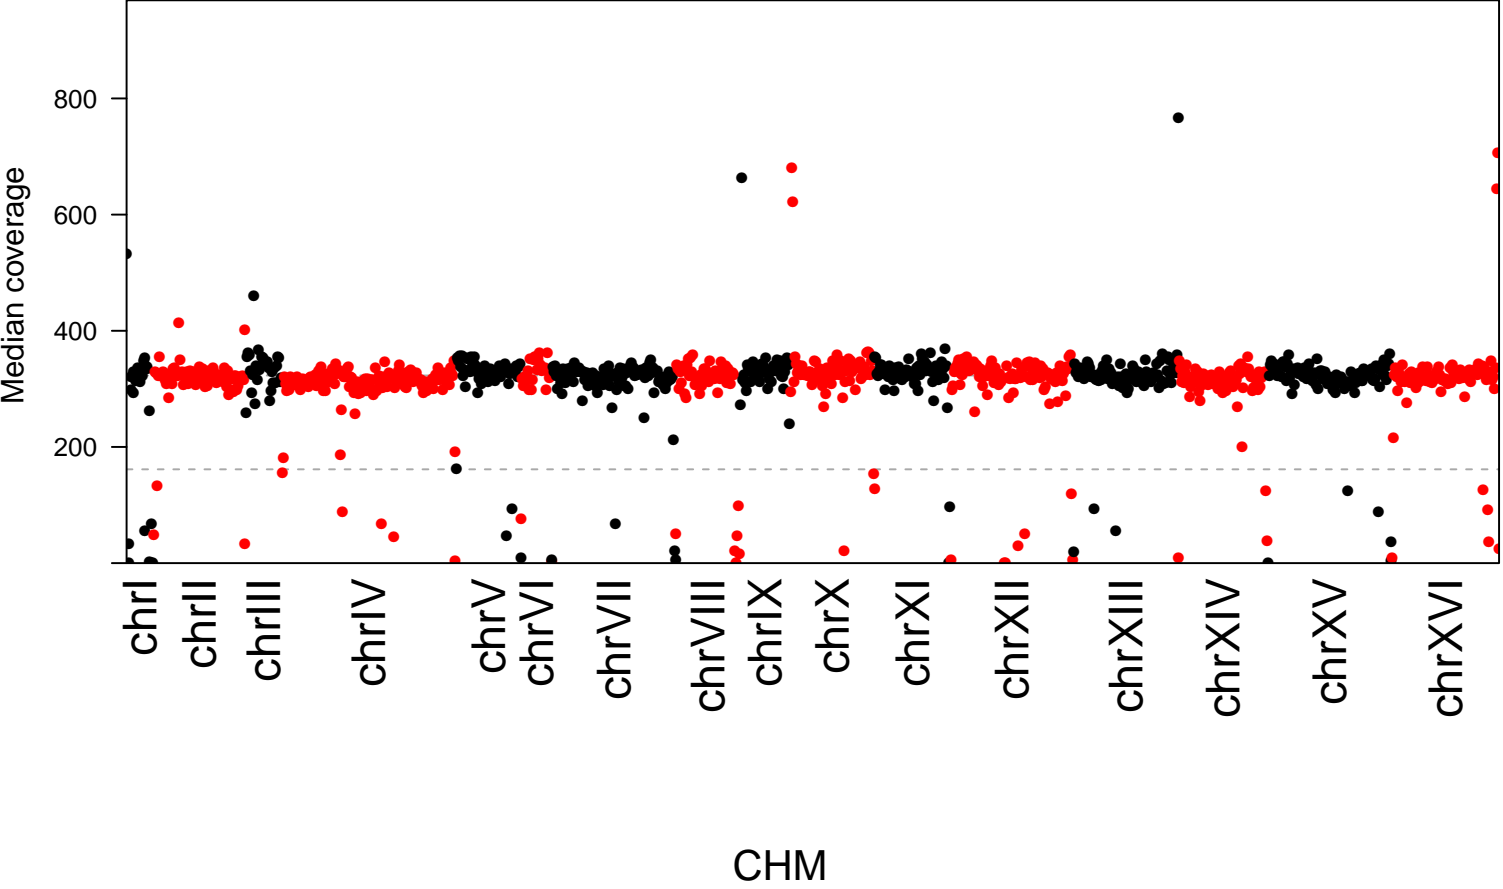

# Supplementary Figure S2

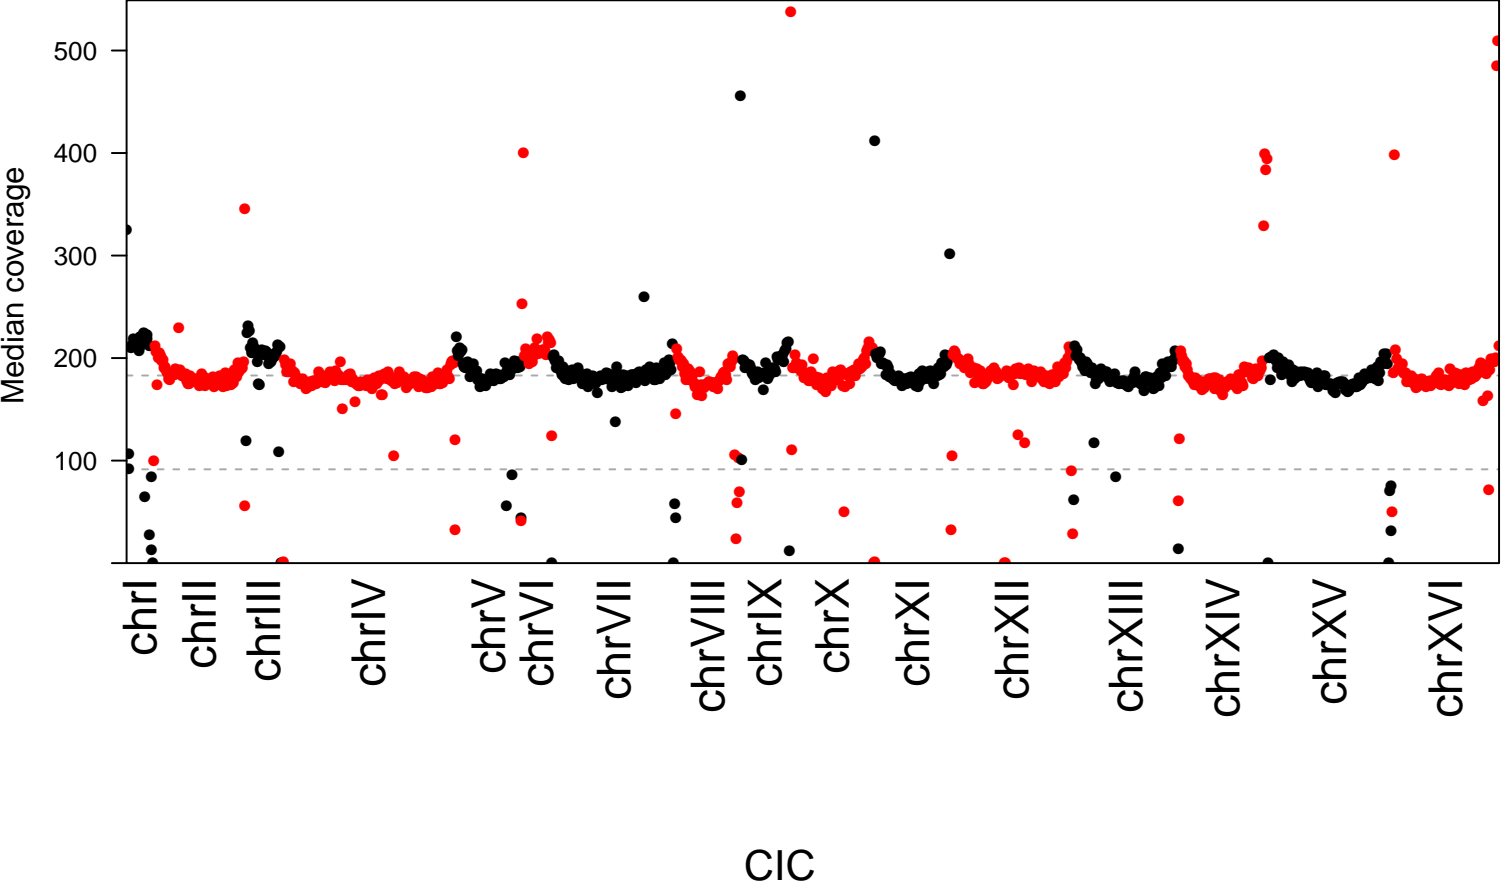

## Supplementary Figure S2

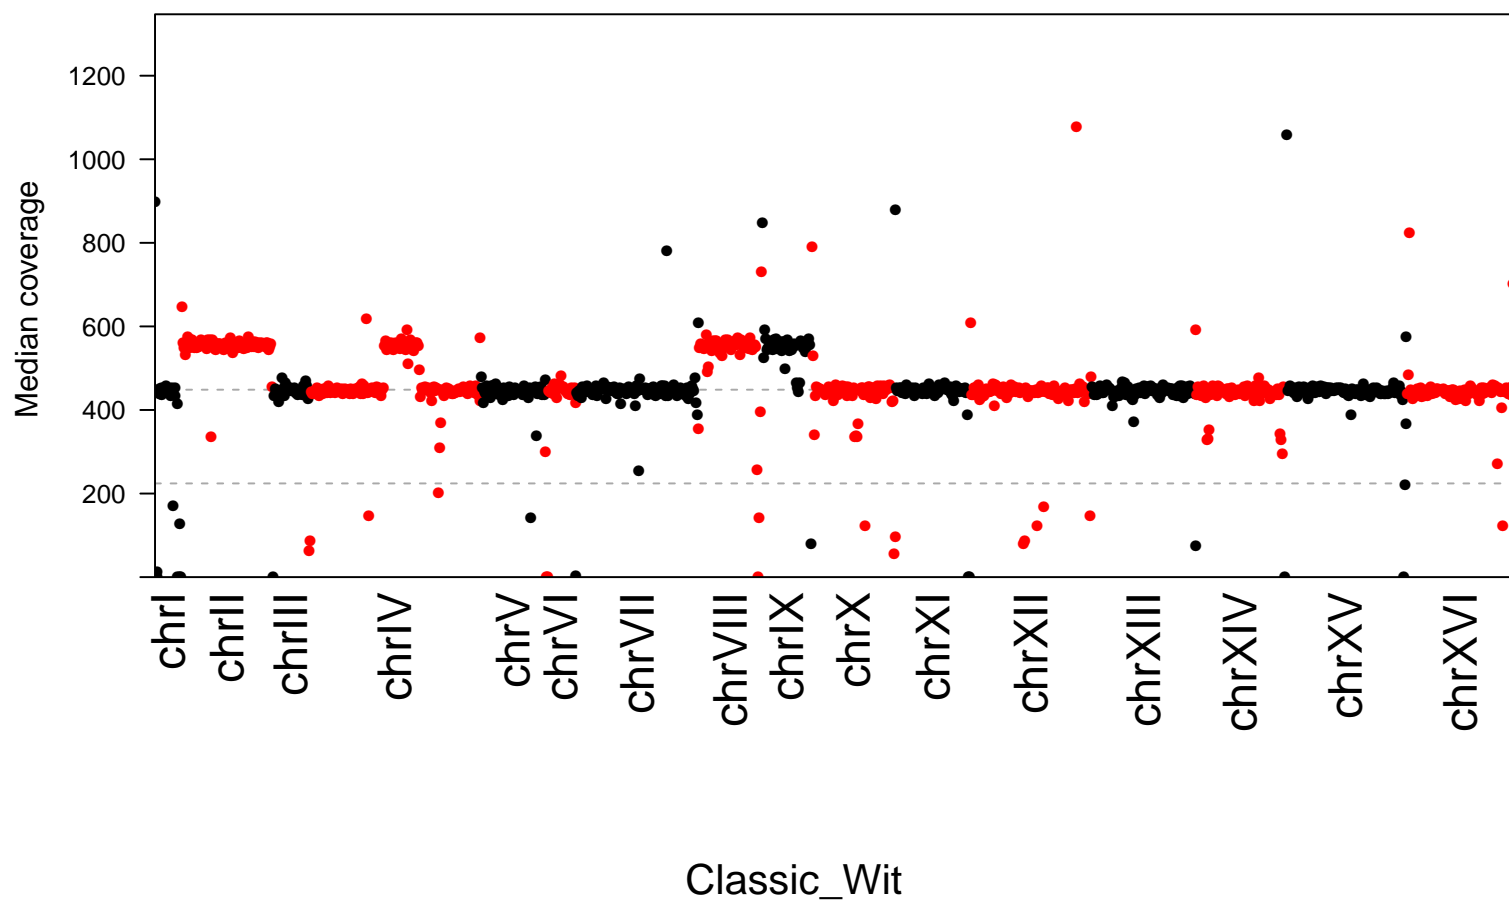



Supplementary Figure S2

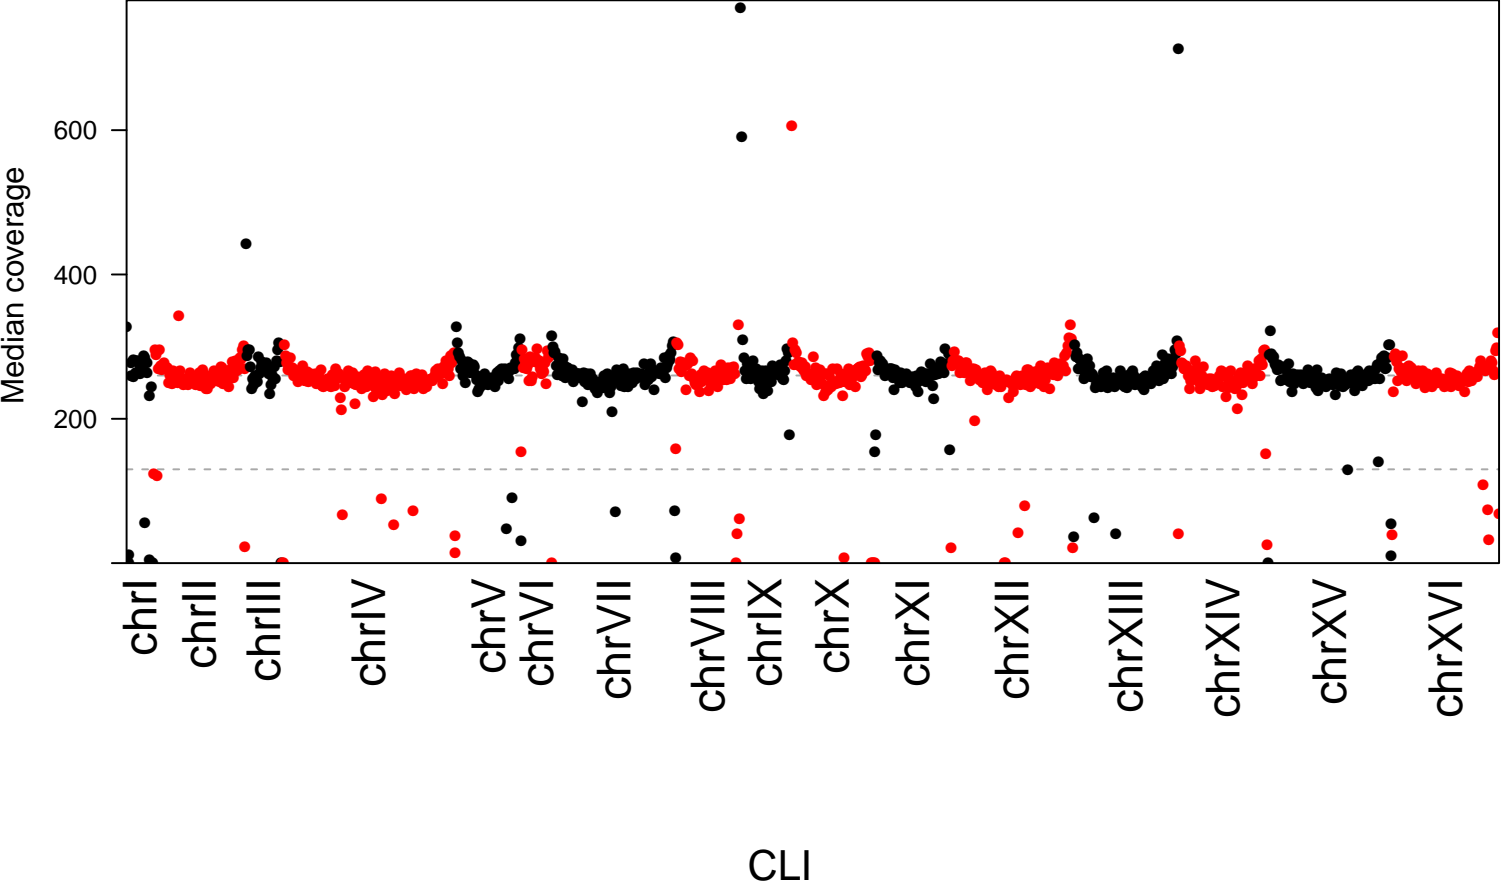

# Supplementary Figure S2

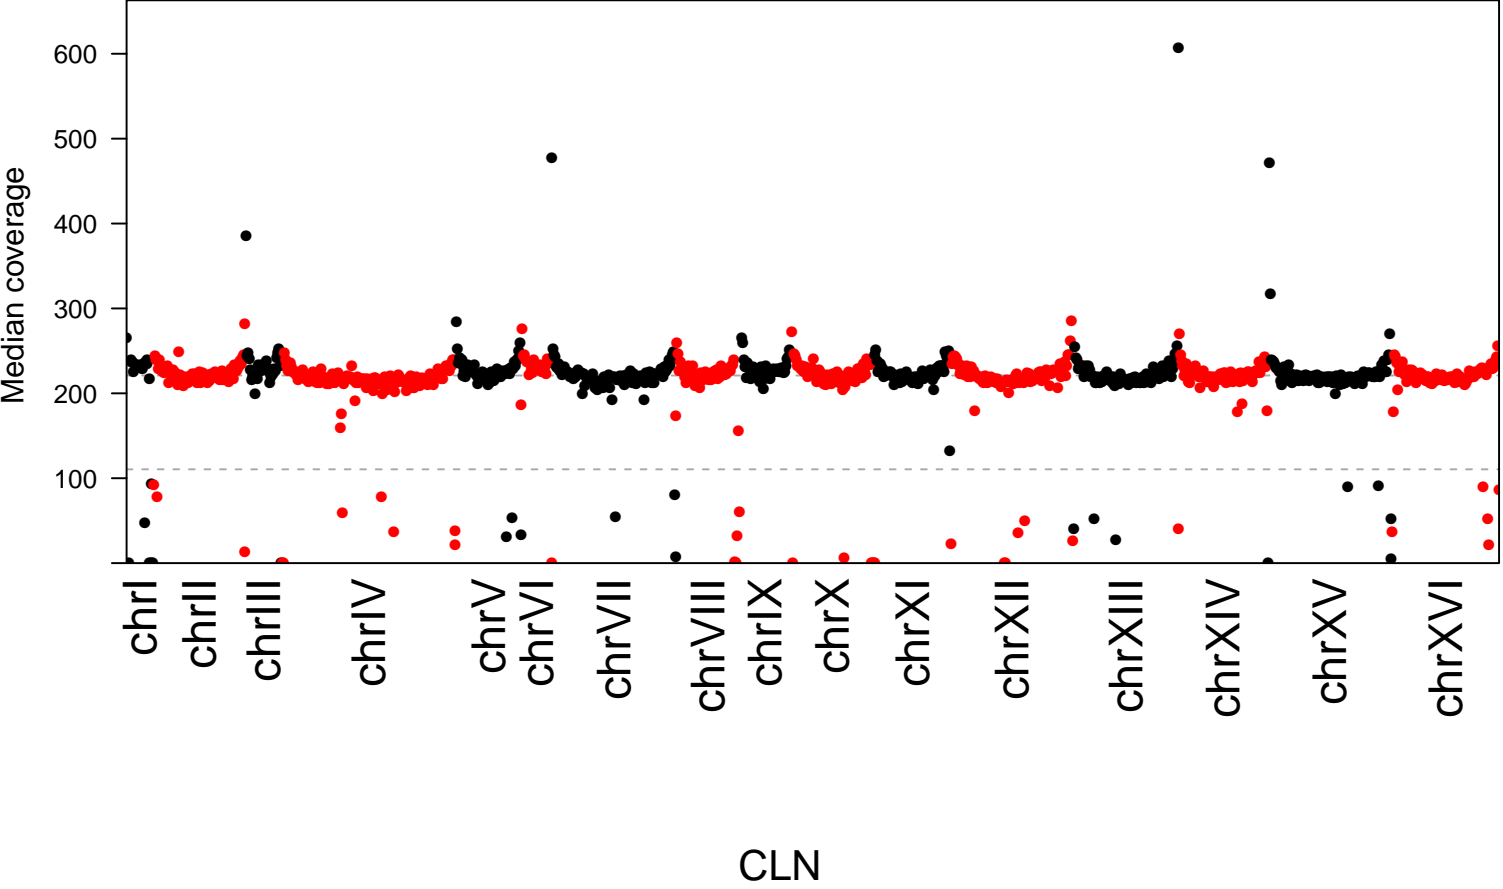

Supplementary Figure S2

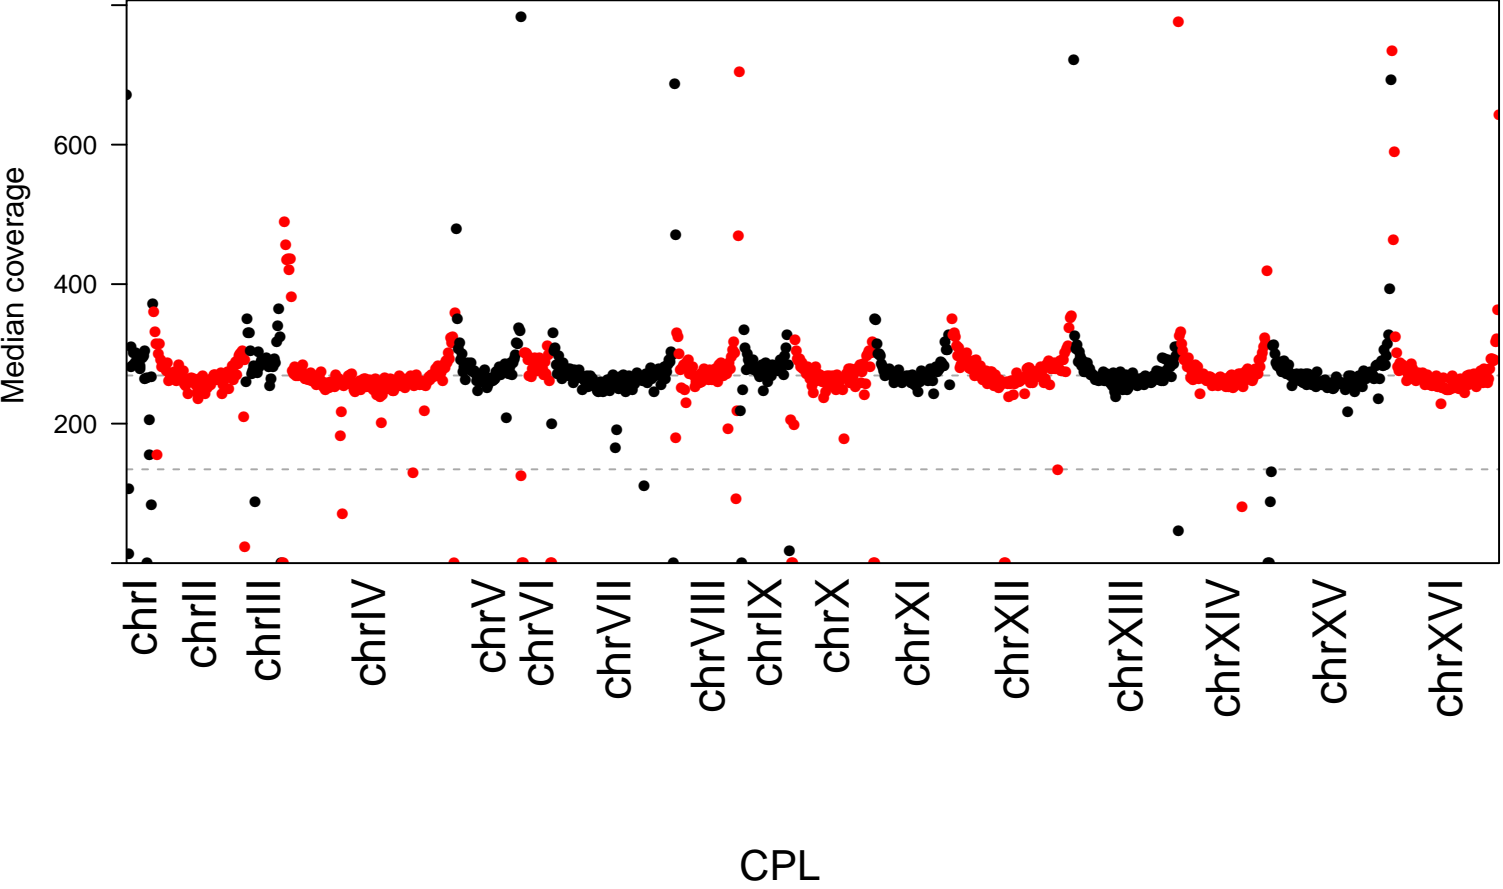

# Supplementary Figure S2

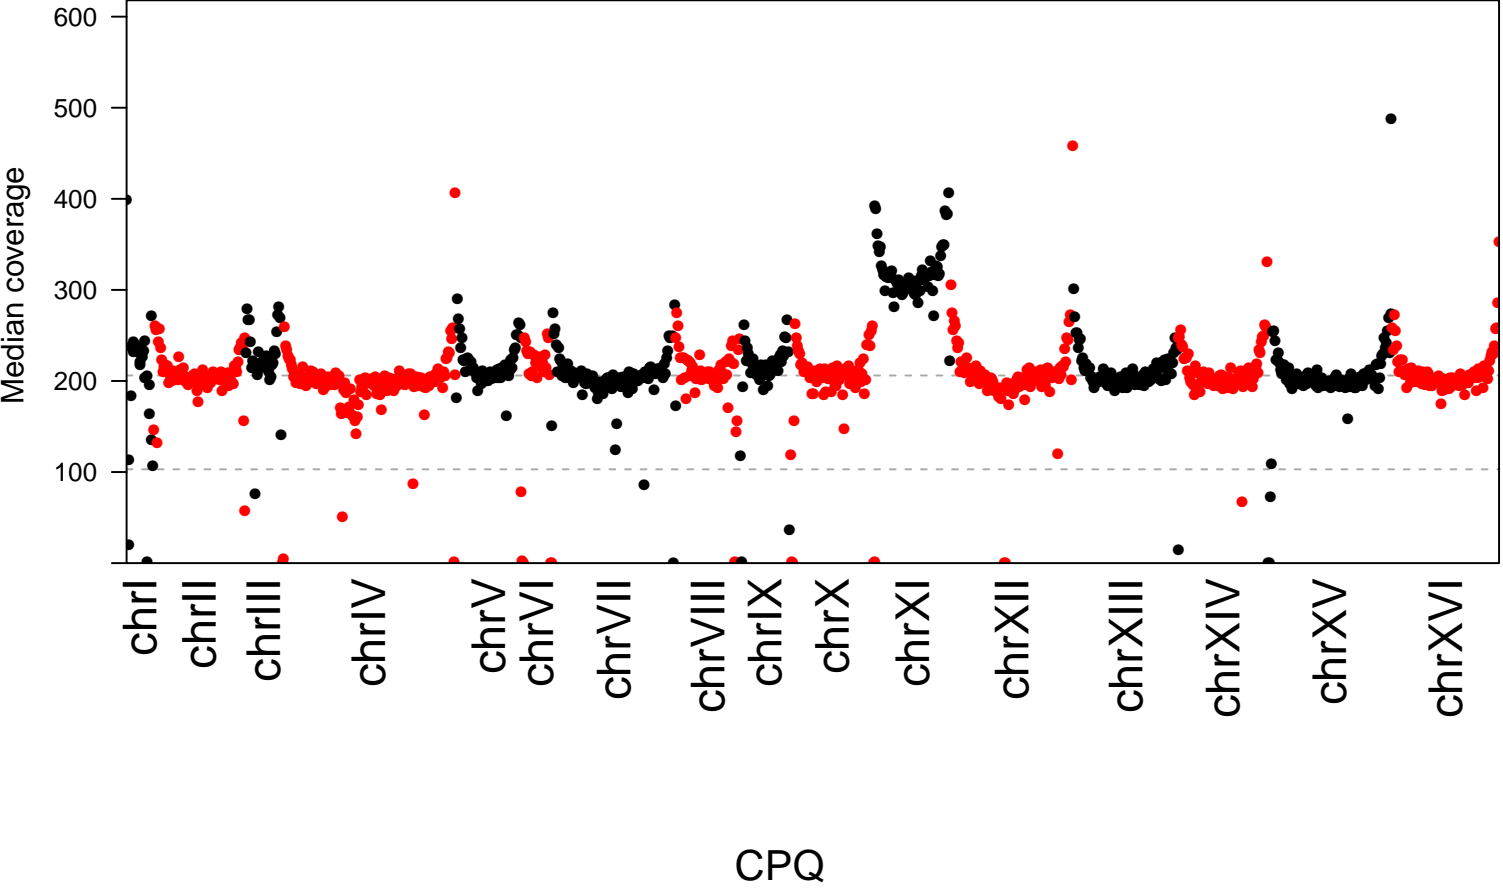

# Supplementary Figure S2

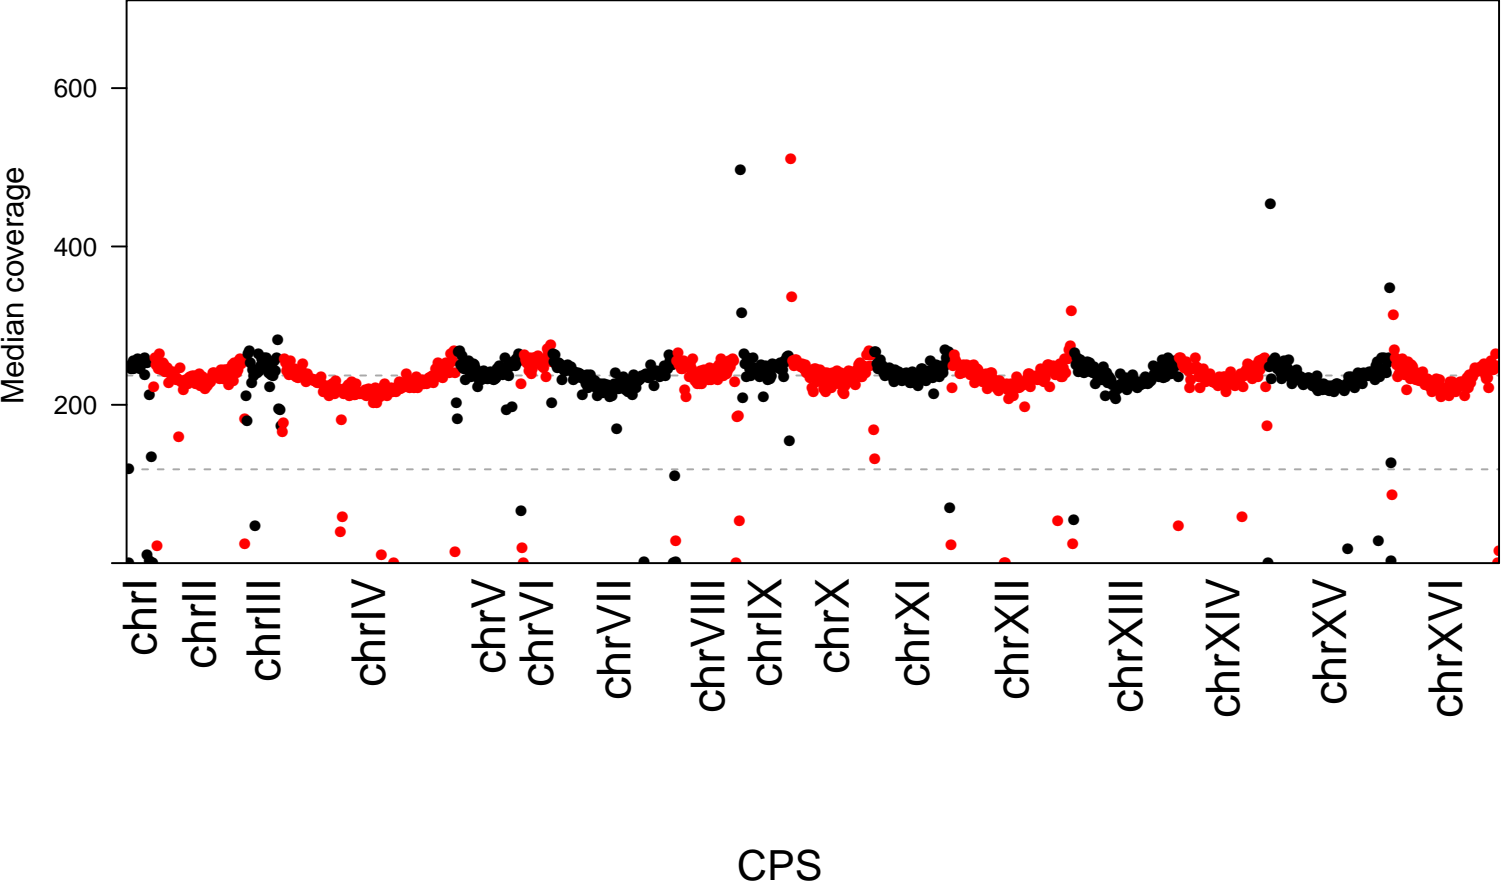

Supplementary Figure S2

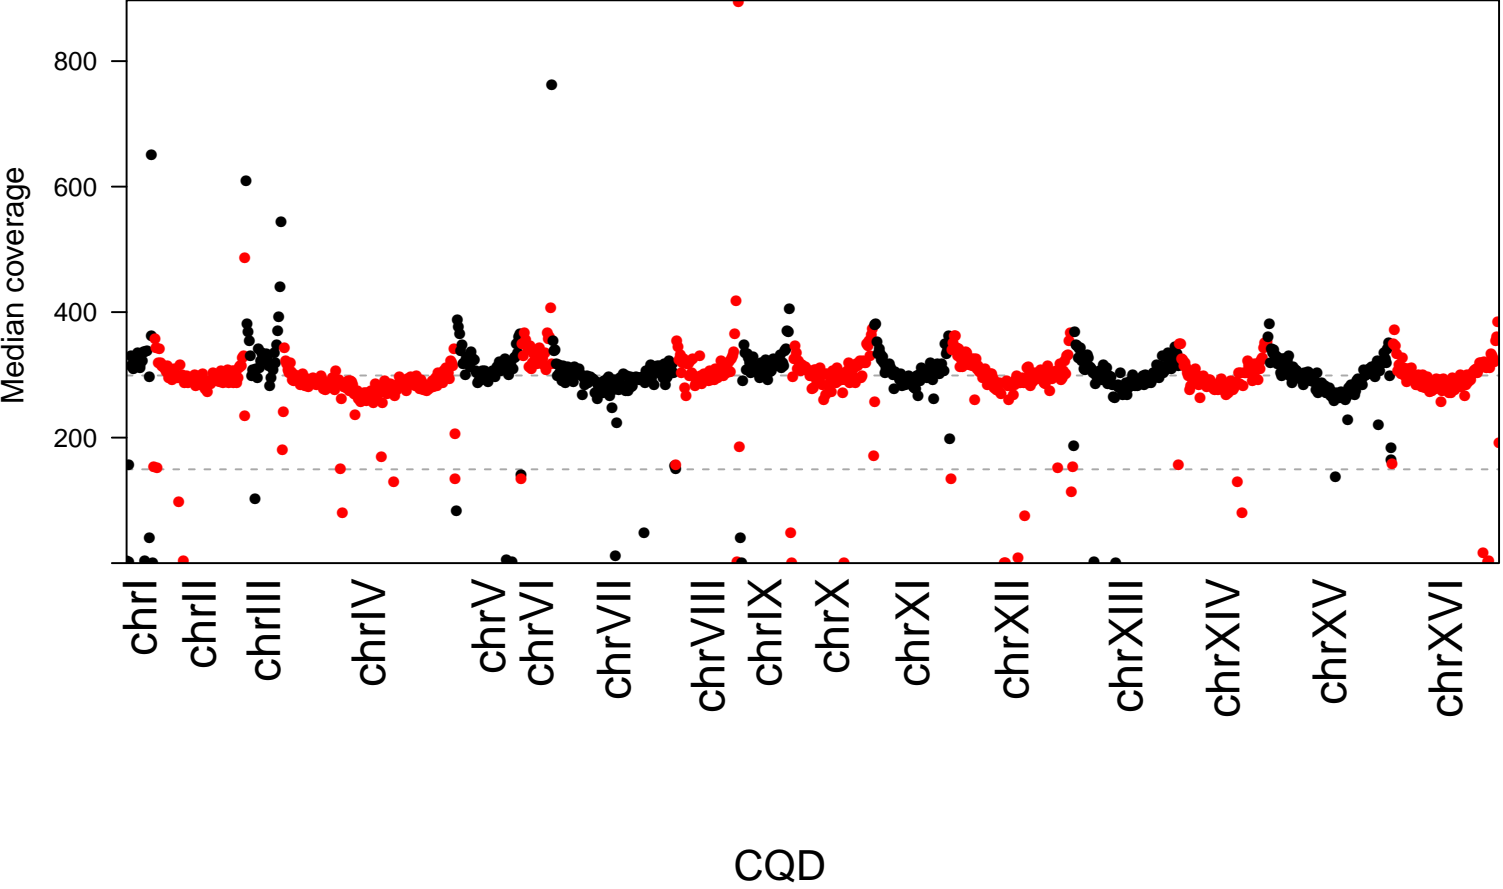

# Supplementary Figure S2

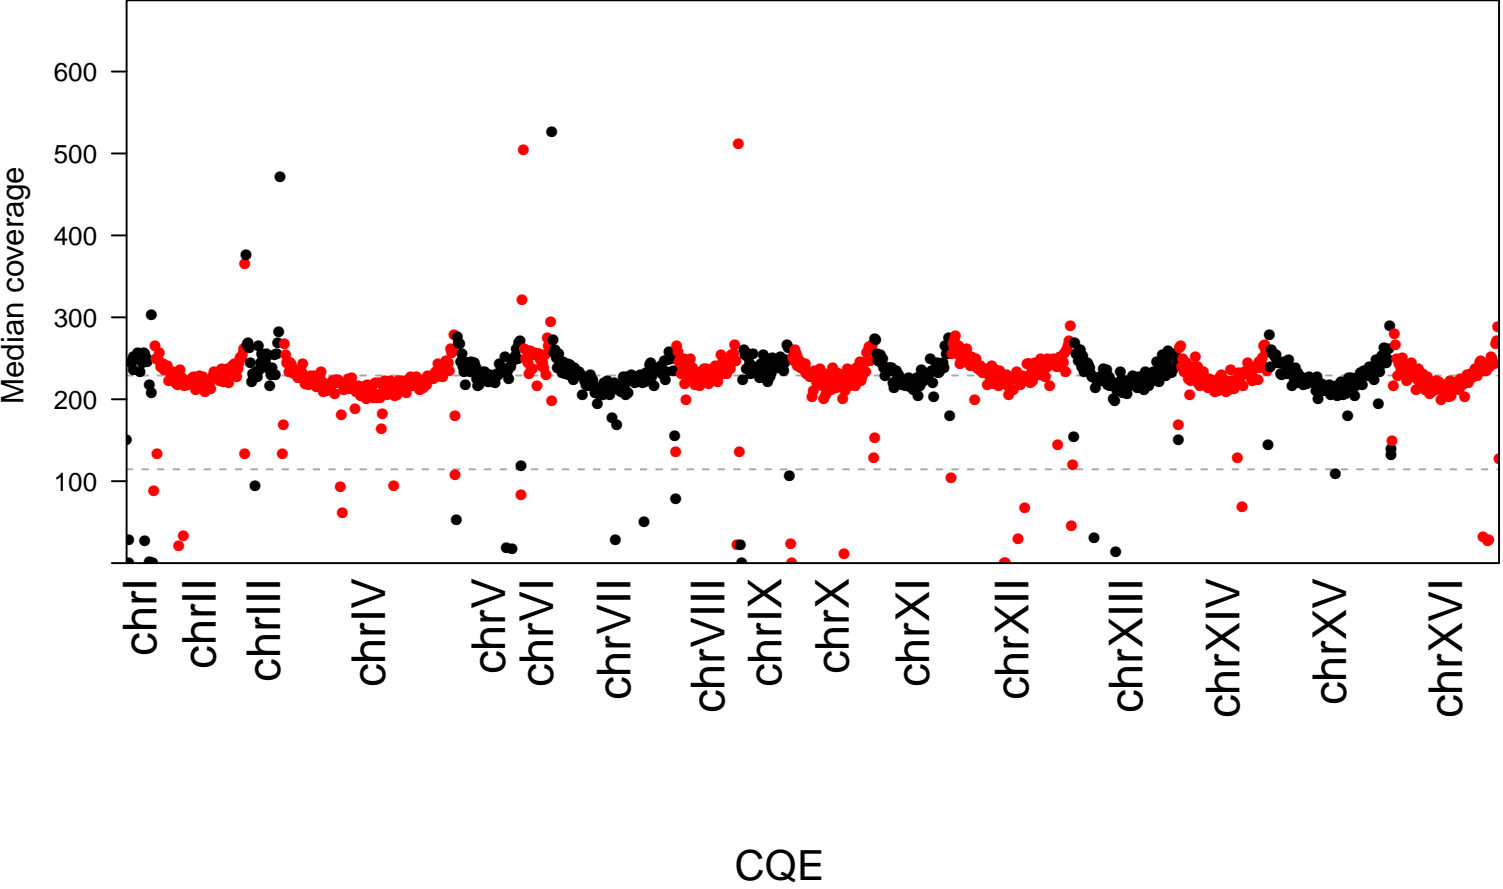

## Supplementary Figure S2

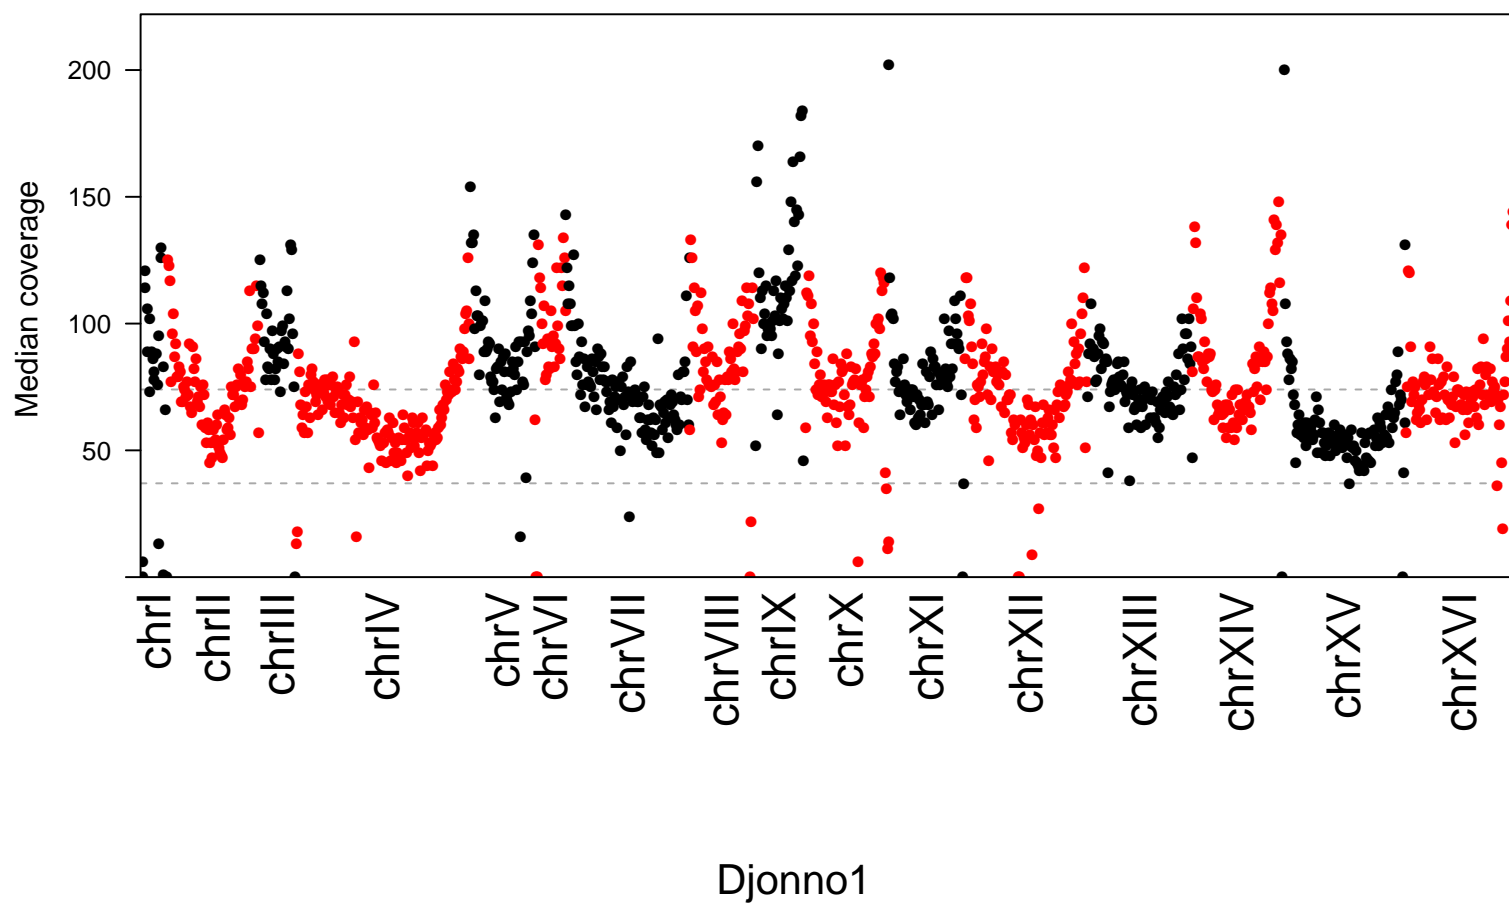



Supplementary Figure S2

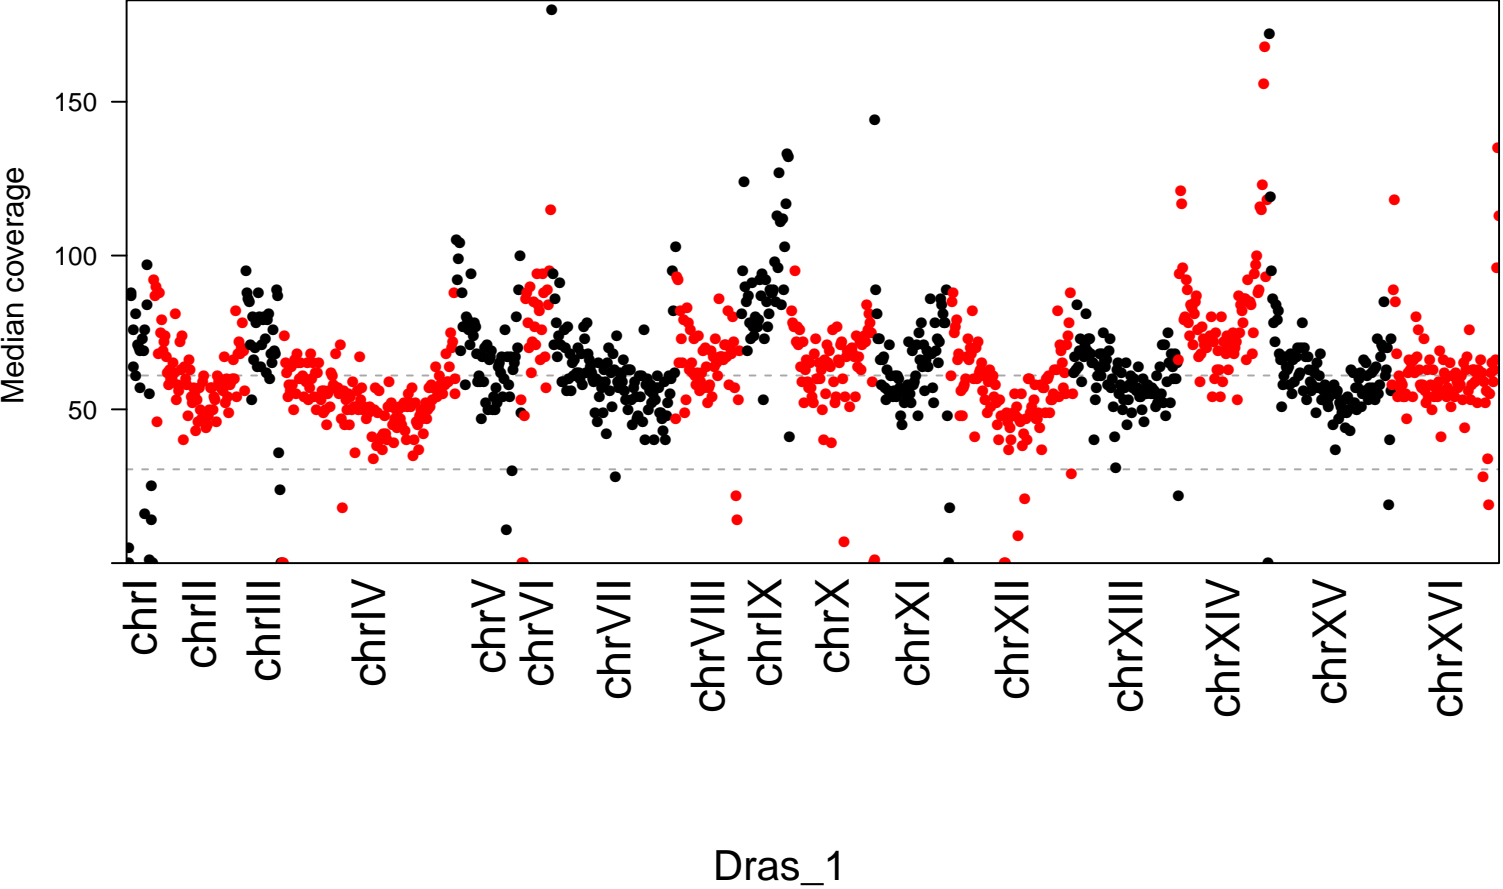

# Supplementary Figure S2

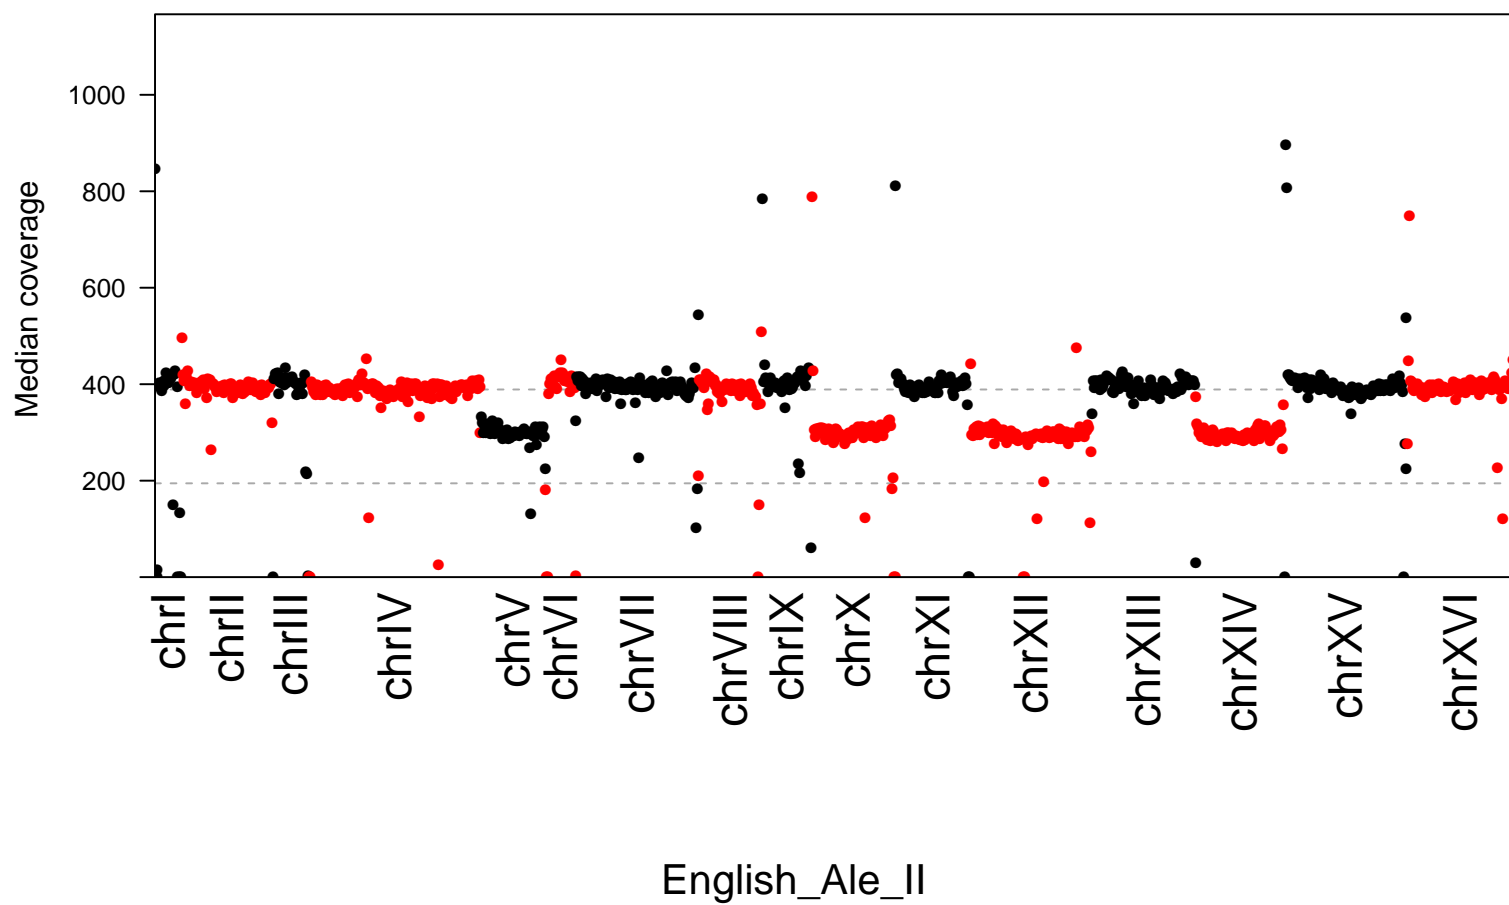

# Supplementary Figure S2

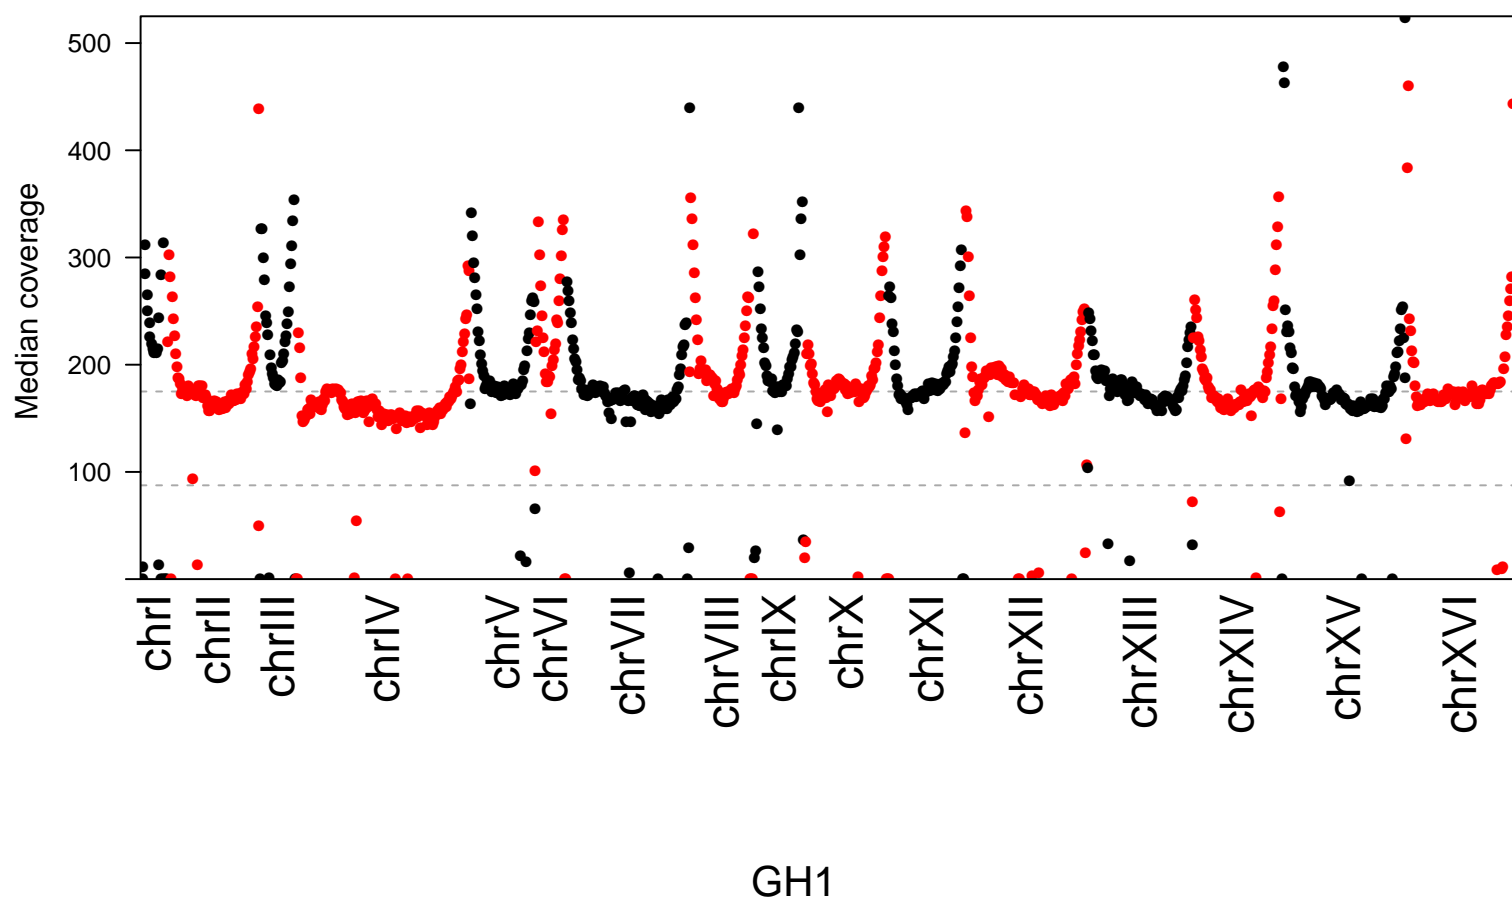

## Supplementary Figure S2

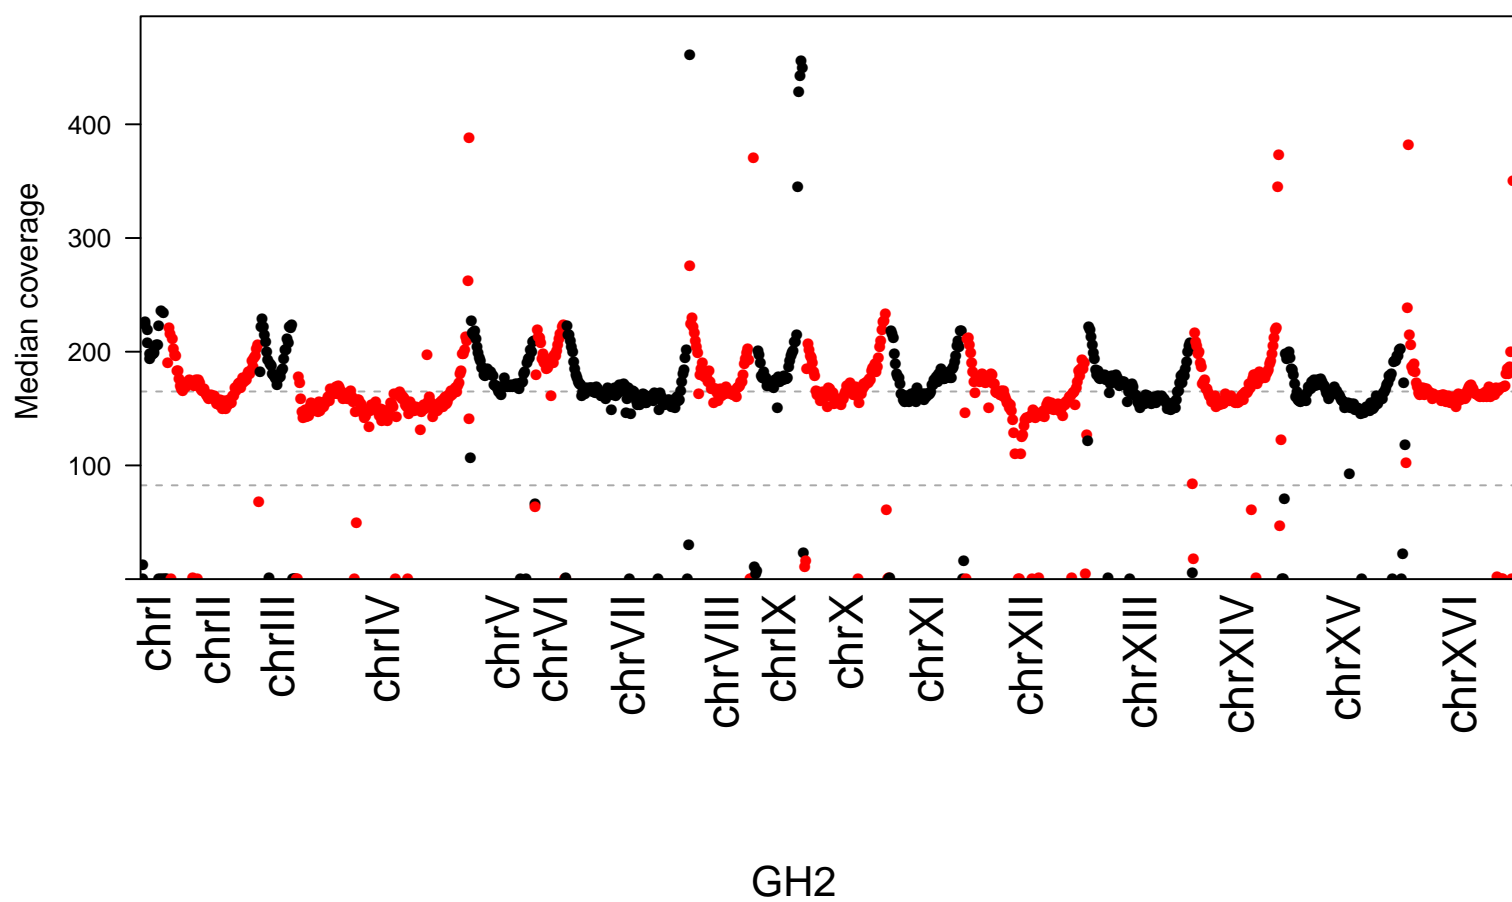

# Supplementary Figure S2

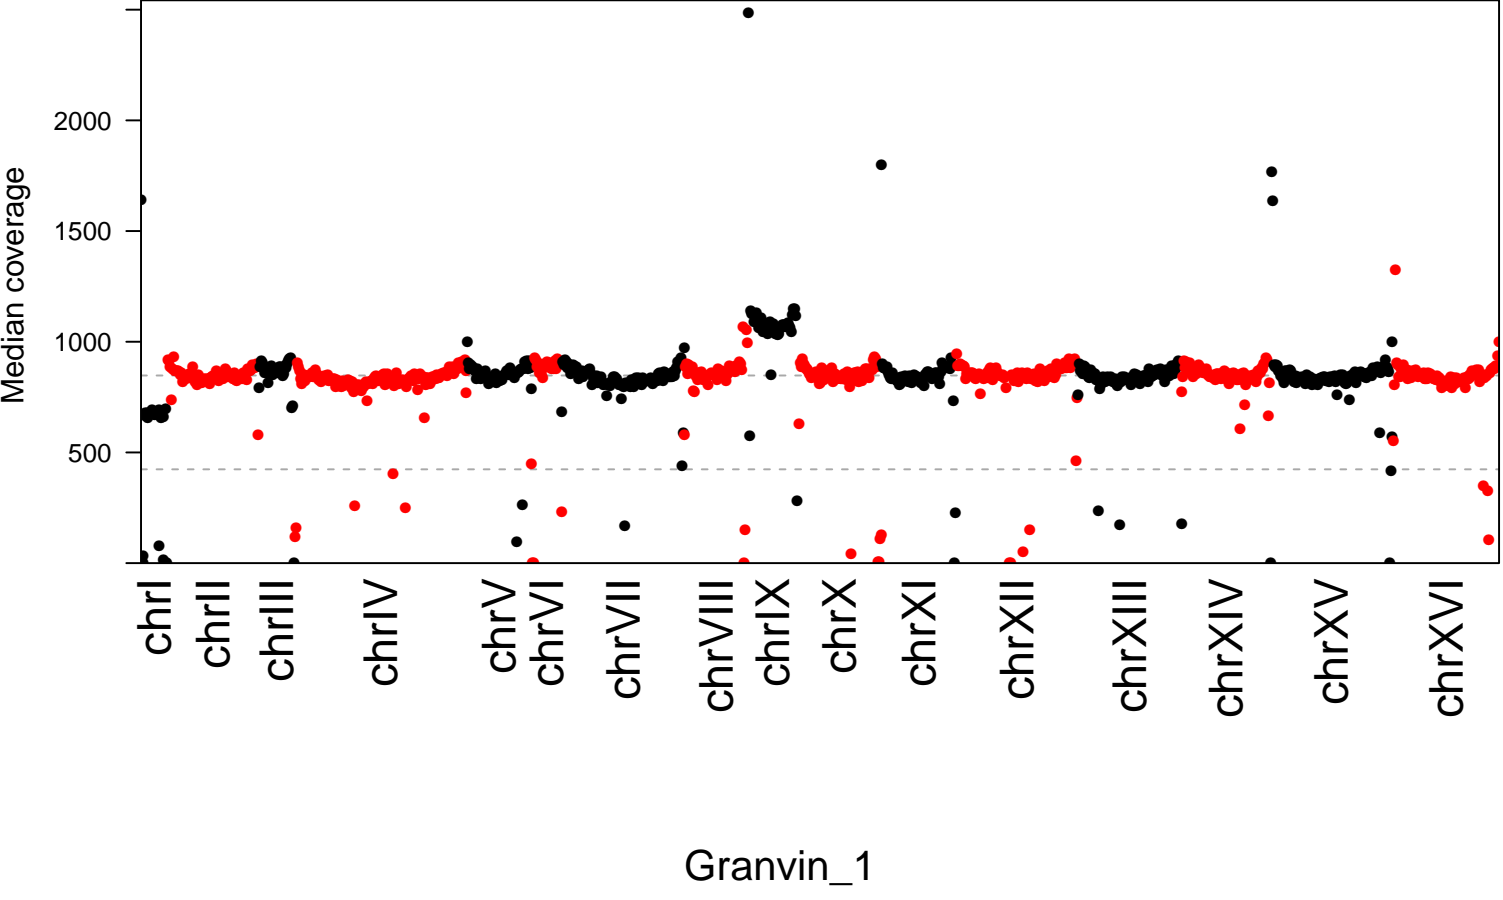

Supplementary Figure S2

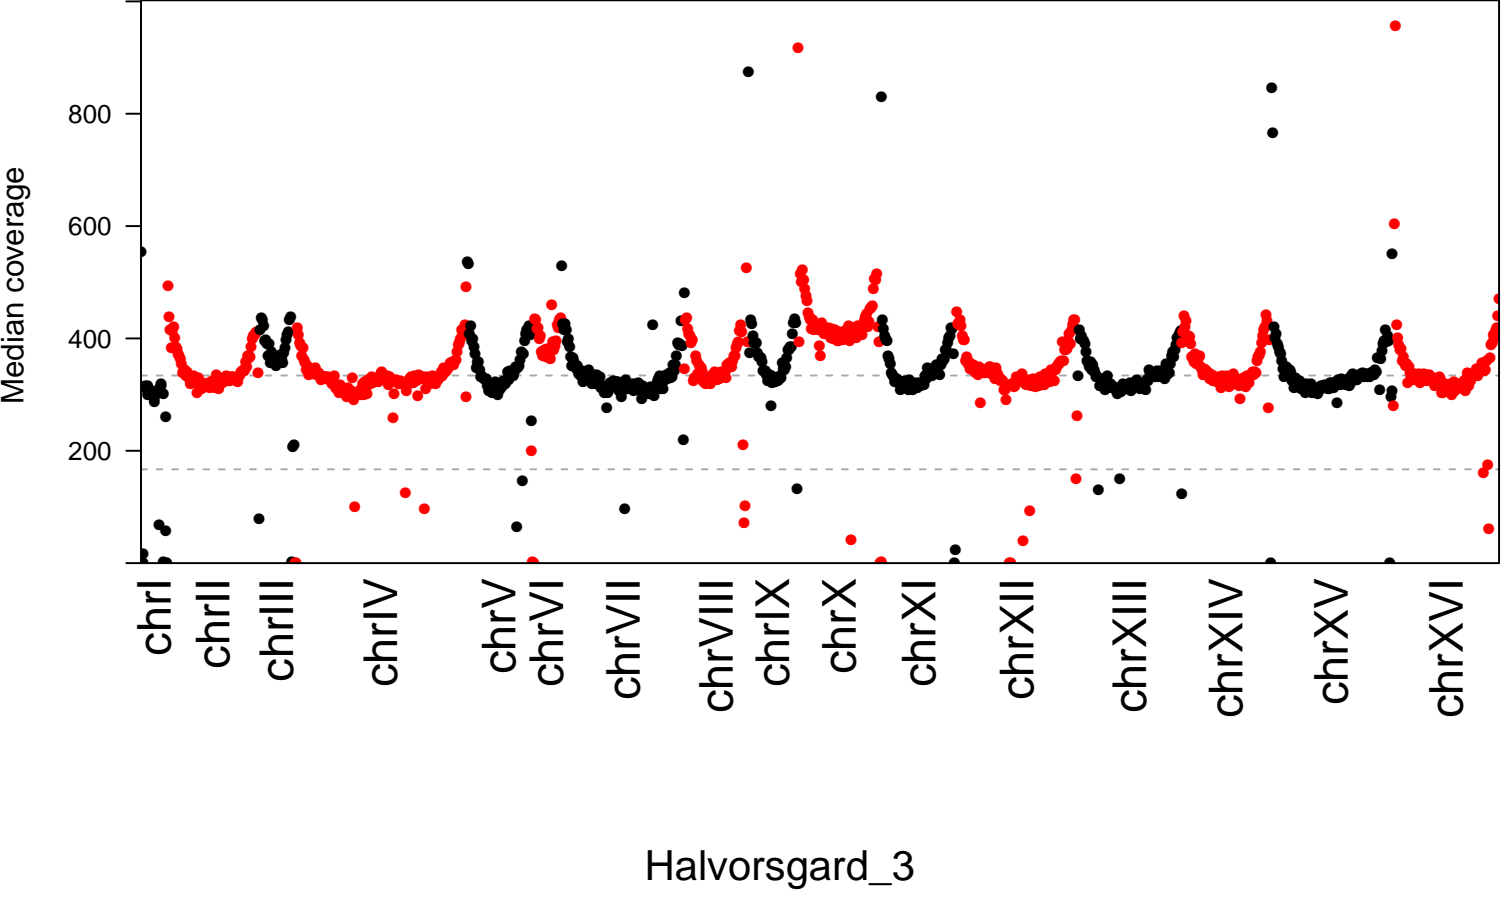

Supplementary Figure S2

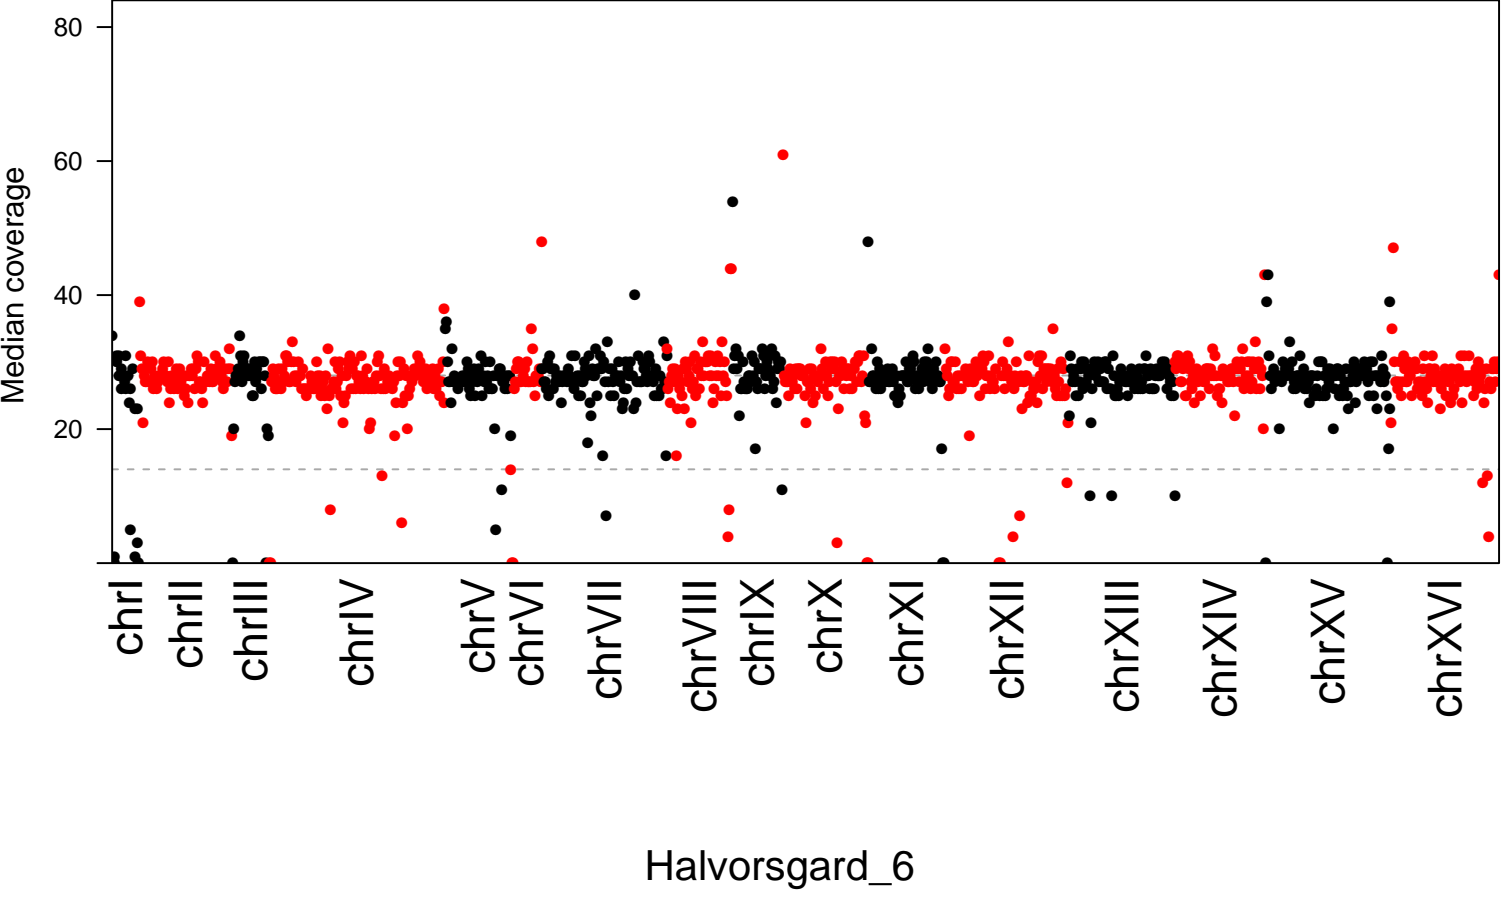

## Supplementary Figure S2

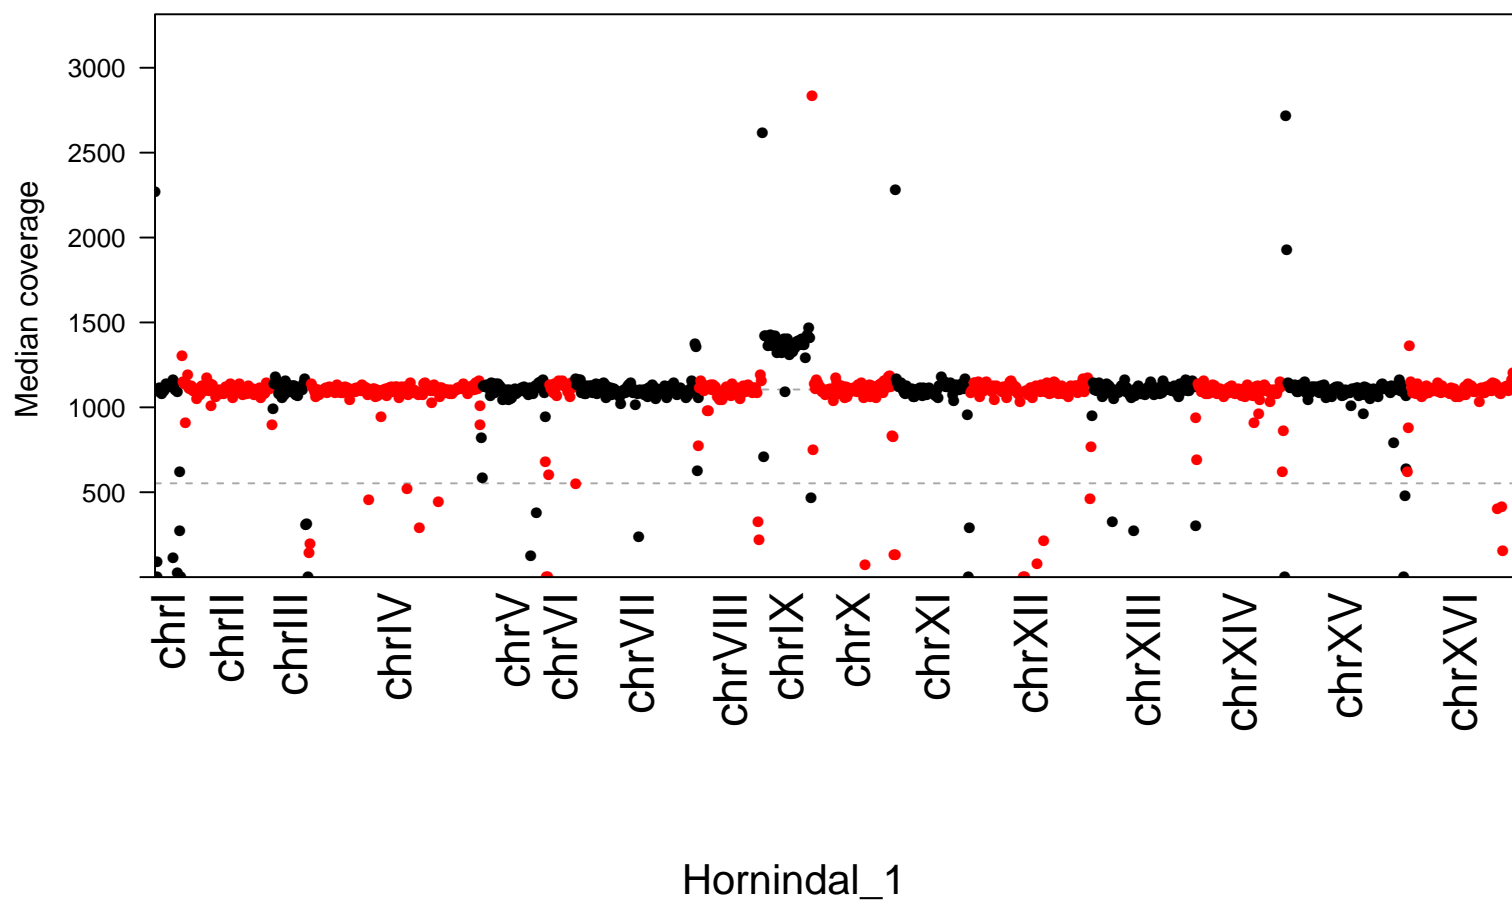



## Supplementary Figure S2

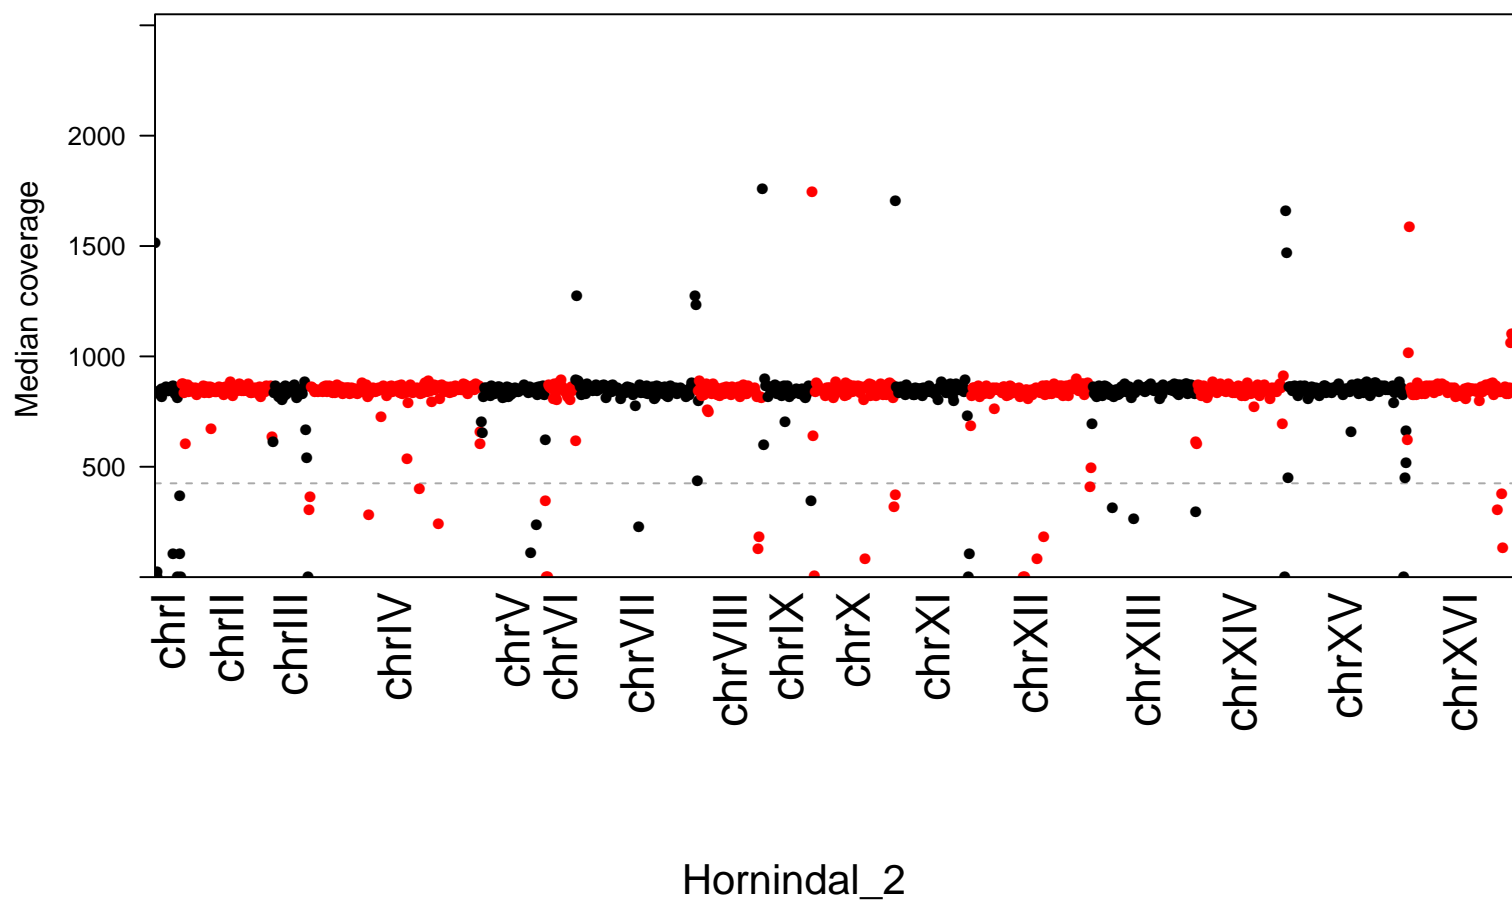

Supplementary Figure S2

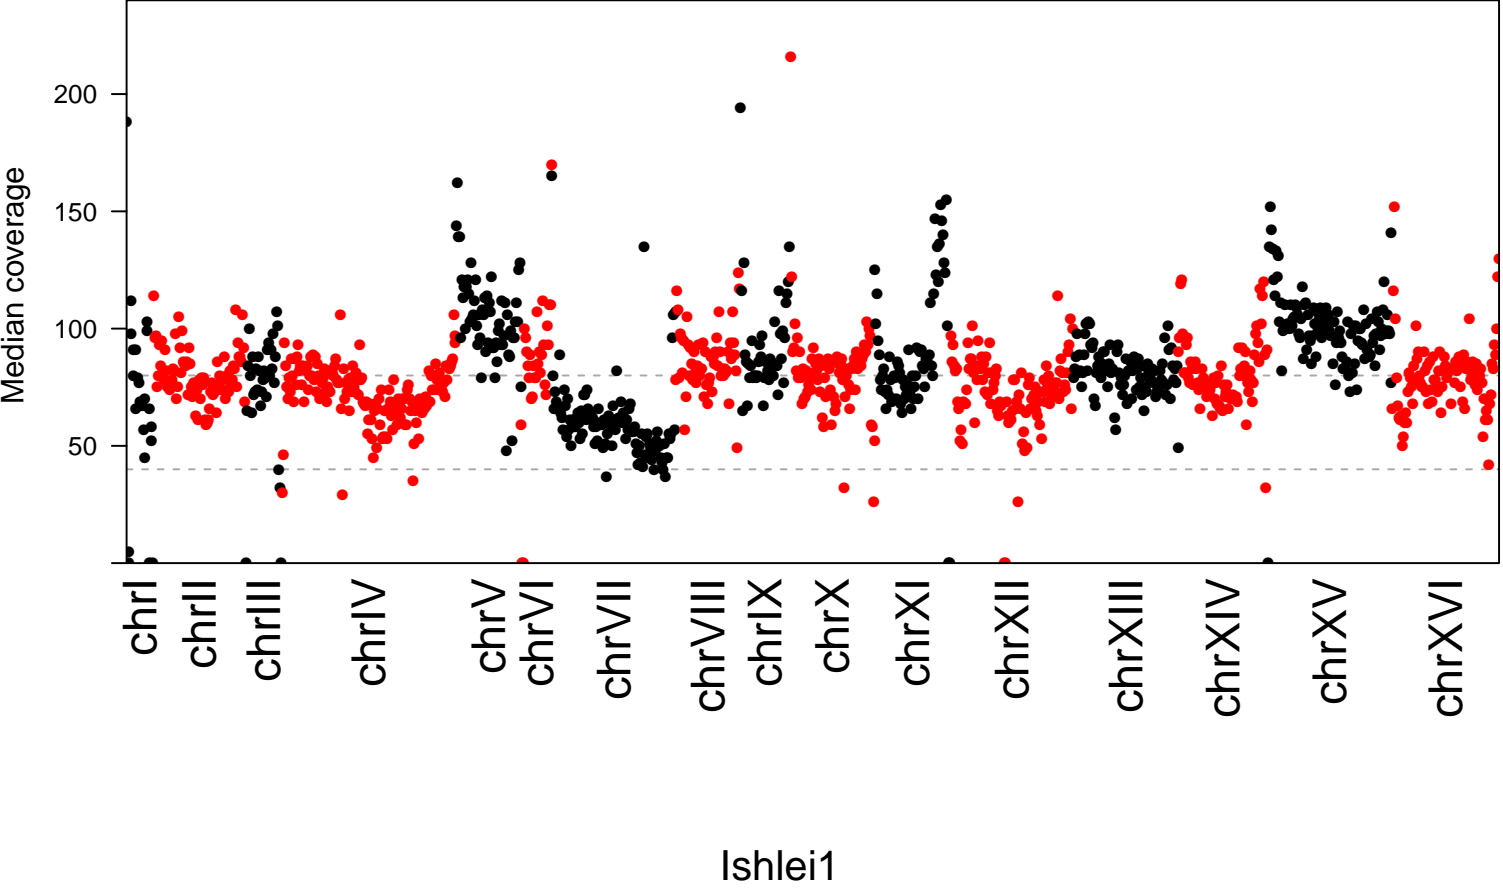

## Supplementary Figure S2

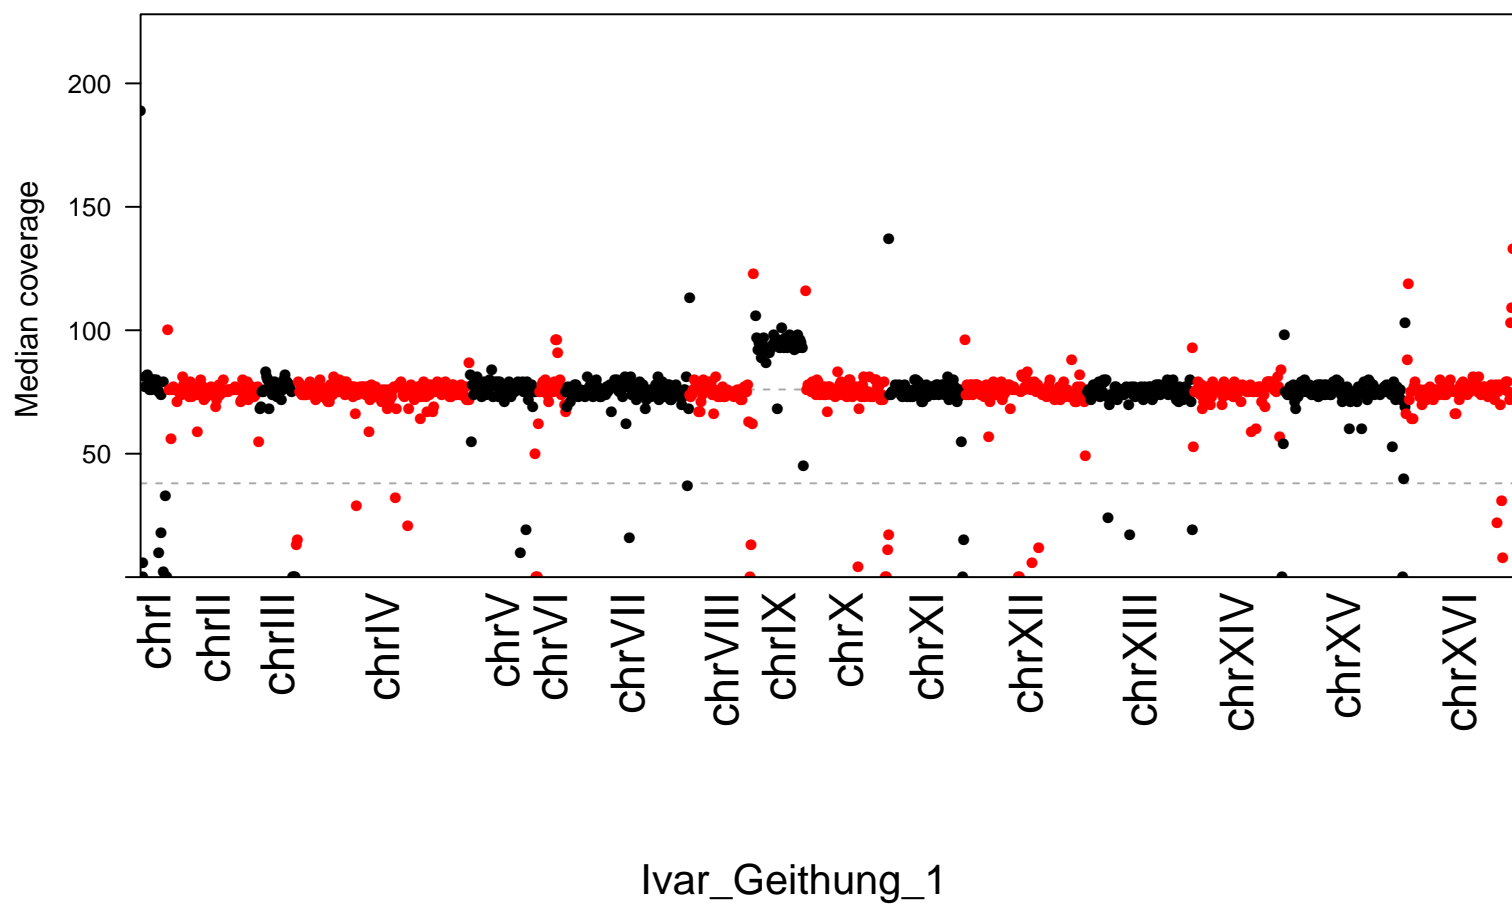

## Supplementary Figure S2

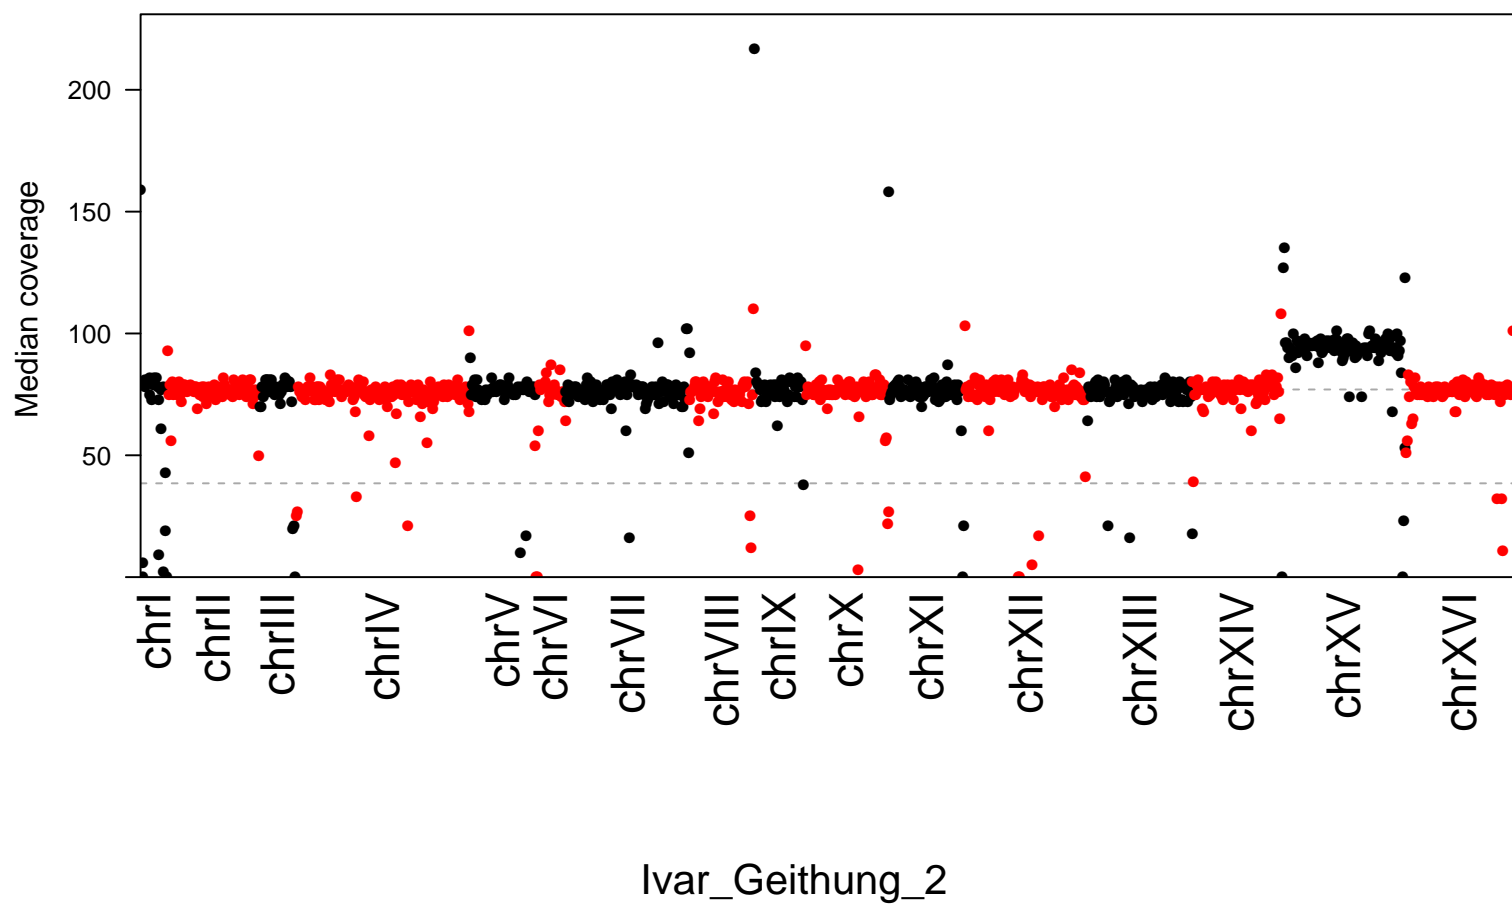

# Supplementary Figure S2

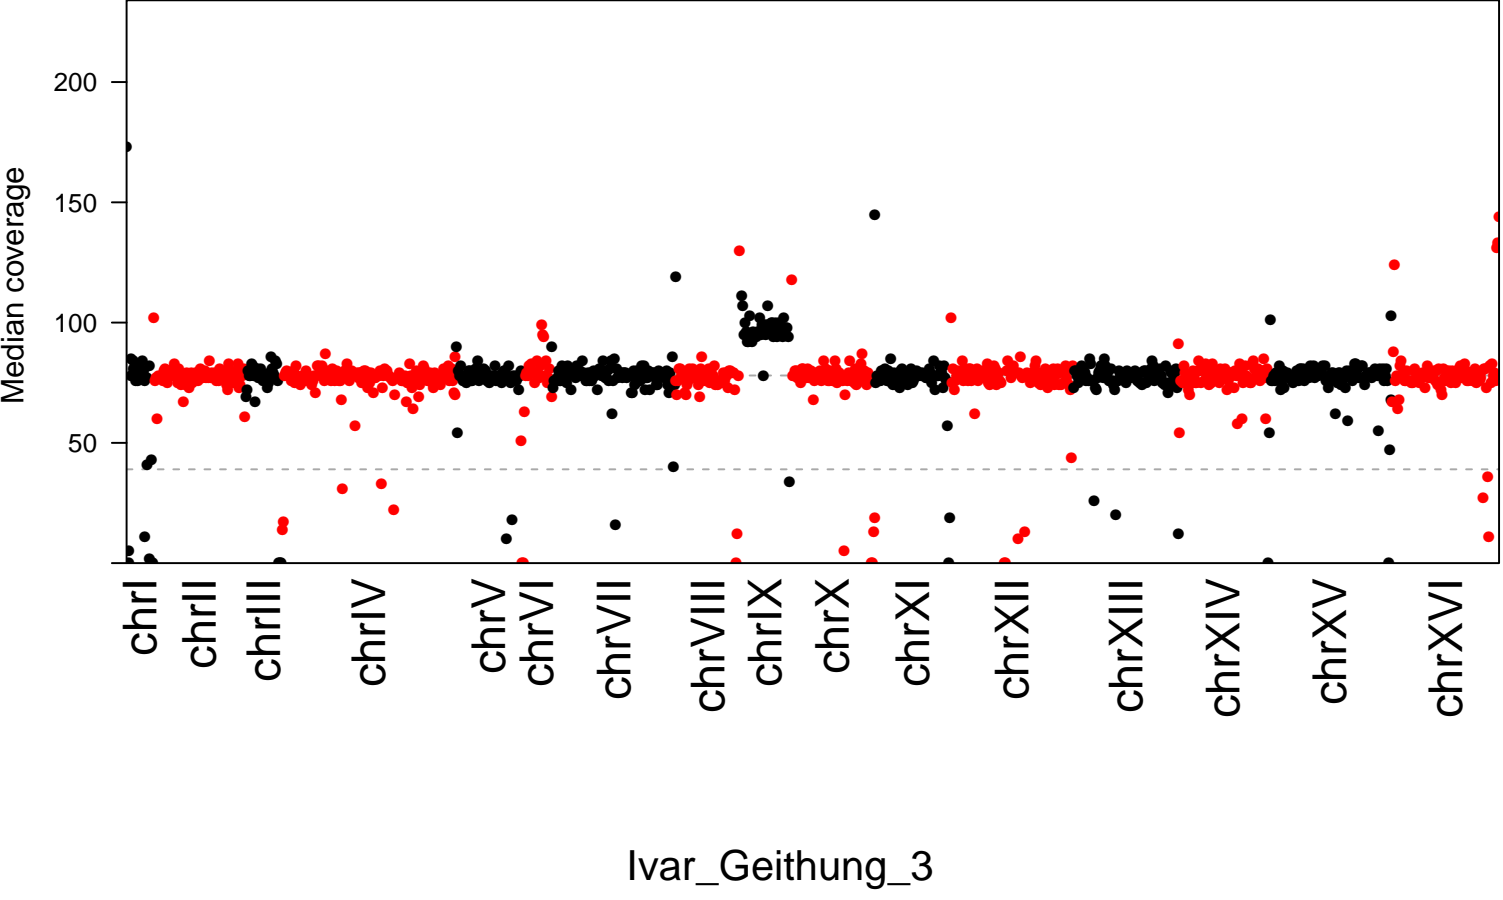

# Supplementary Figure S2

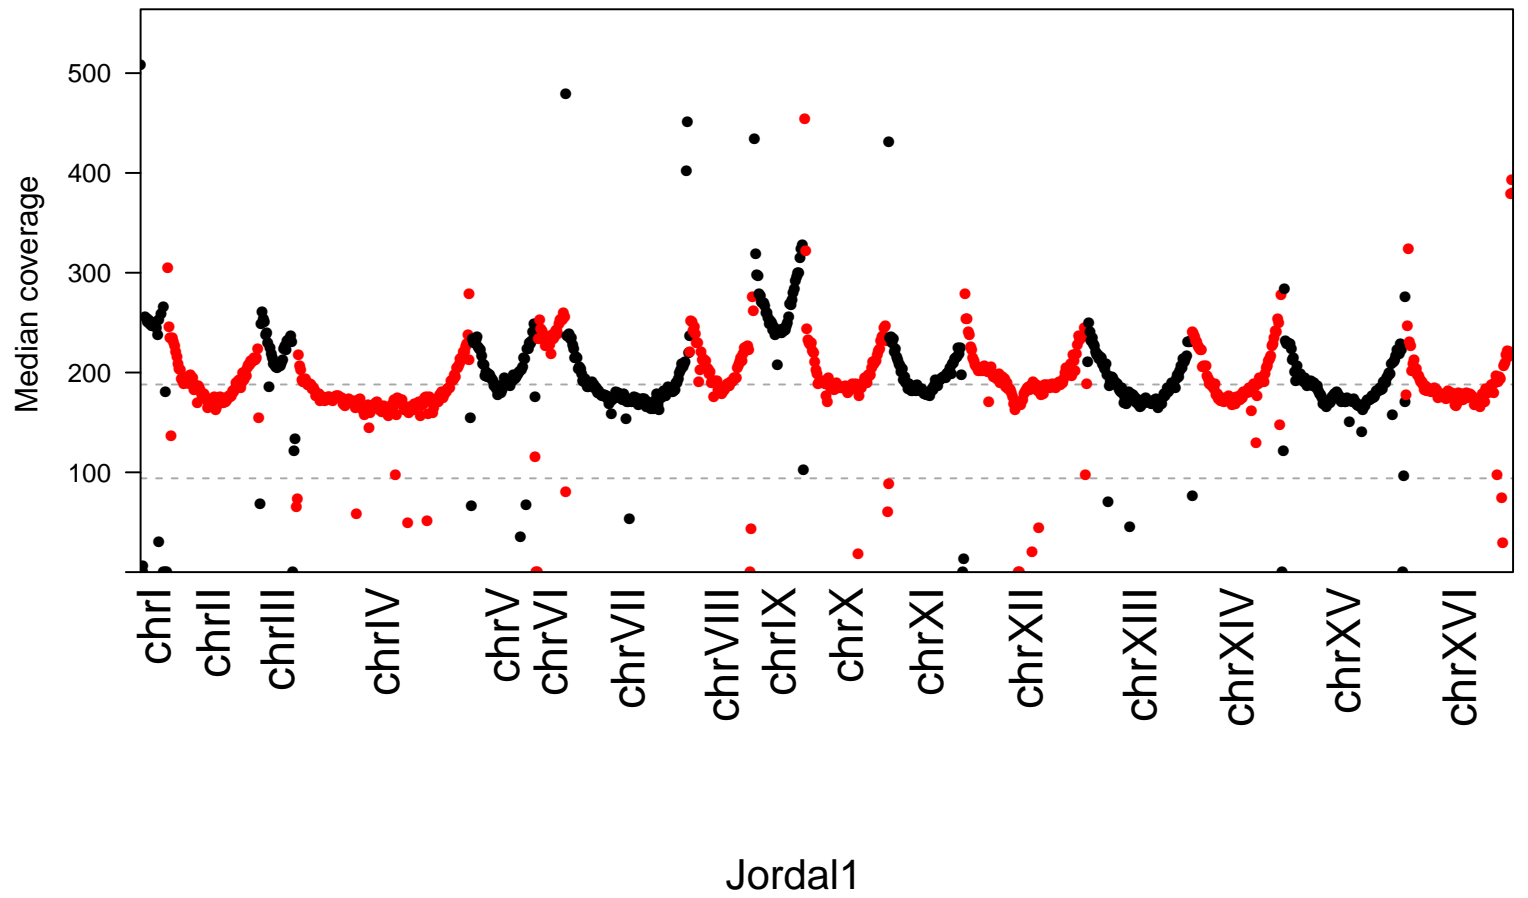

## Supplementary Figure S2

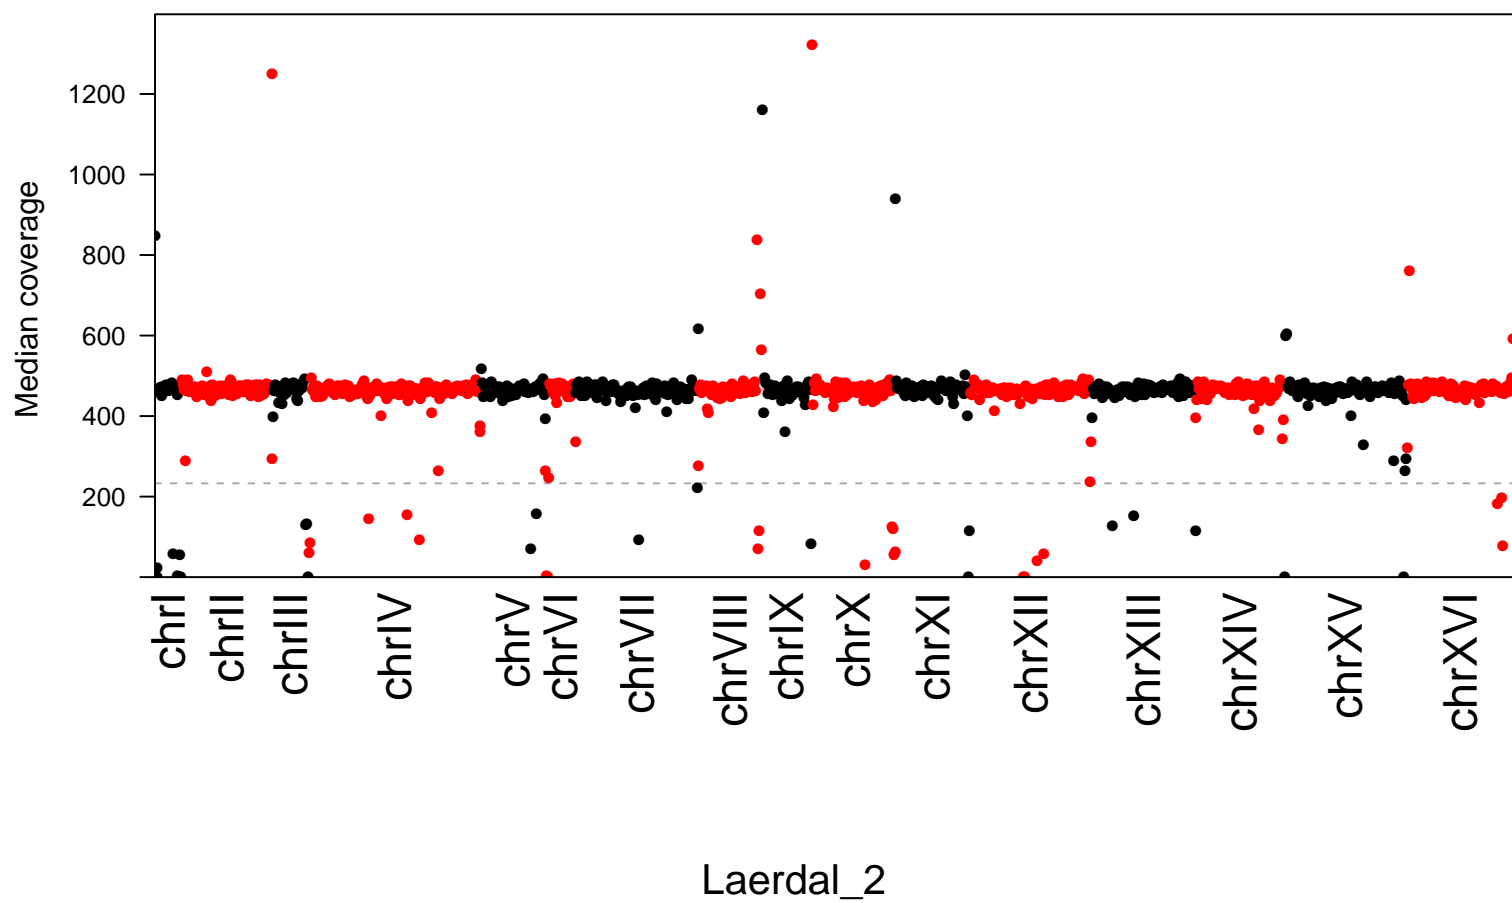

# Supplementary Figure S2

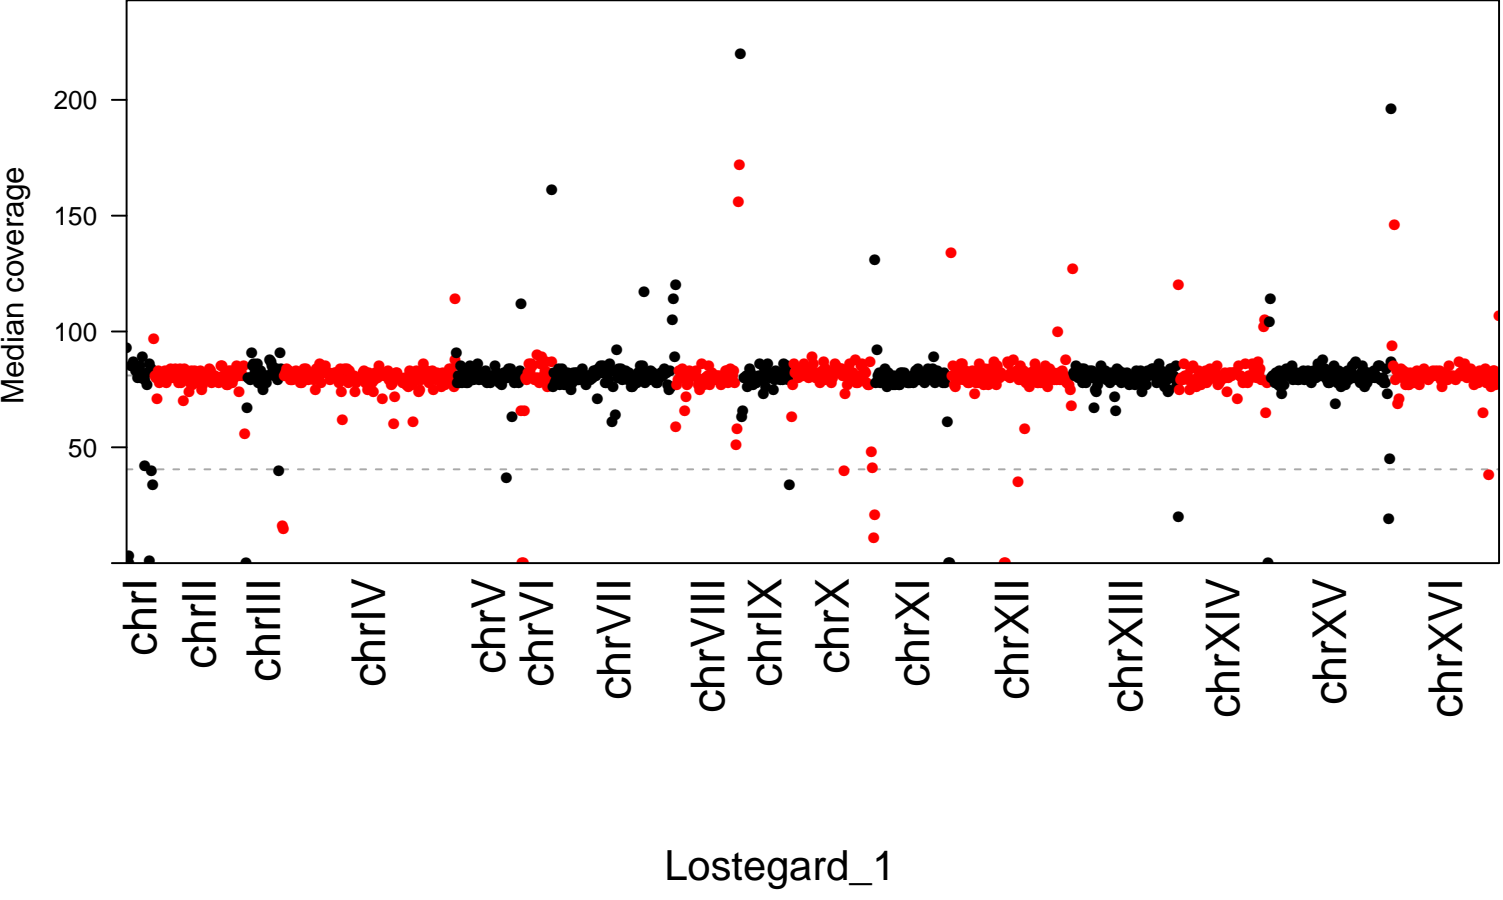



## Supplementary Figure S2

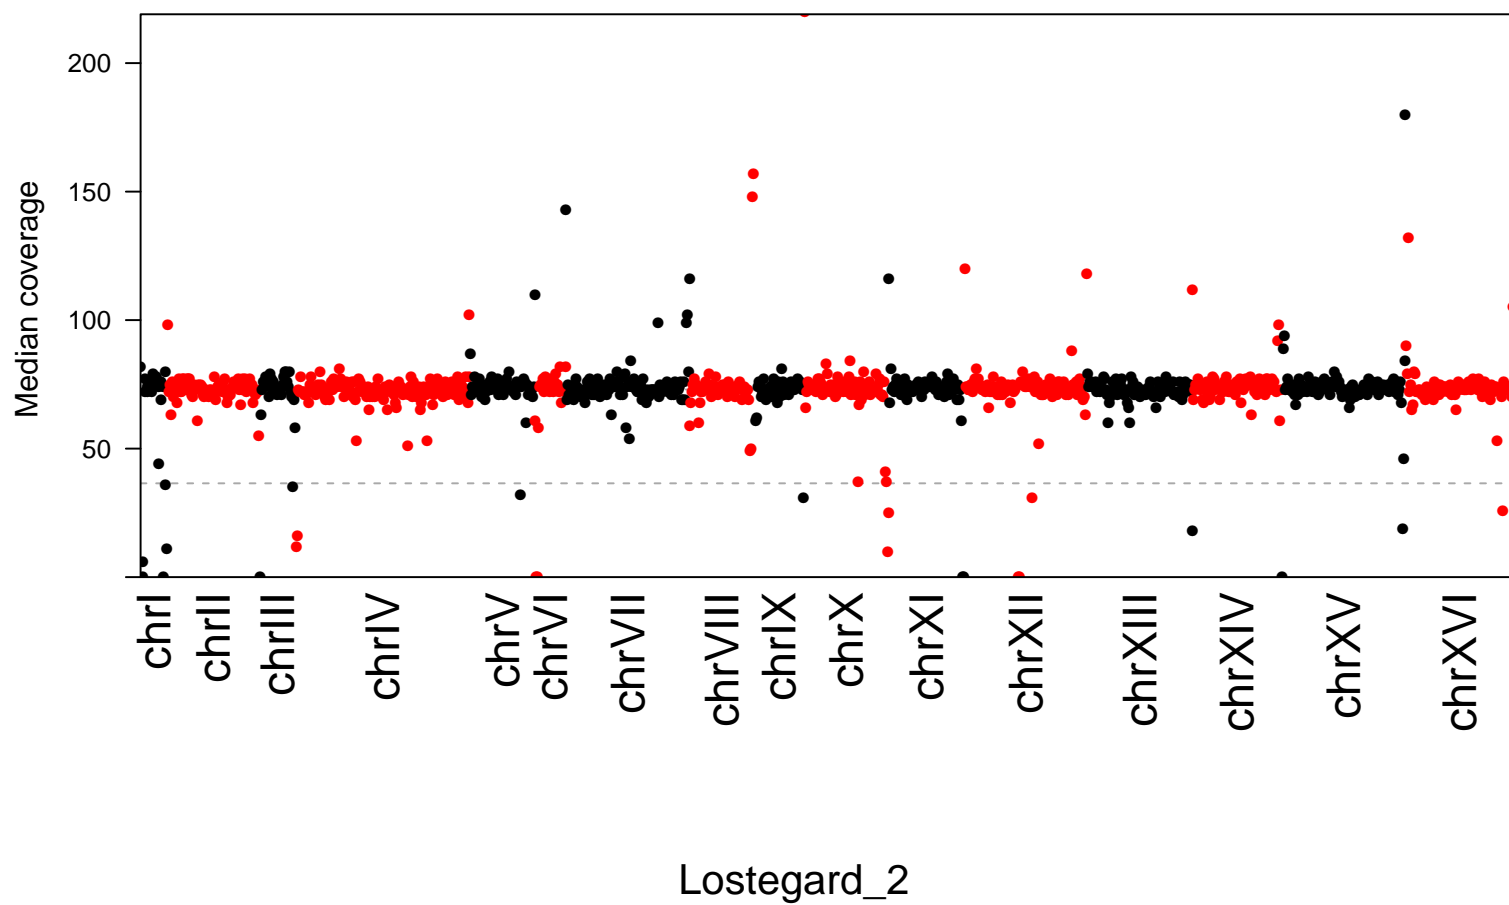

## Supplementary Figure S2

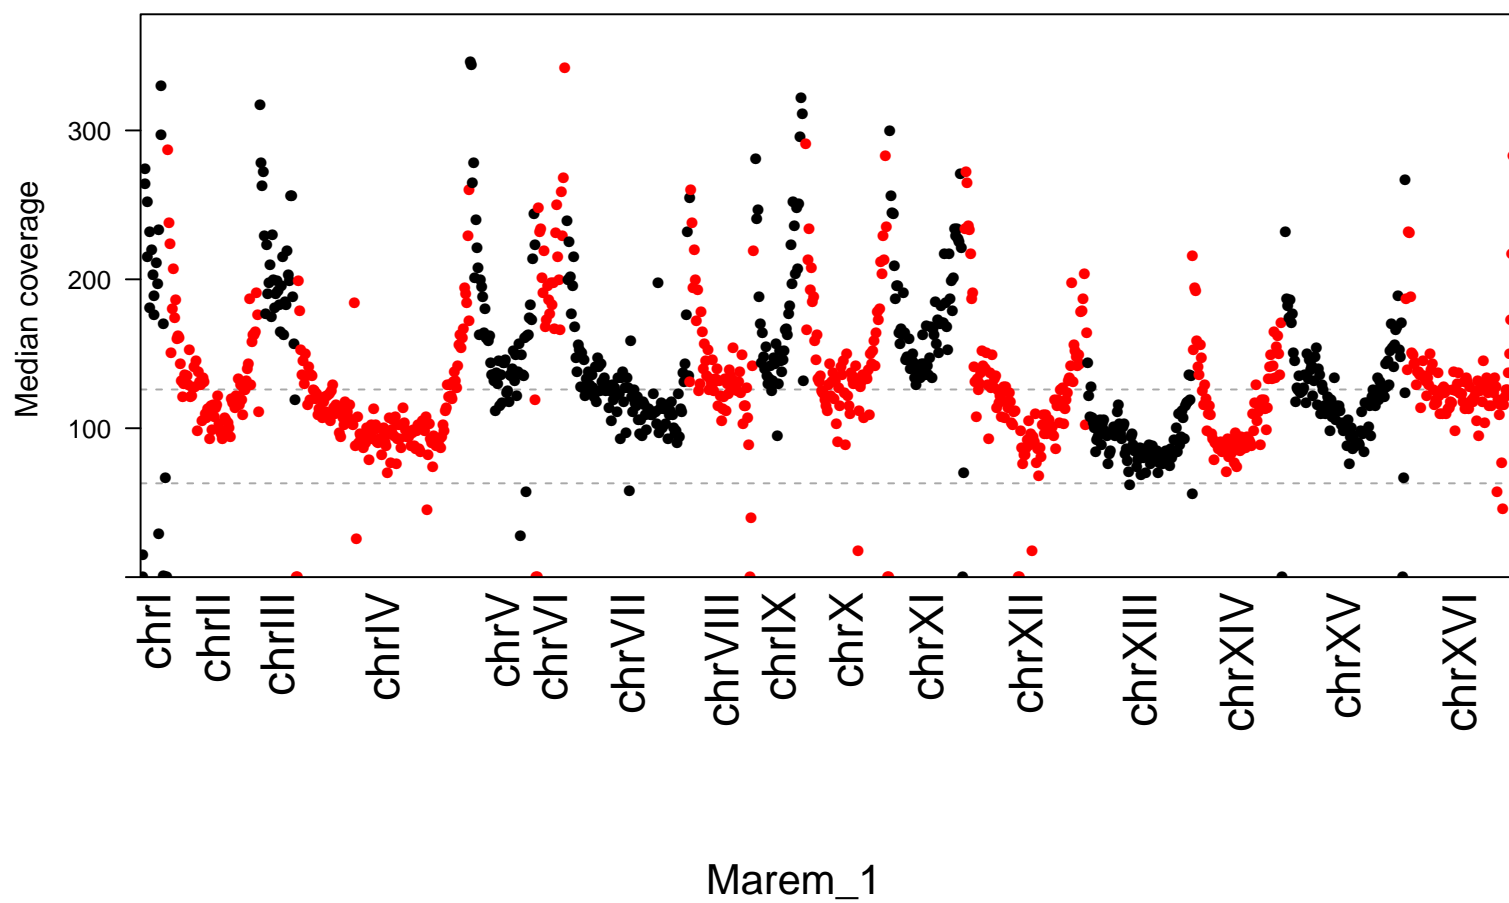

# Supplementary Figure S2

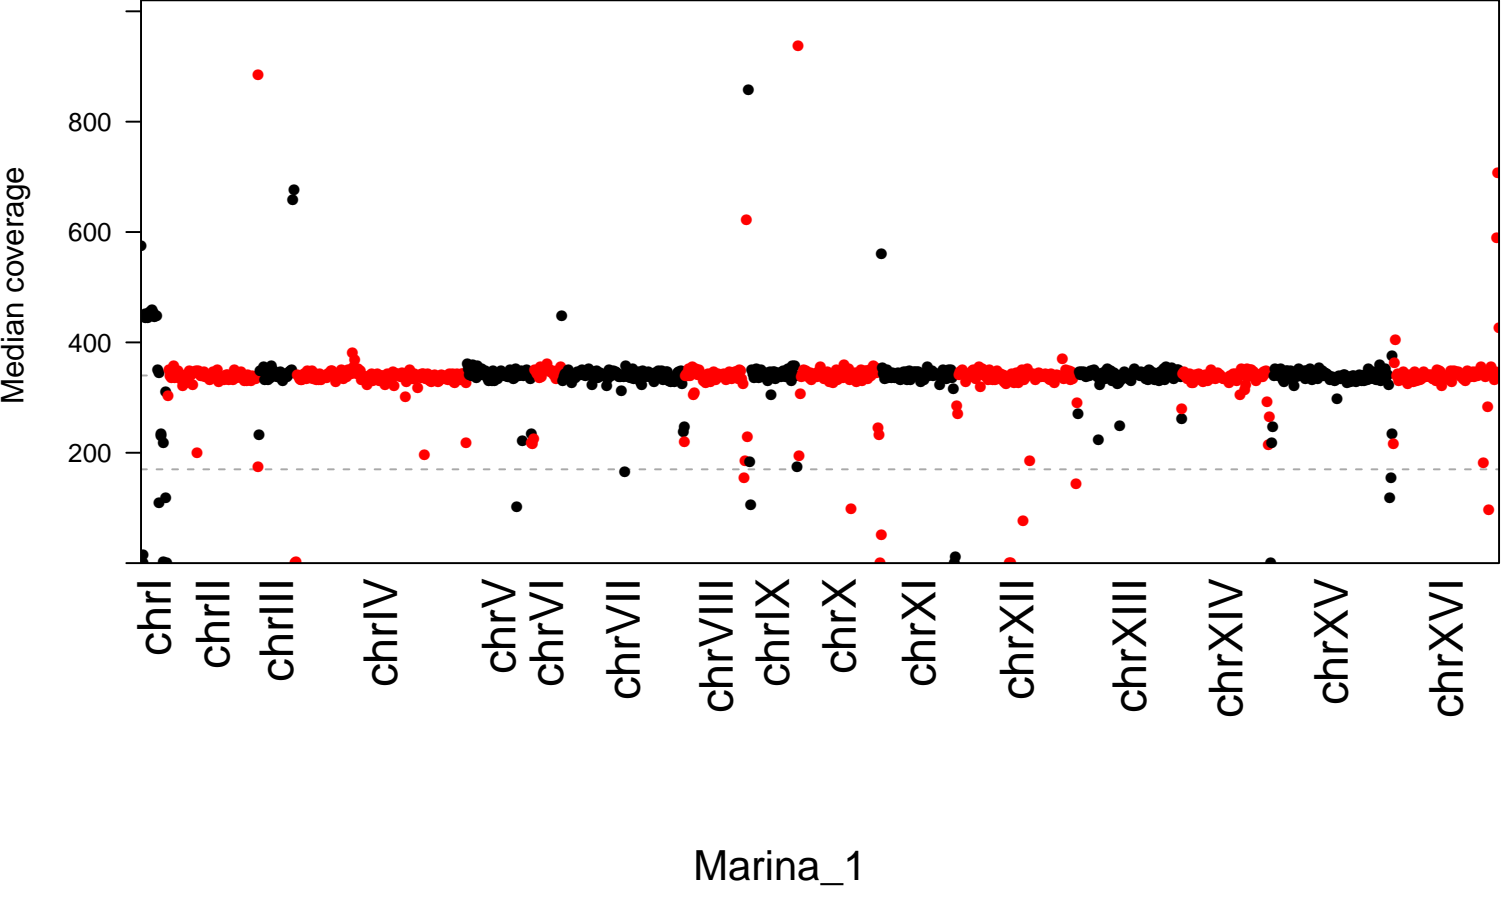

# Supplementary Figure S2

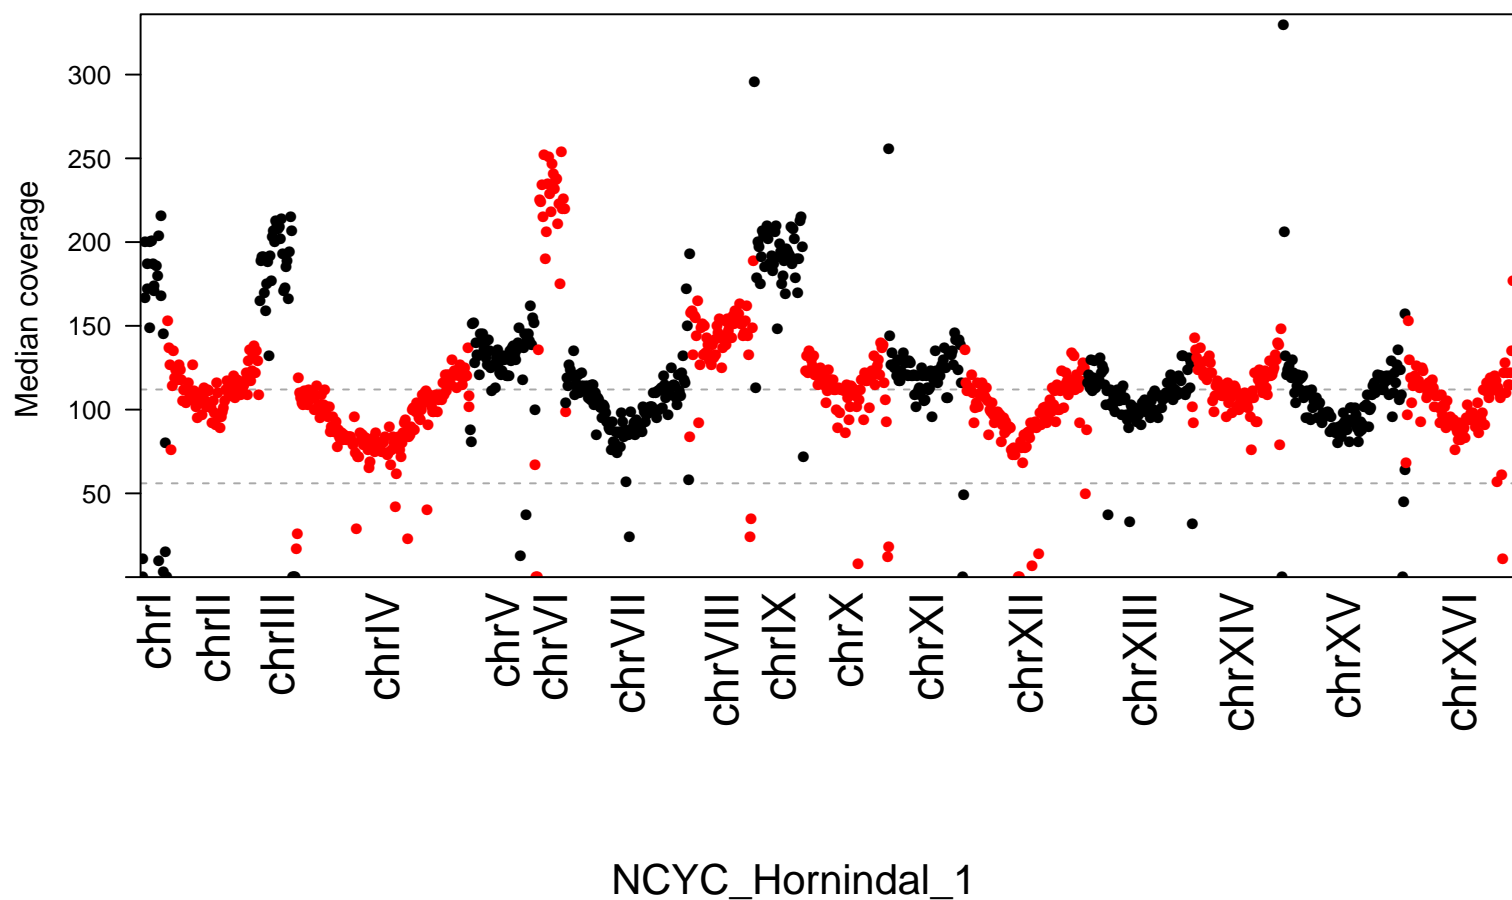

# Supplementary Figure S2

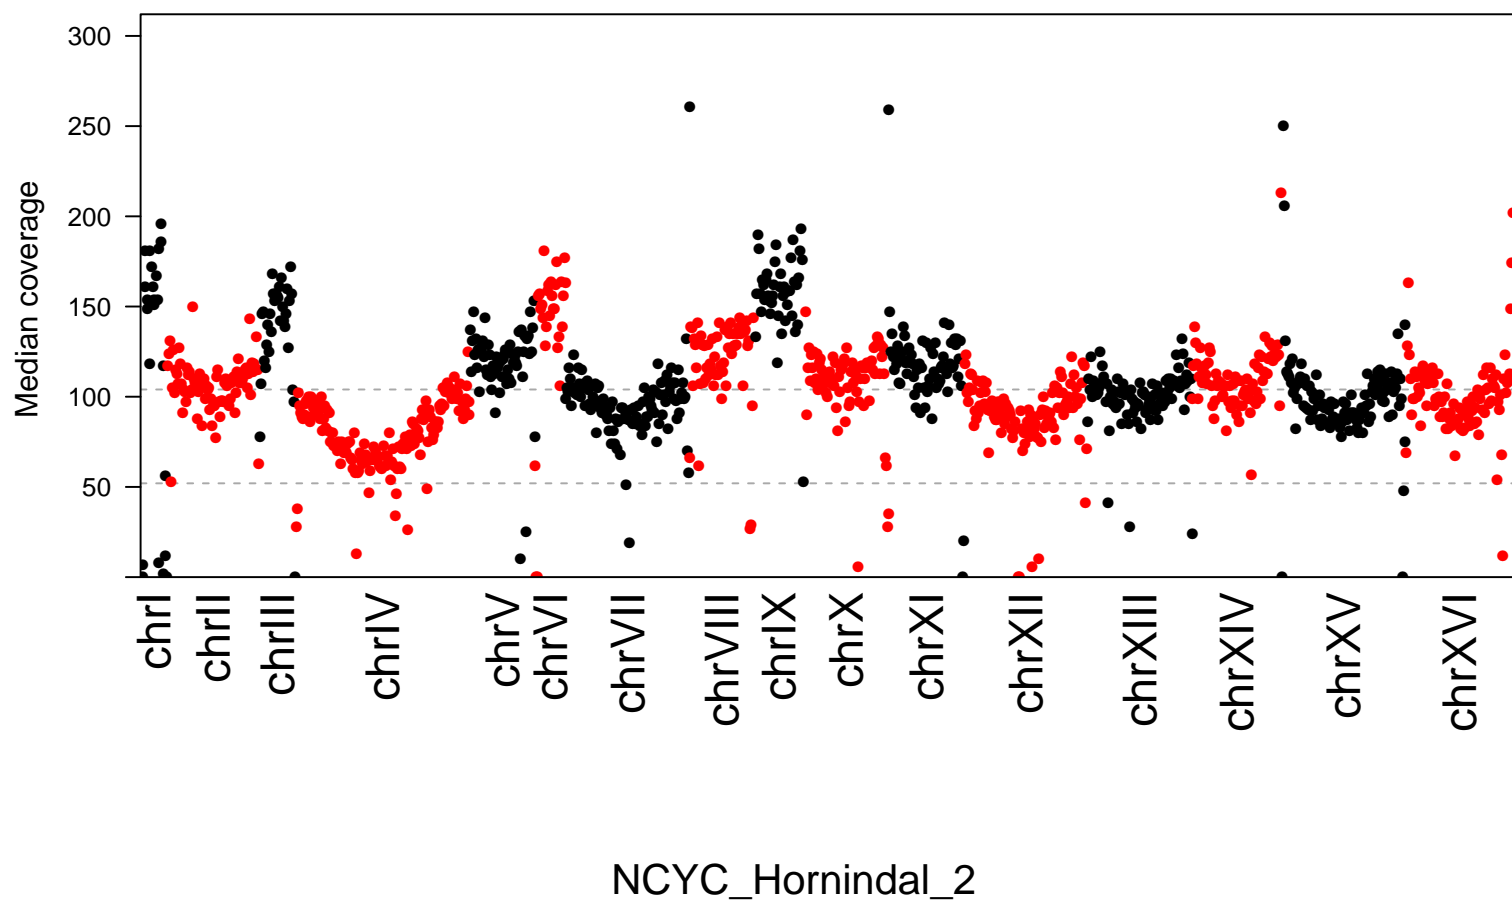

# Supplementary Figure S2

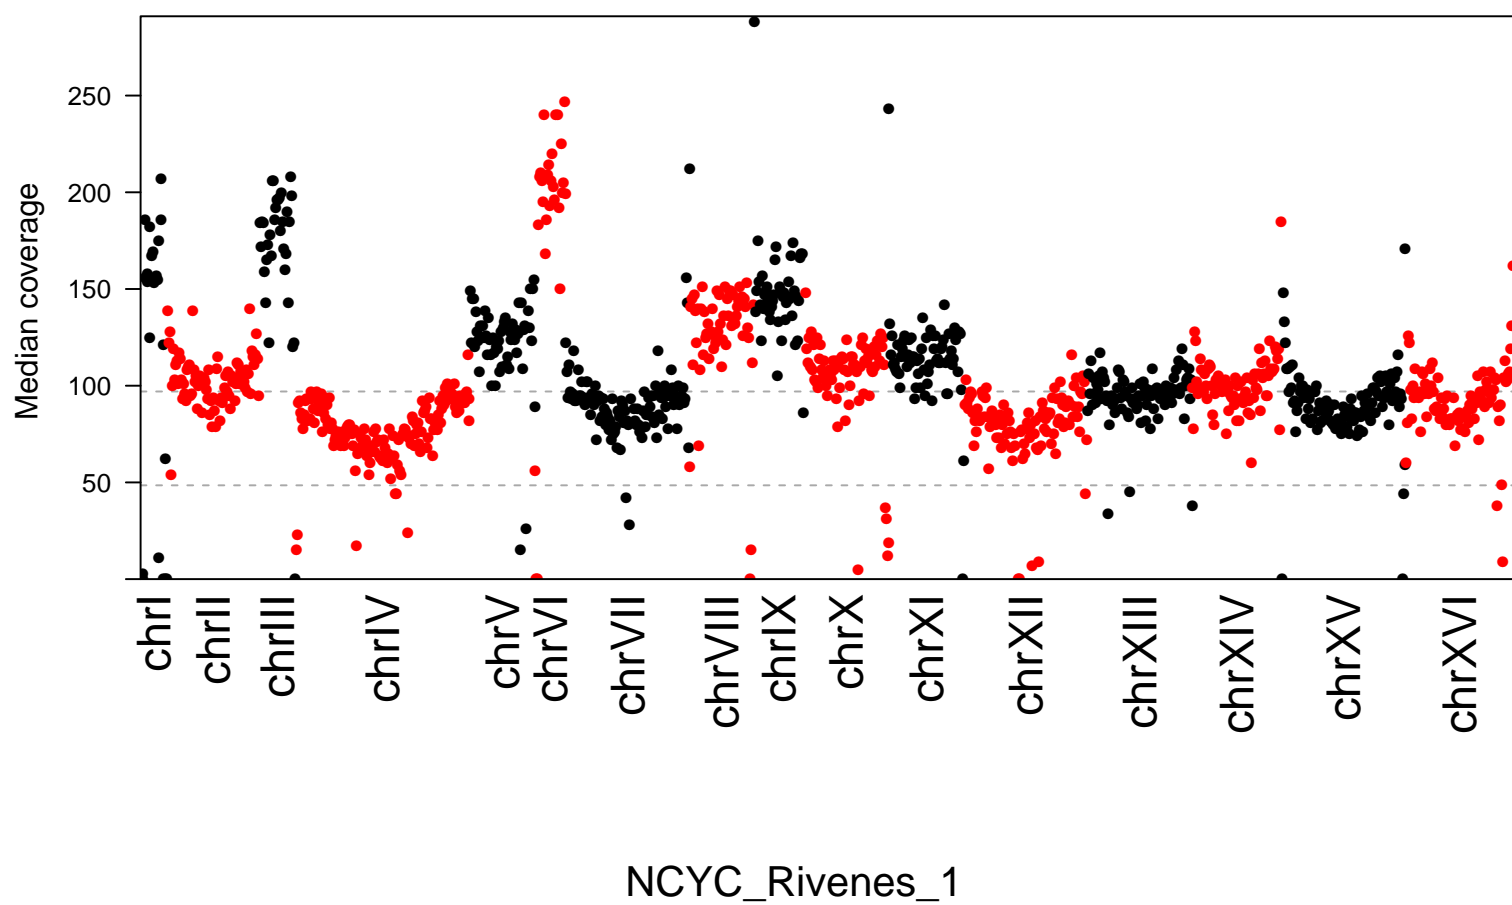

# Supplementary Figure S2

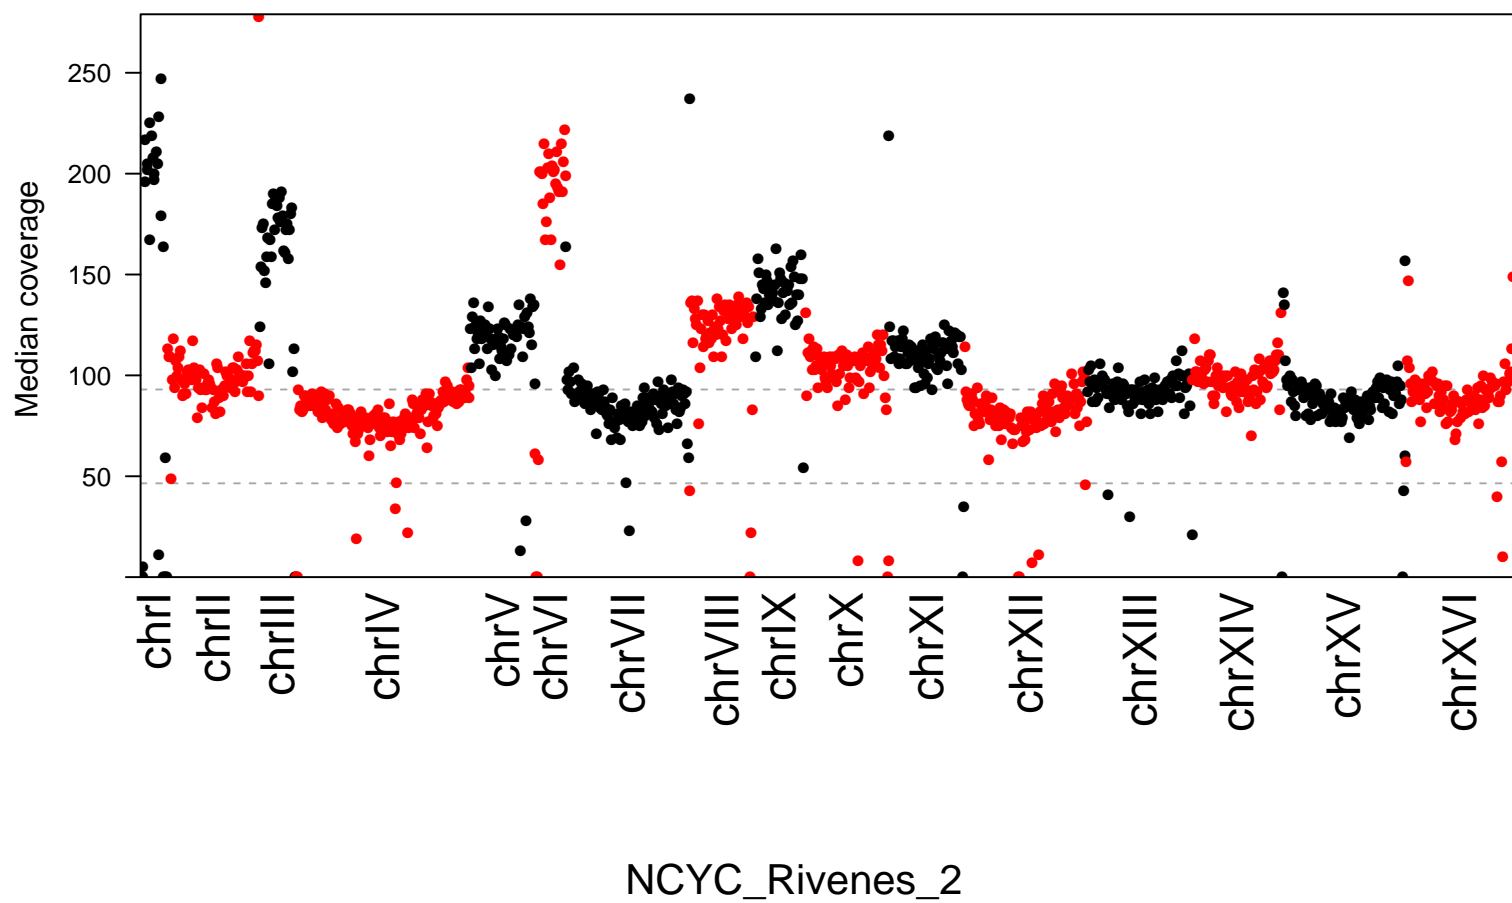

# Supplementary Figure S2

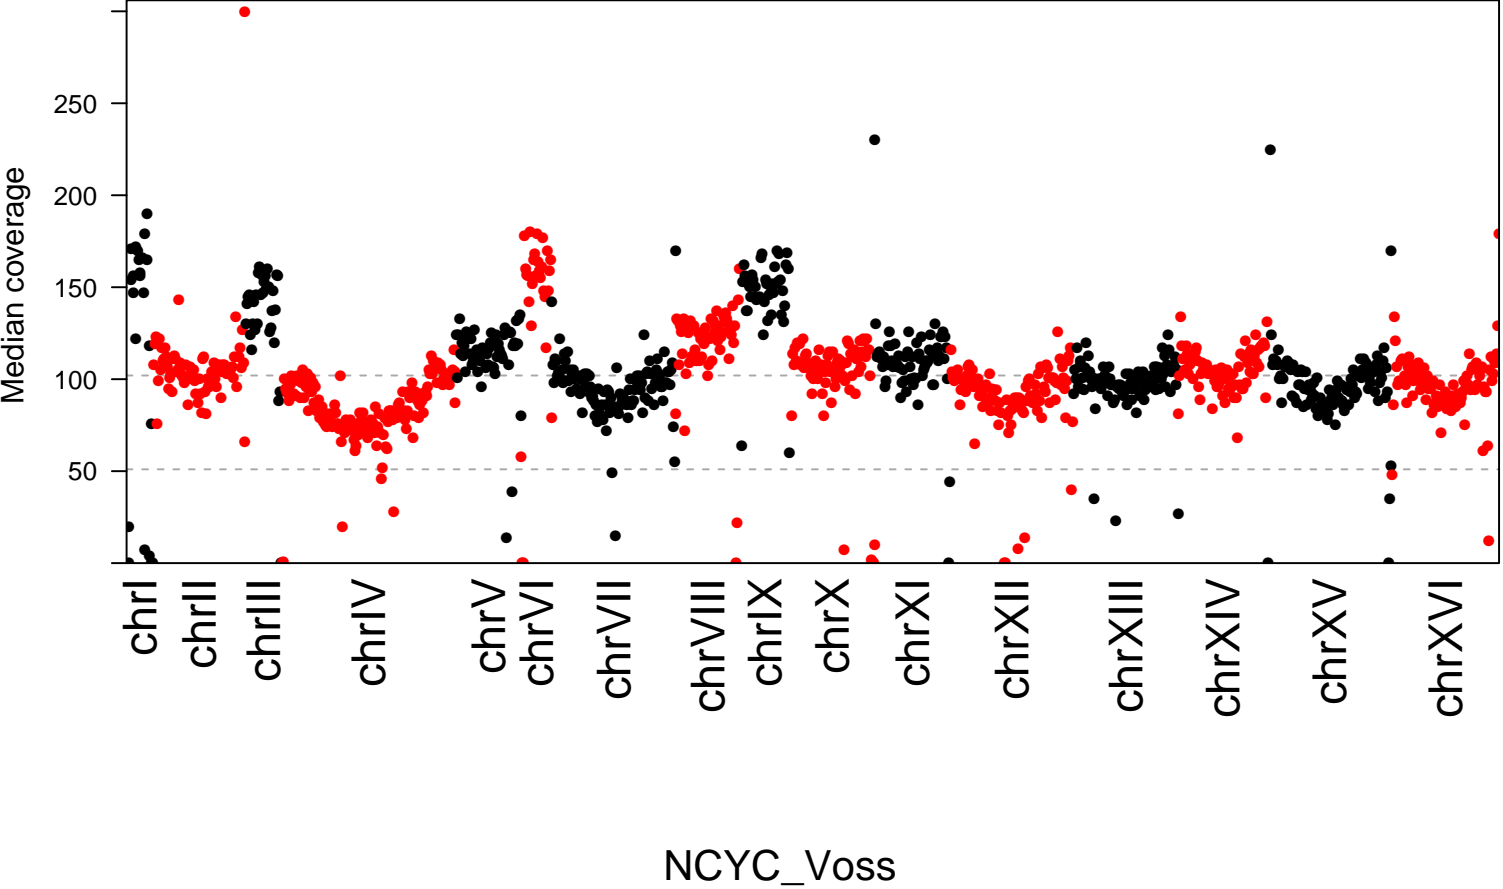



## Supplementary Figure S2

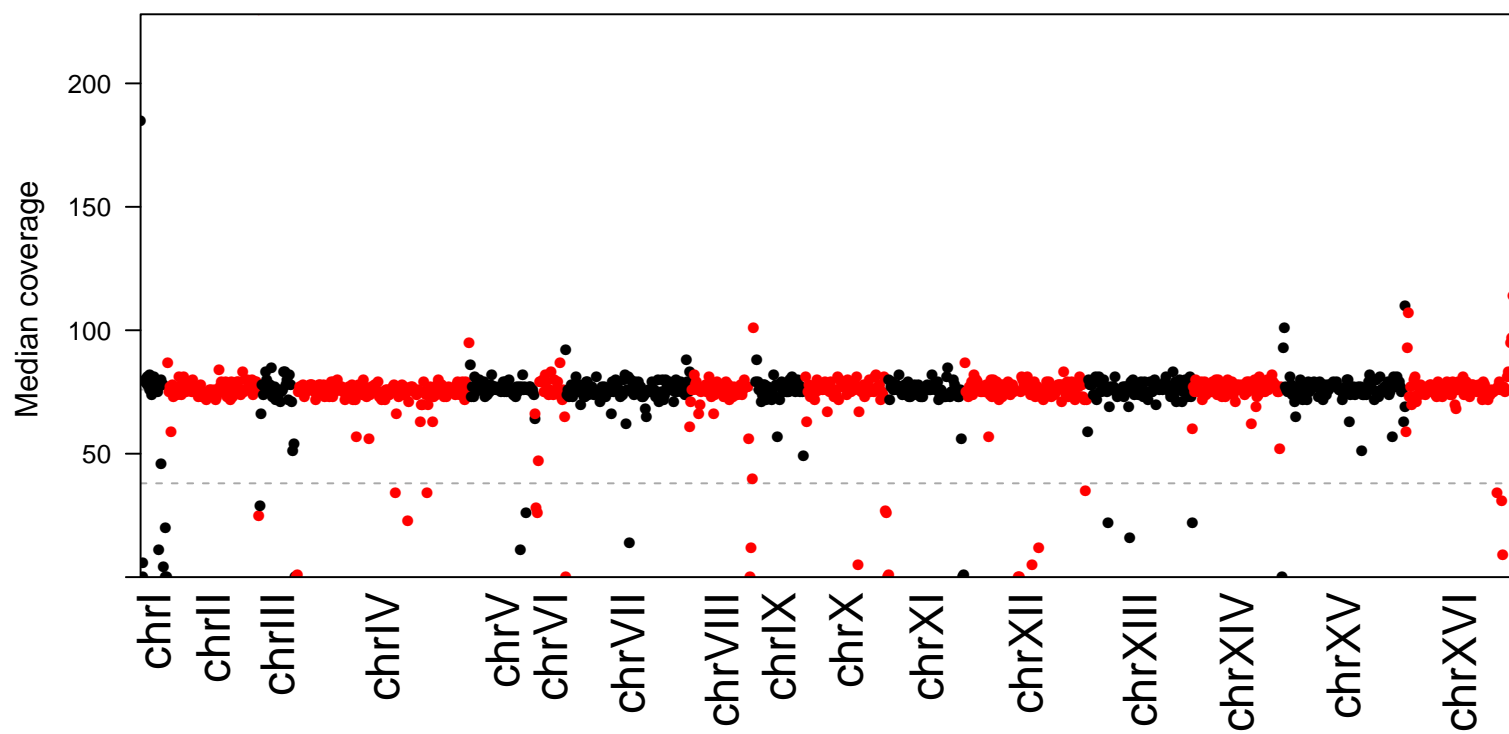

Pundurs\_2

# Supplementary Figure S2

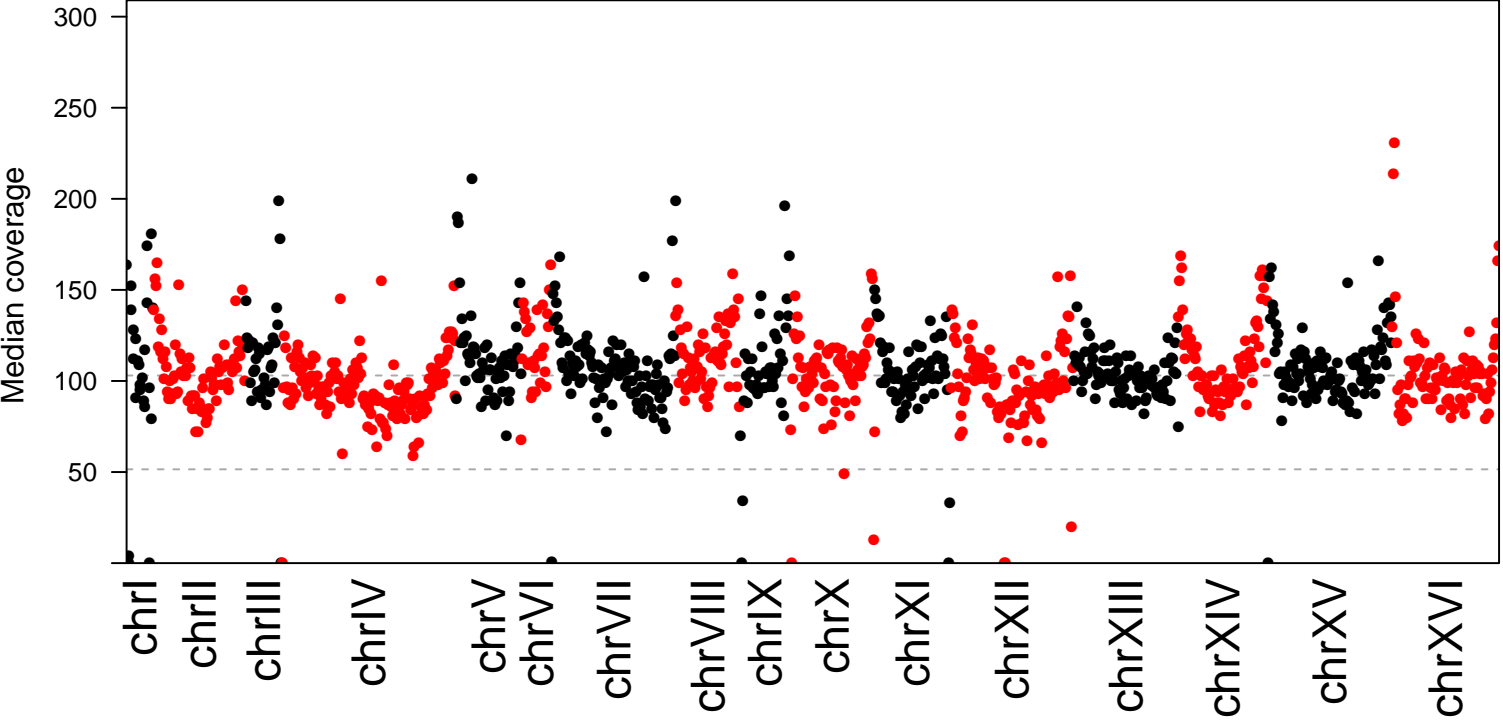

Pundurs1

## Supplementary Figure S2

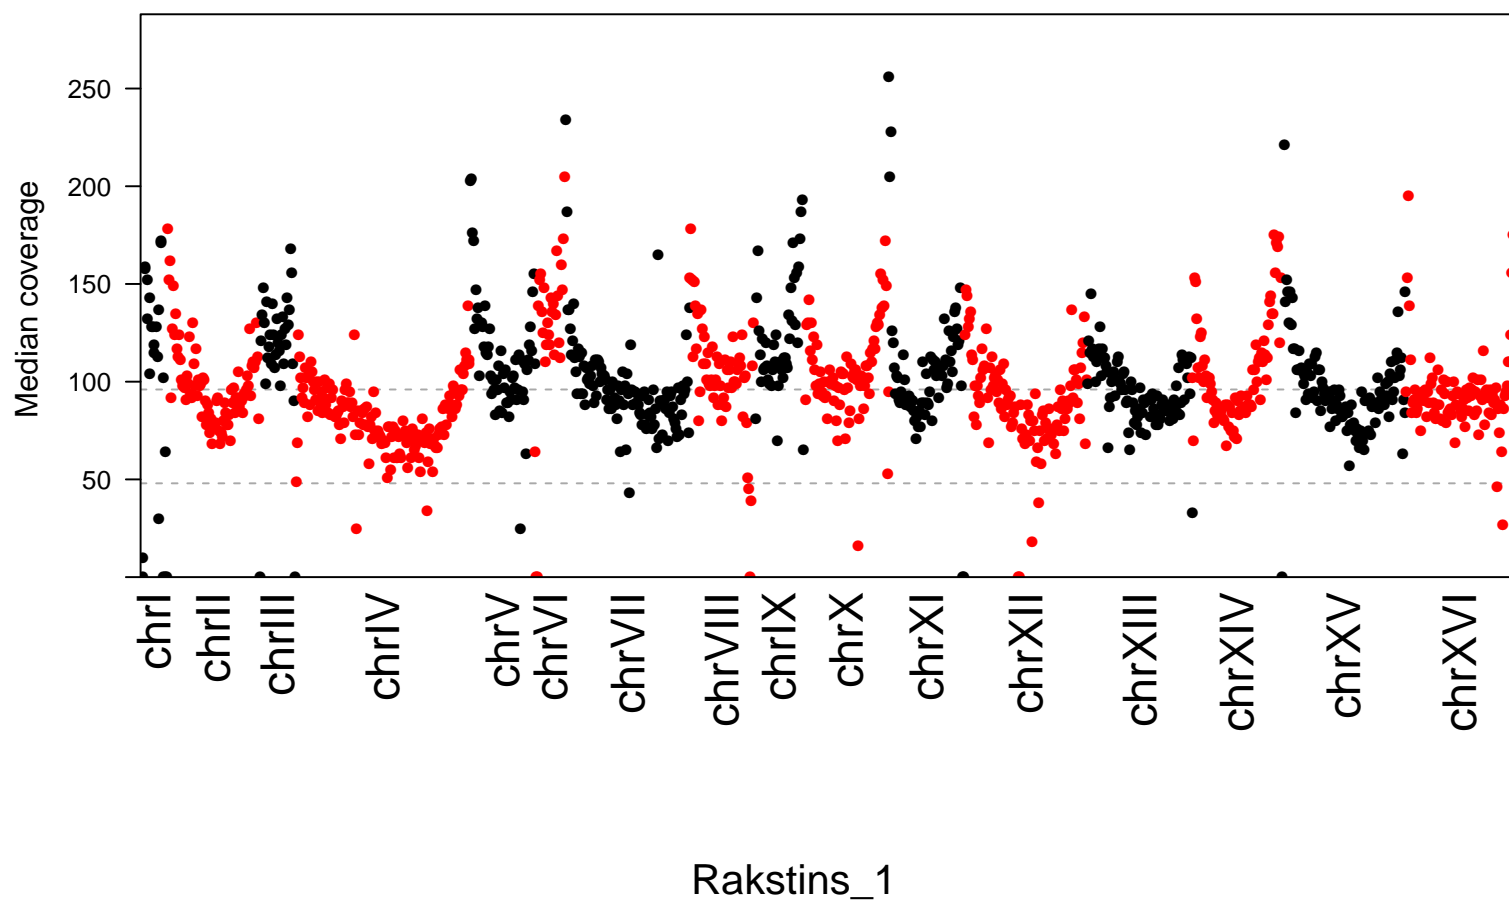

# Supplementary Figure S2

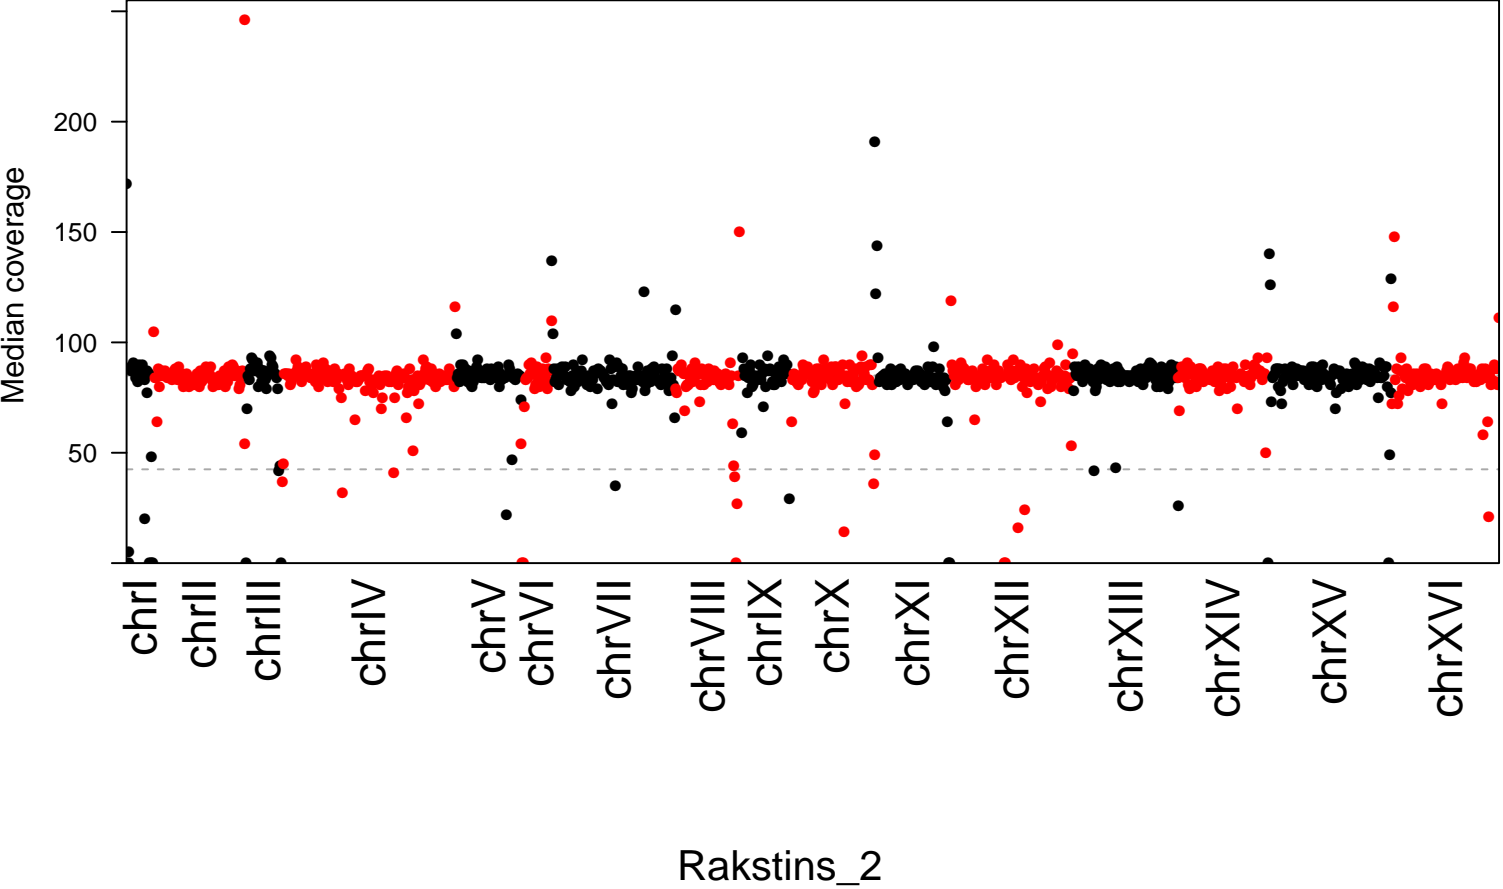

# Supplementary Figure S2

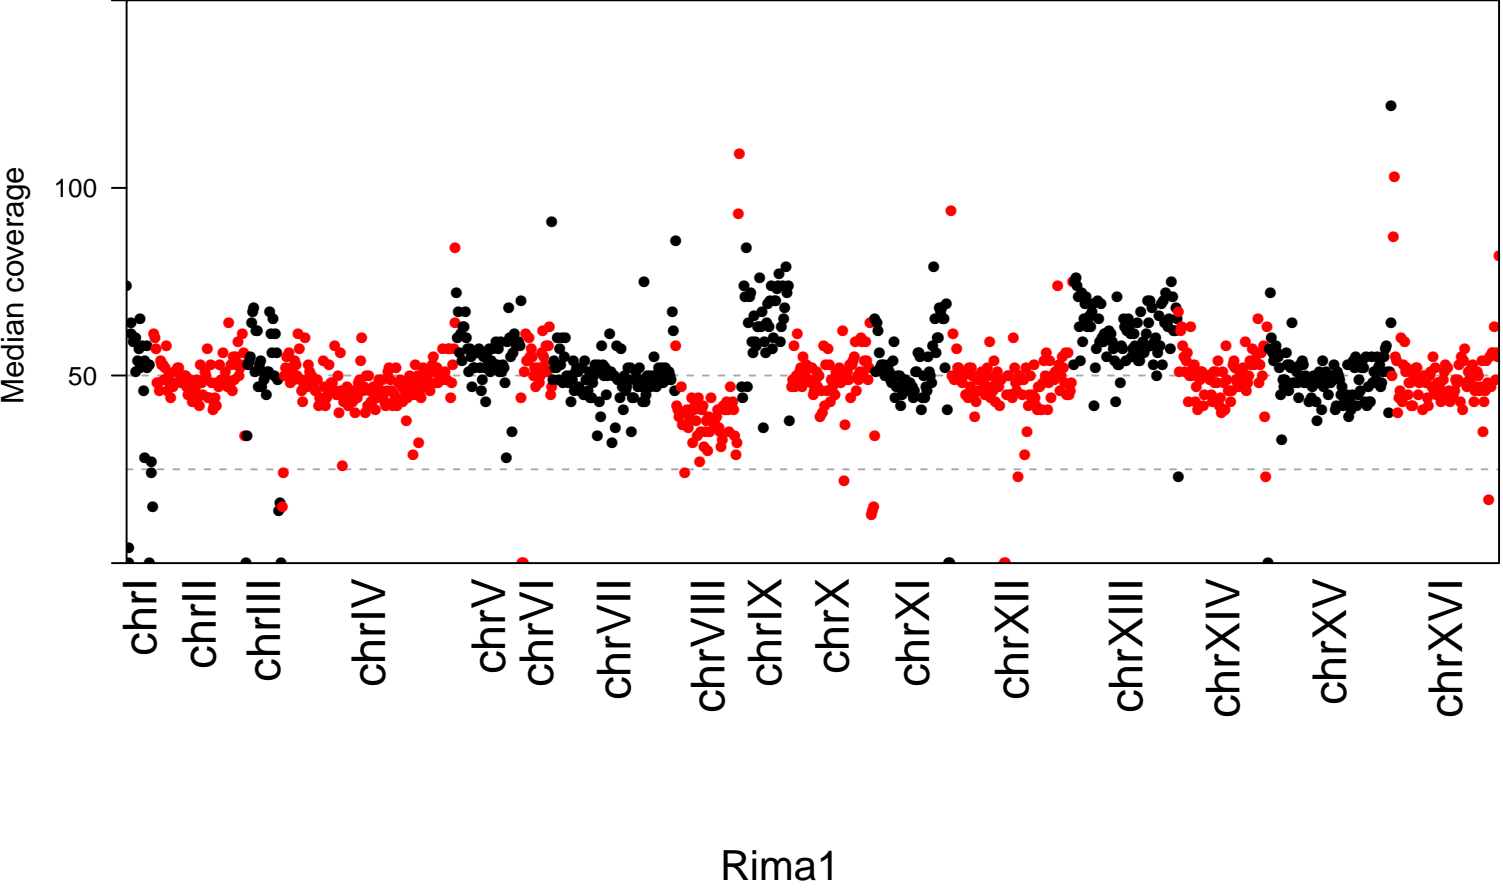

# Supplementary Figure S2

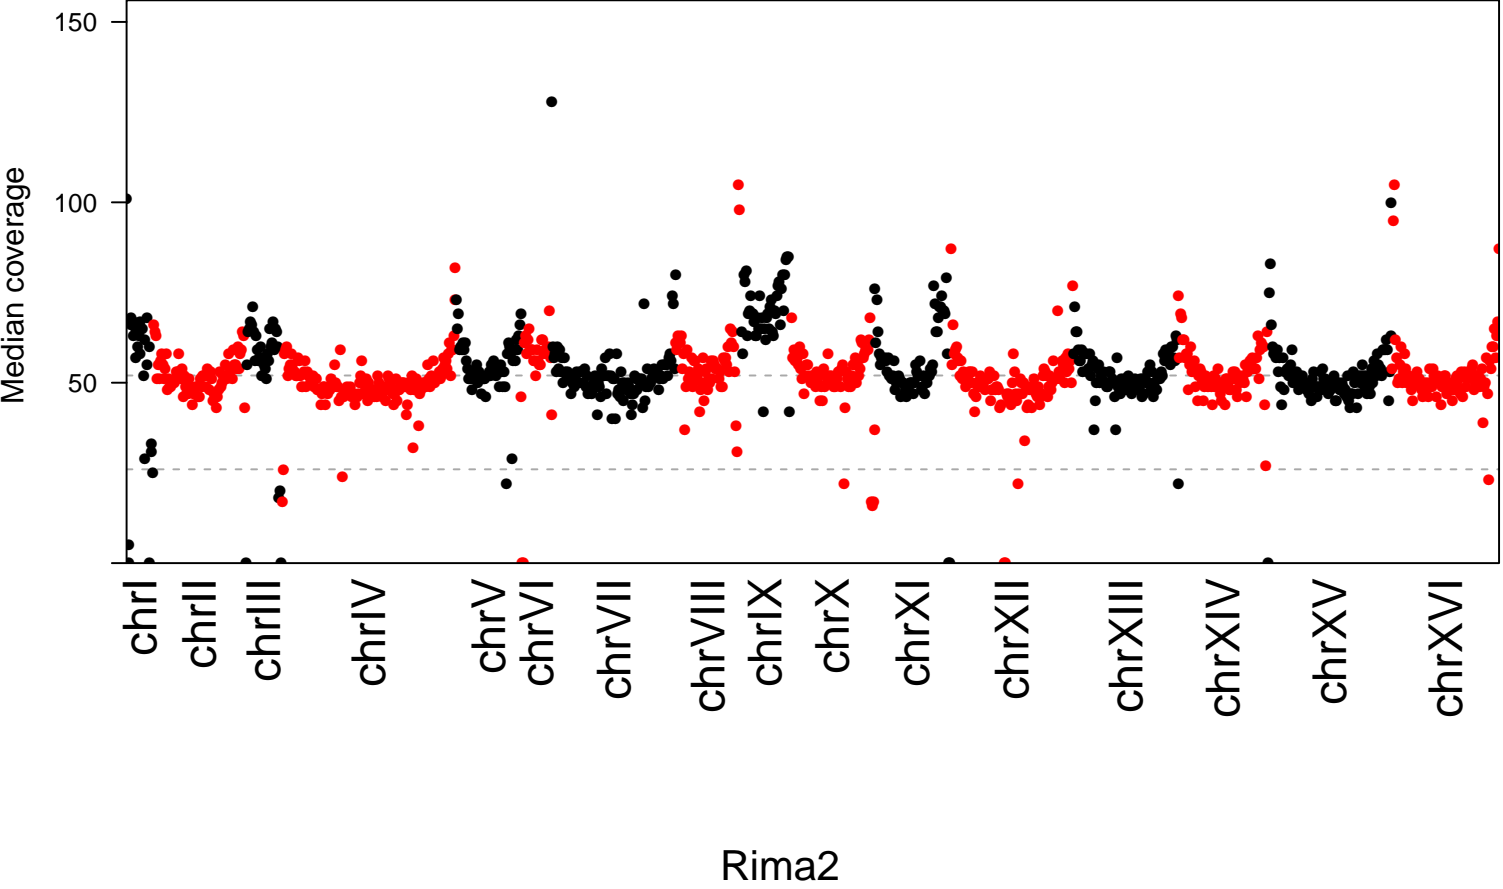

Supplementary Figure S2

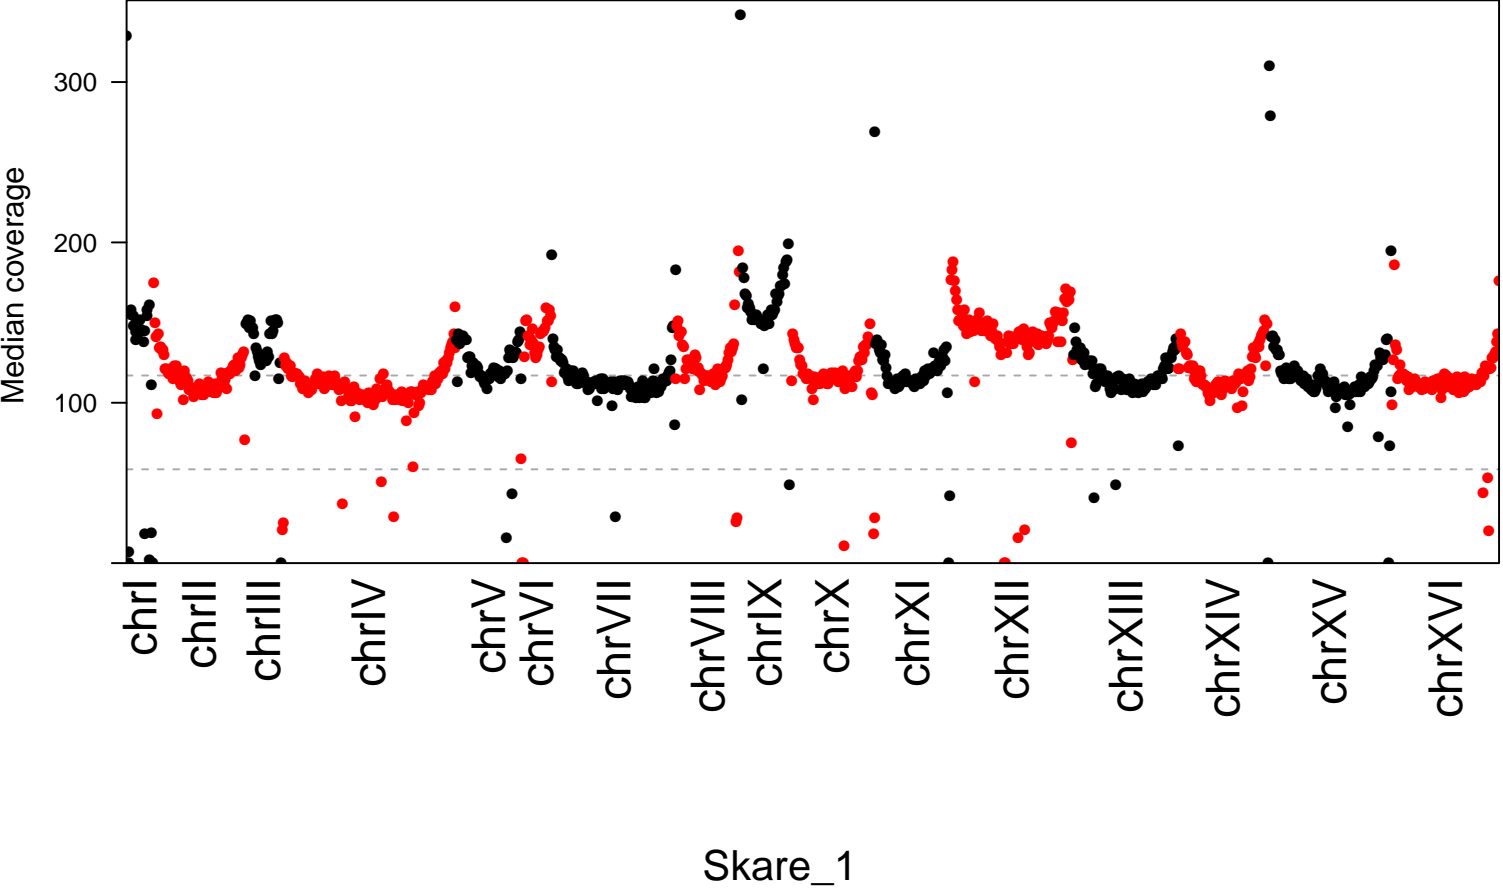

# Supplementary Figure S2

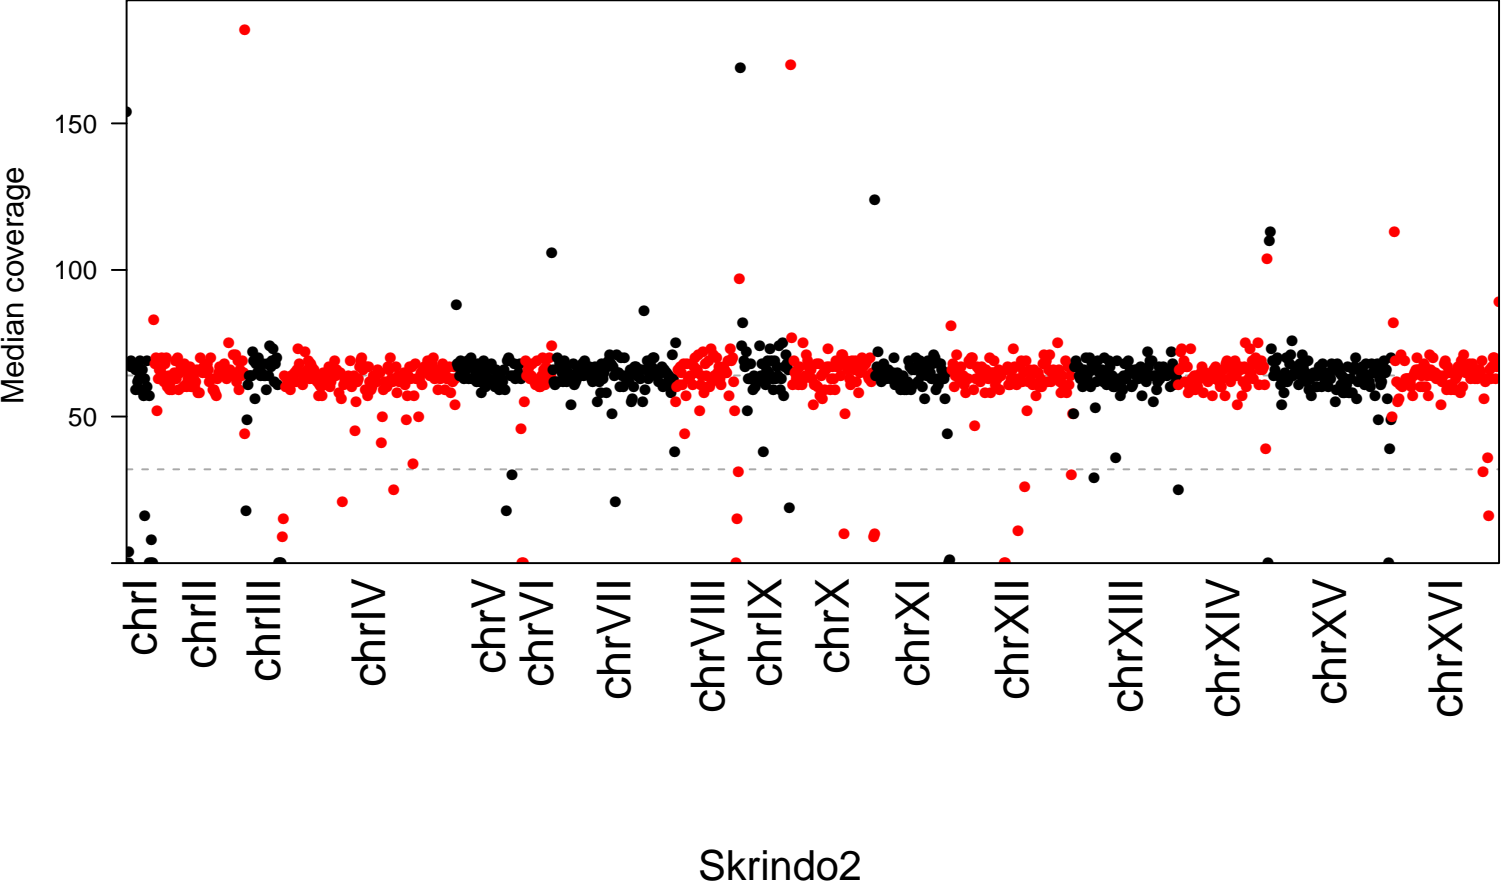



# Supplementary Figure S2

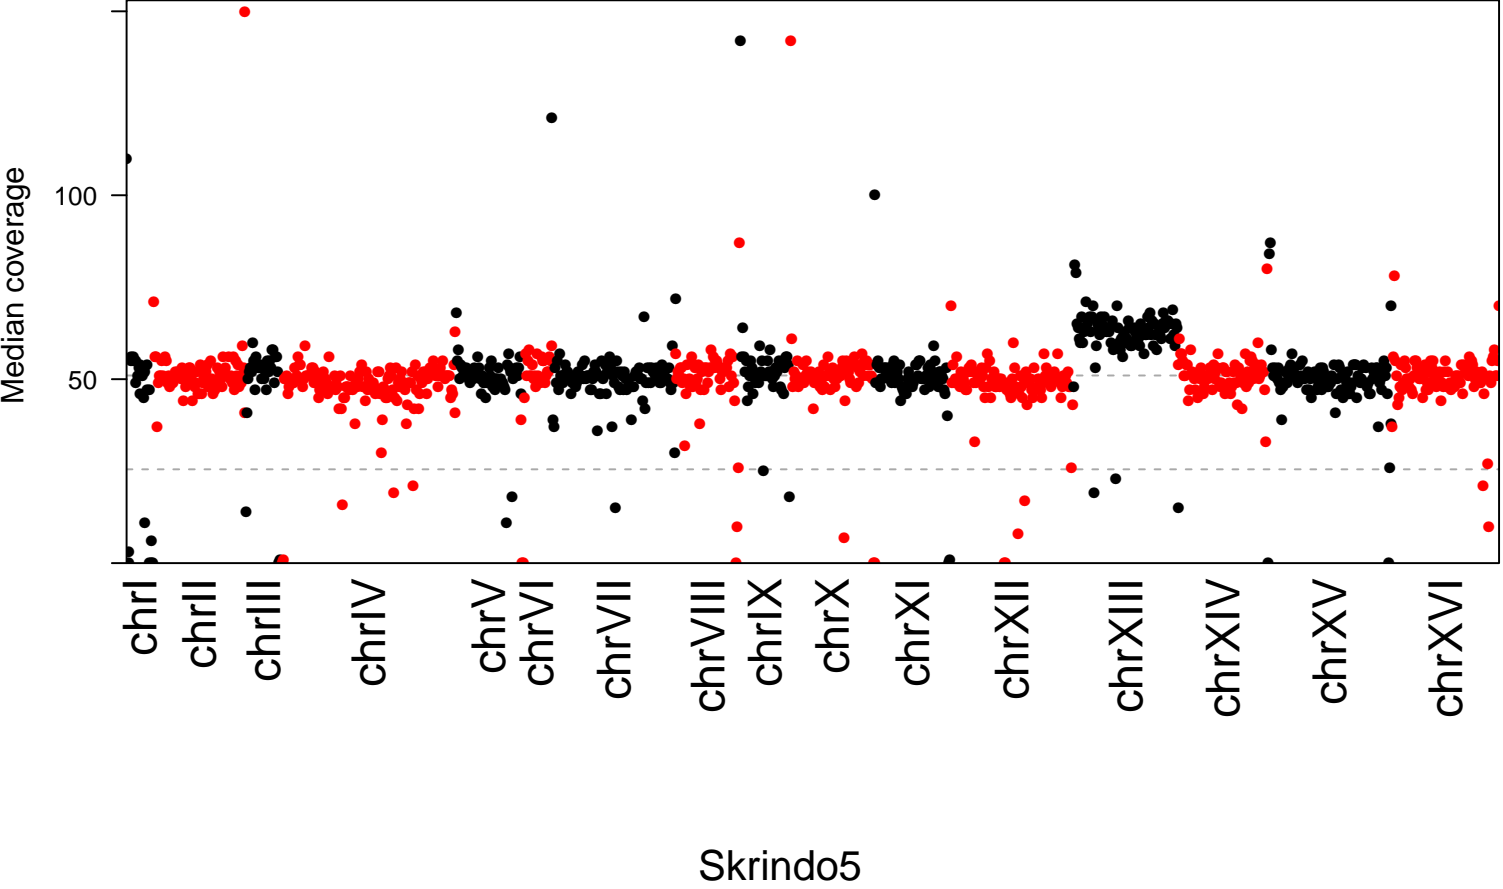

## Supplementary Figure S2

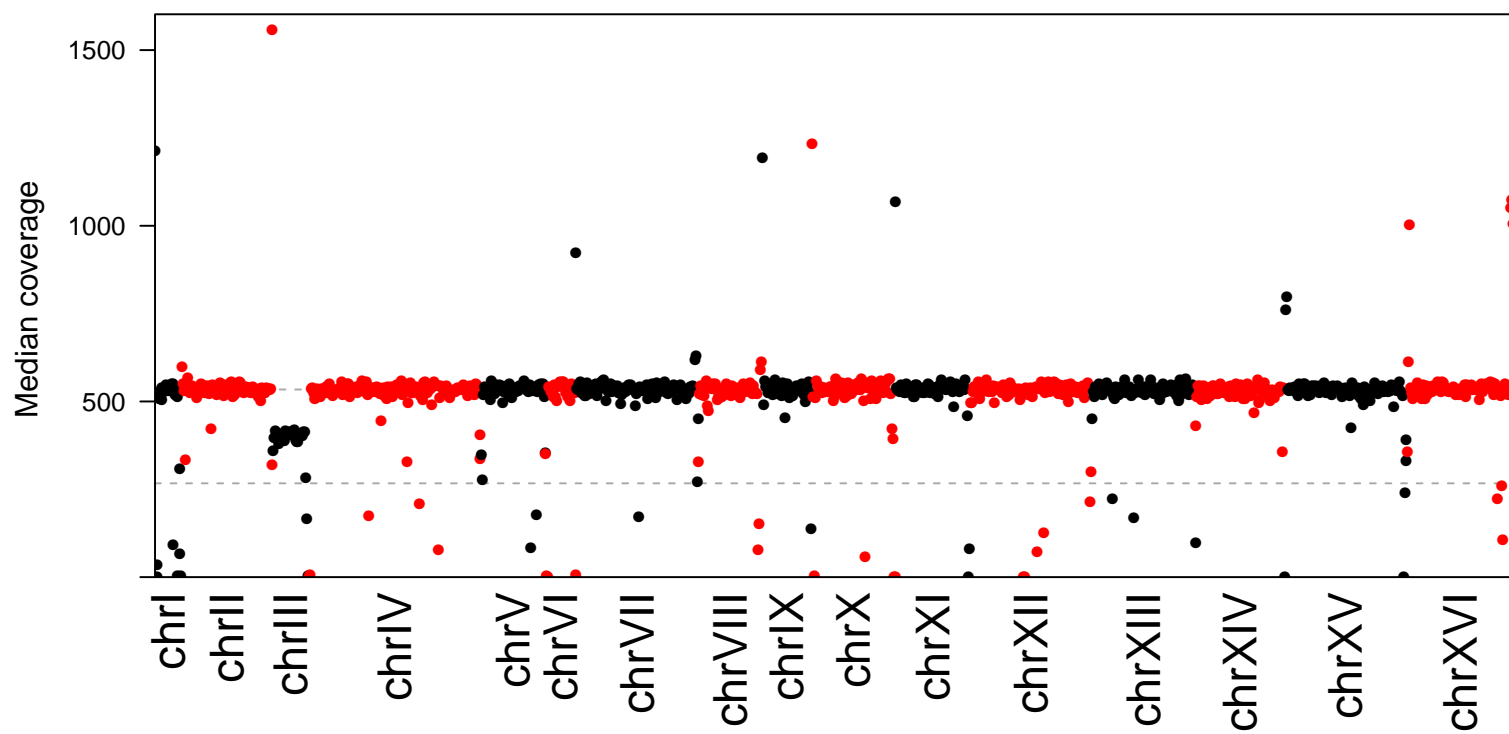

Stordal\_Ebbegarden\_1

## Supplementary Figure S2

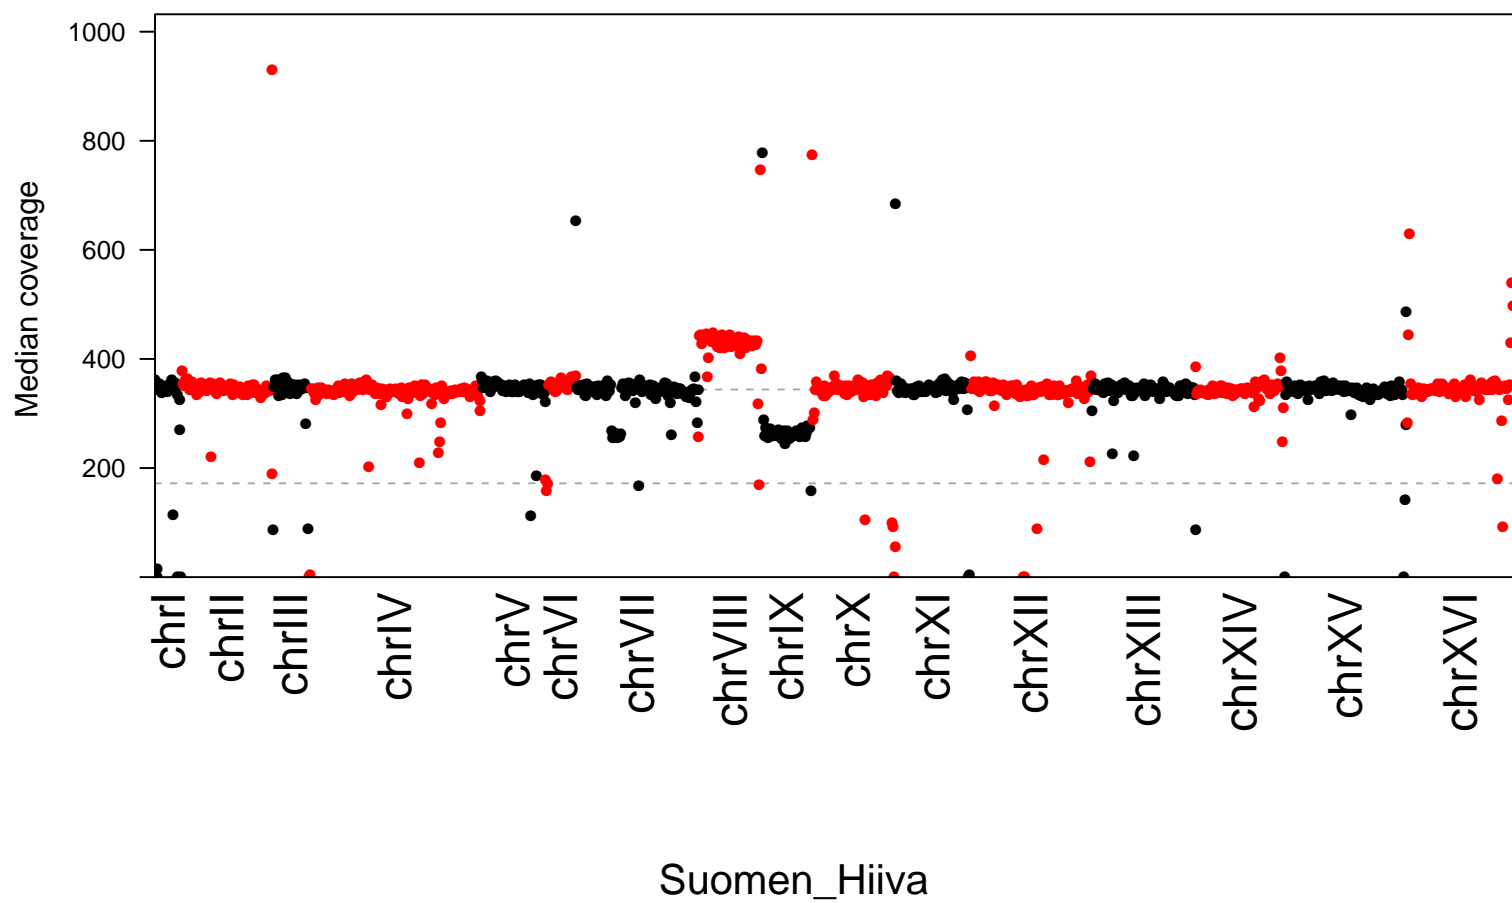

# Supplementary Figure S2

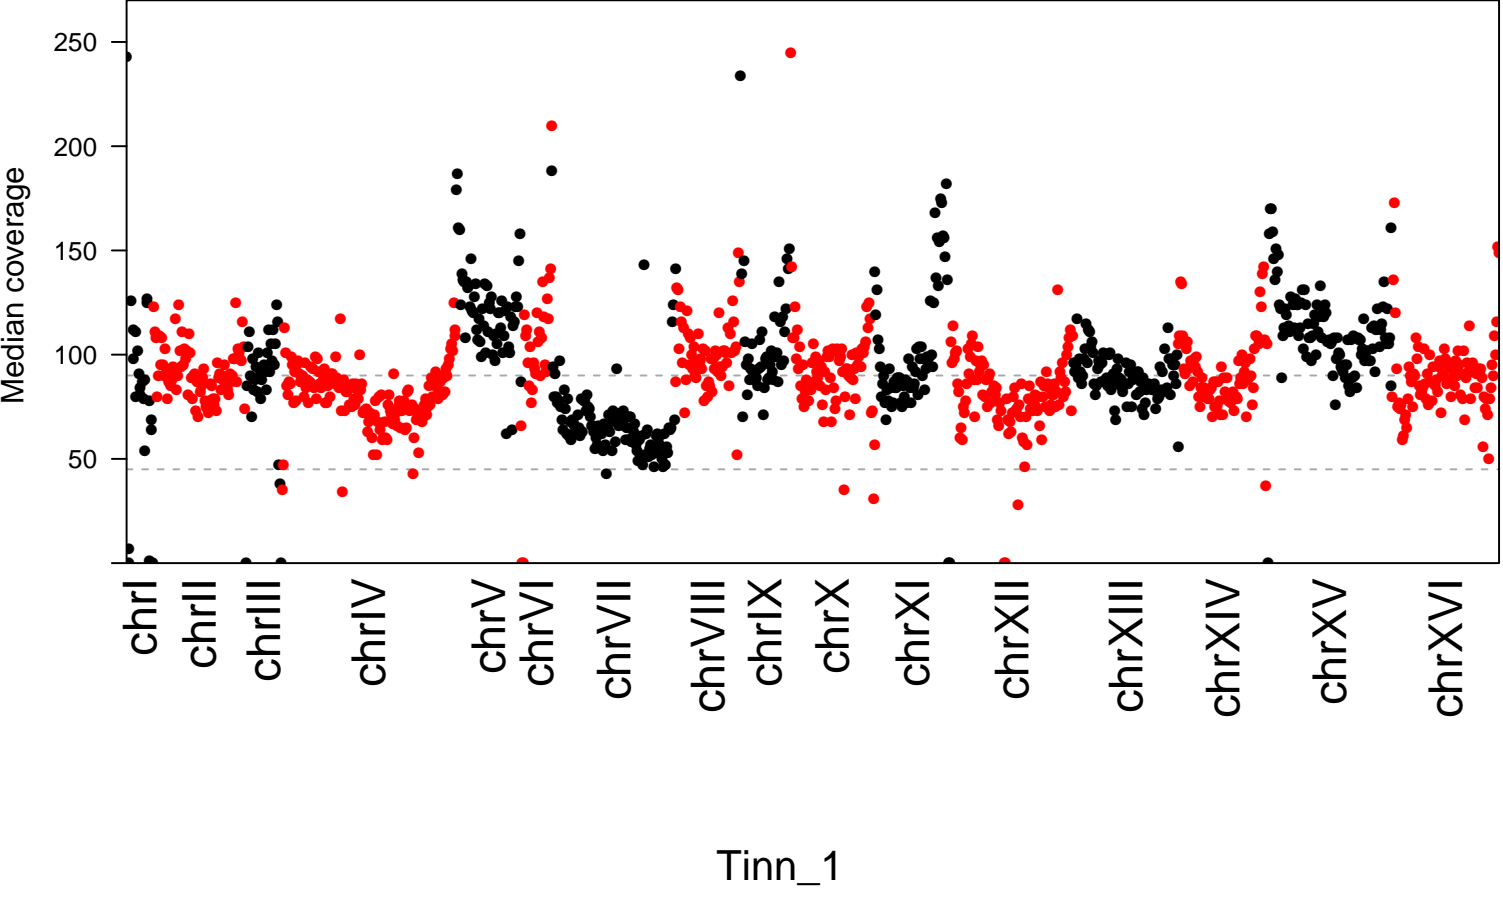

## Supplementary Figure S2

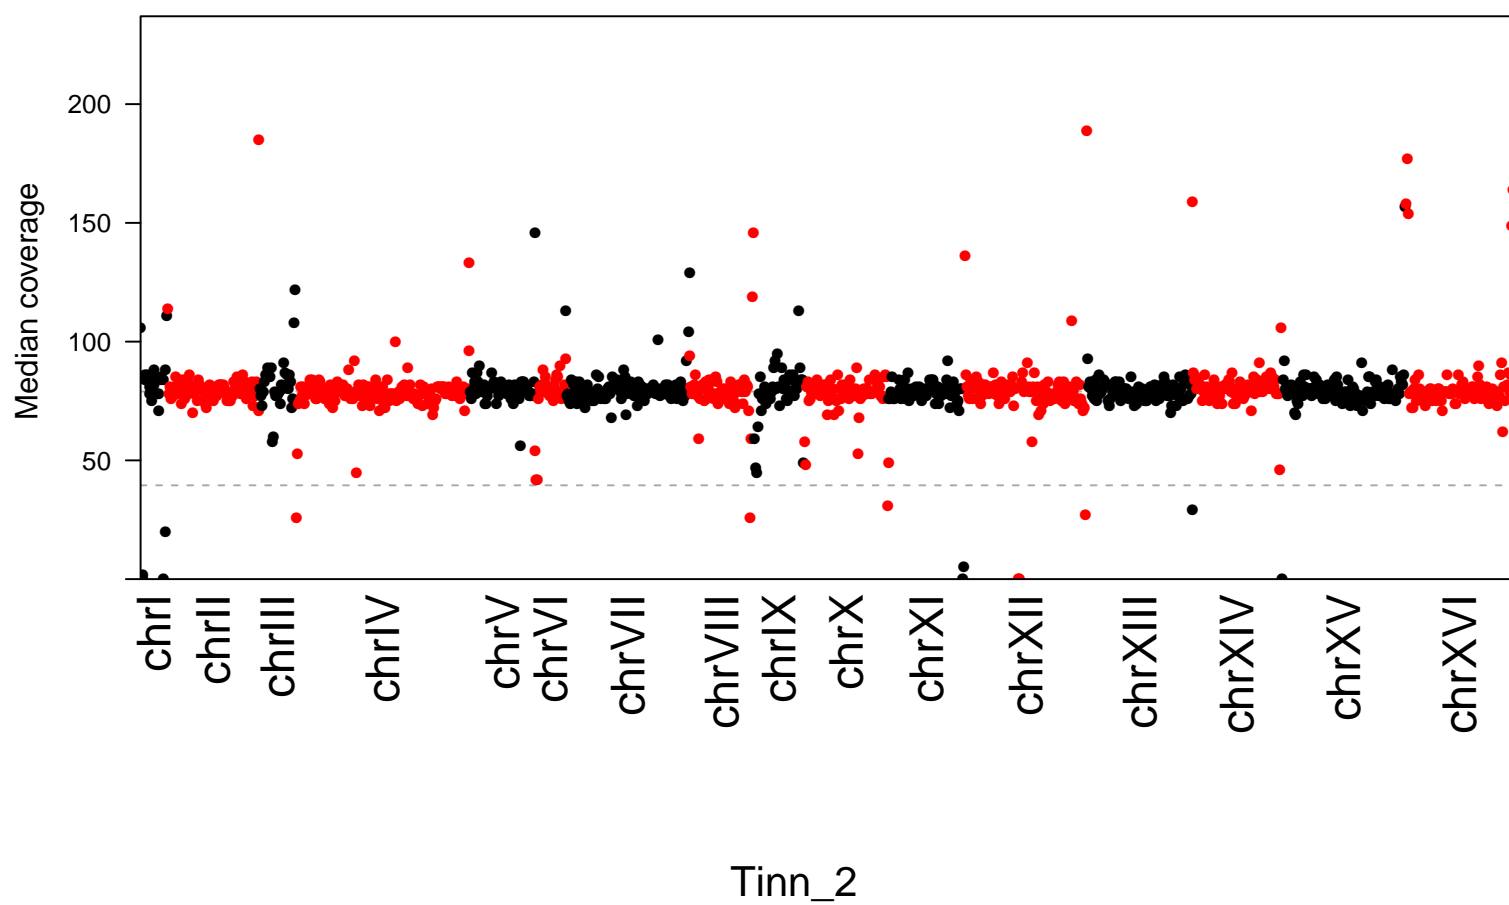

Supplementary Figure S2

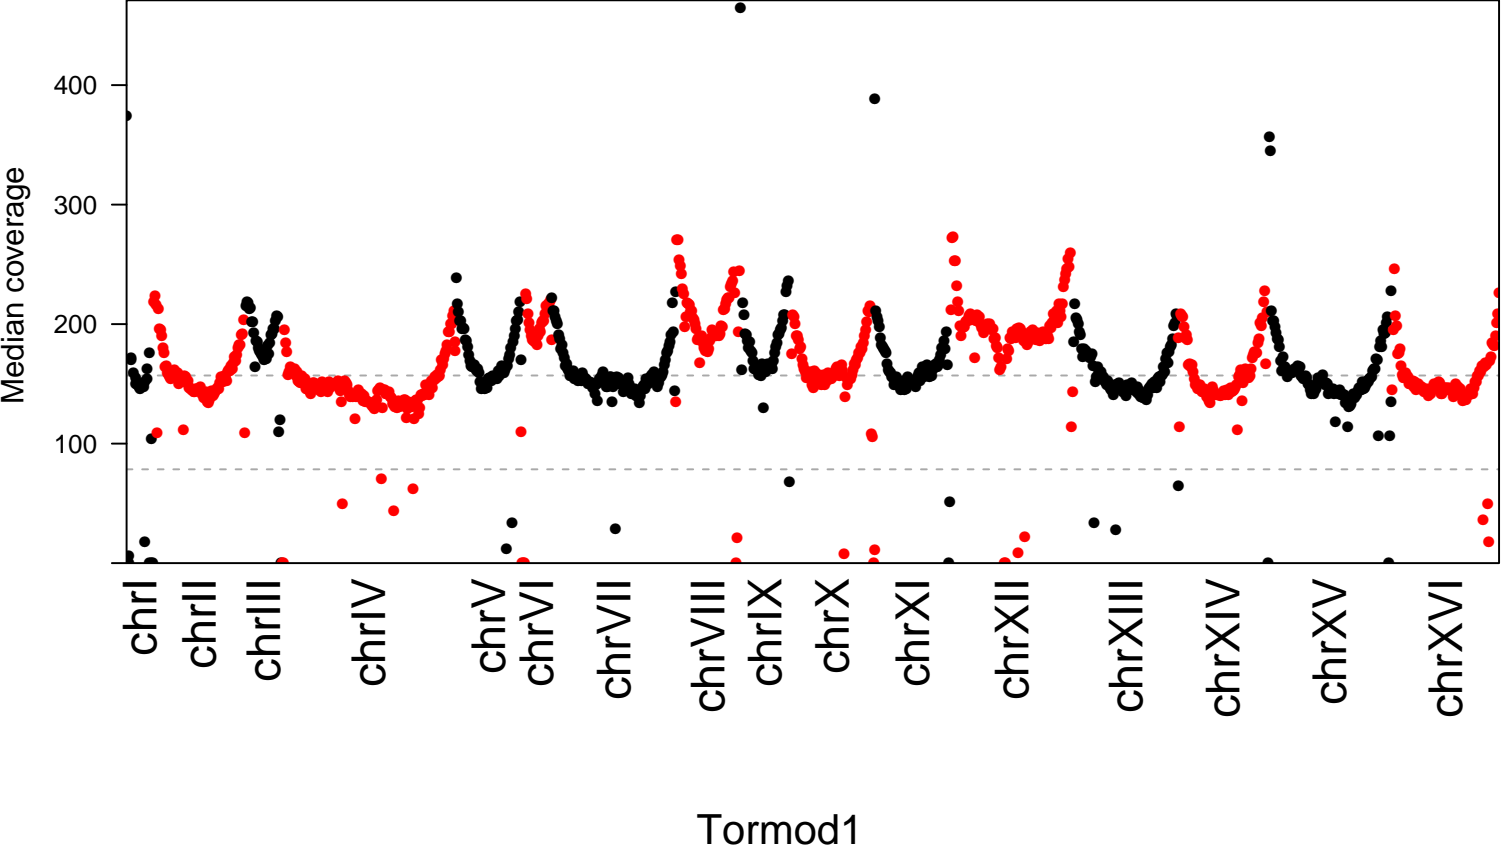

Supplementary Figure S2

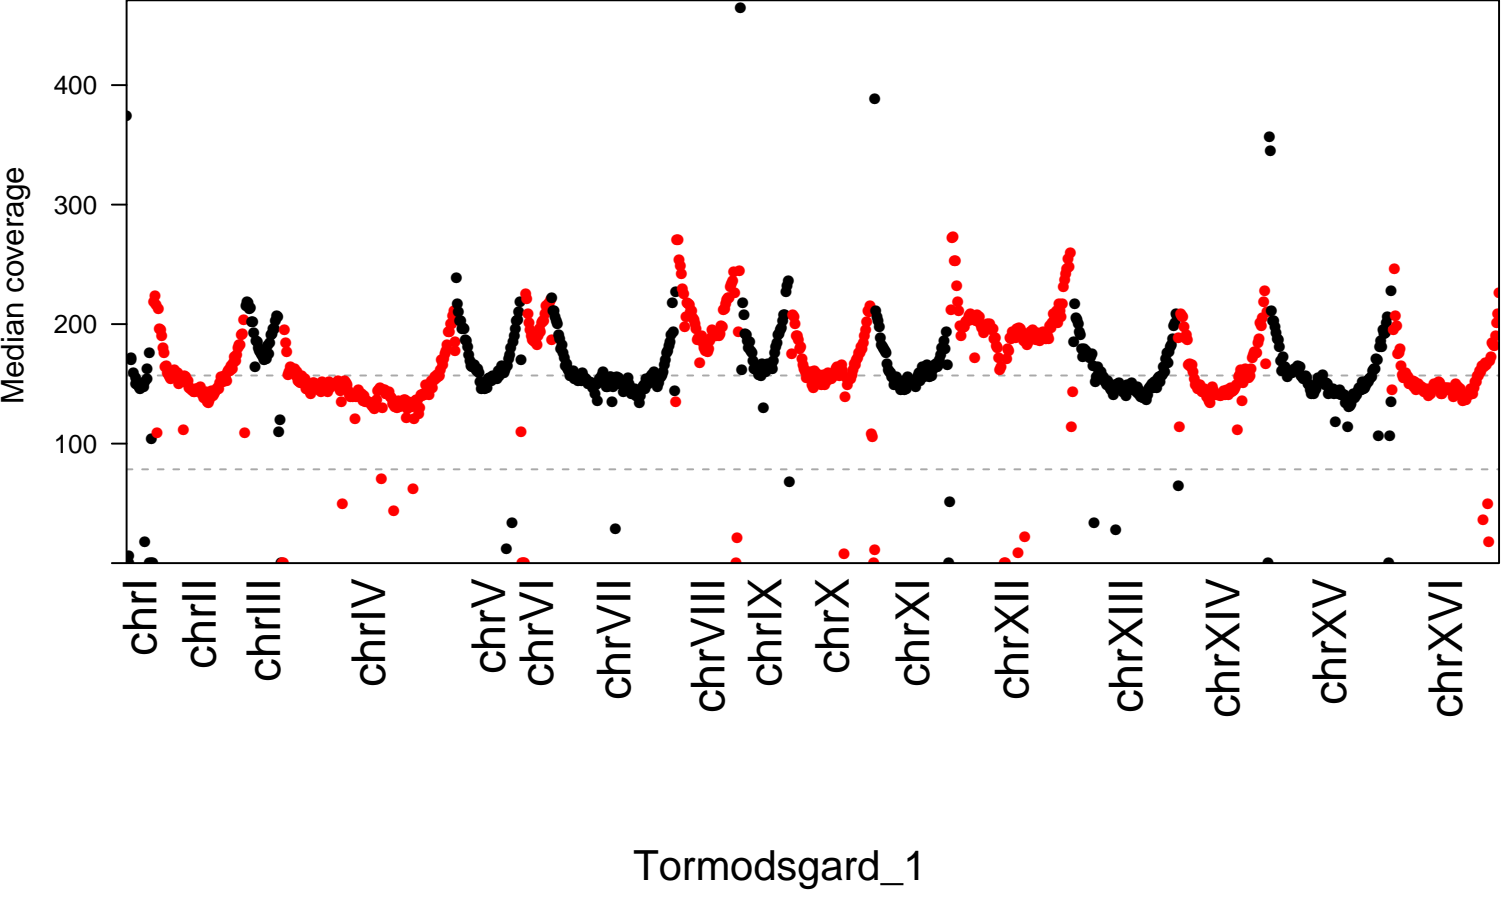

# Supplementary Figure S2

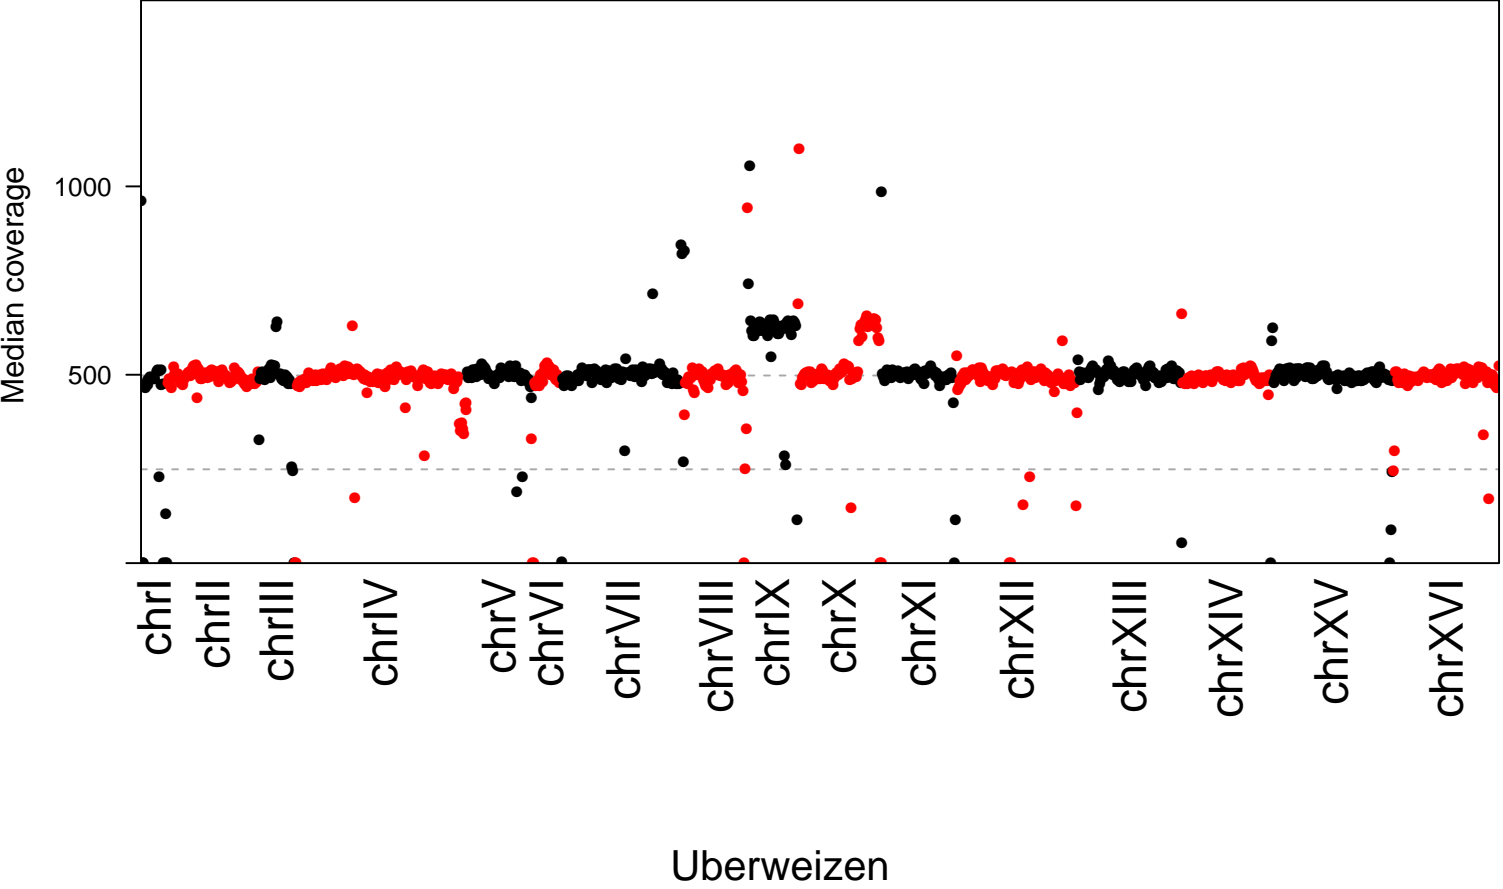



## Supplementary Figure S2

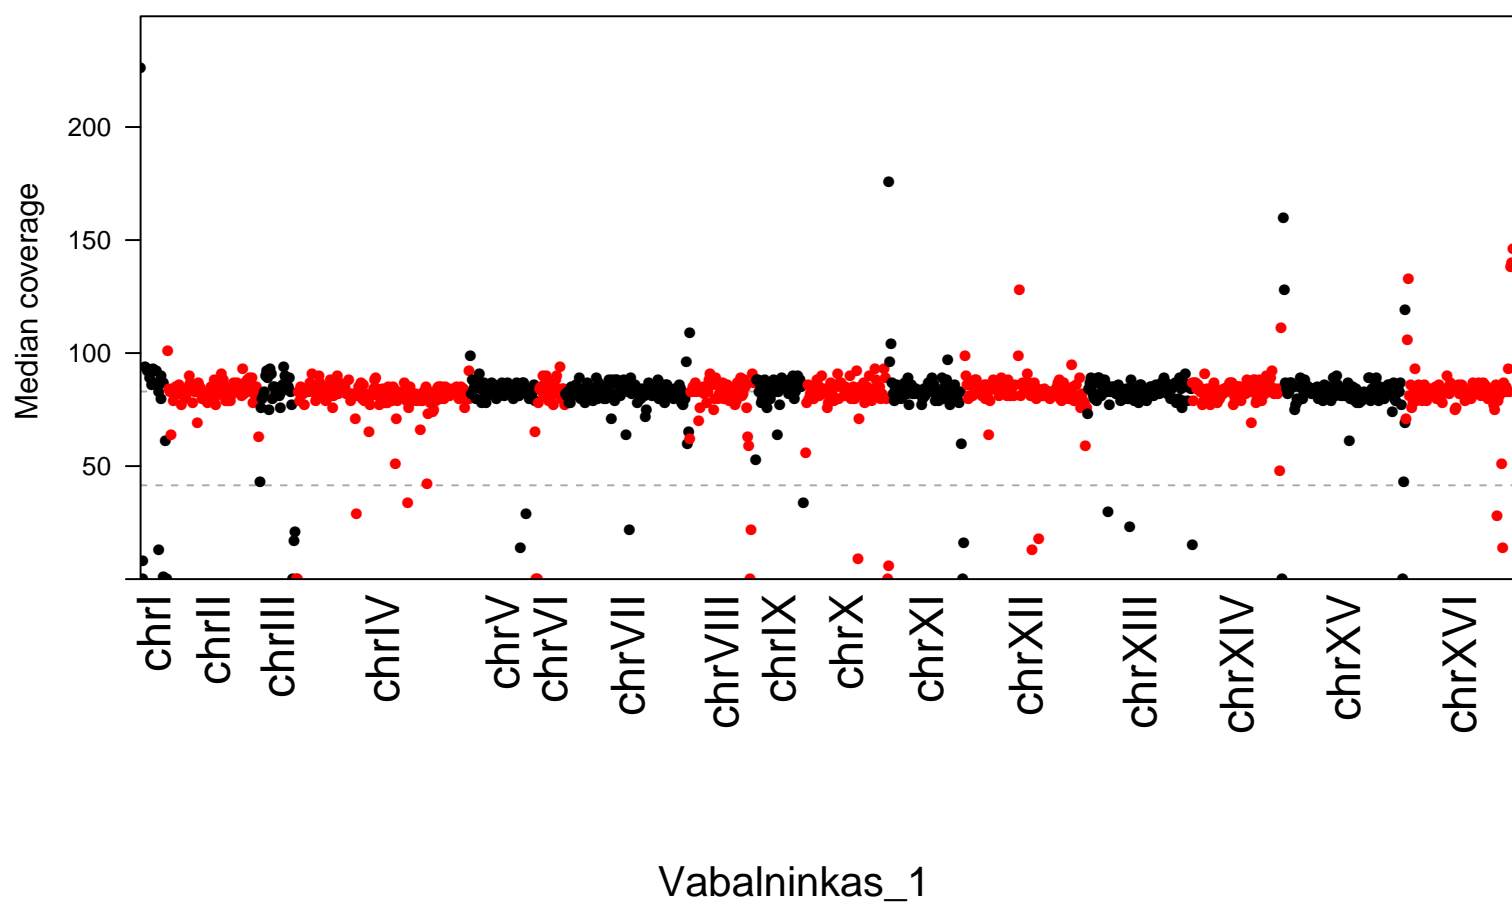

Supplementary Figure S2

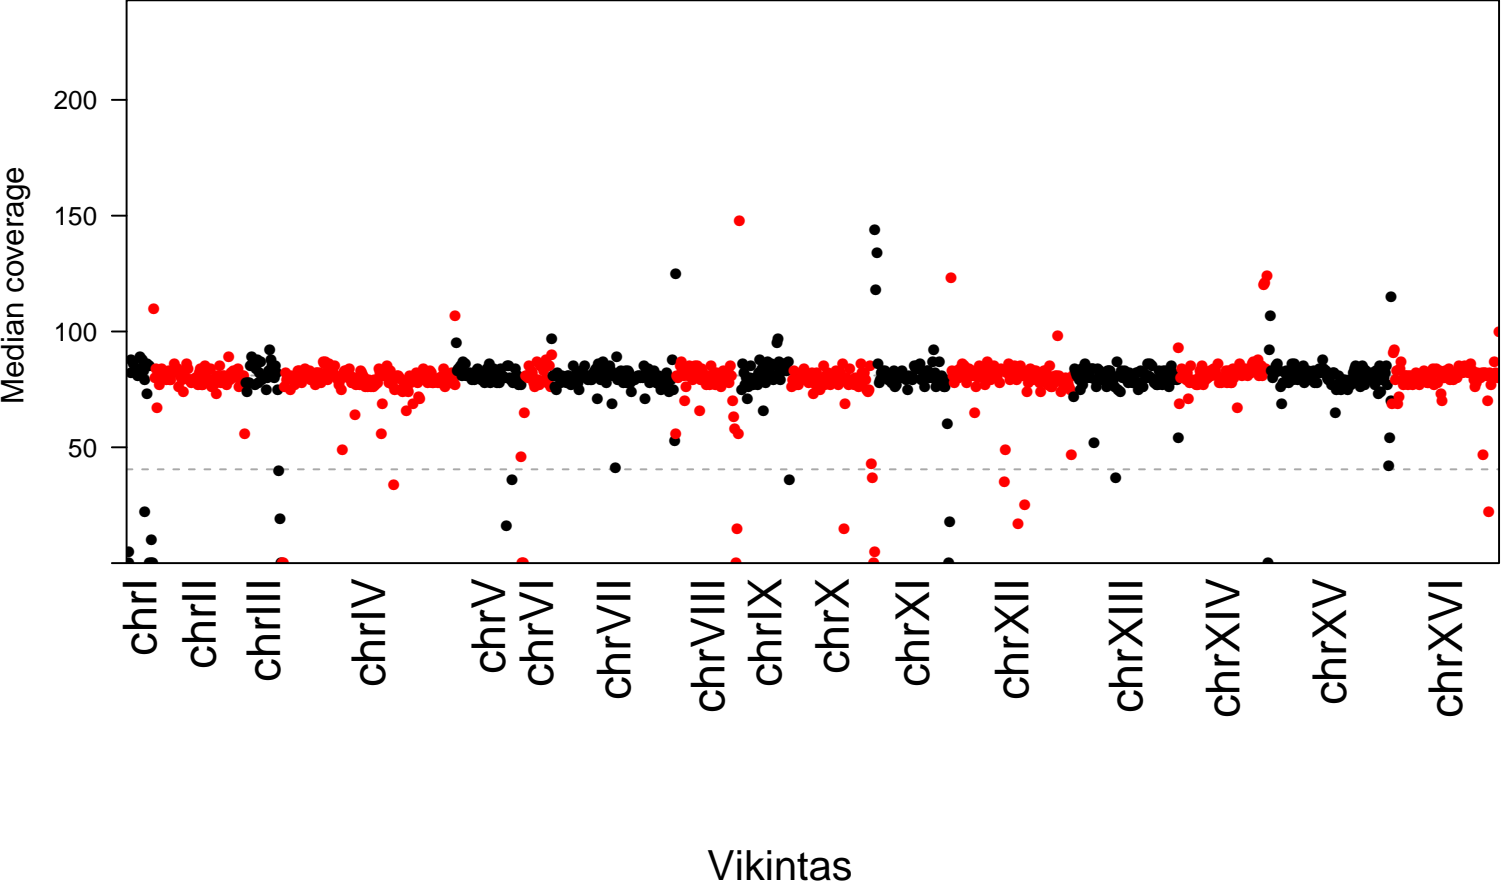

# Supplementary Figure S2

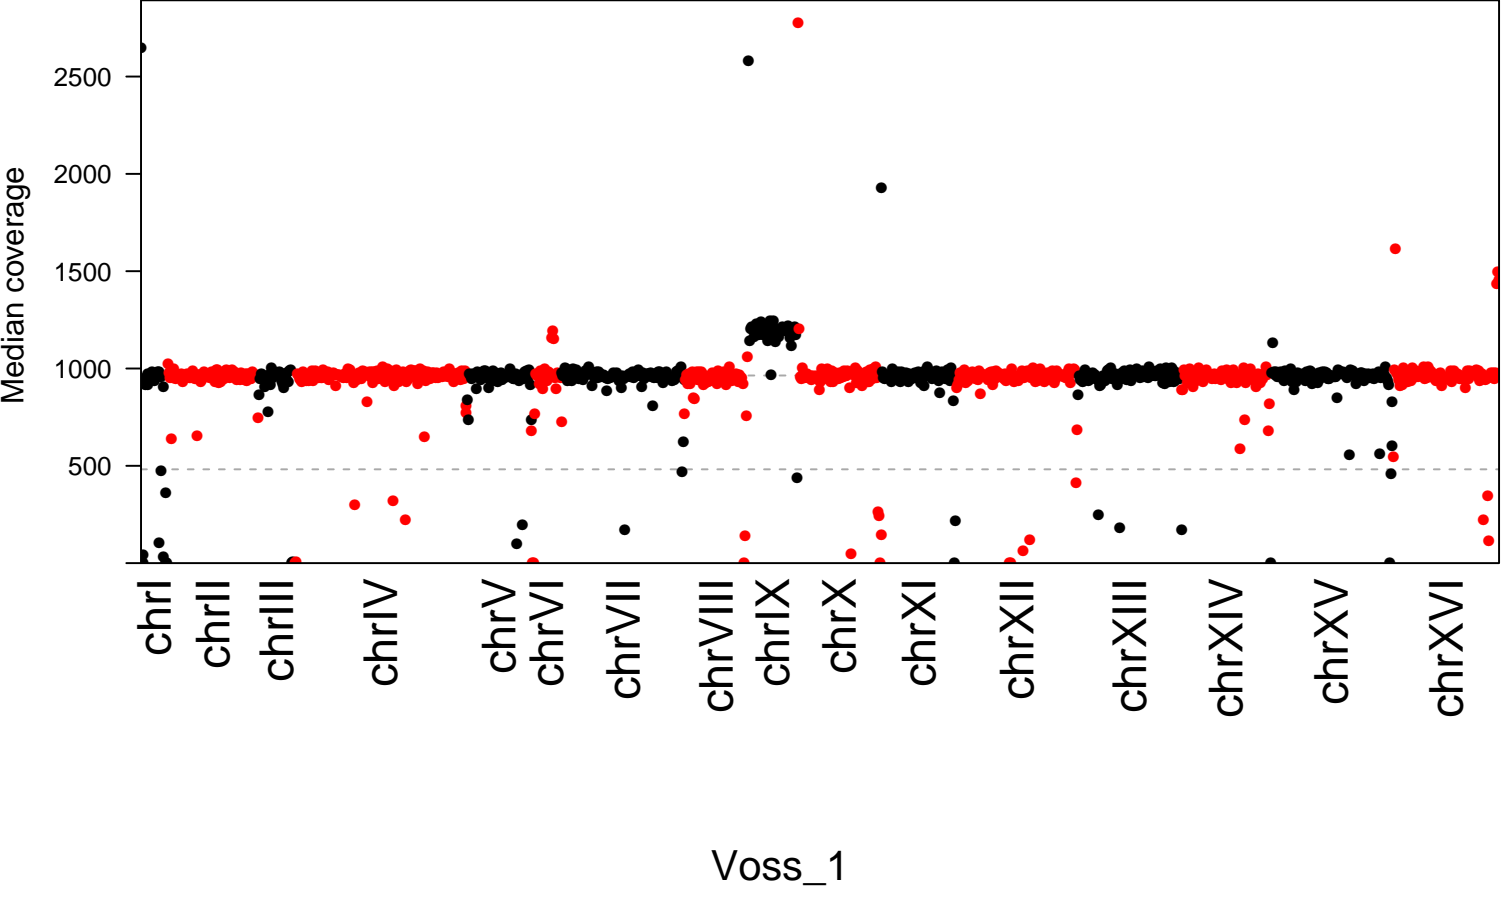

# Supplementary Figure S2

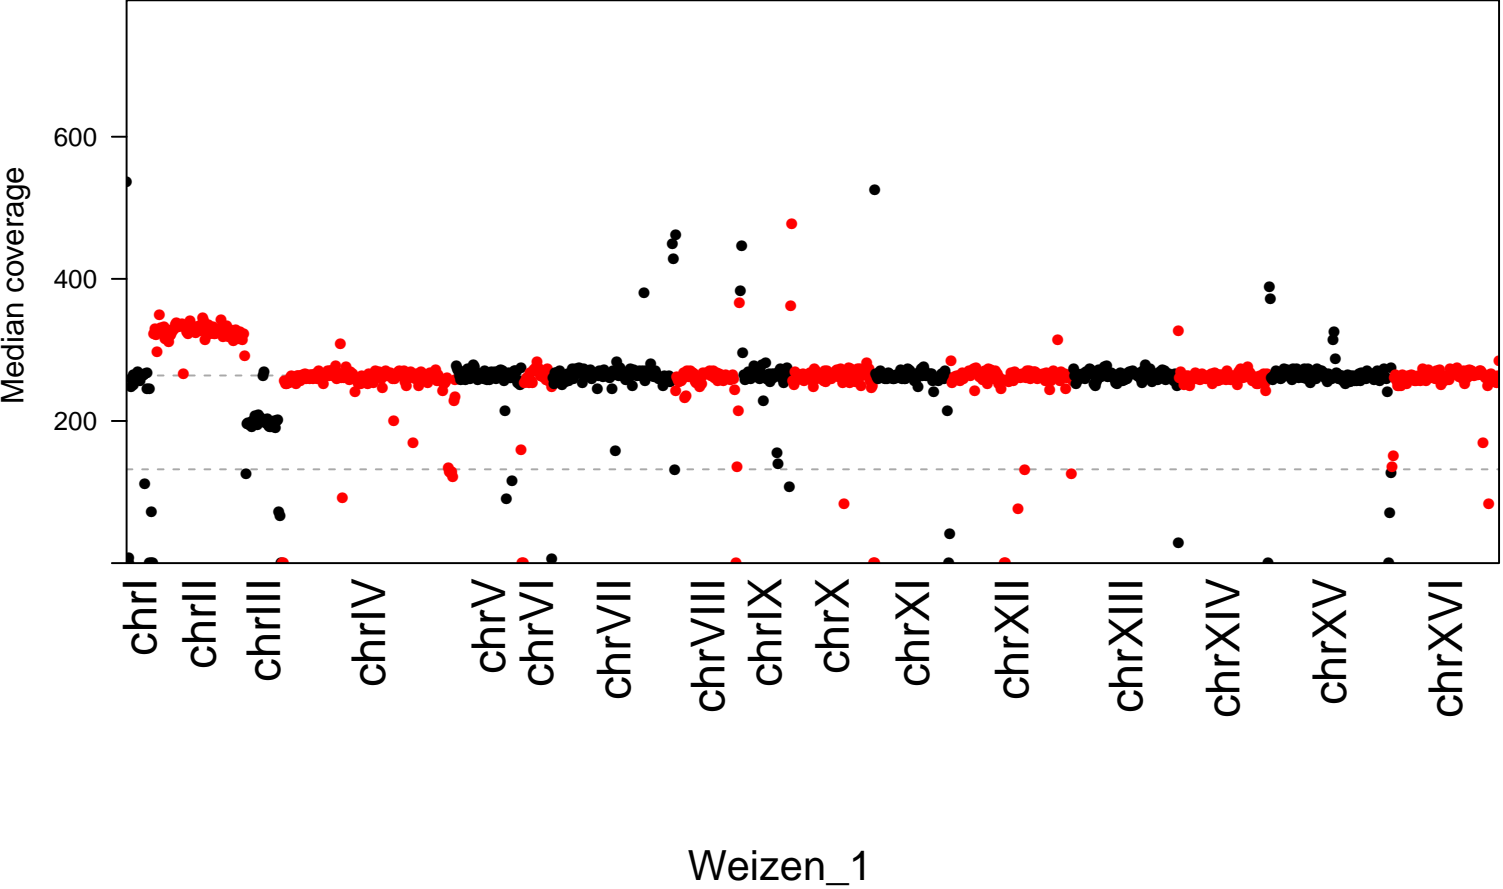

# Supplementary Figure S2

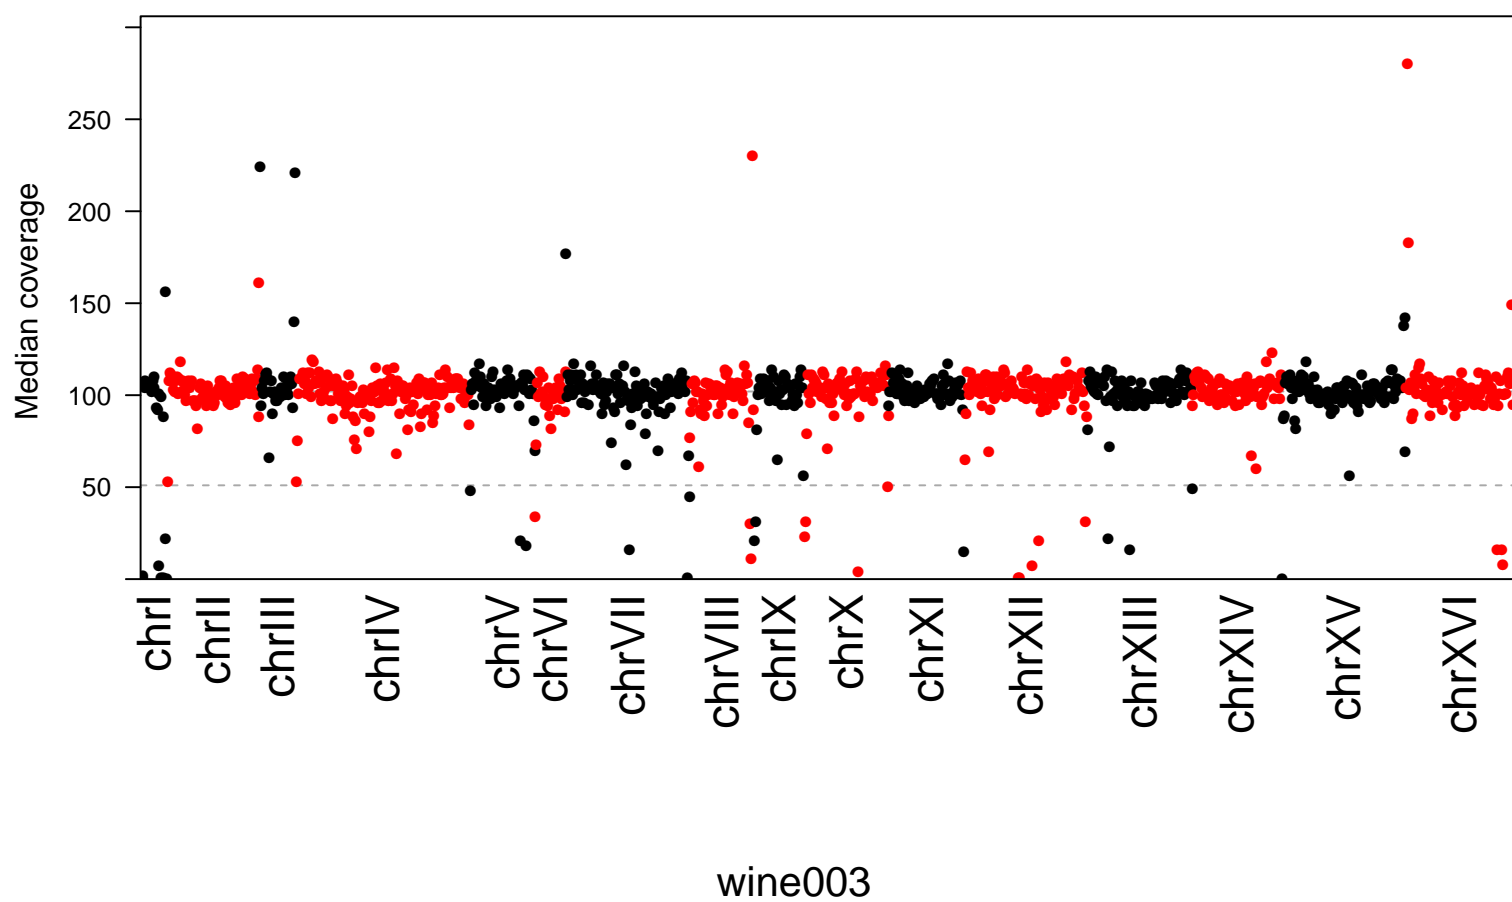

# Supplementary Figure S2

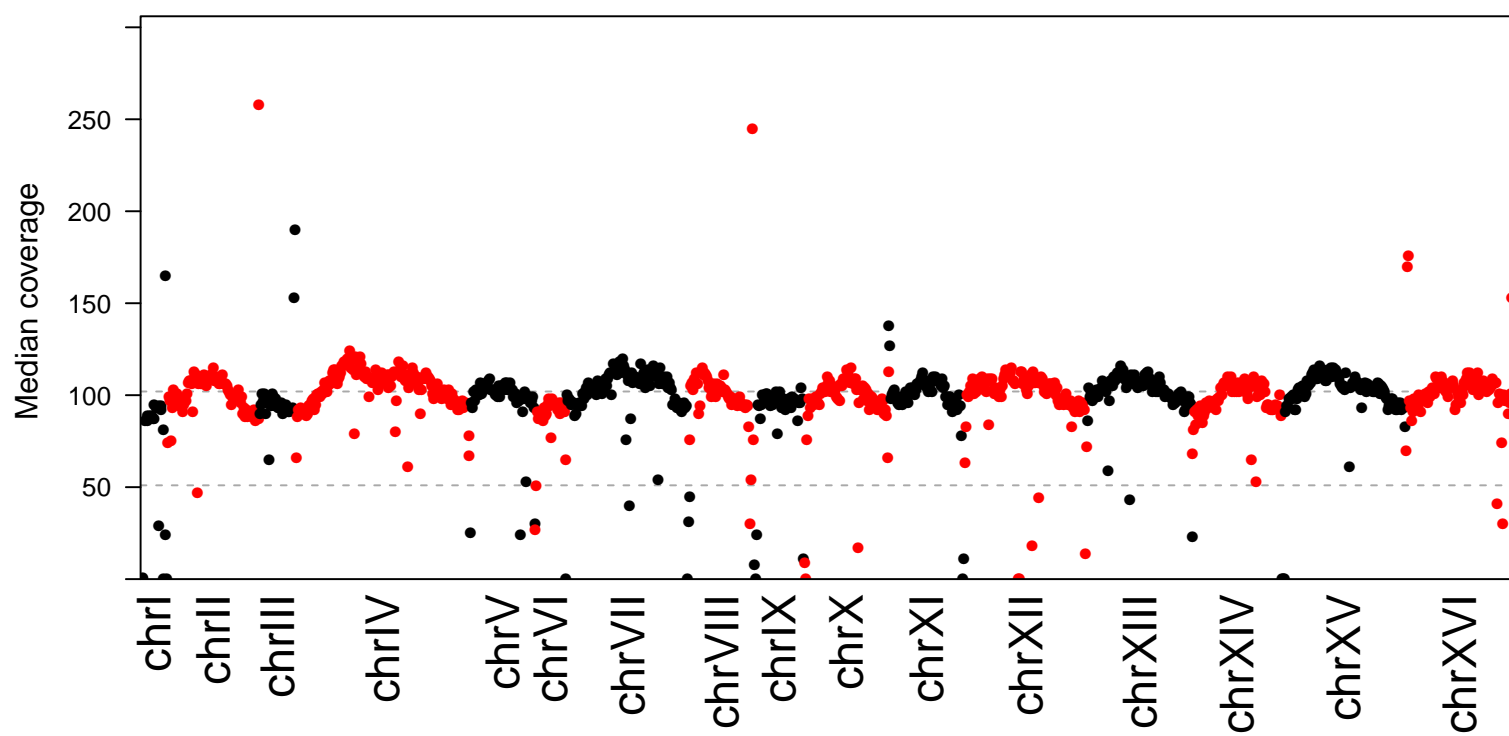

wine005

# Supplementary Figure S3

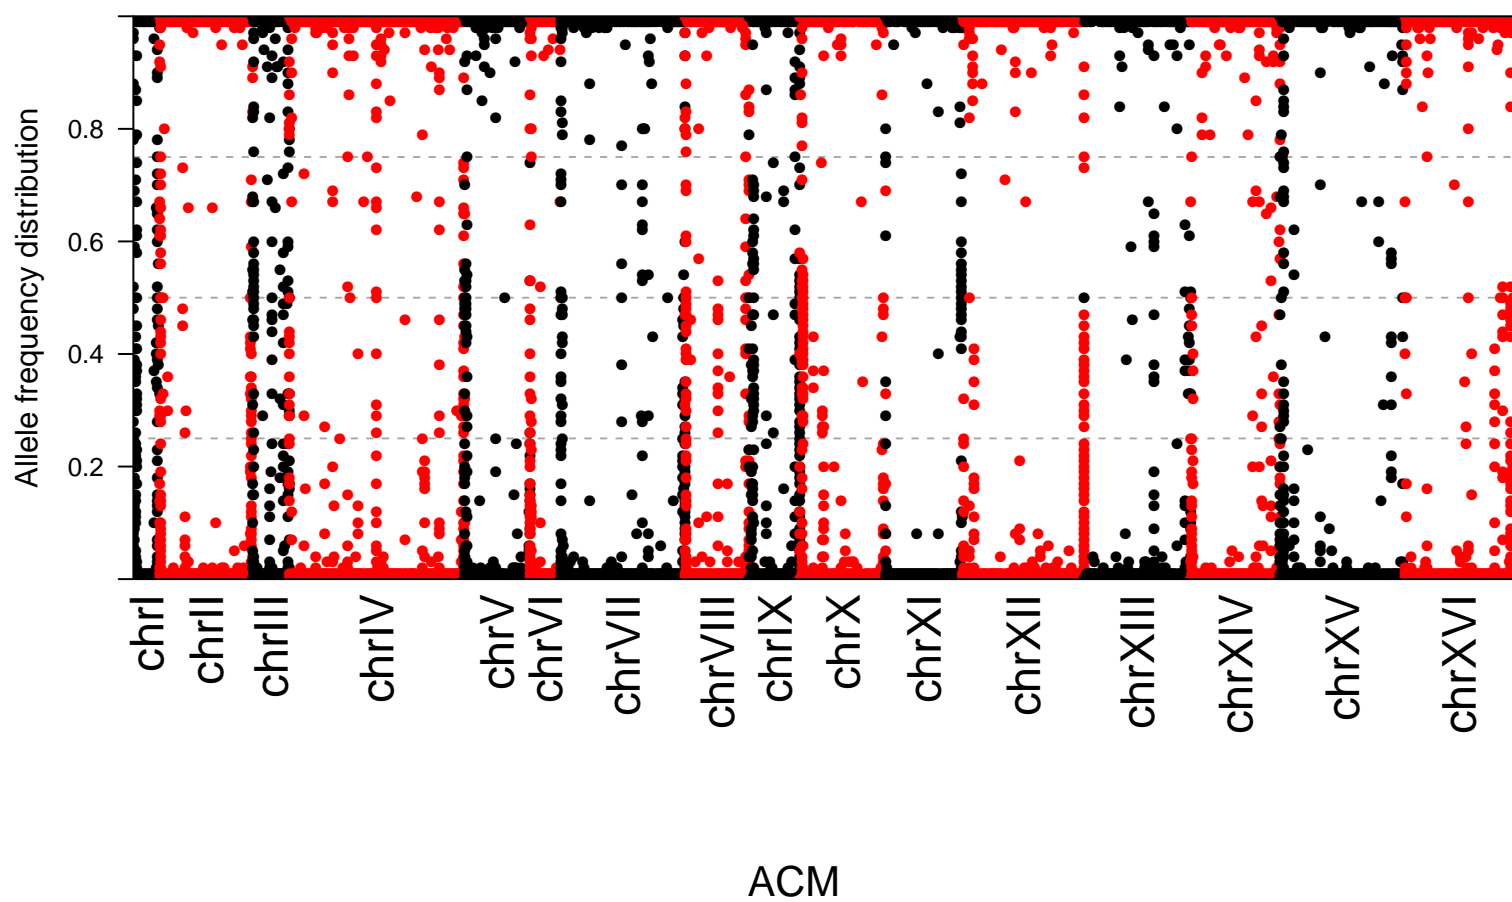

# Supplementary Figure S3

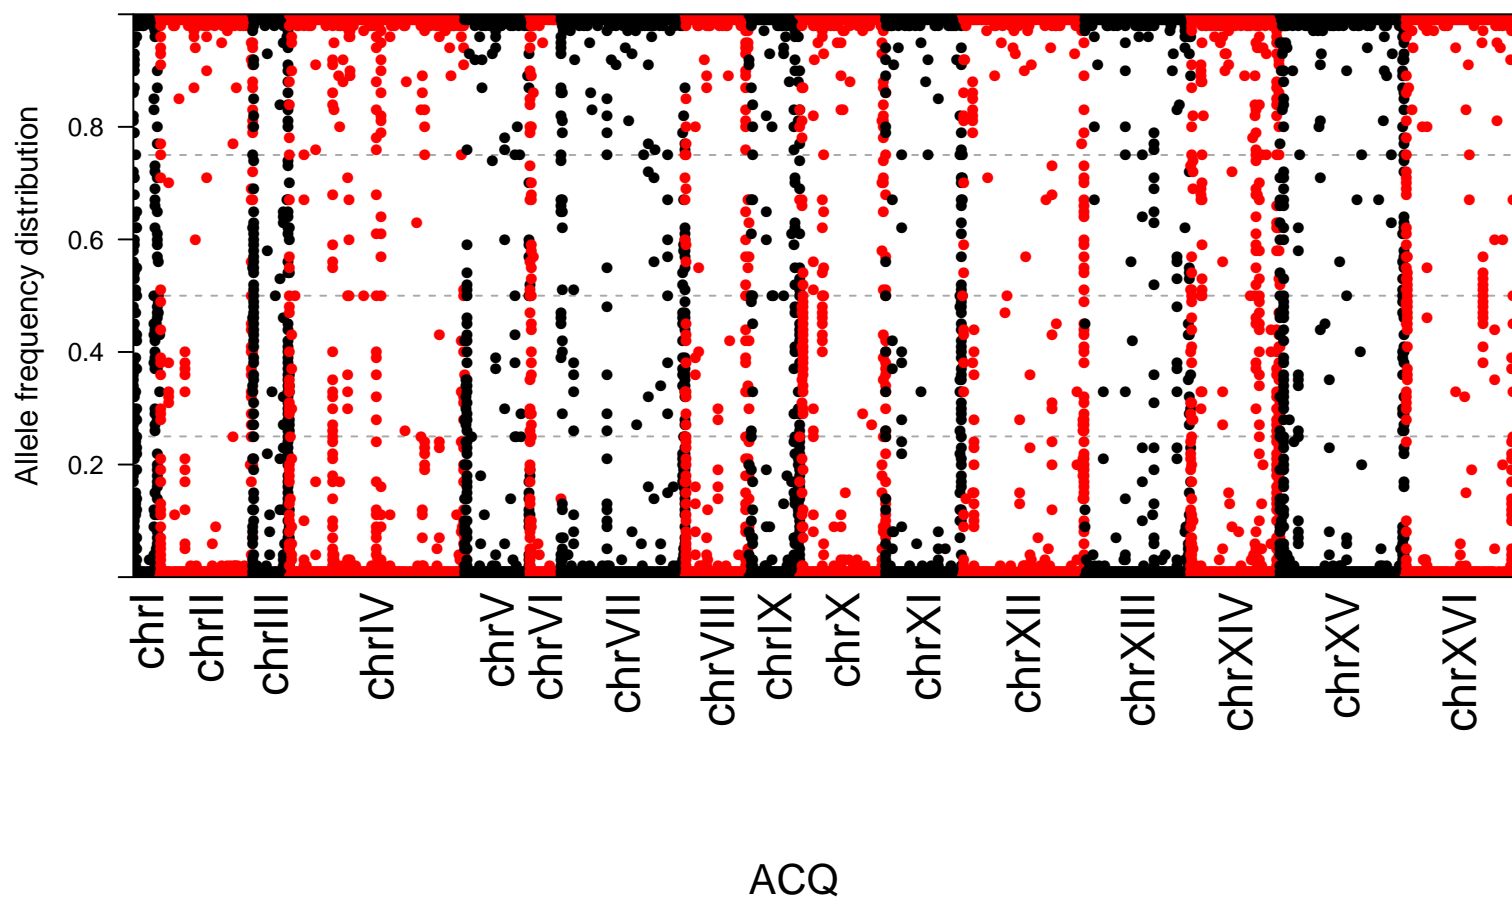



# Supplementary Figure S3

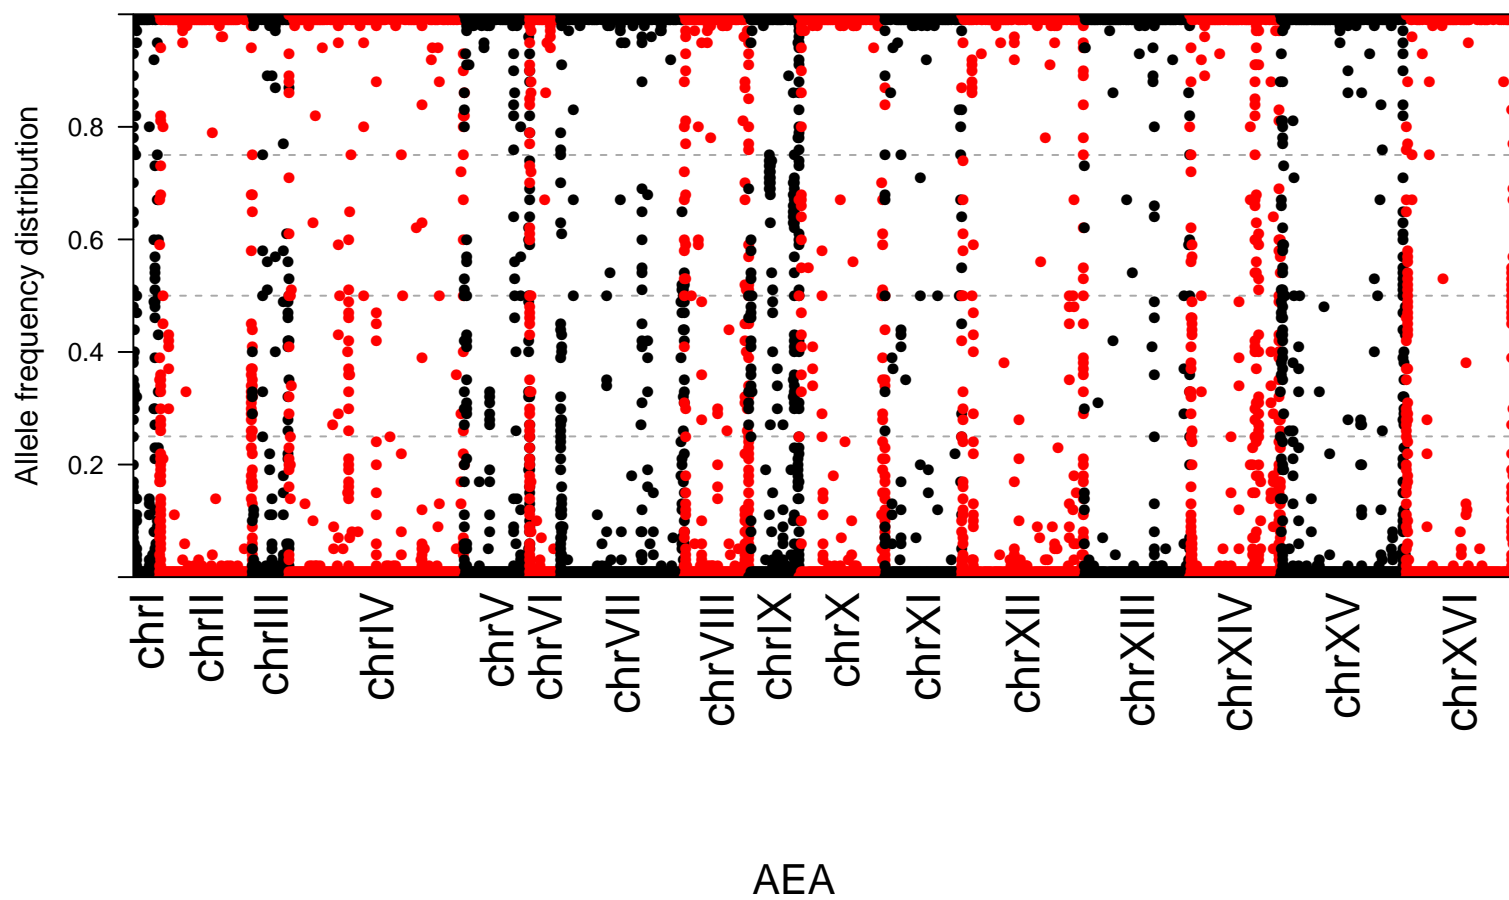

Supplementary Figure S3

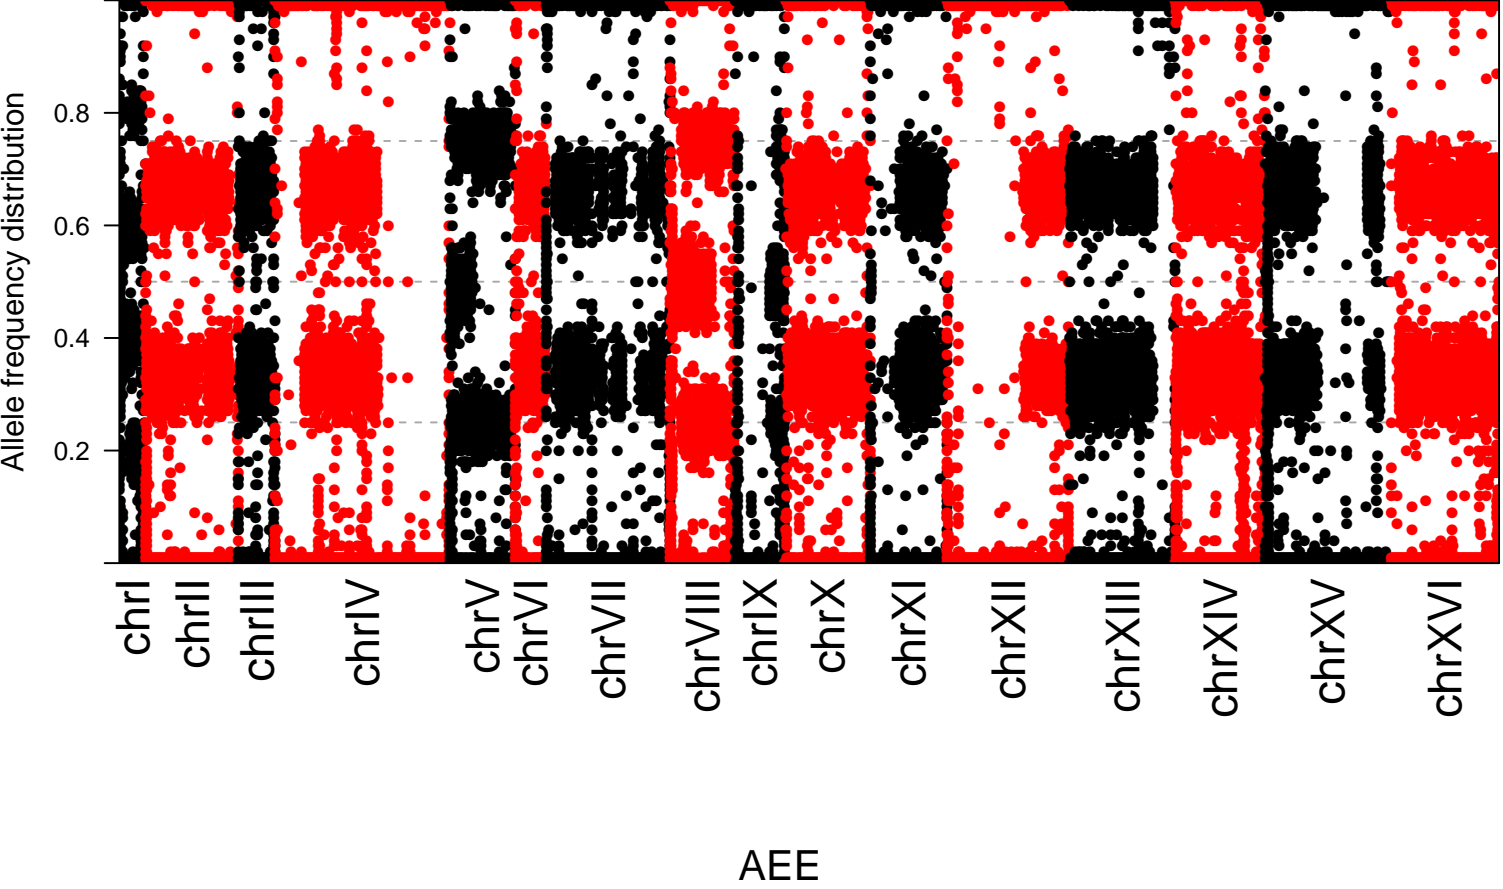

# Supplementary Figure S3

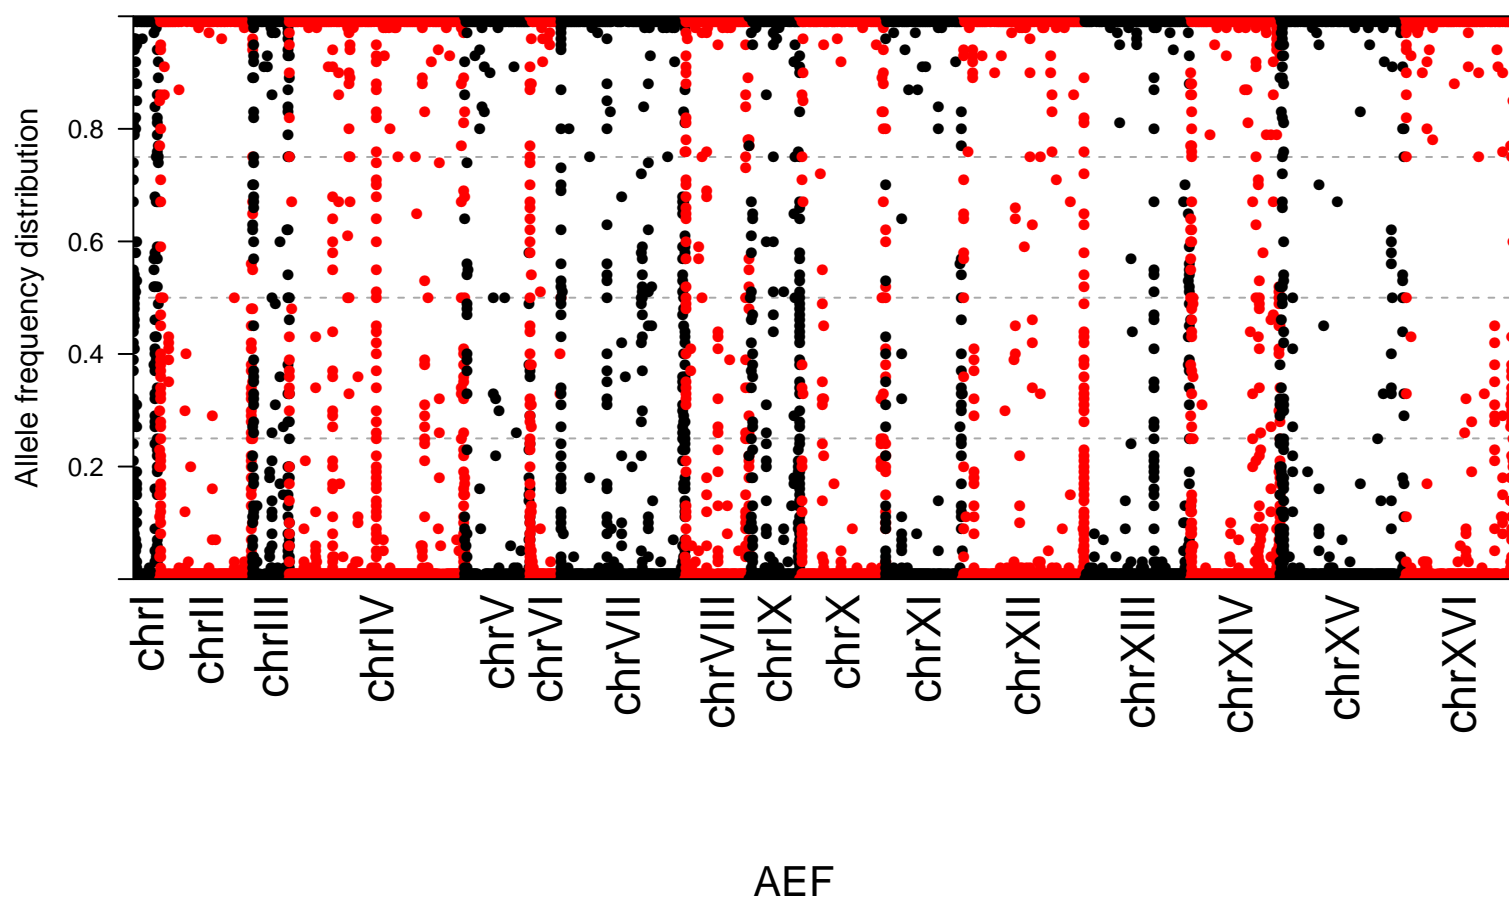

# Supplementary Figure S3

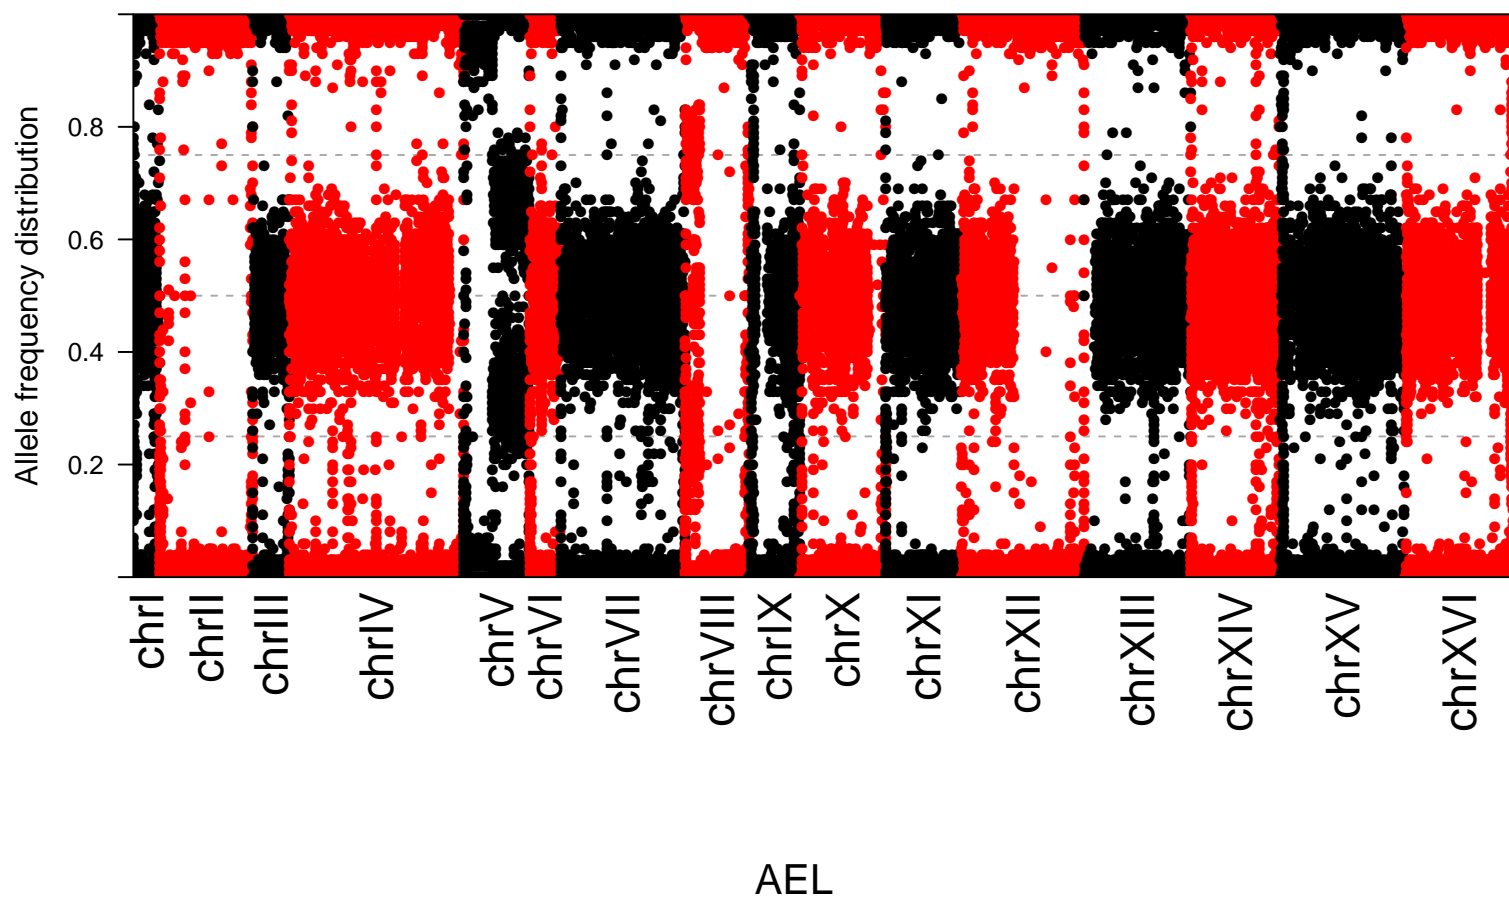

# Supplementary Figure S3

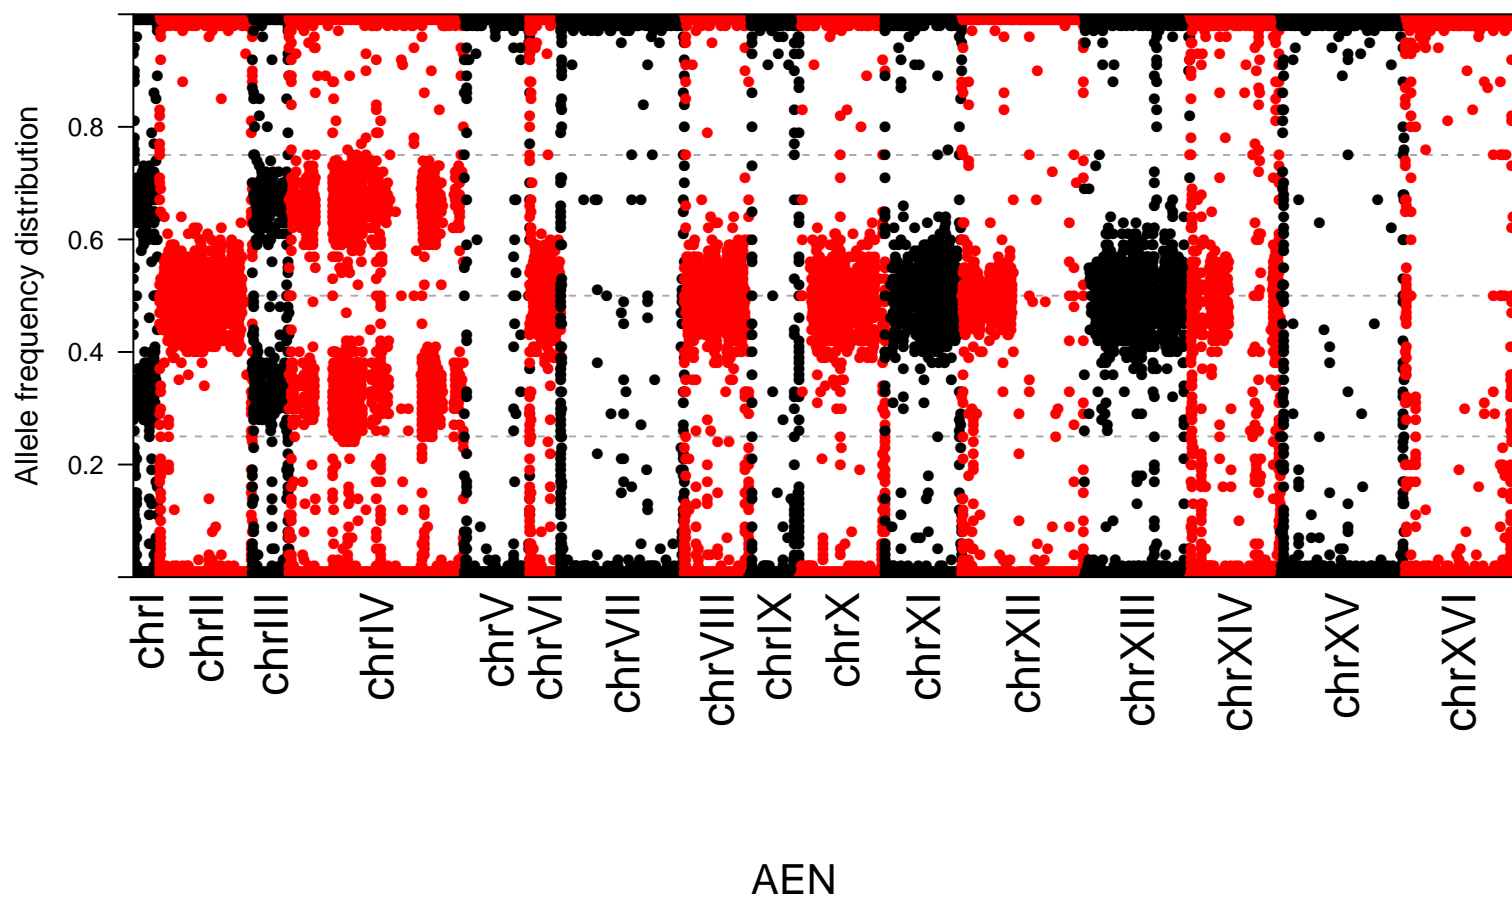

Supplementary Figure S3

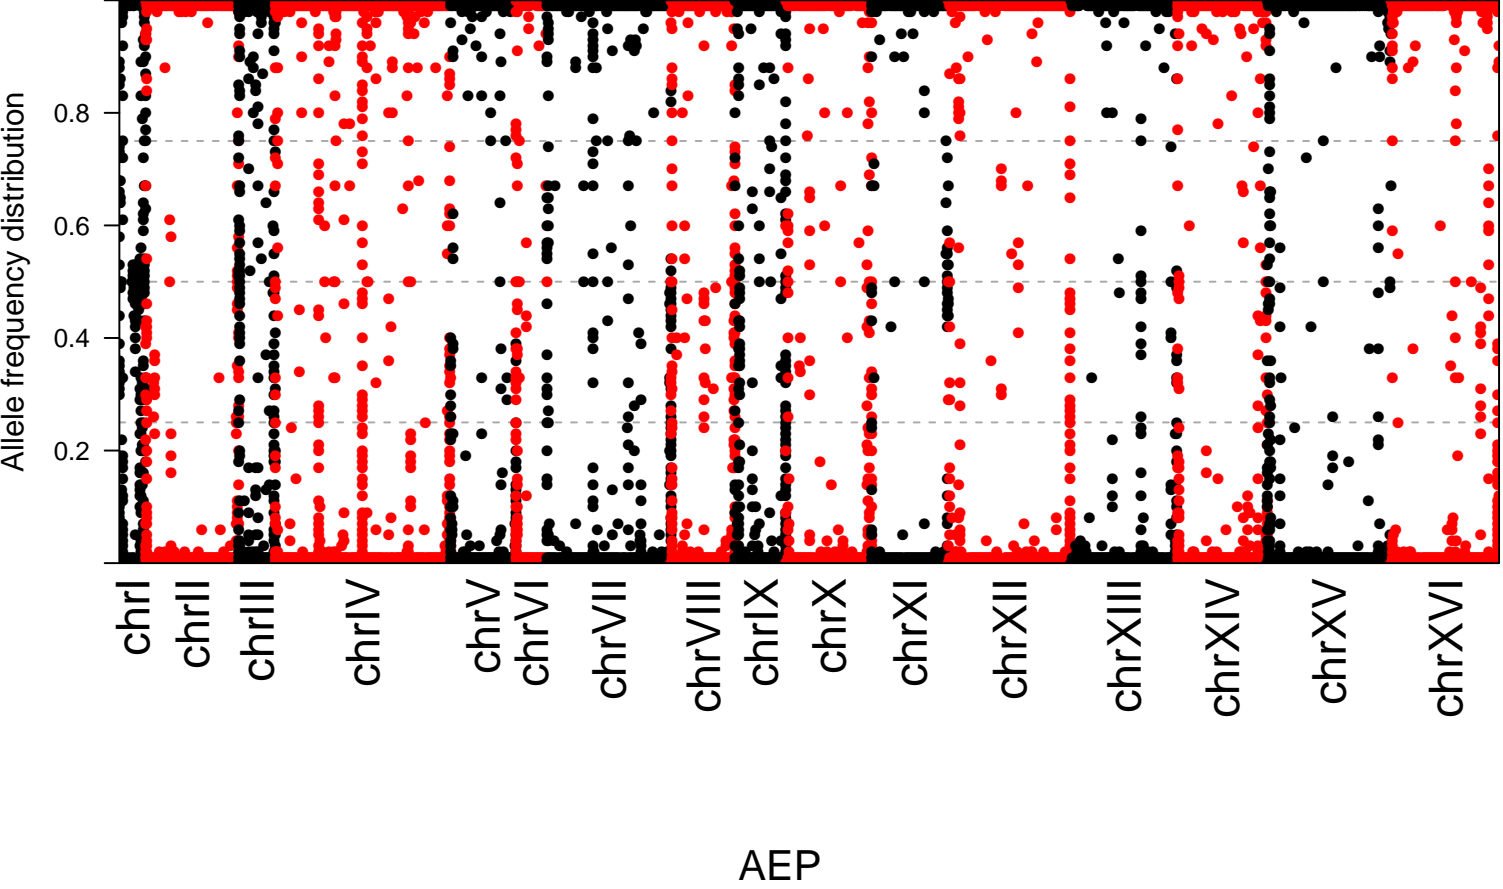

# Supplementary Figure S3

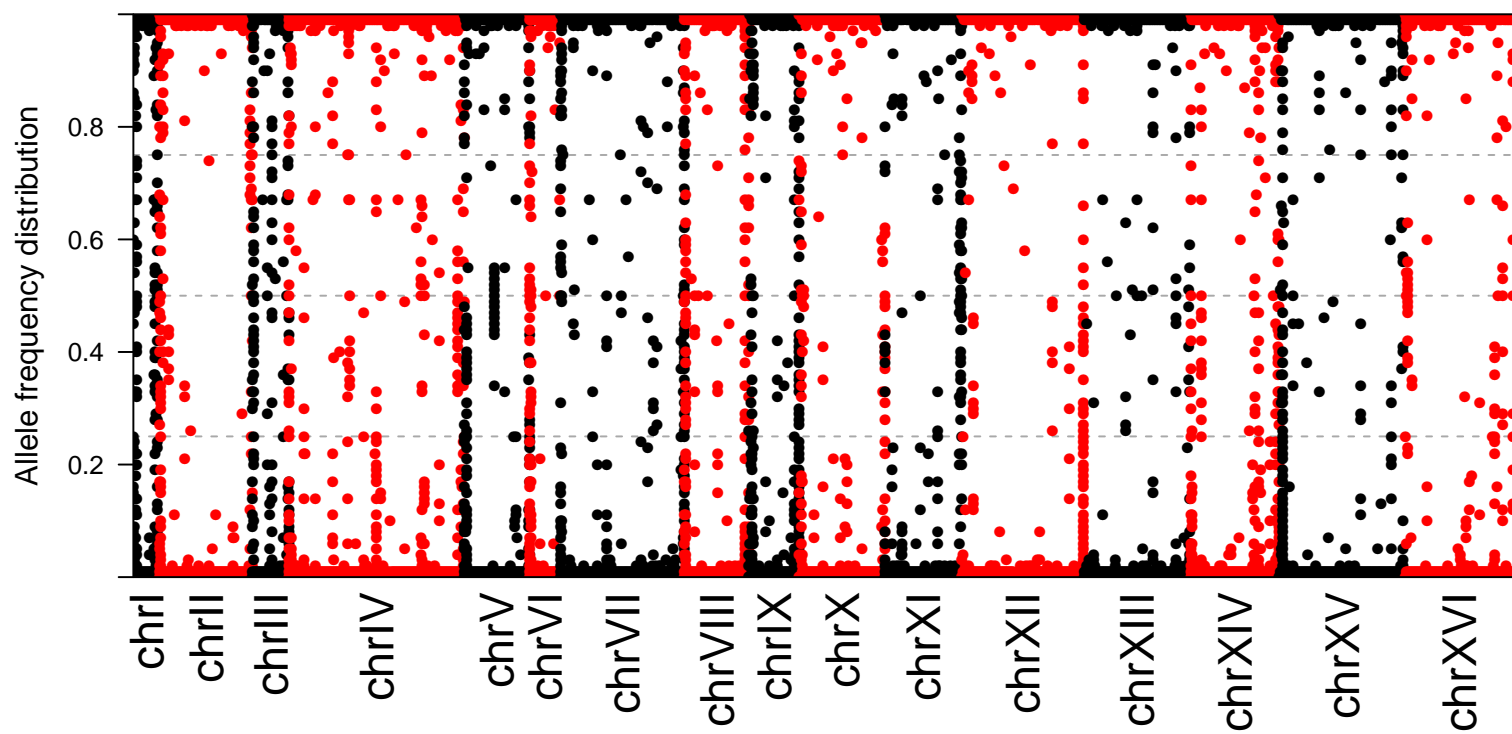

AFK

# Supplementary Figure S3

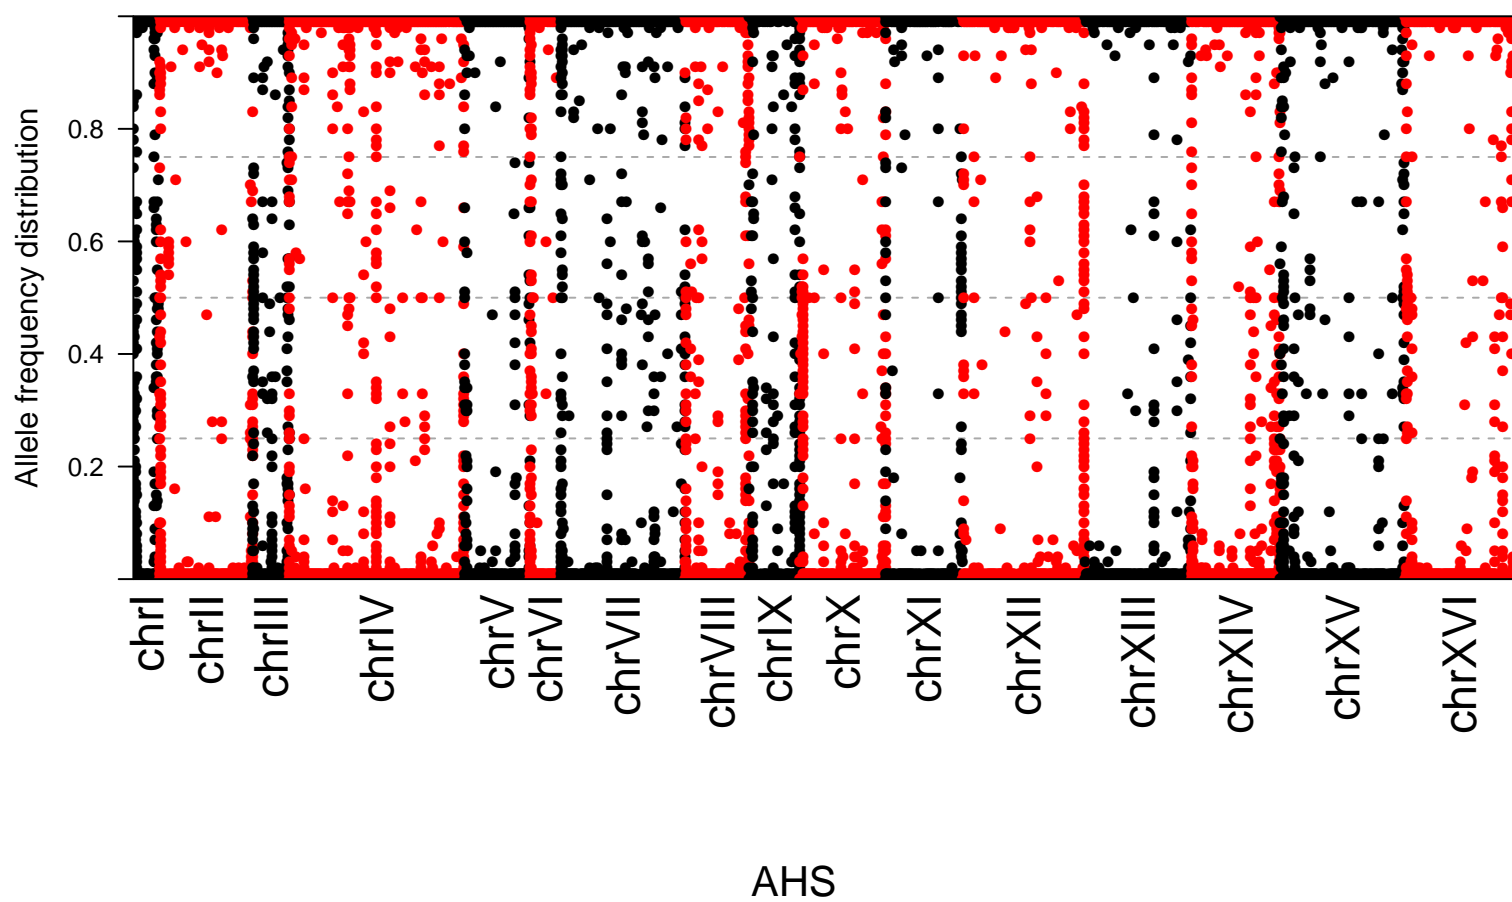



# Supplementary Figure S3

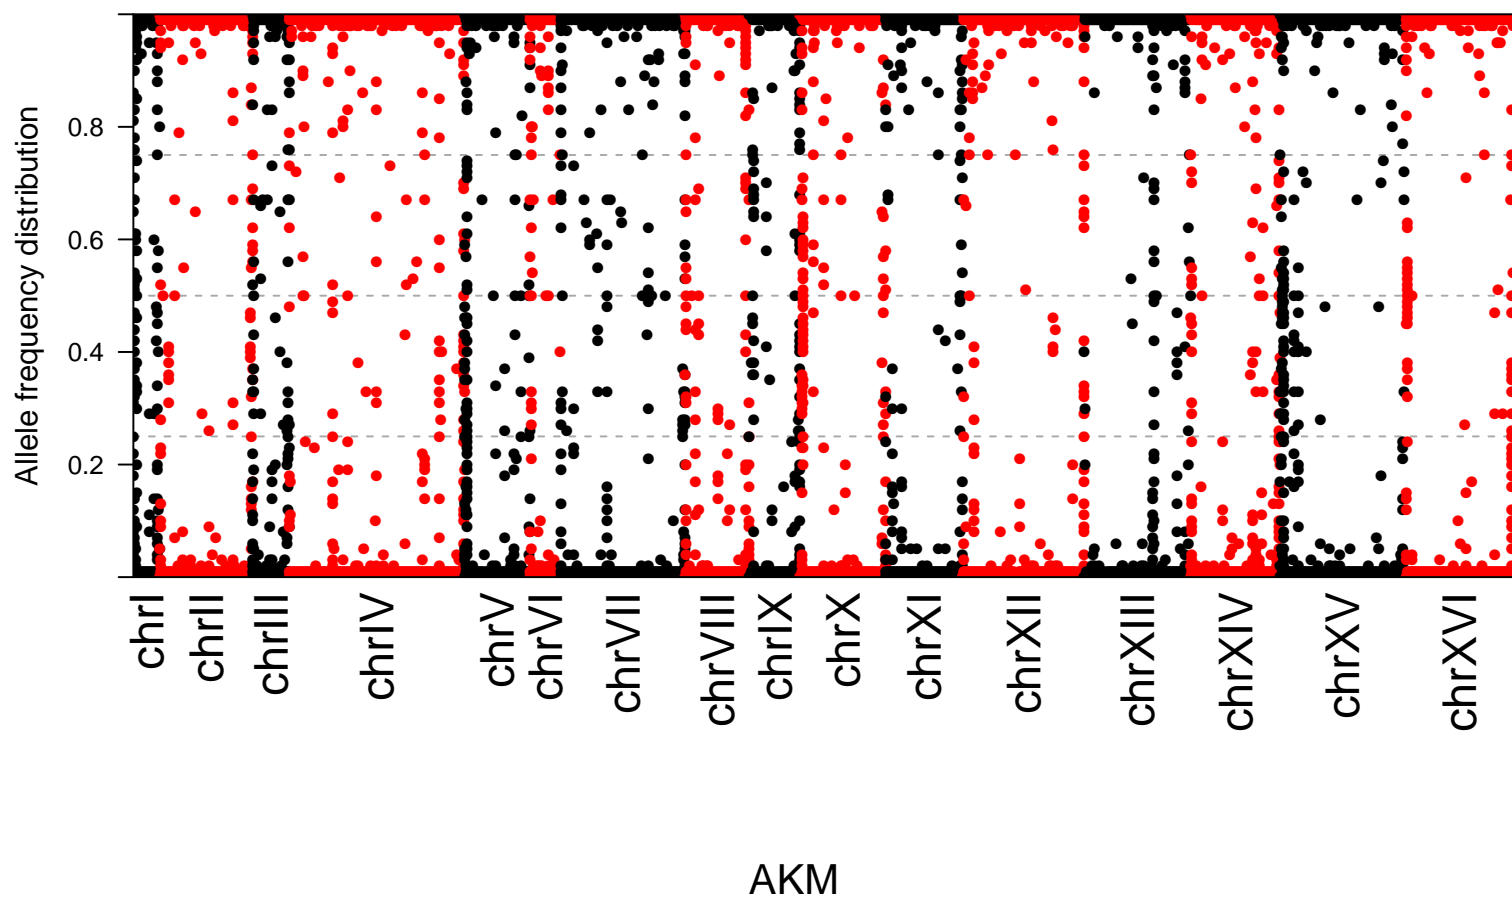

Supplementary Figure S3

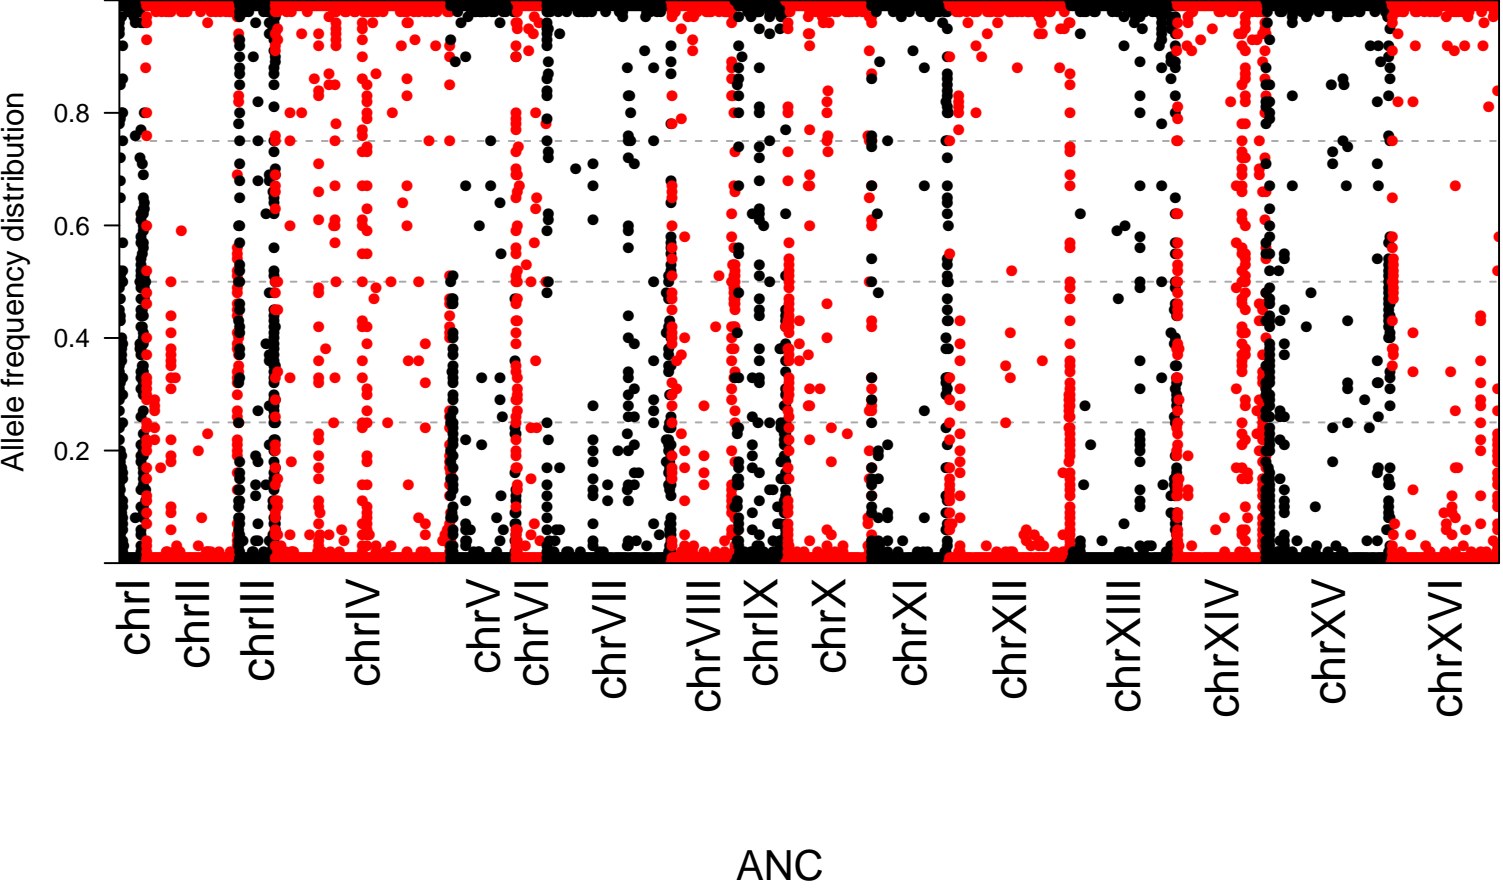

# Supplementary Figure S3

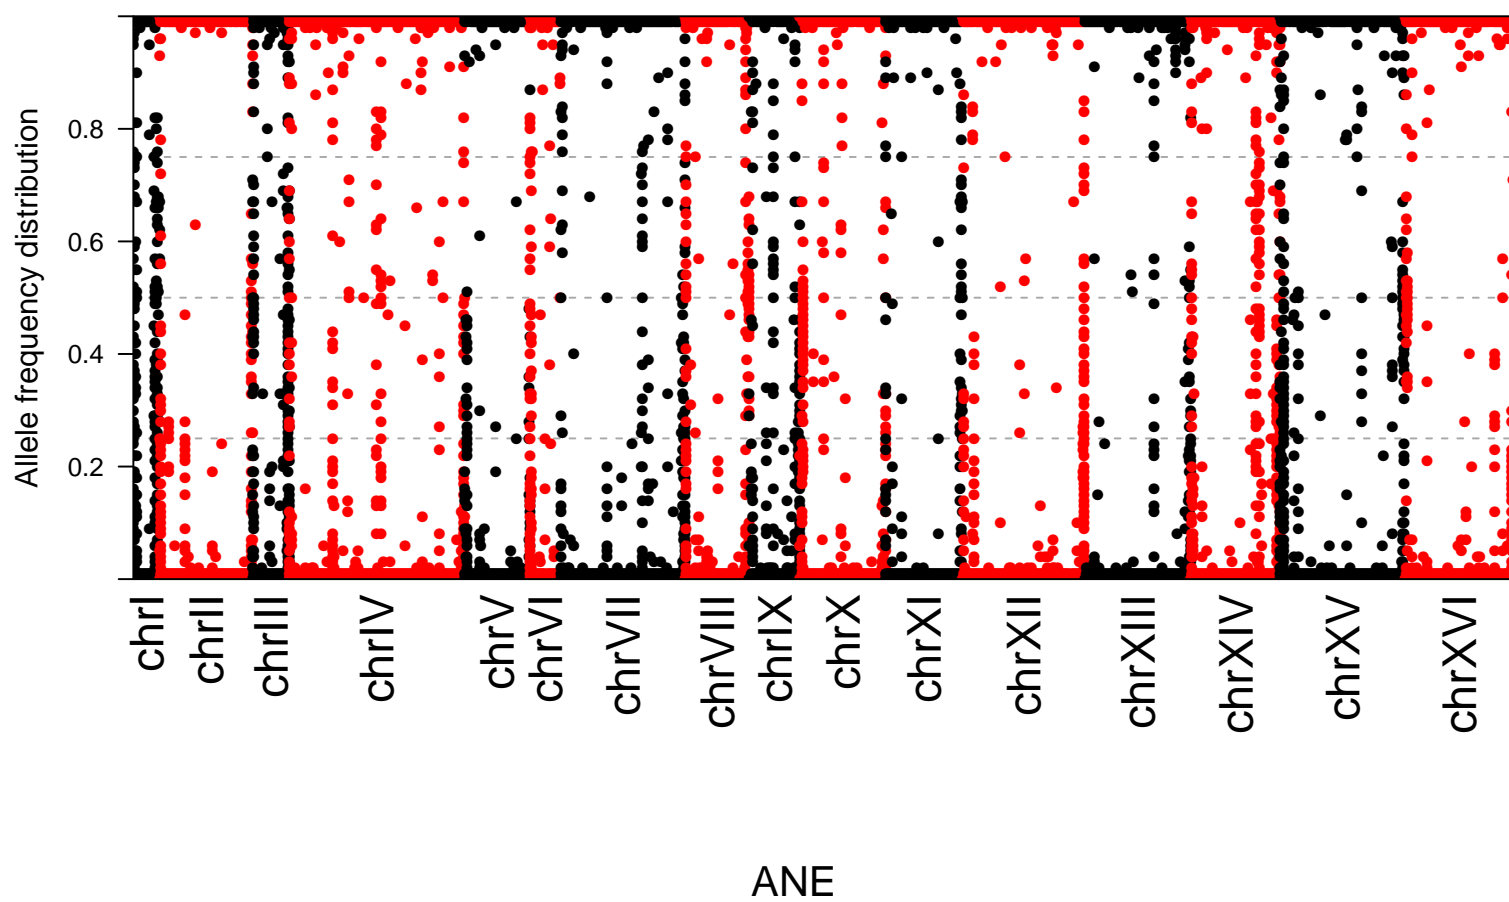

Supplementary Figure S3

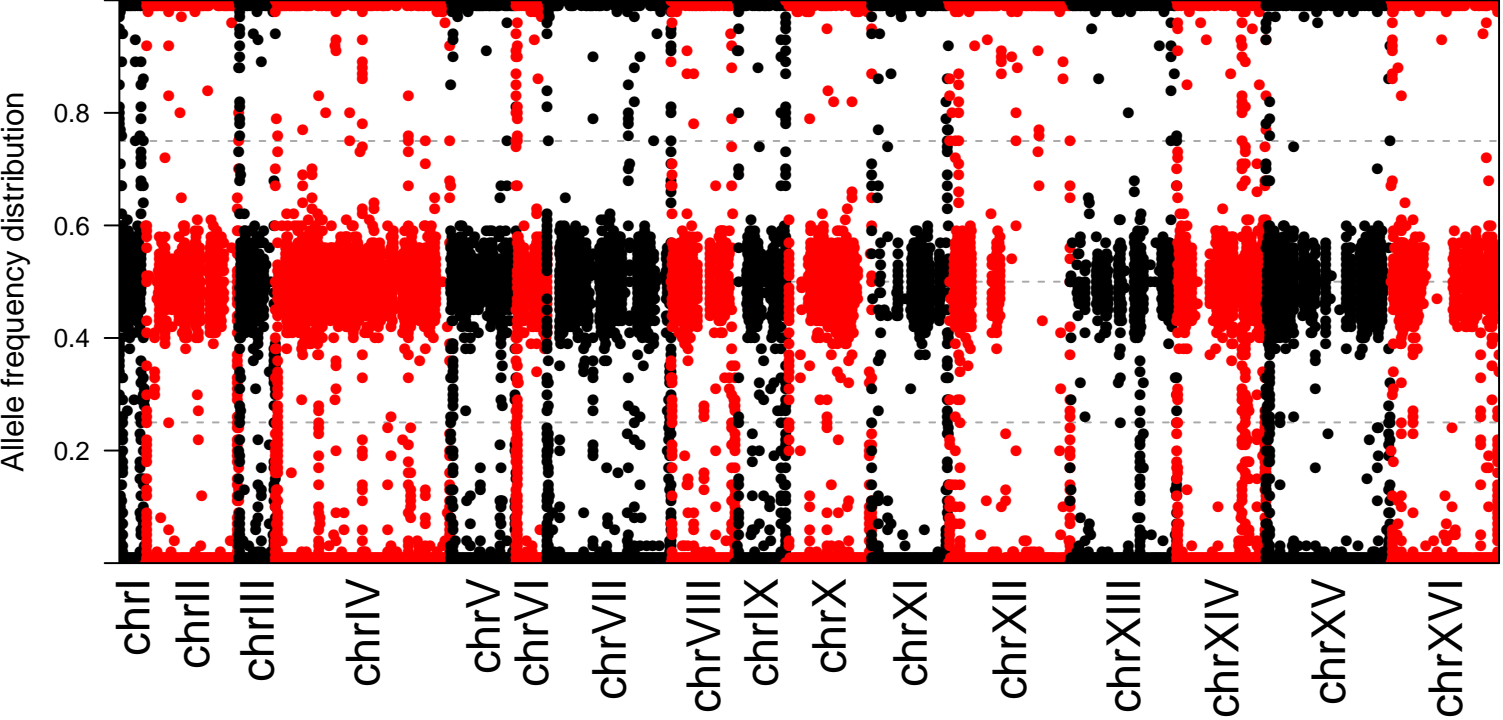

ANN

# Supplementary Figure S3

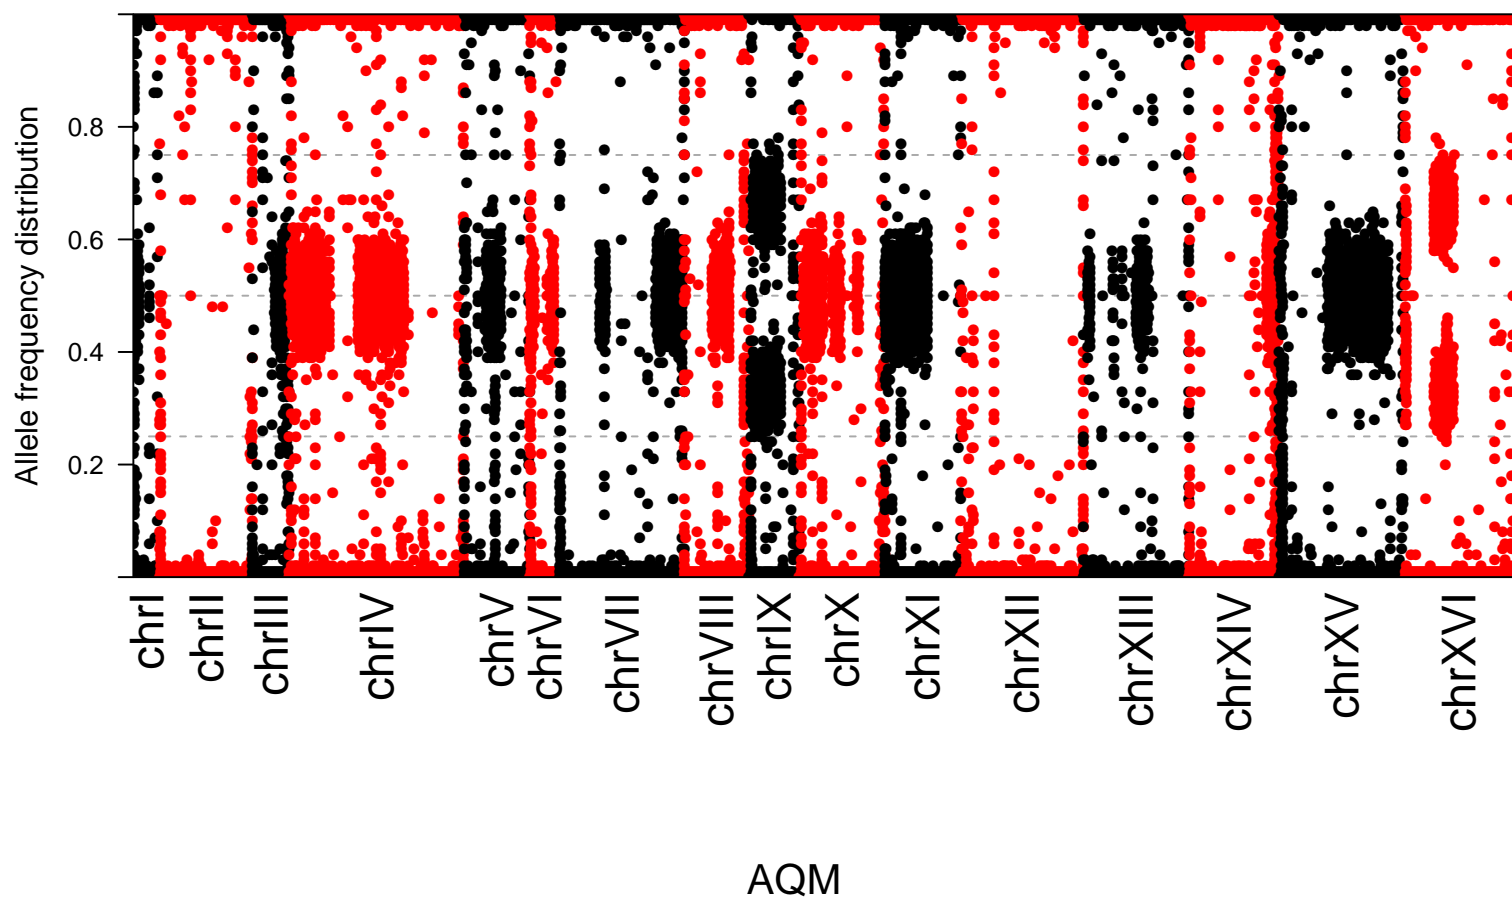

Supplementary Figure S3

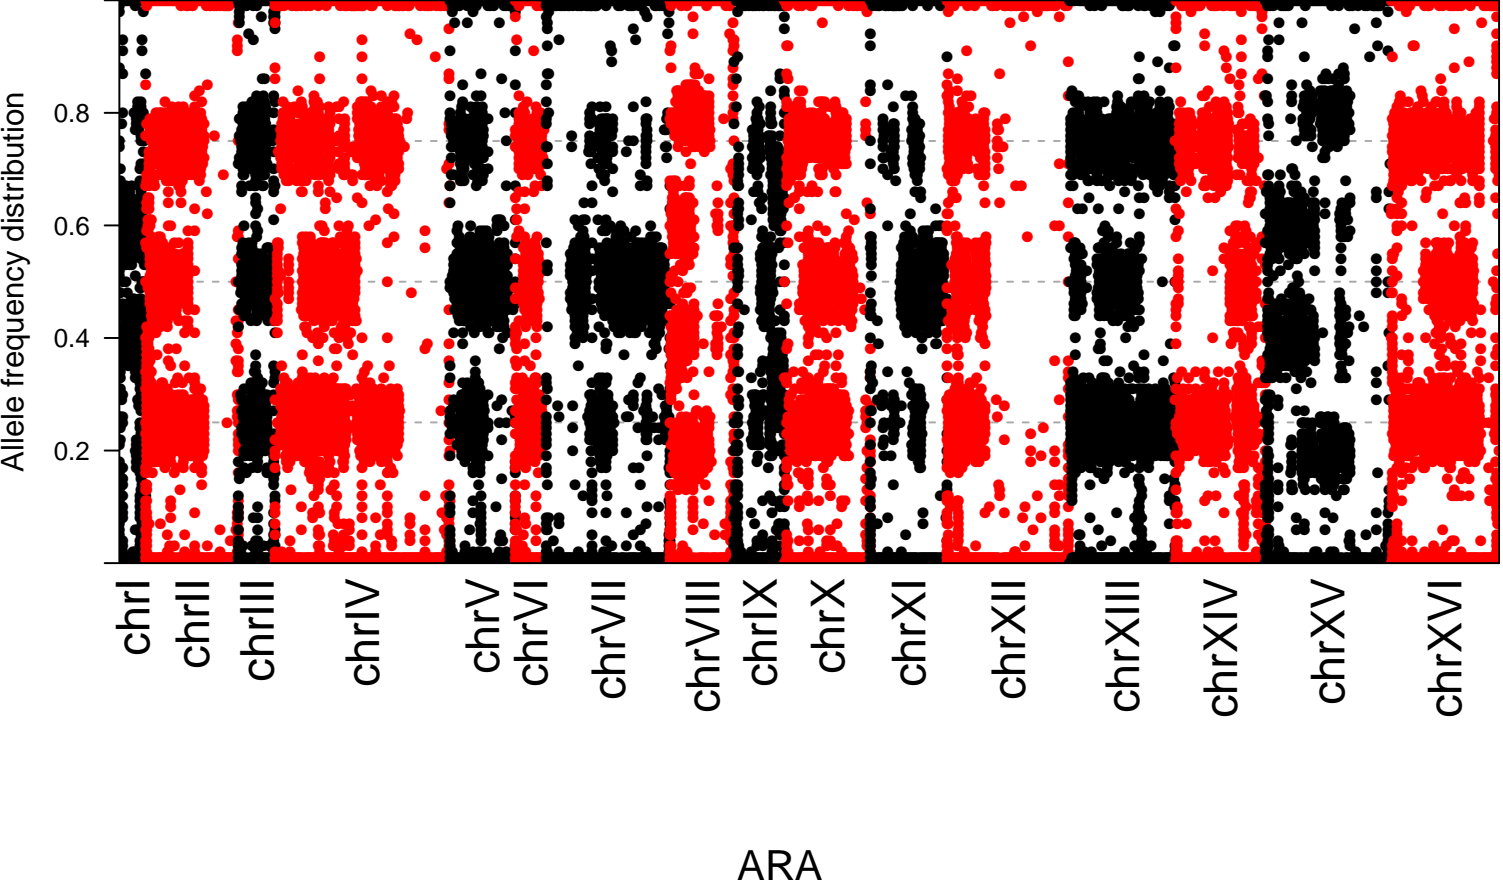

# Supplementary Figure S3

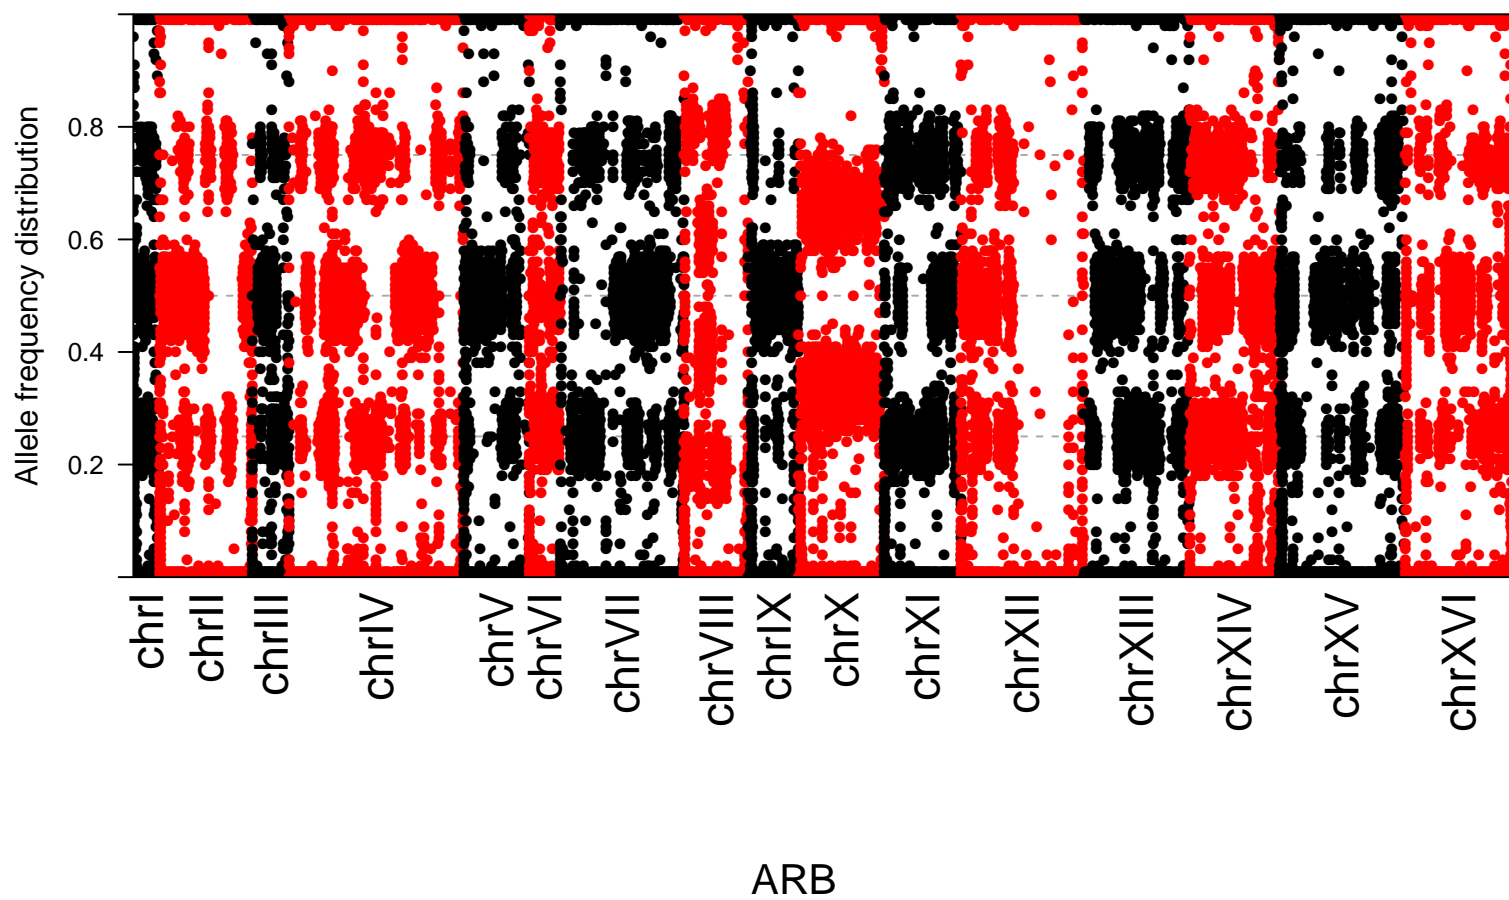

Supplementary Figure S3

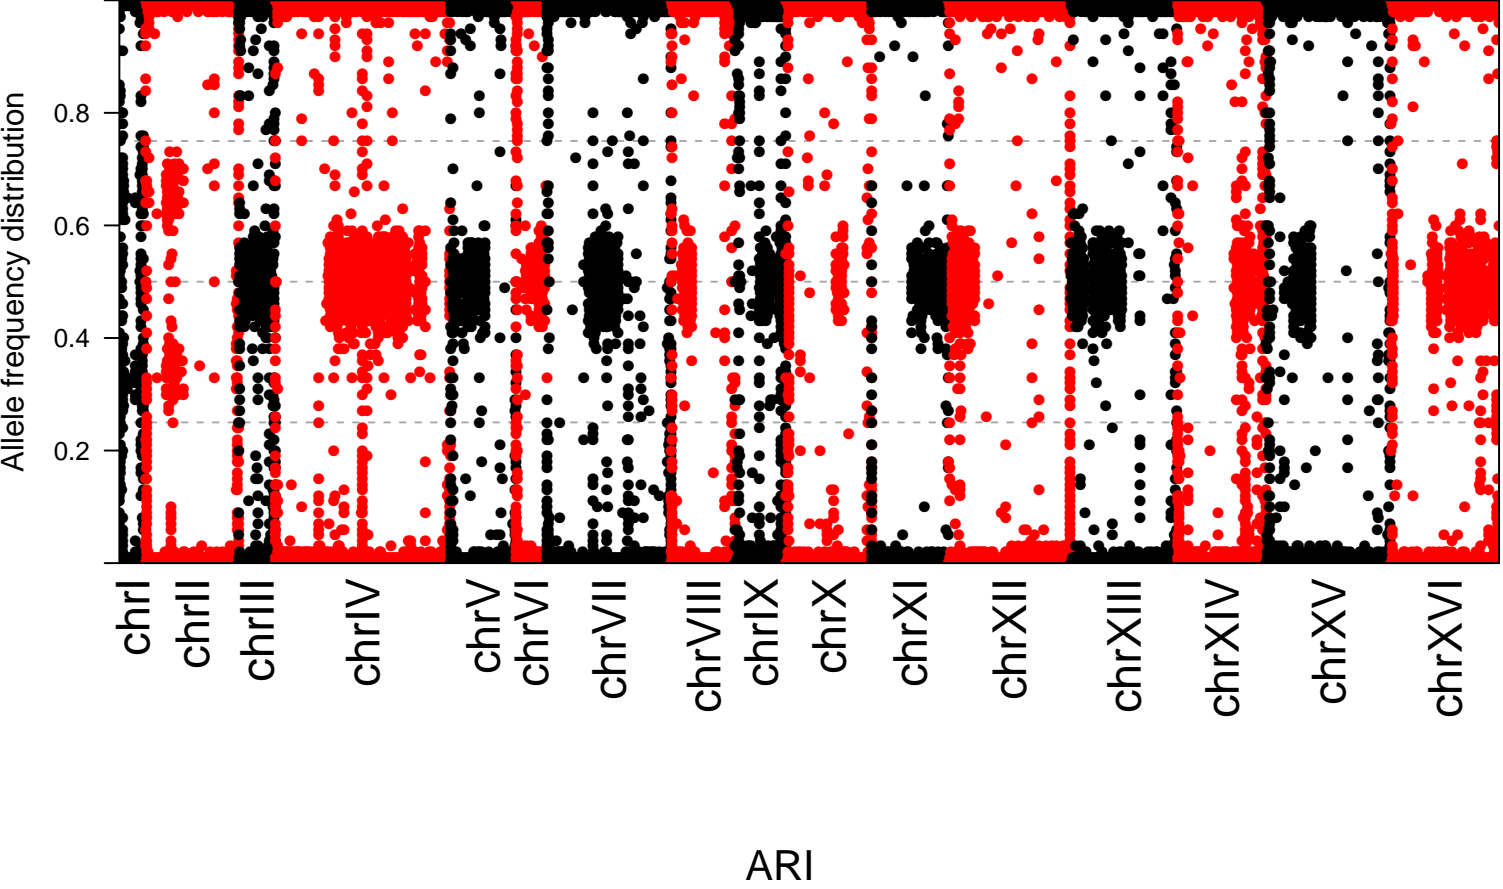



Supplementary Figure S3

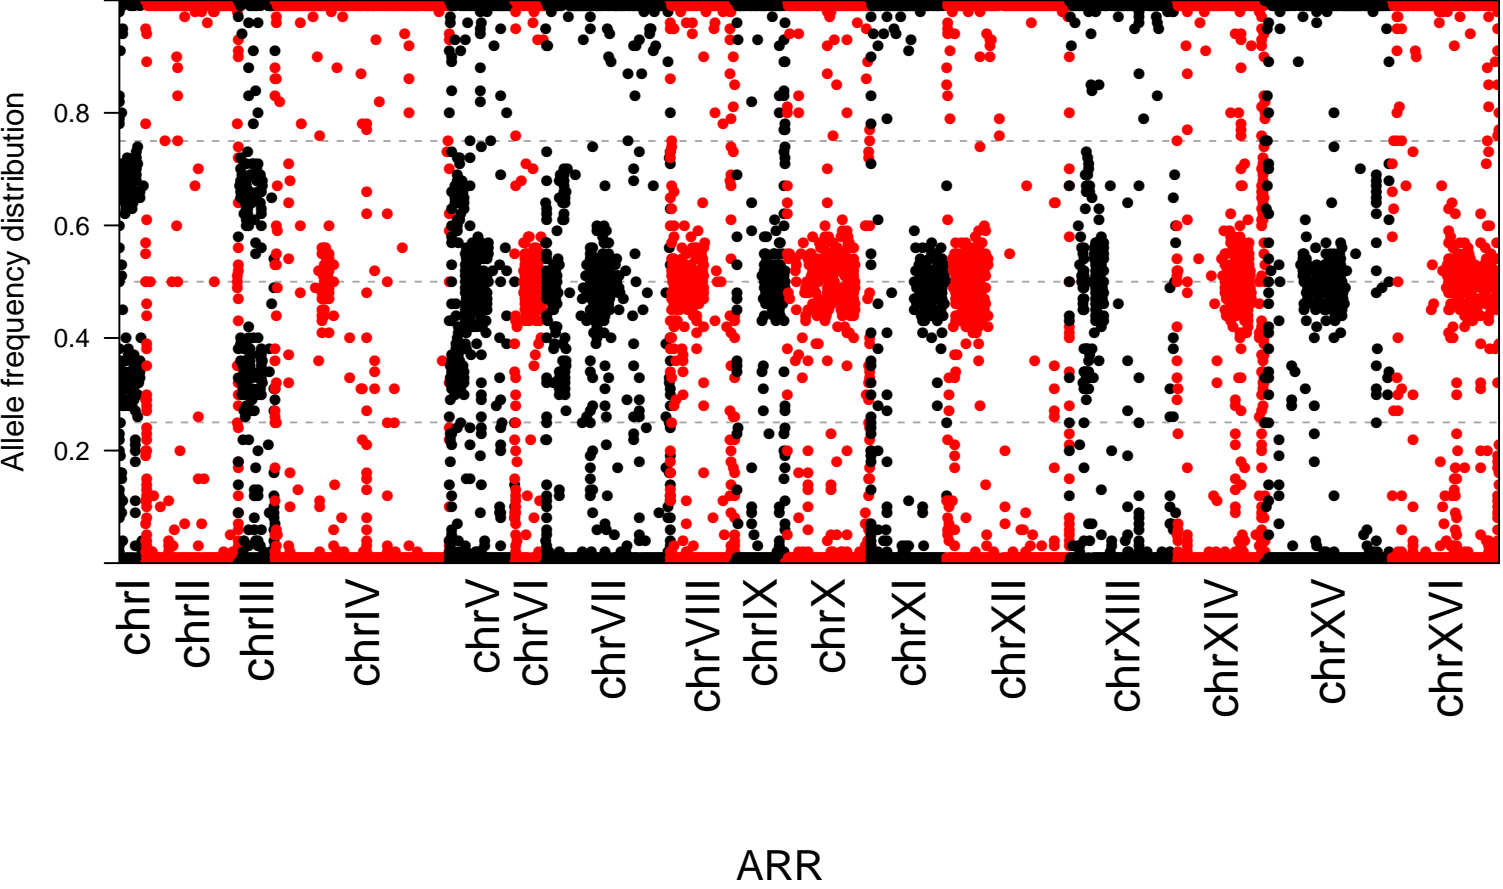

# Supplementary Figure S3

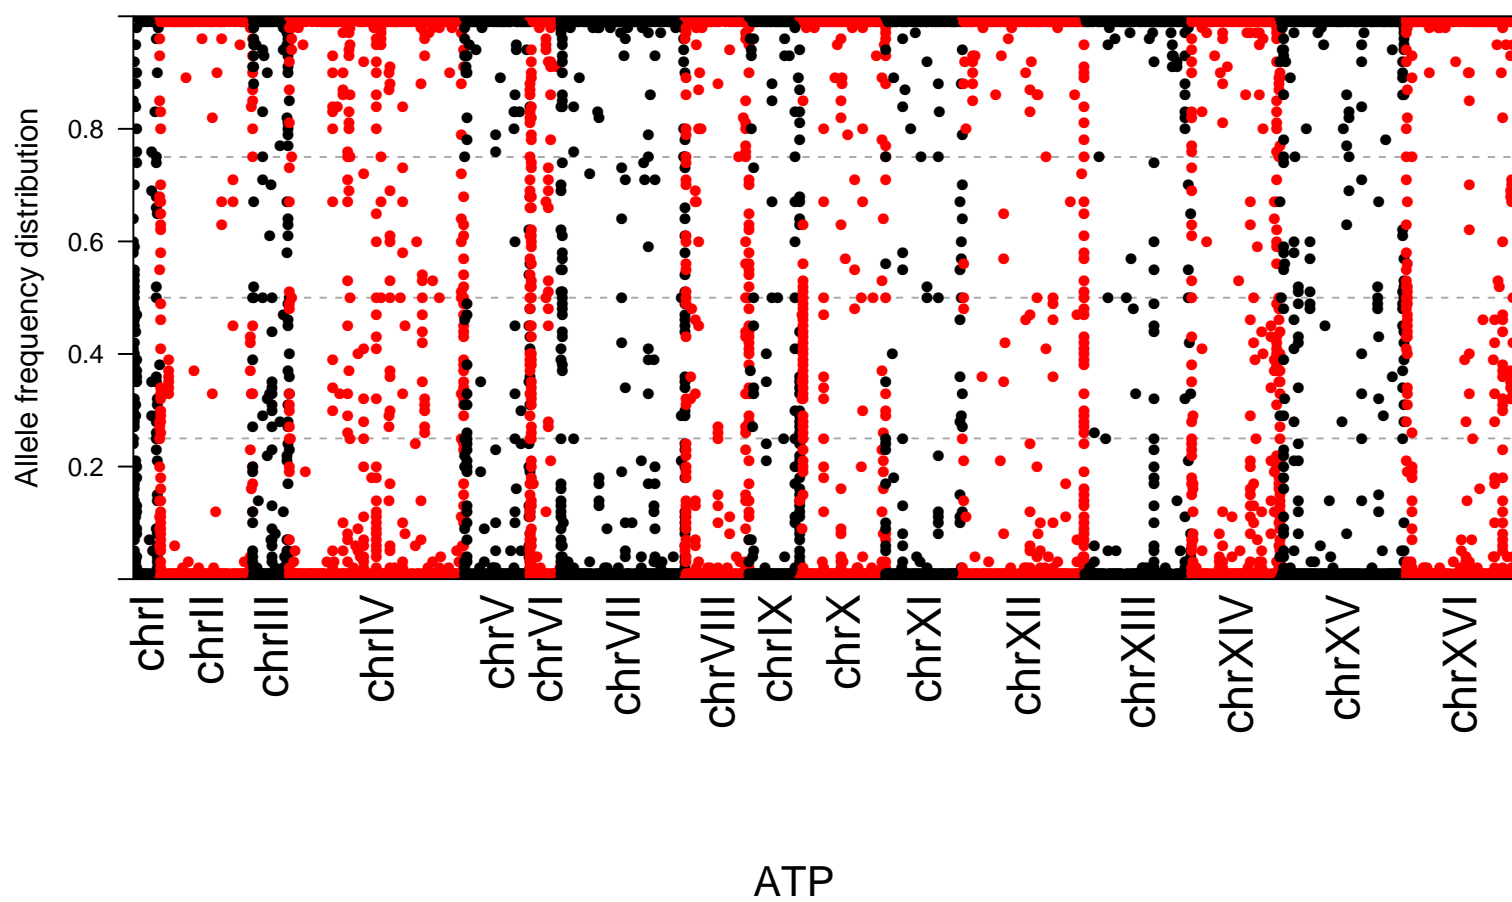

Supplementary Figure S3

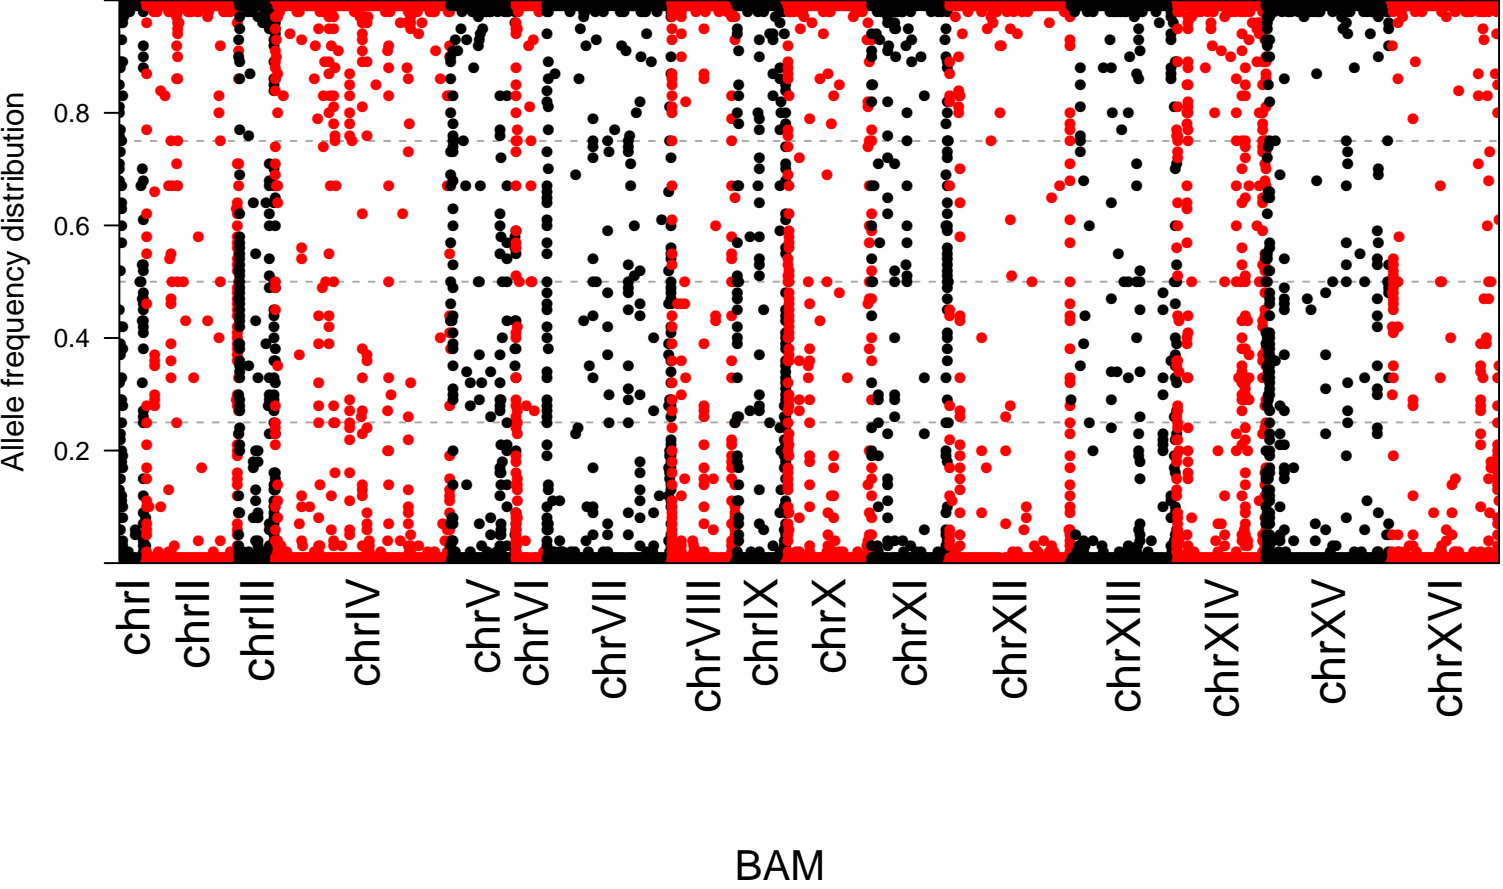

# Supplementary Figure S3

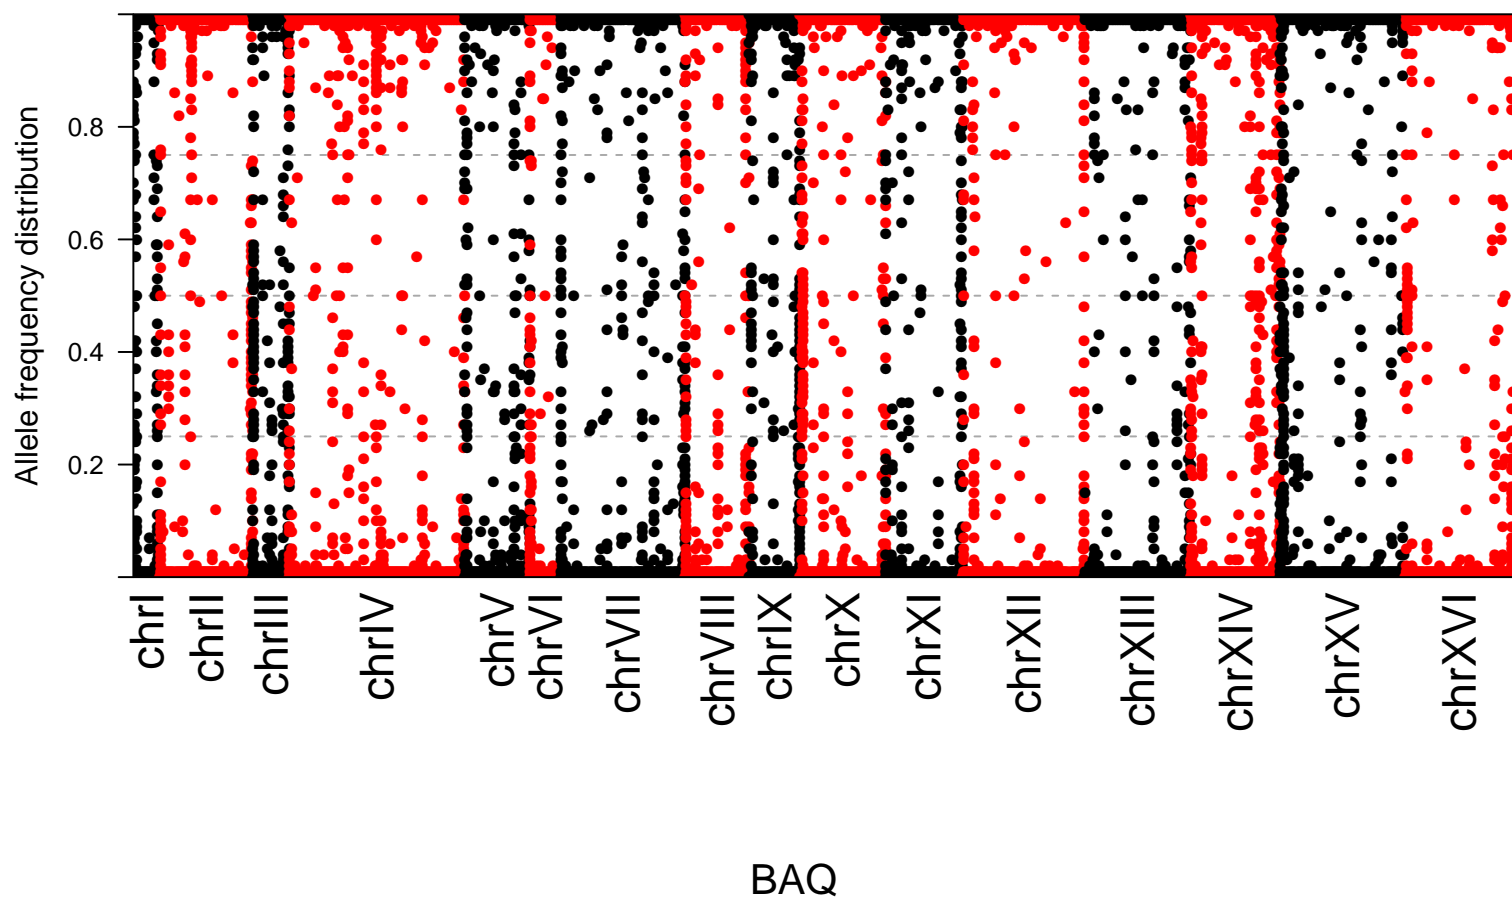

Supplementary Figure S3

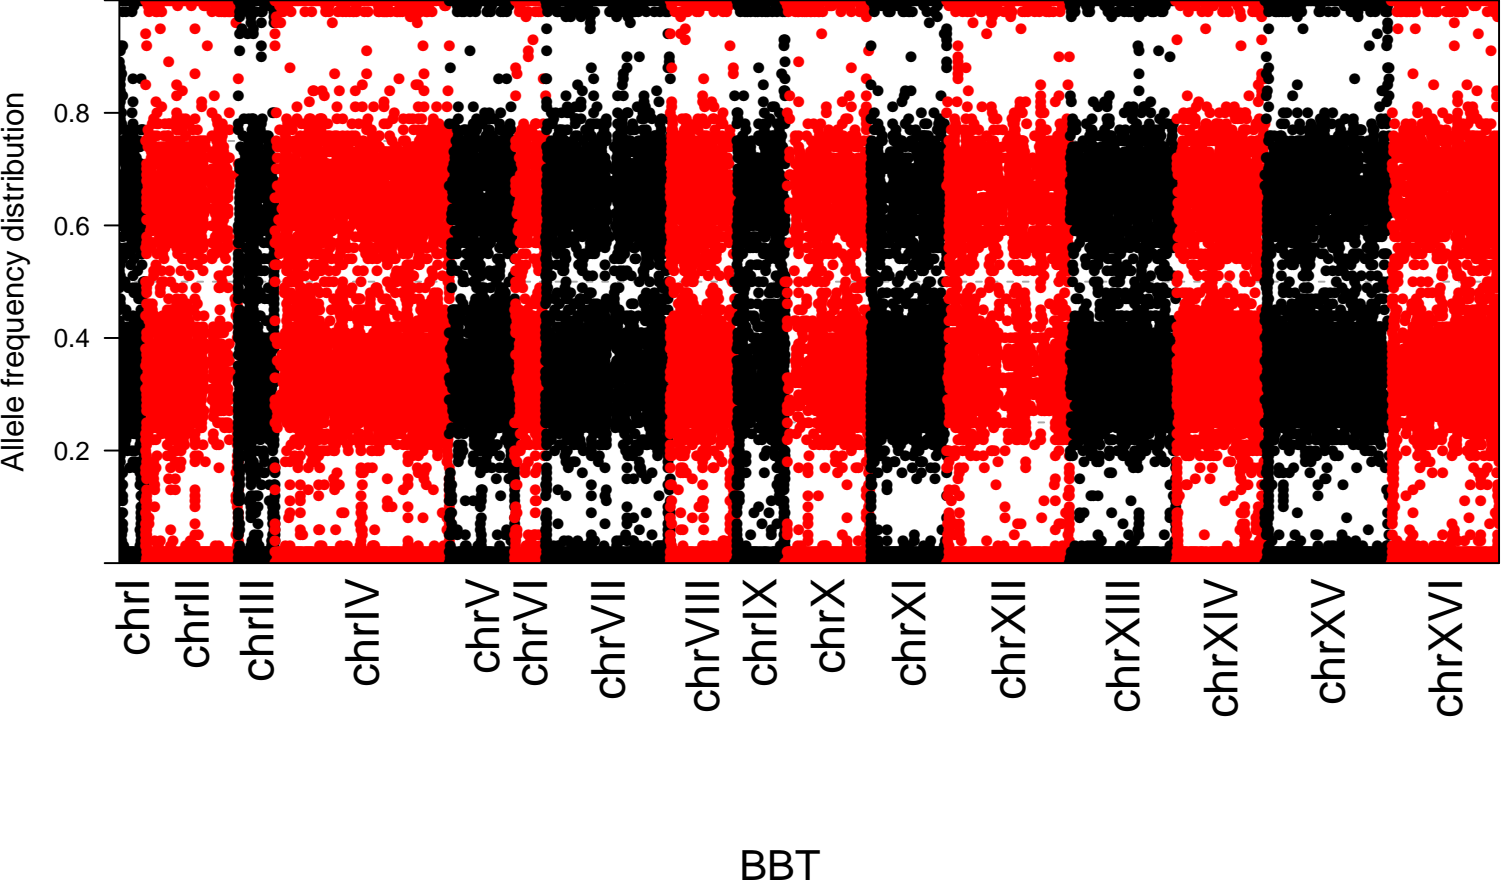

# Supplementary Figure S3

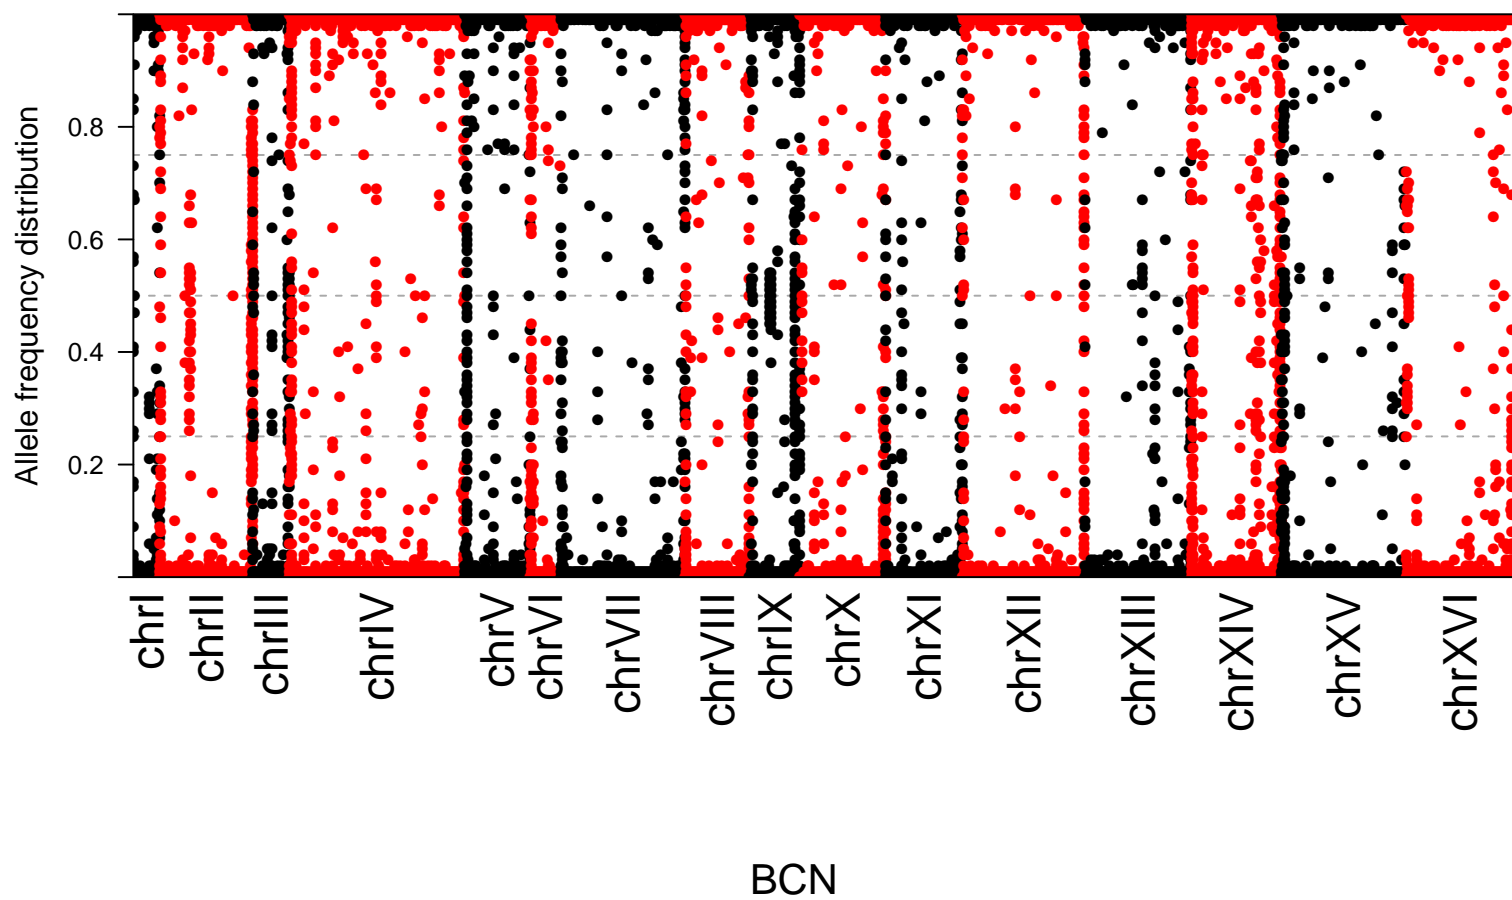

# Supplementary Figure S3

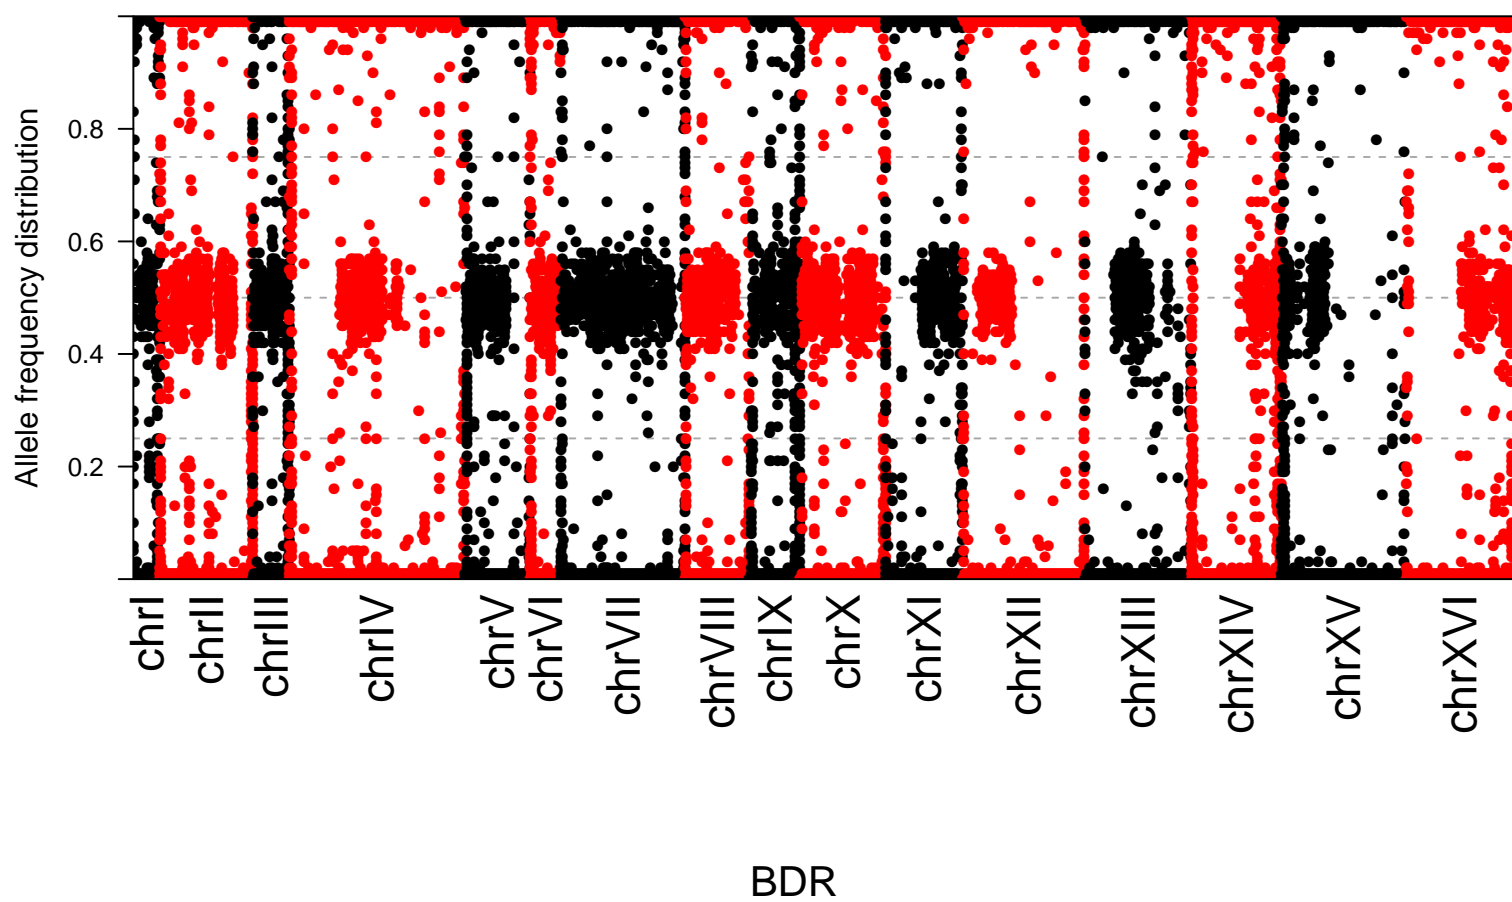

# Supplementary Figure S3

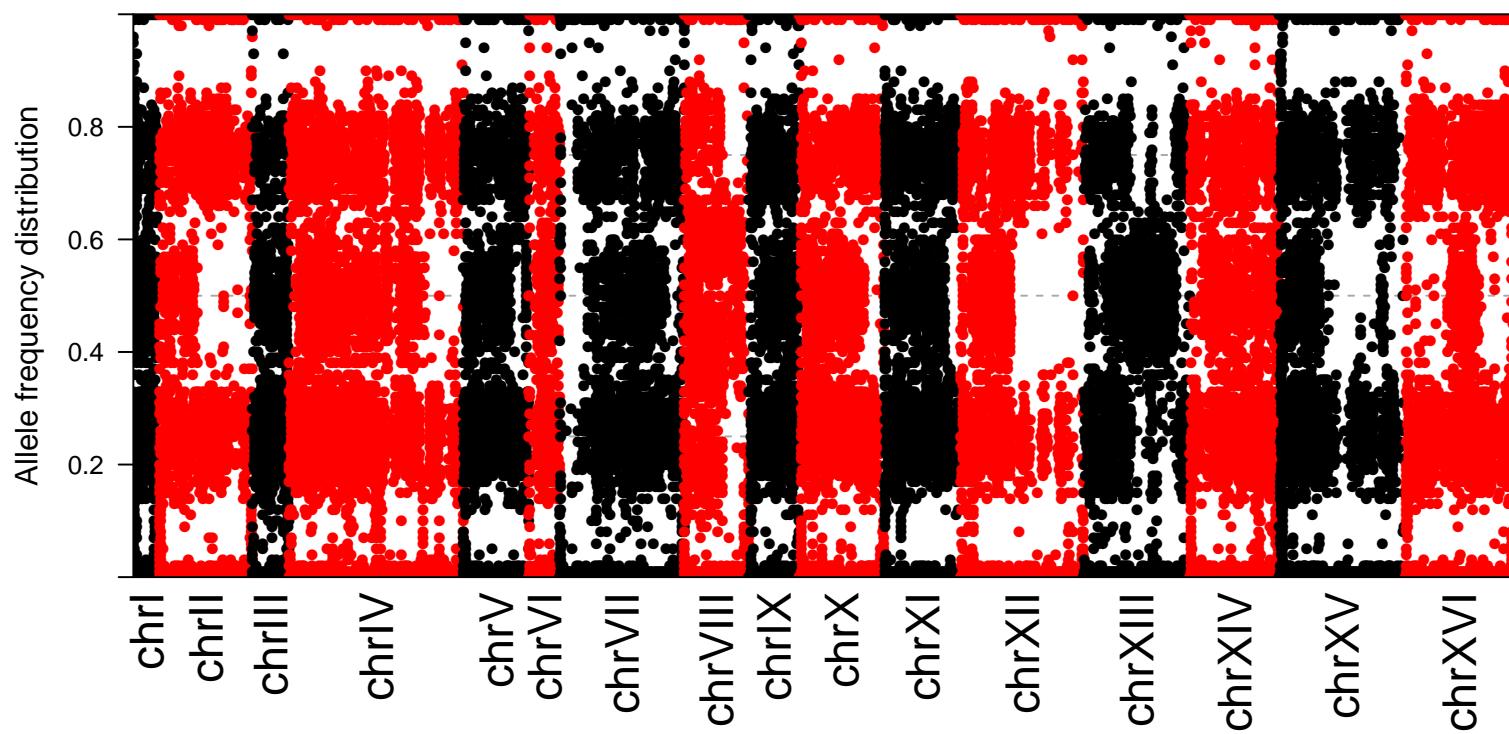

beer022



# Supplementary Figure S3

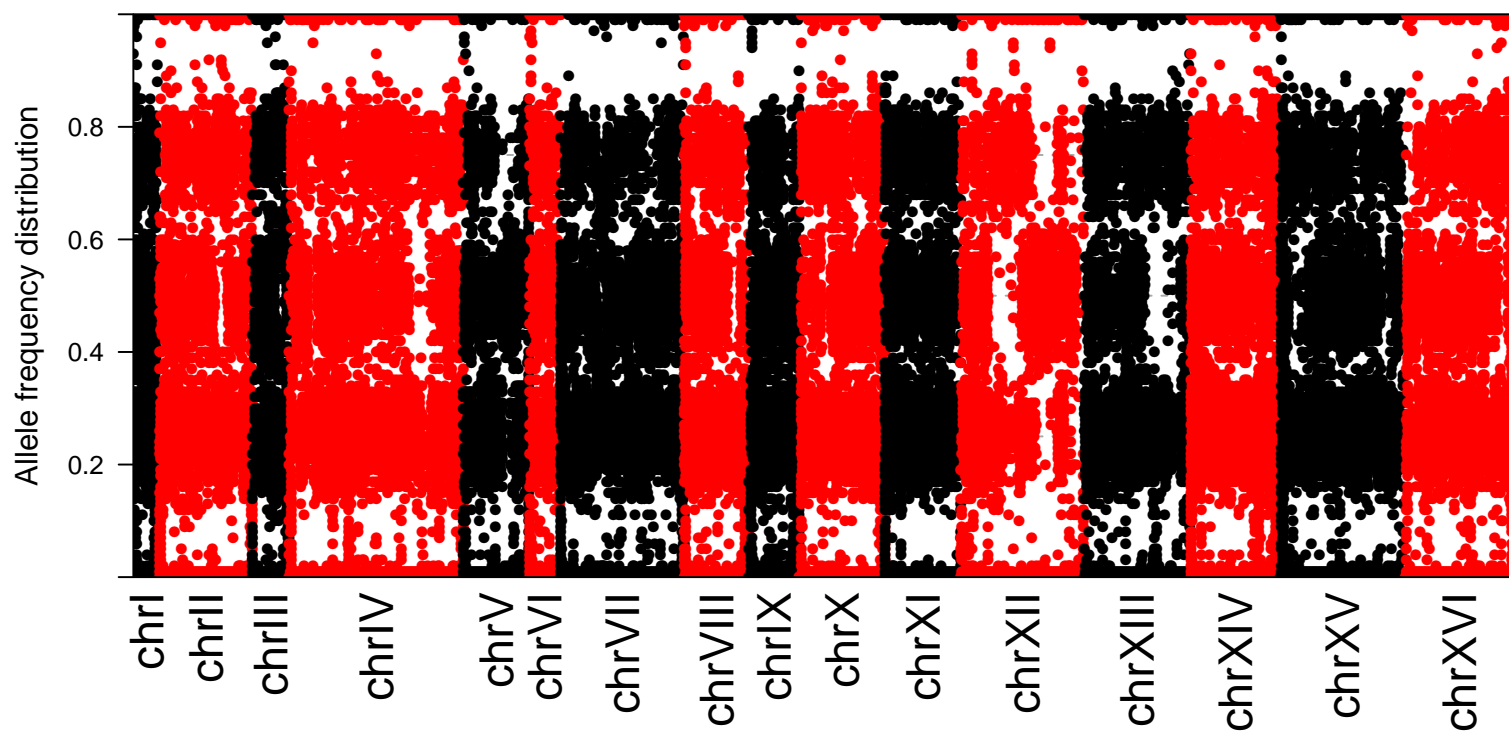

beer028

# Supplementary Figure S3

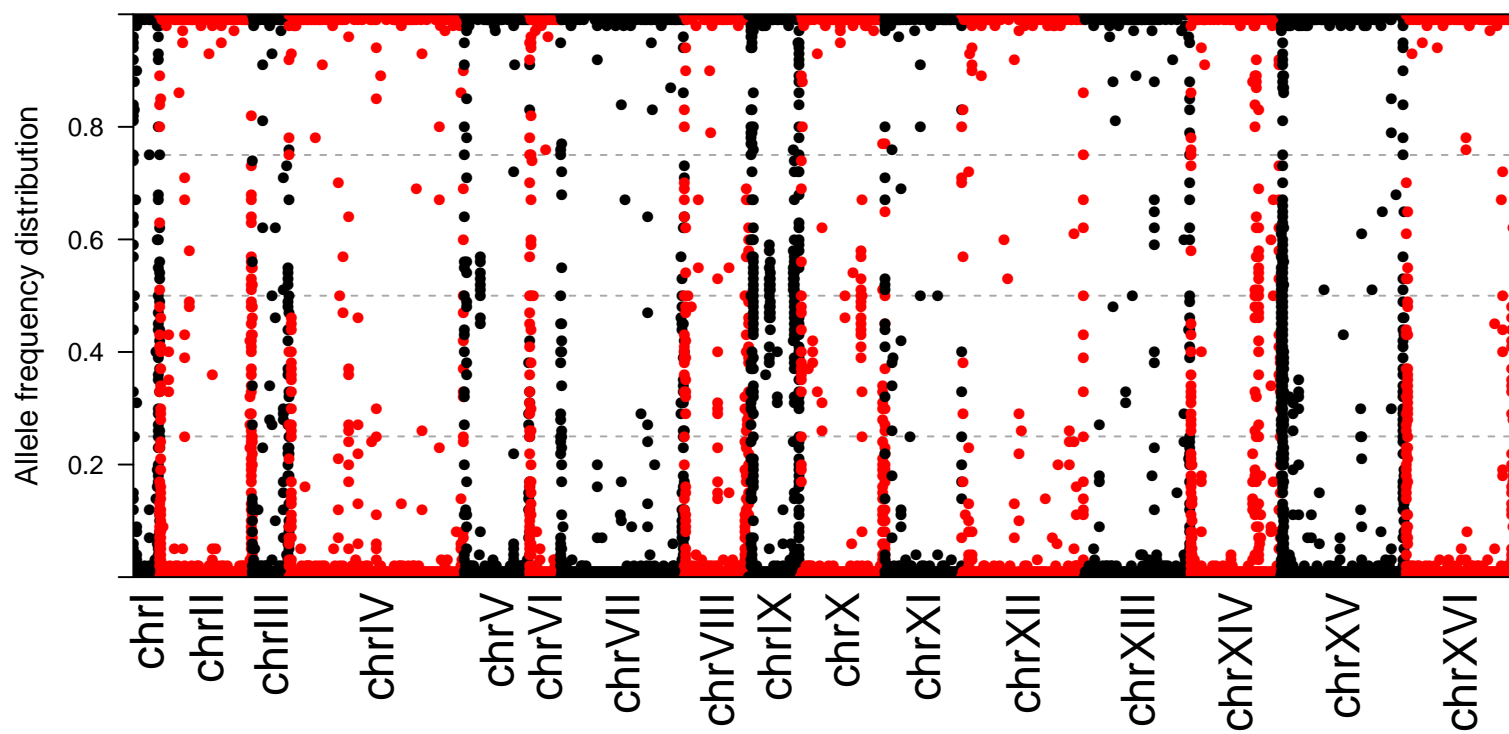

beer034

Supplementary Figure S3

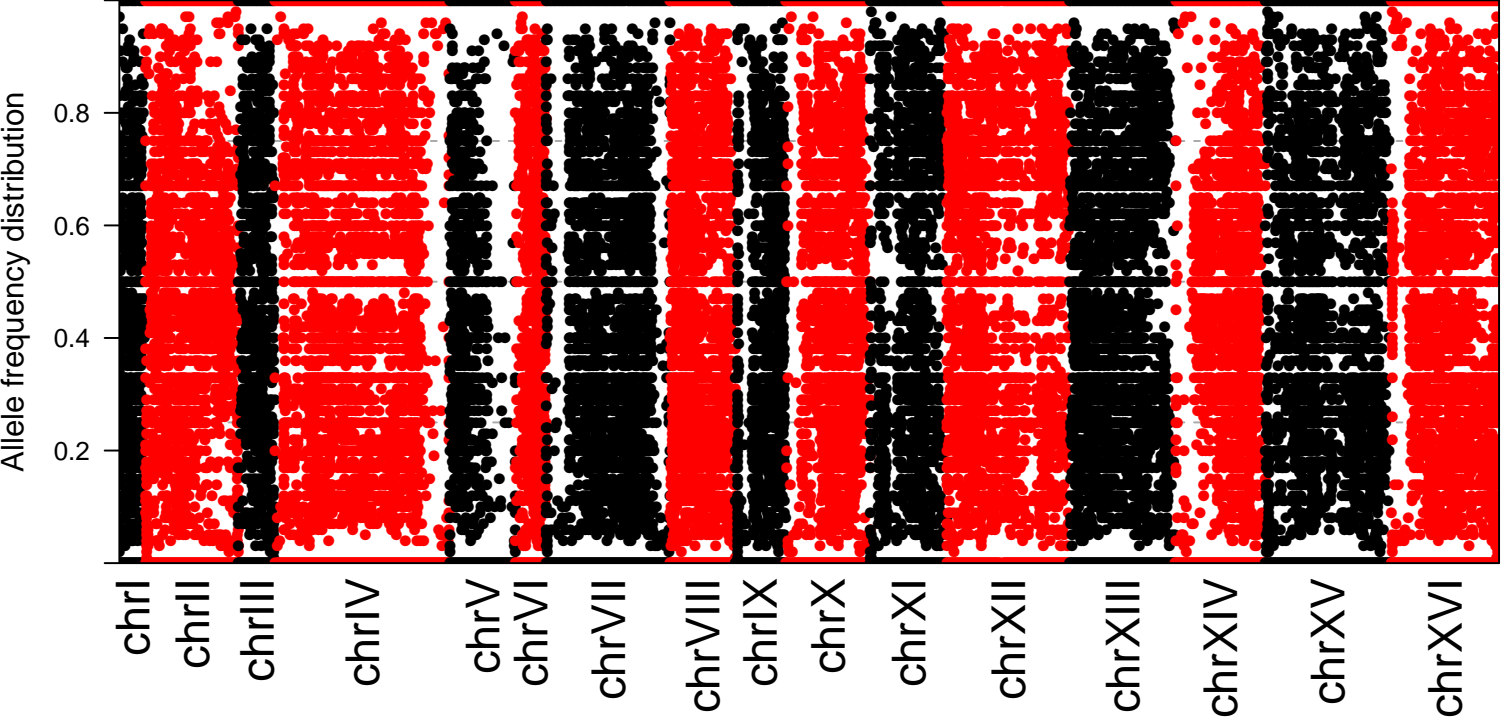

beer044

# Supplementary Figure S3

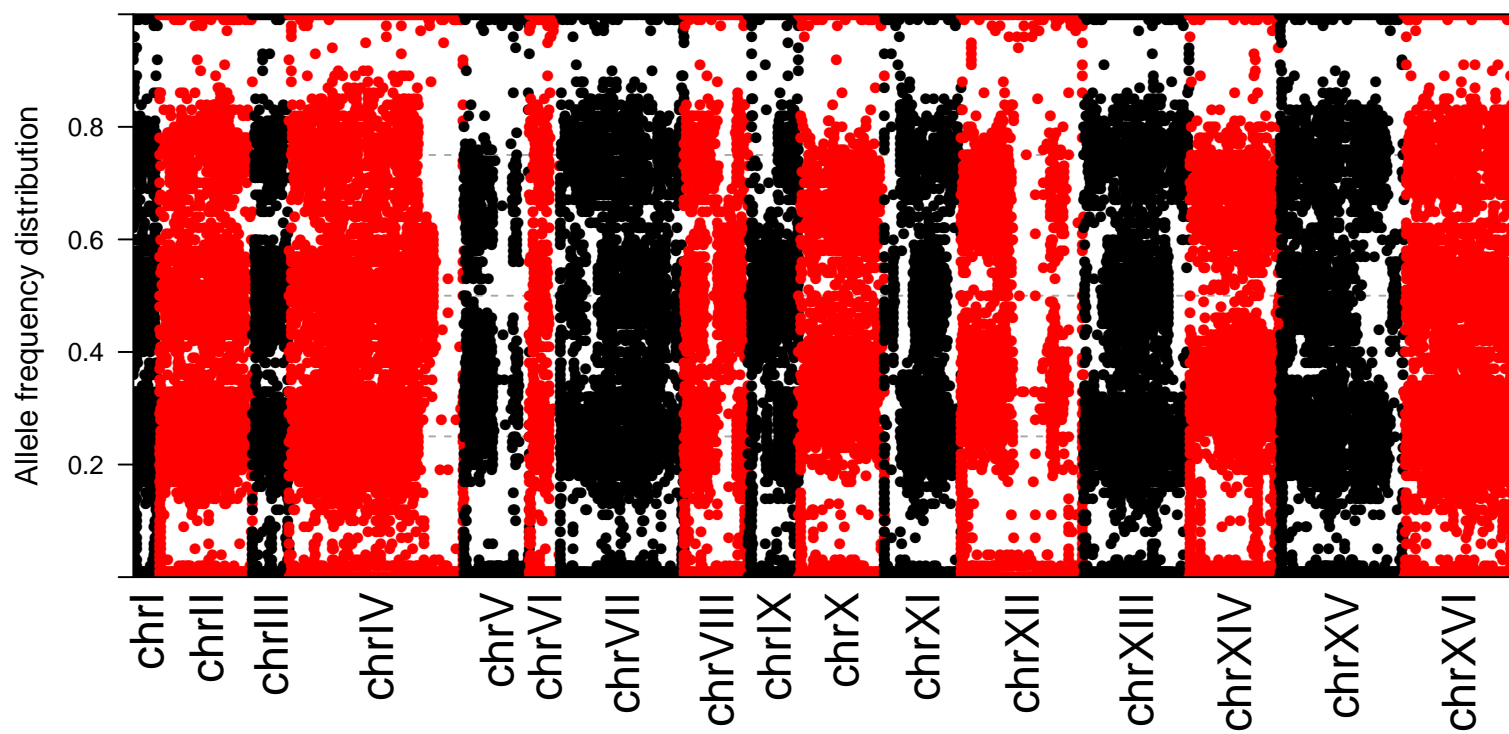

beer045

# Supplementary Figure S3

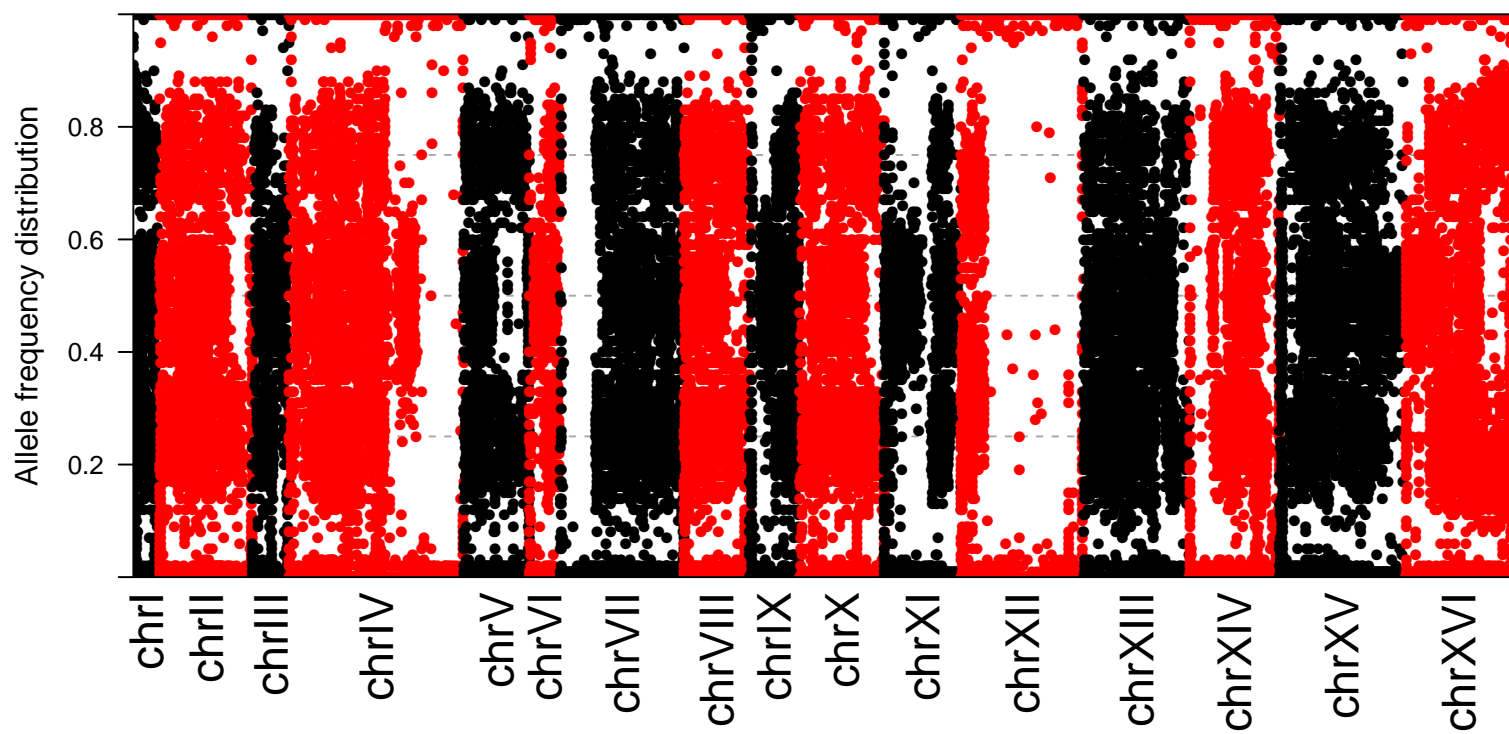

beer046

# Supplementary Figure S3

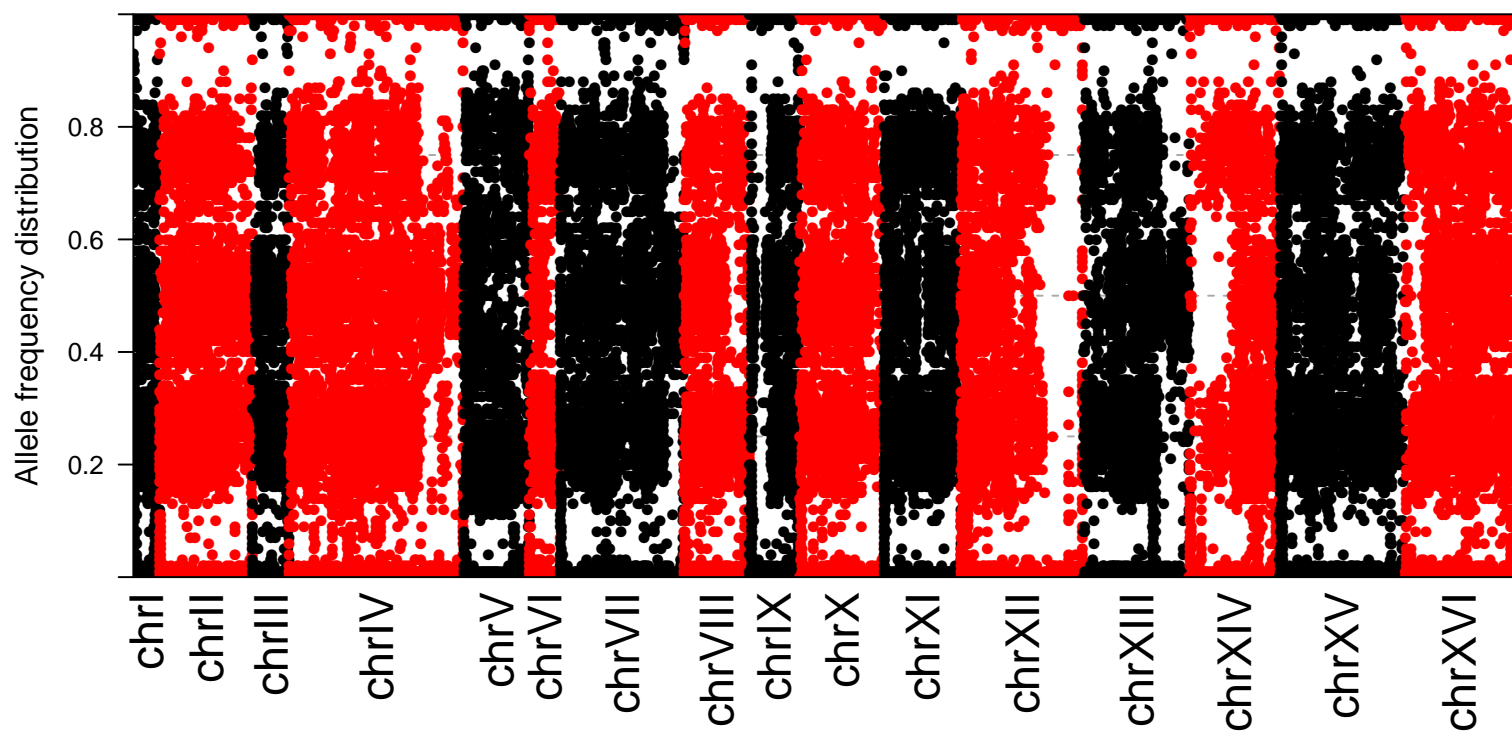

beer079

# Supplementary Figure S3

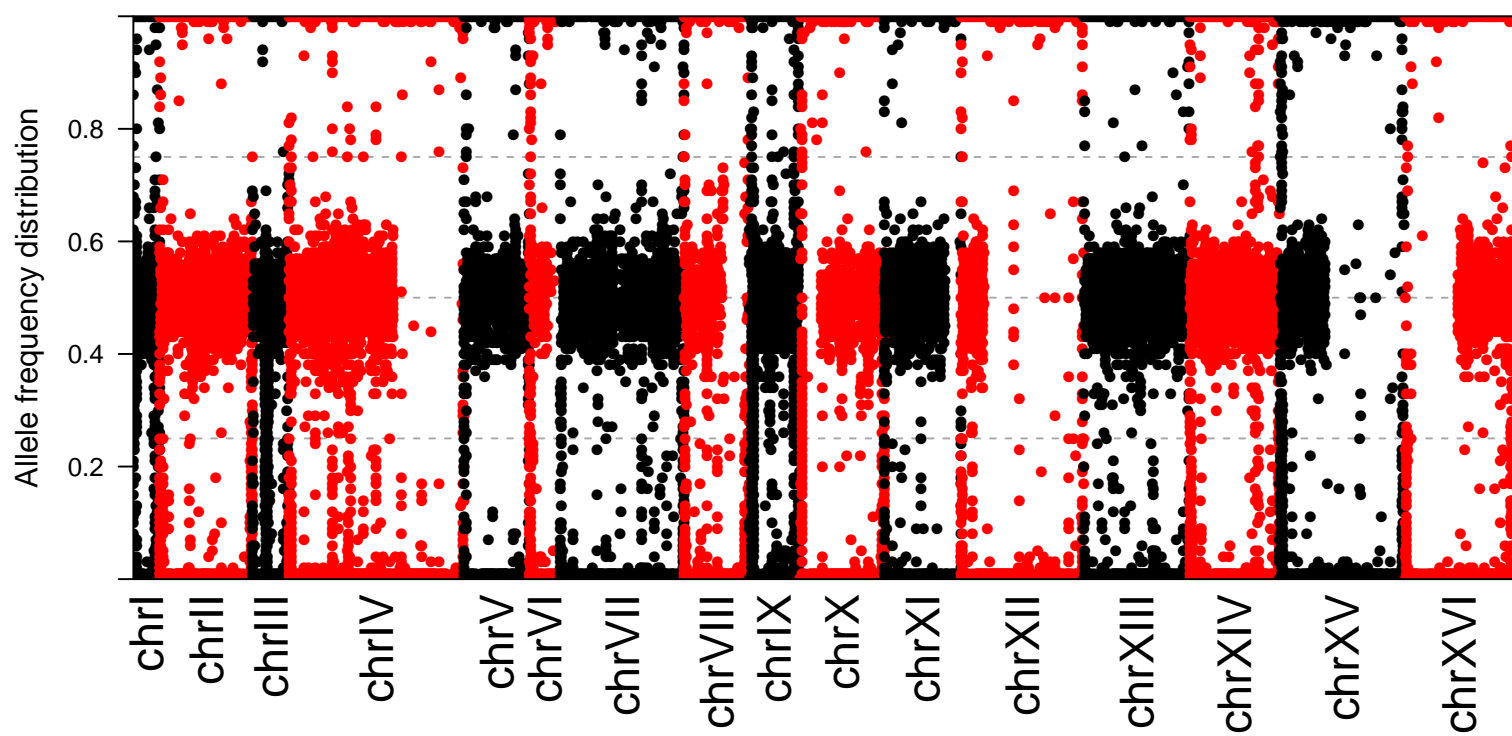

beer085

# Supplementary Figure S3

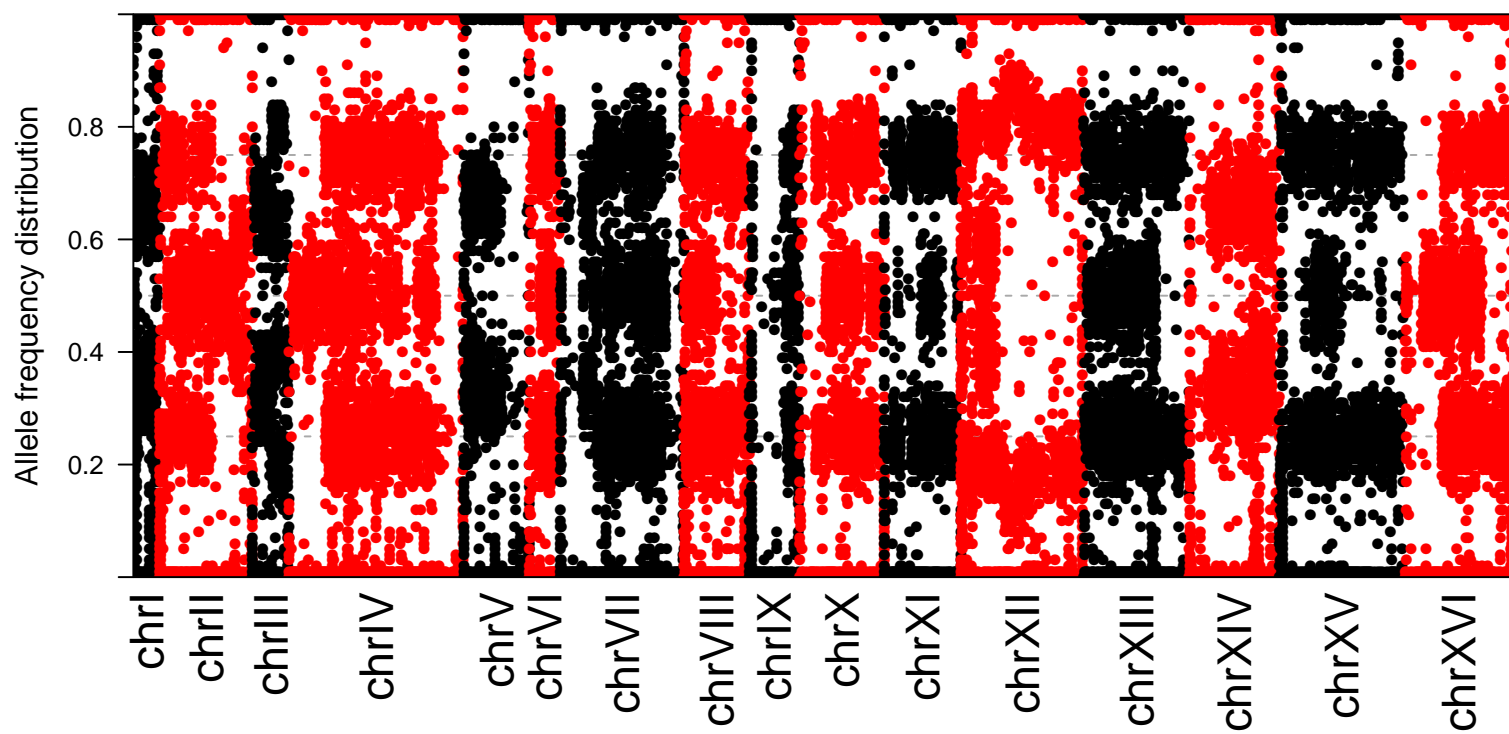

beer098



# Supplementary Figure S3

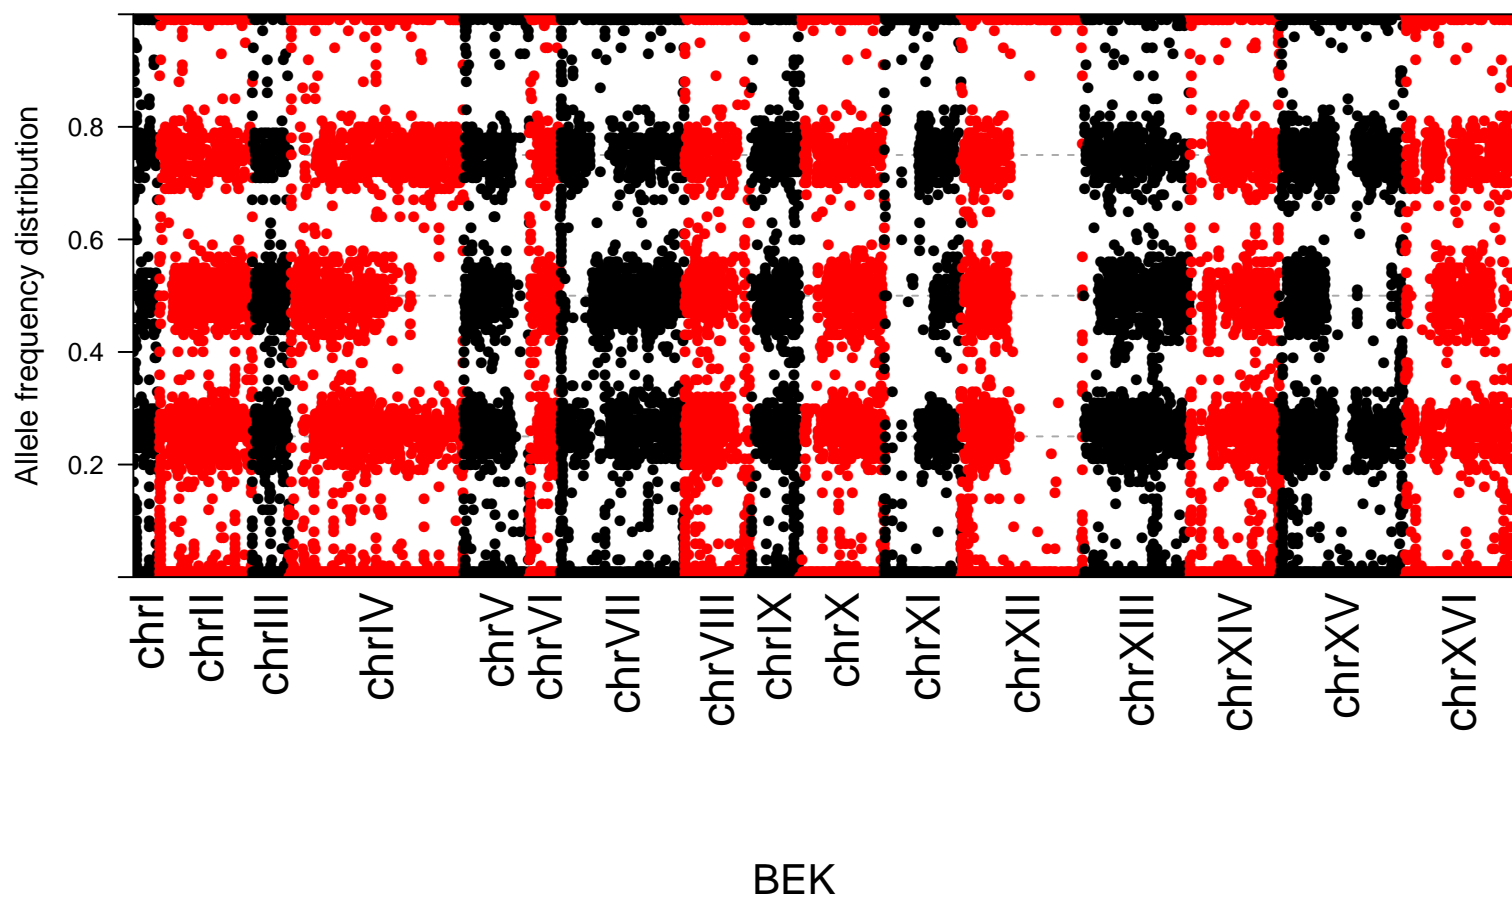

# Supplementary Figure S3

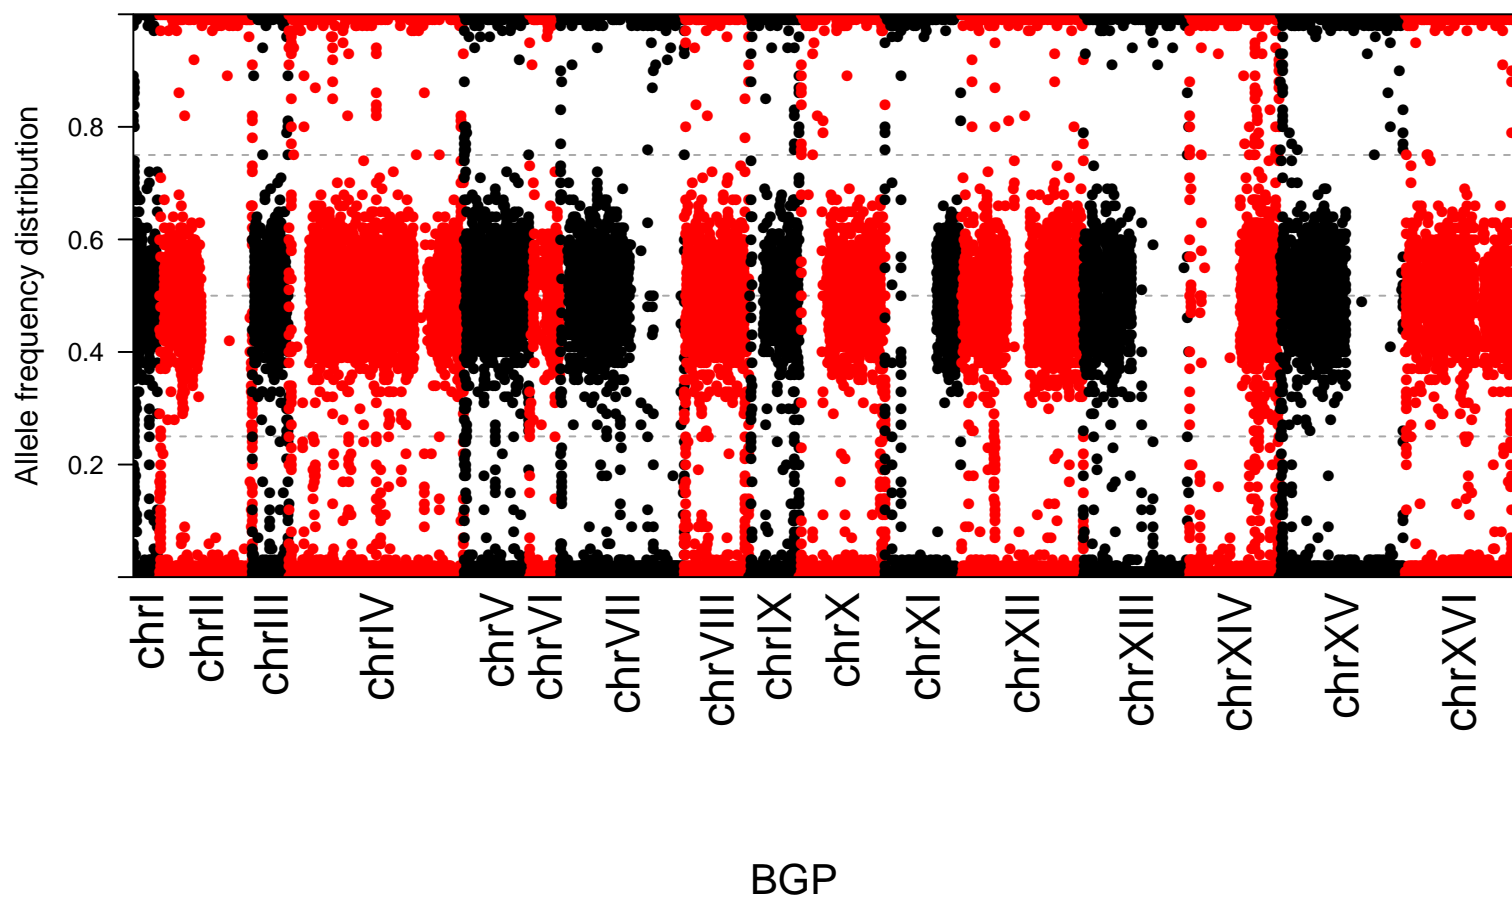

# Supplementary Figure S3

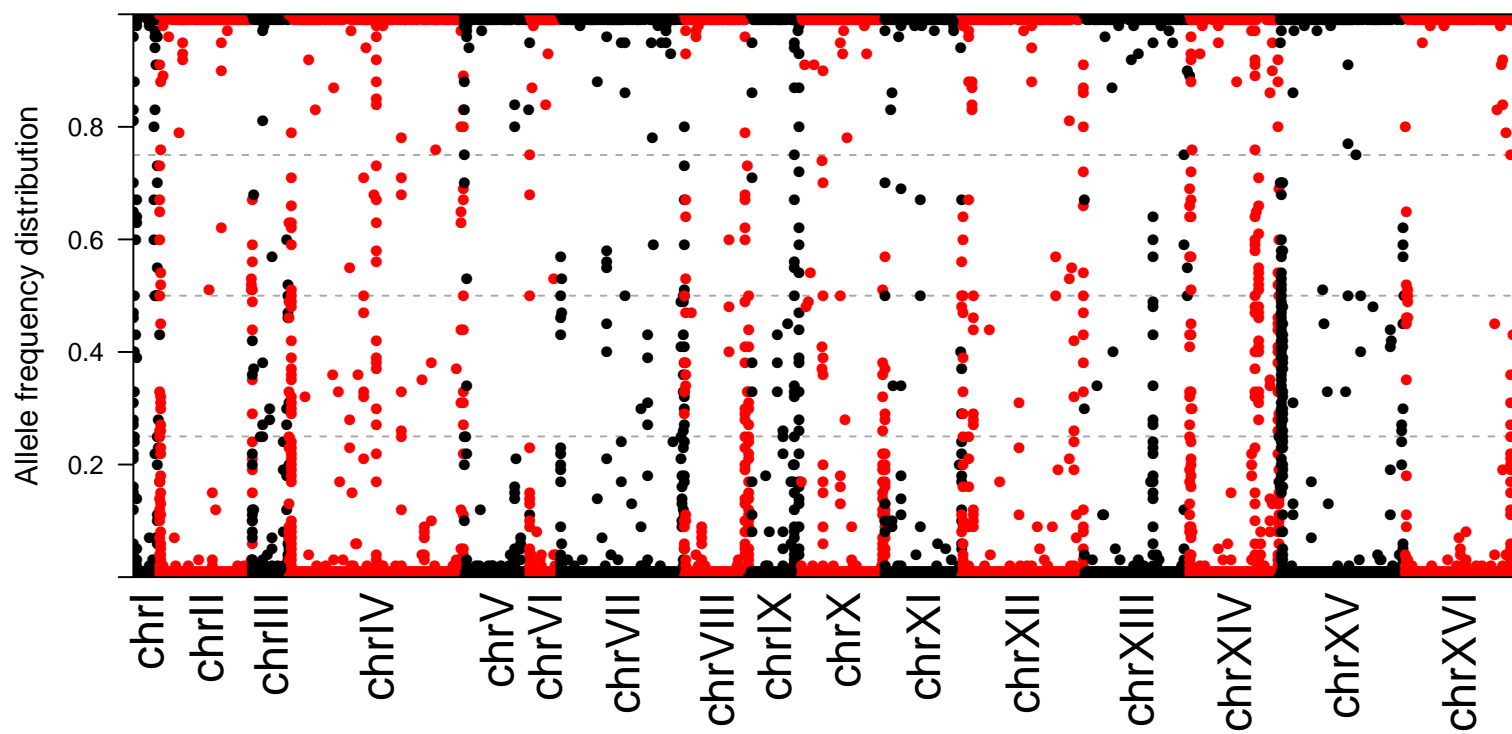

BIA

Supplementary Figure S3

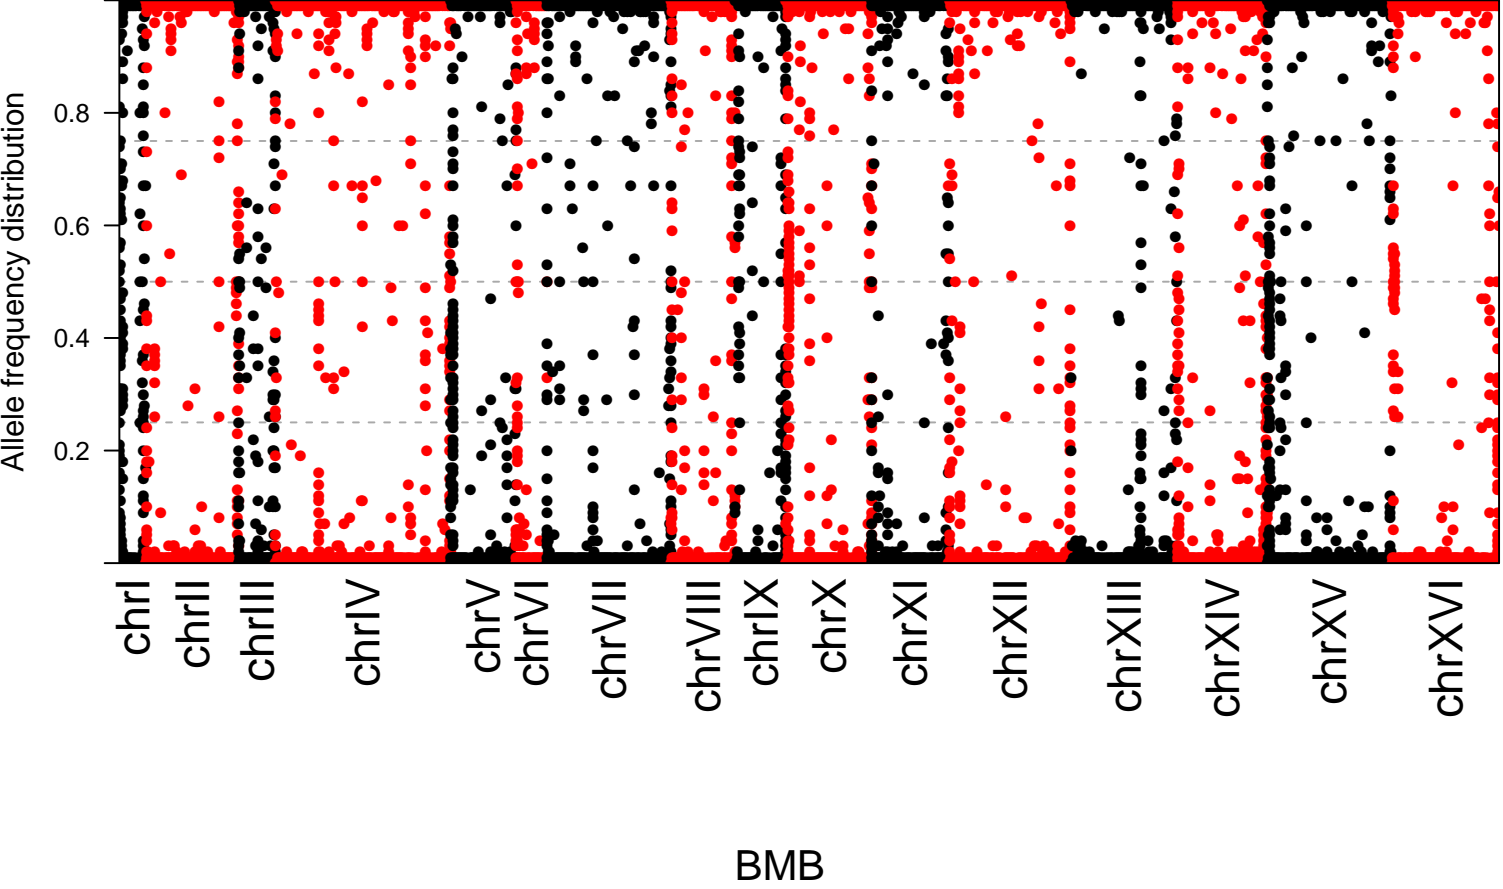

# Supplementary Figure S3

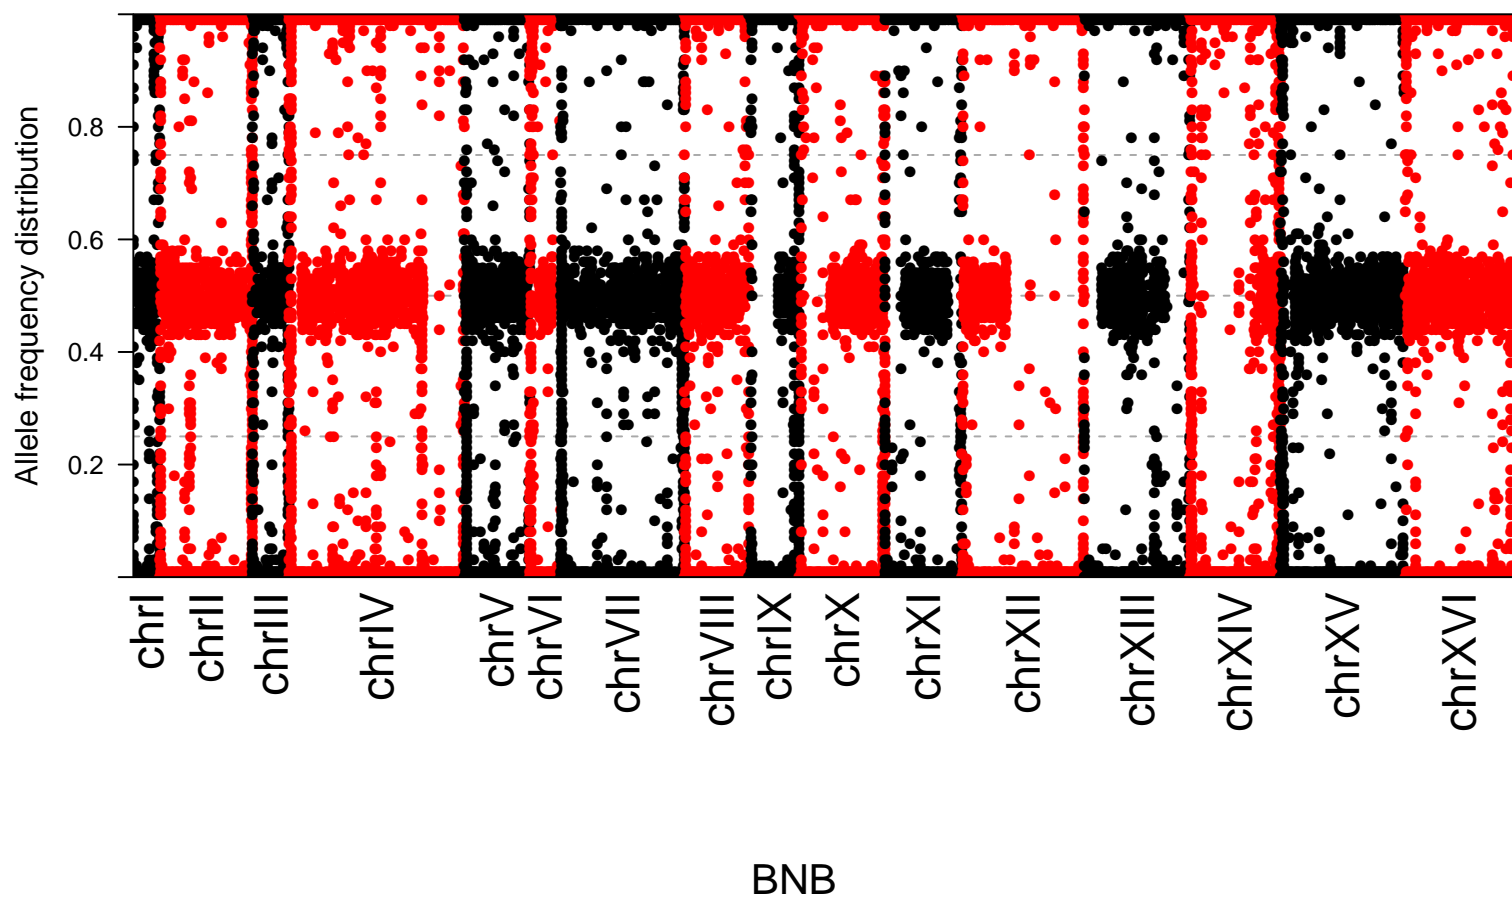

# Supplementary Figure S3

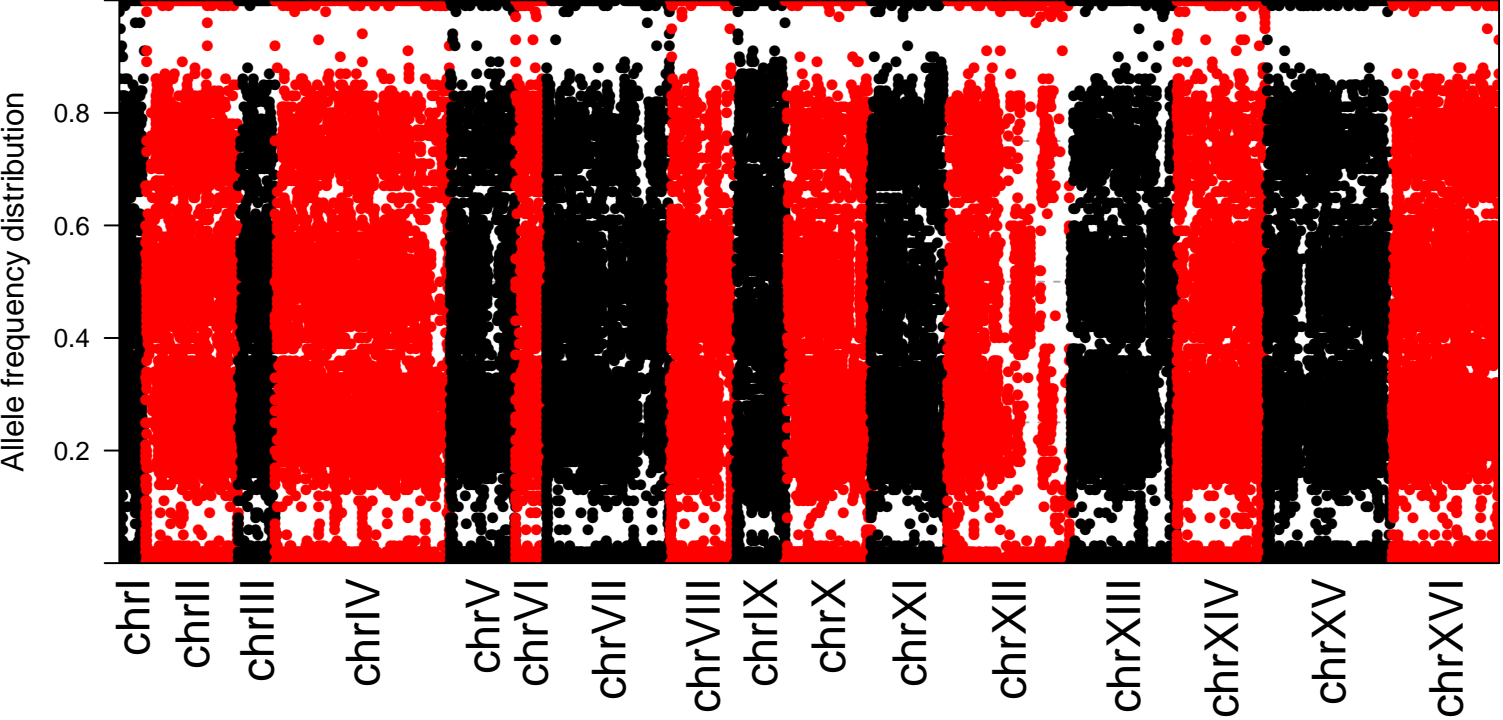

bread004

Supplementary Figure S3

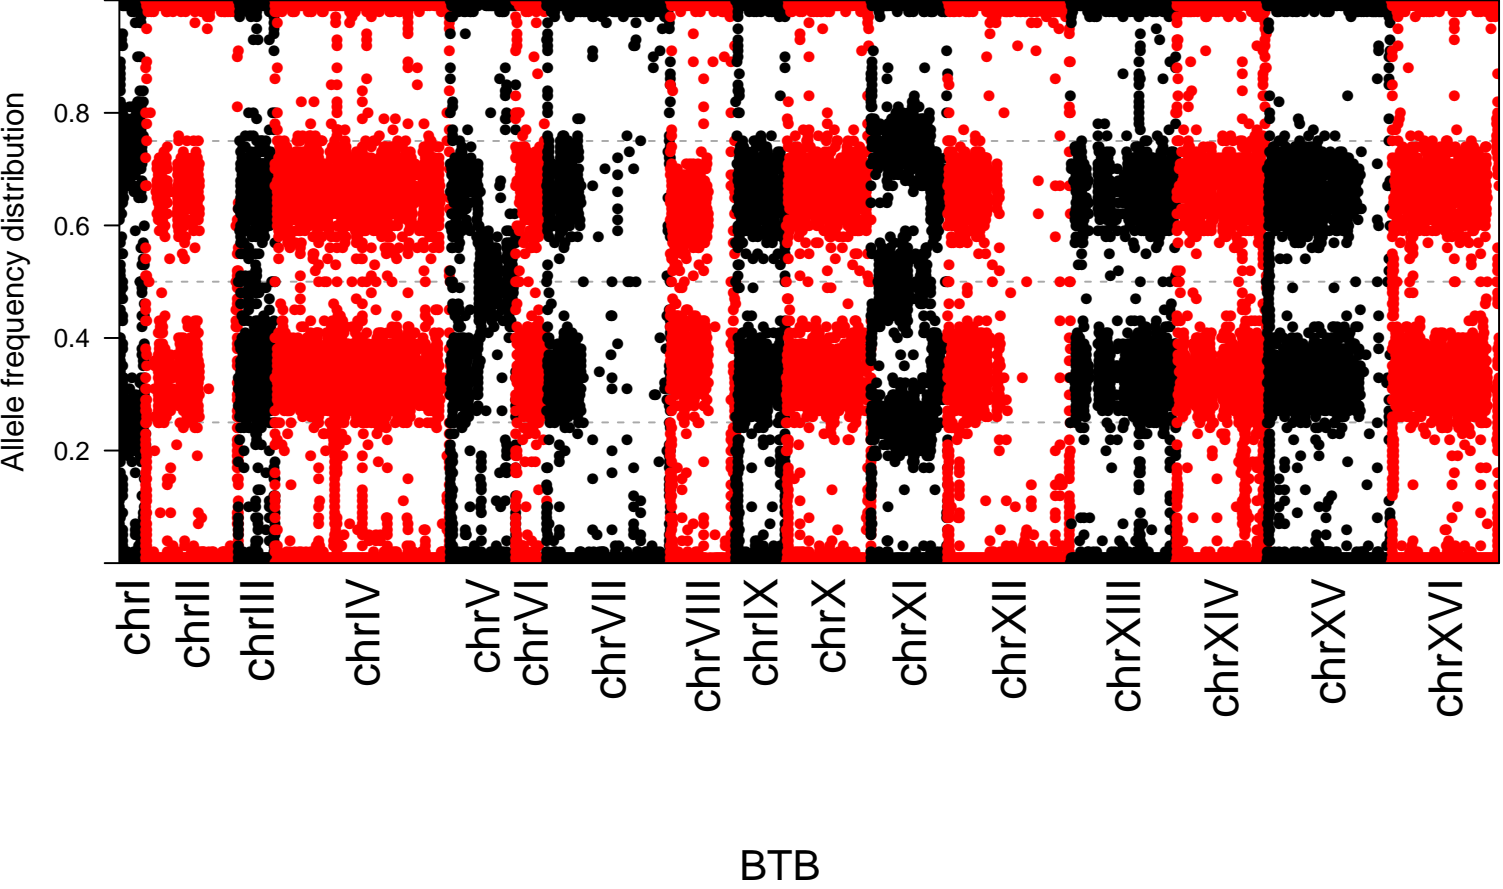

Supplementary Figure S3

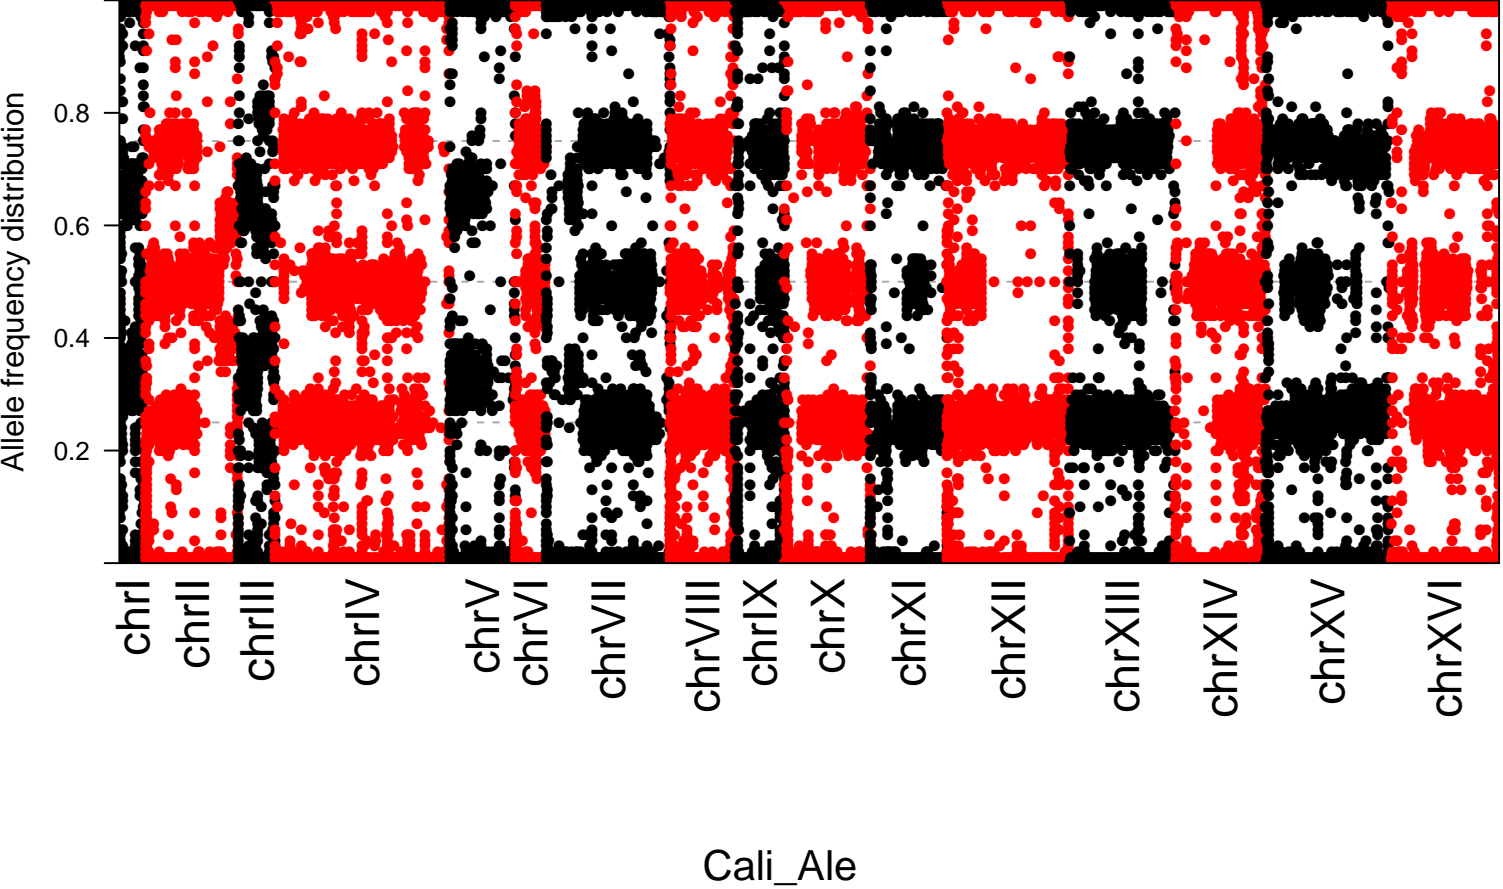



# Supplementary Figure S3

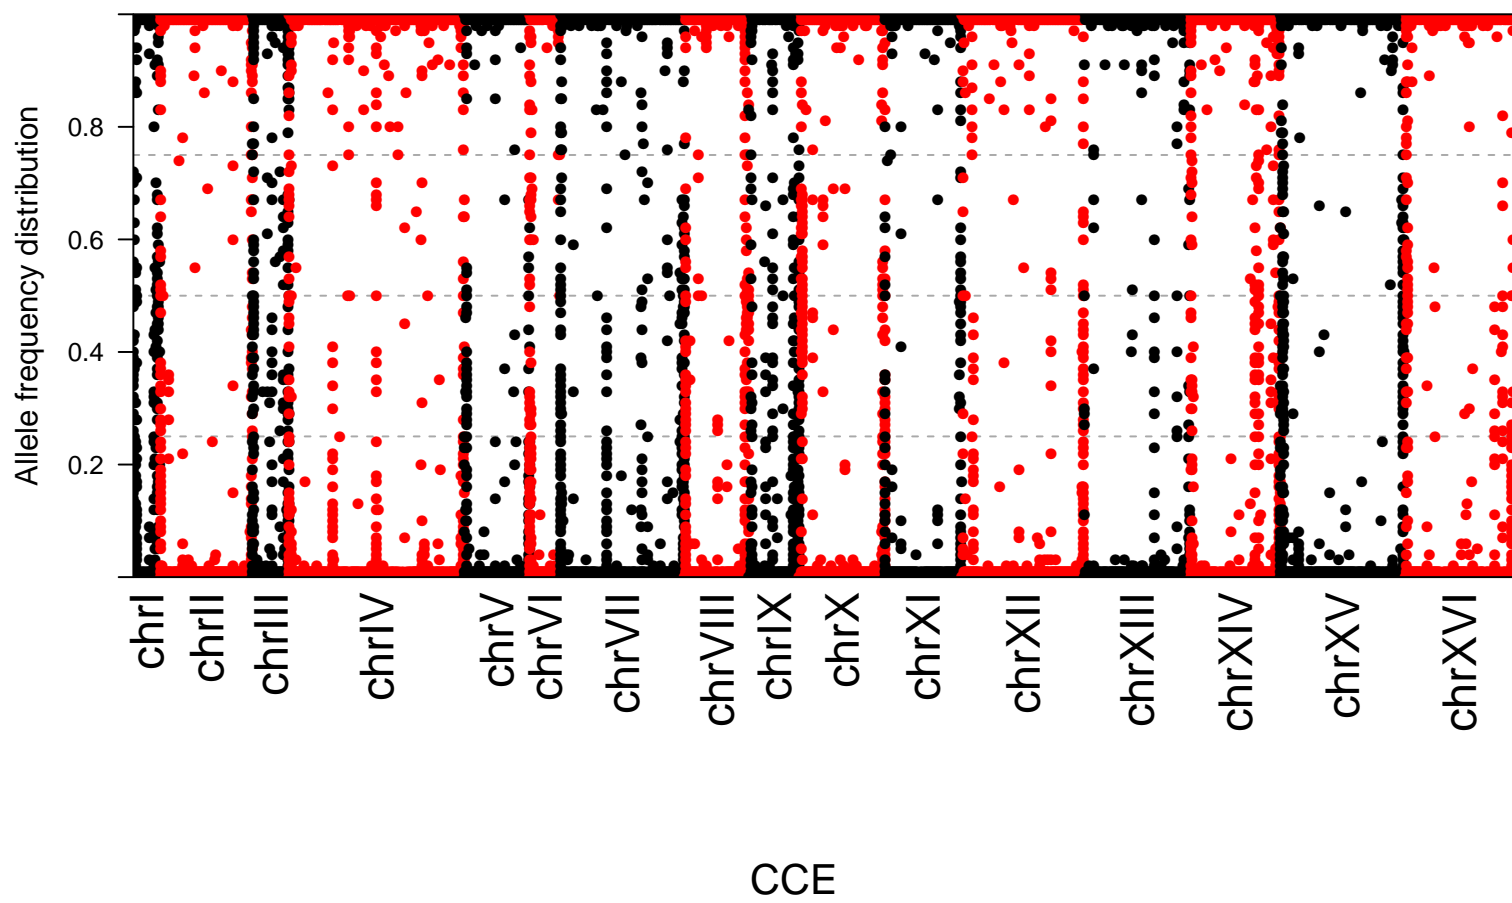

# Supplementary Figure S3

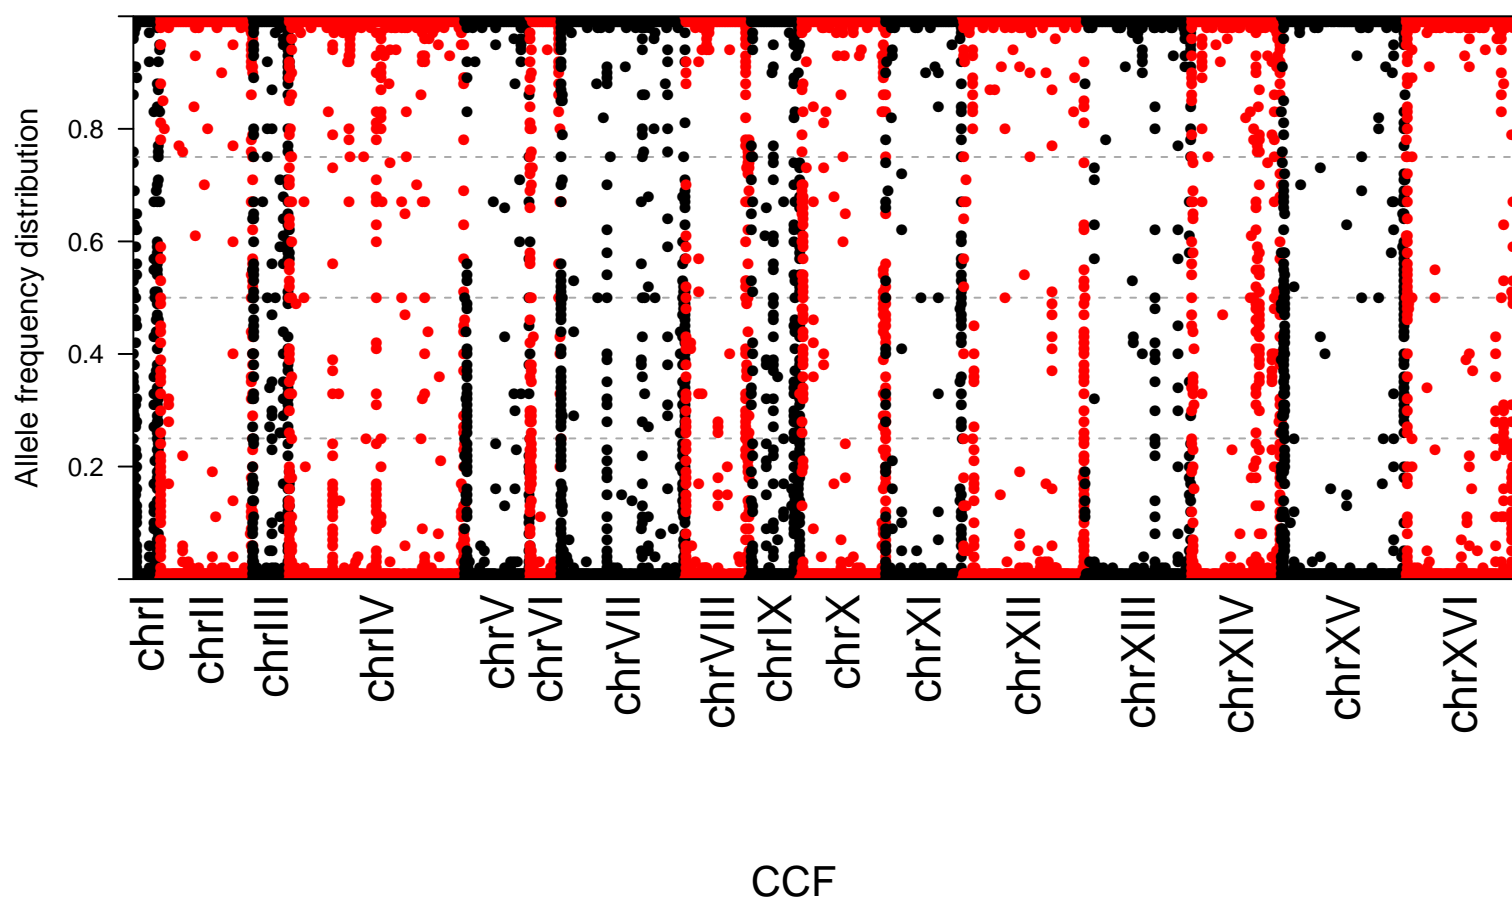

# Supplementary Figure S3

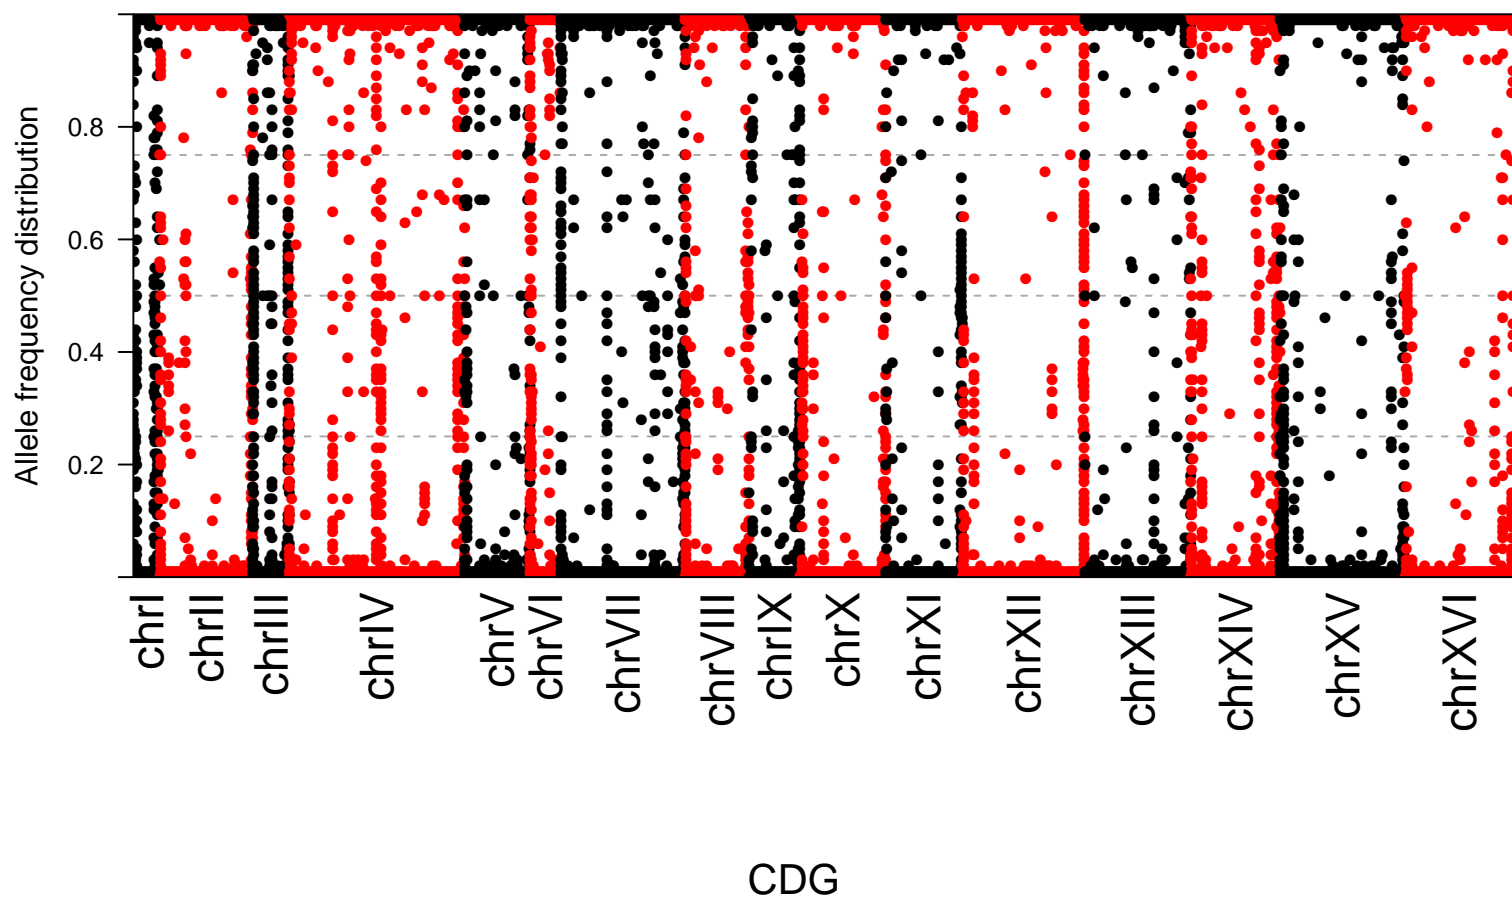

# Supplementary Figure S3

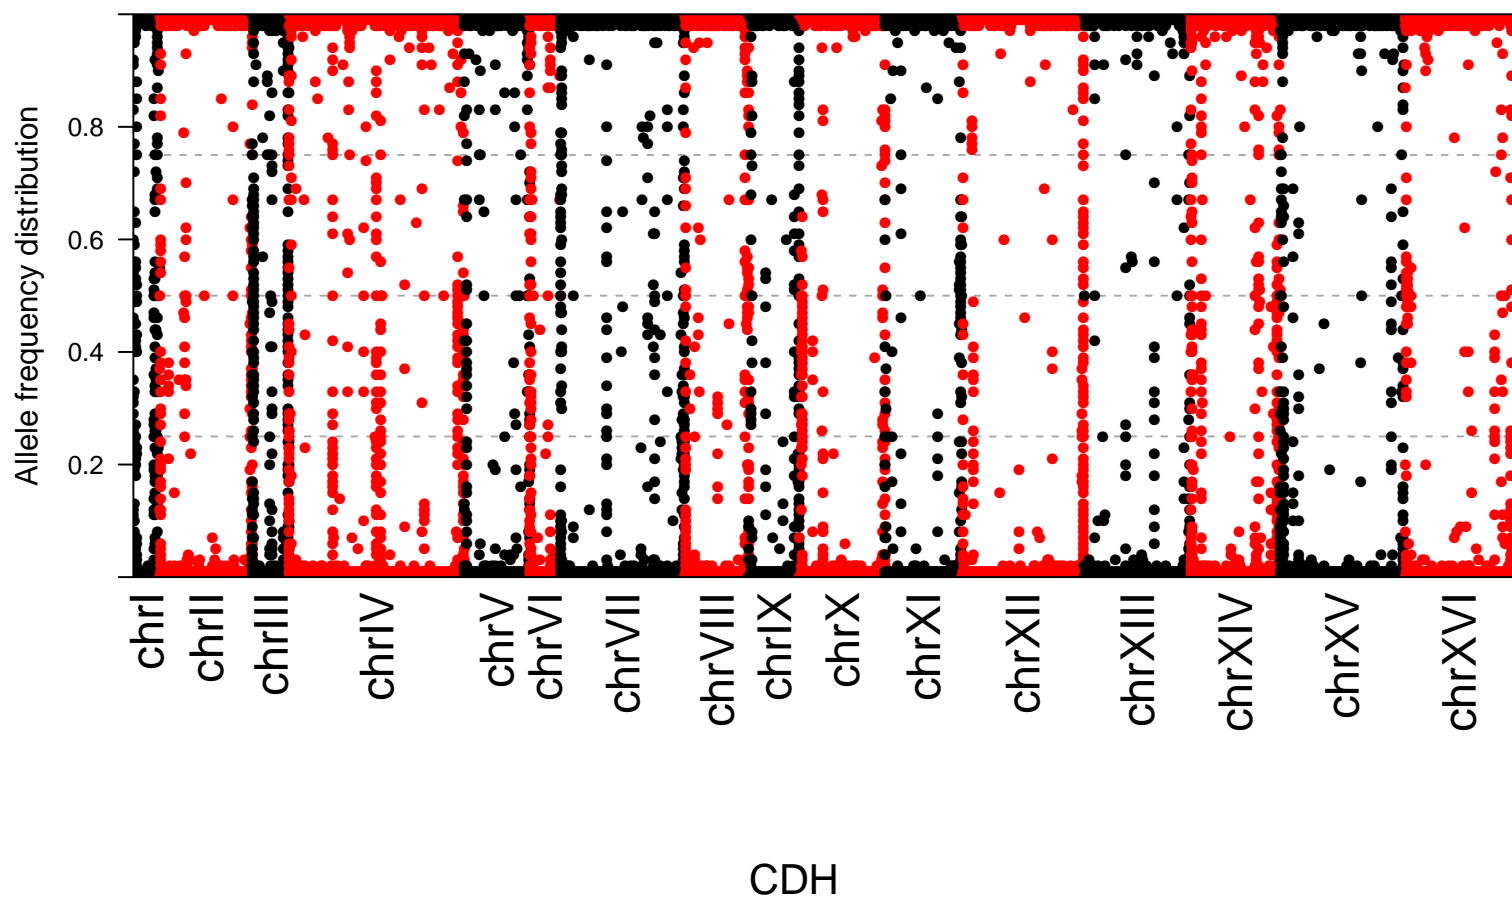

# Supplementary Figure S3

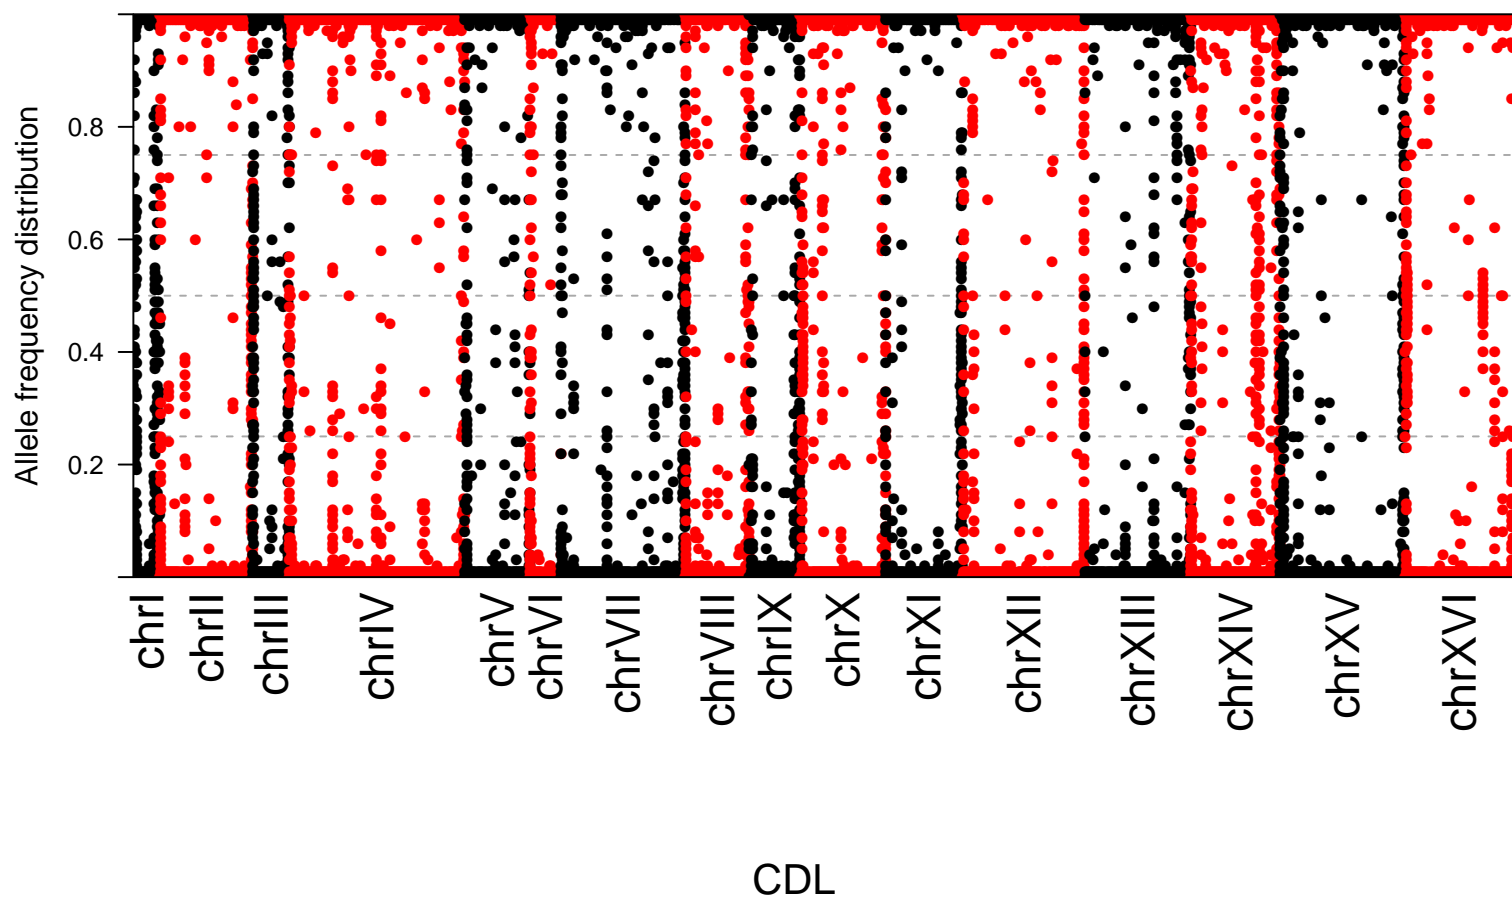

# Supplementary Figure S3

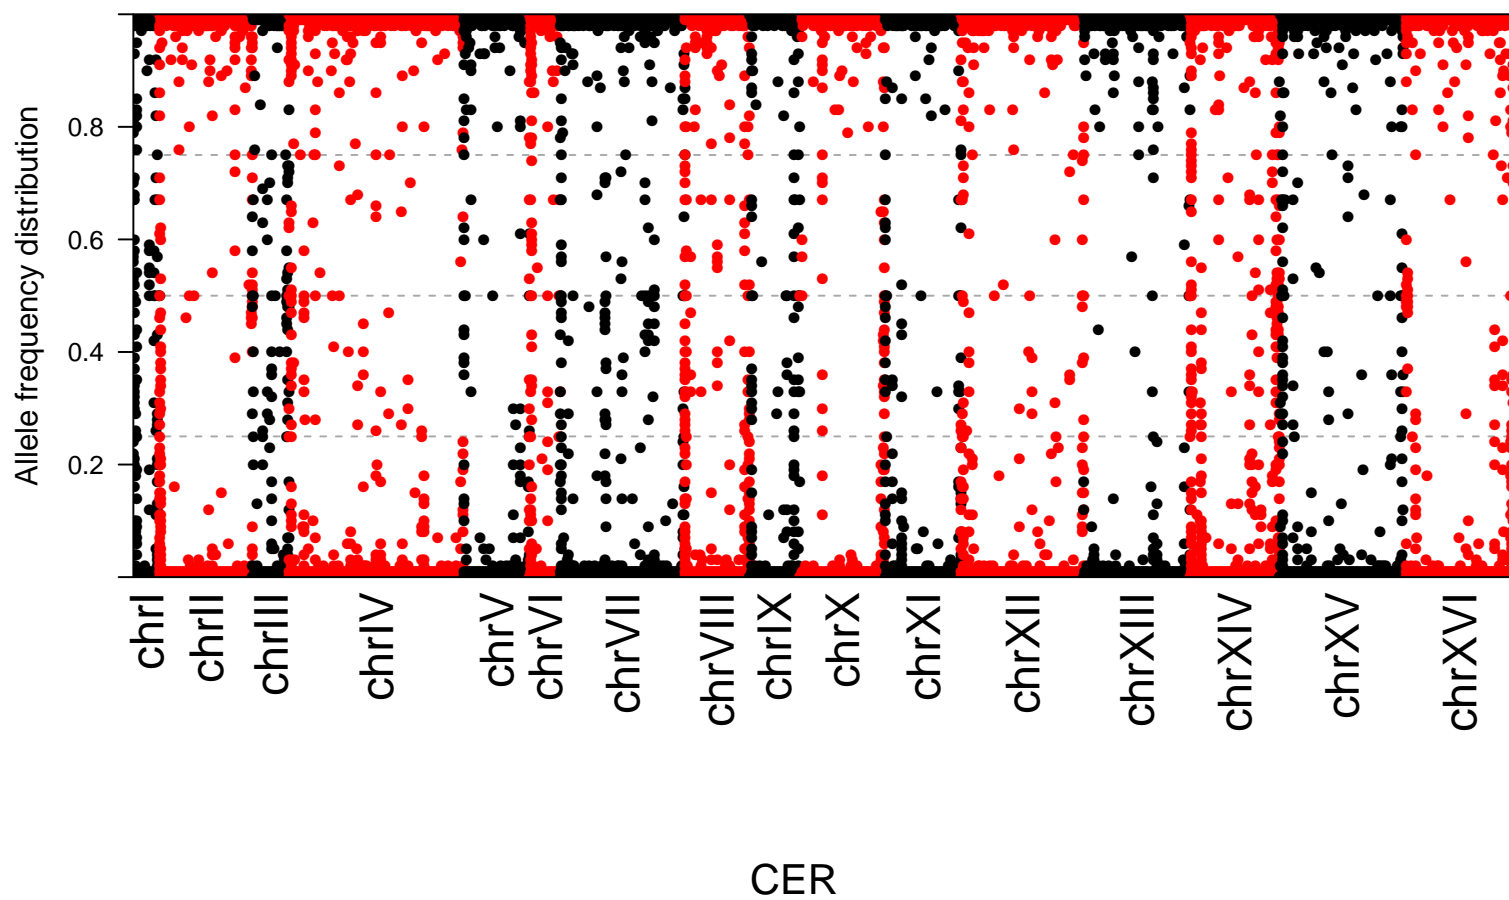

Supplementary Figure S3

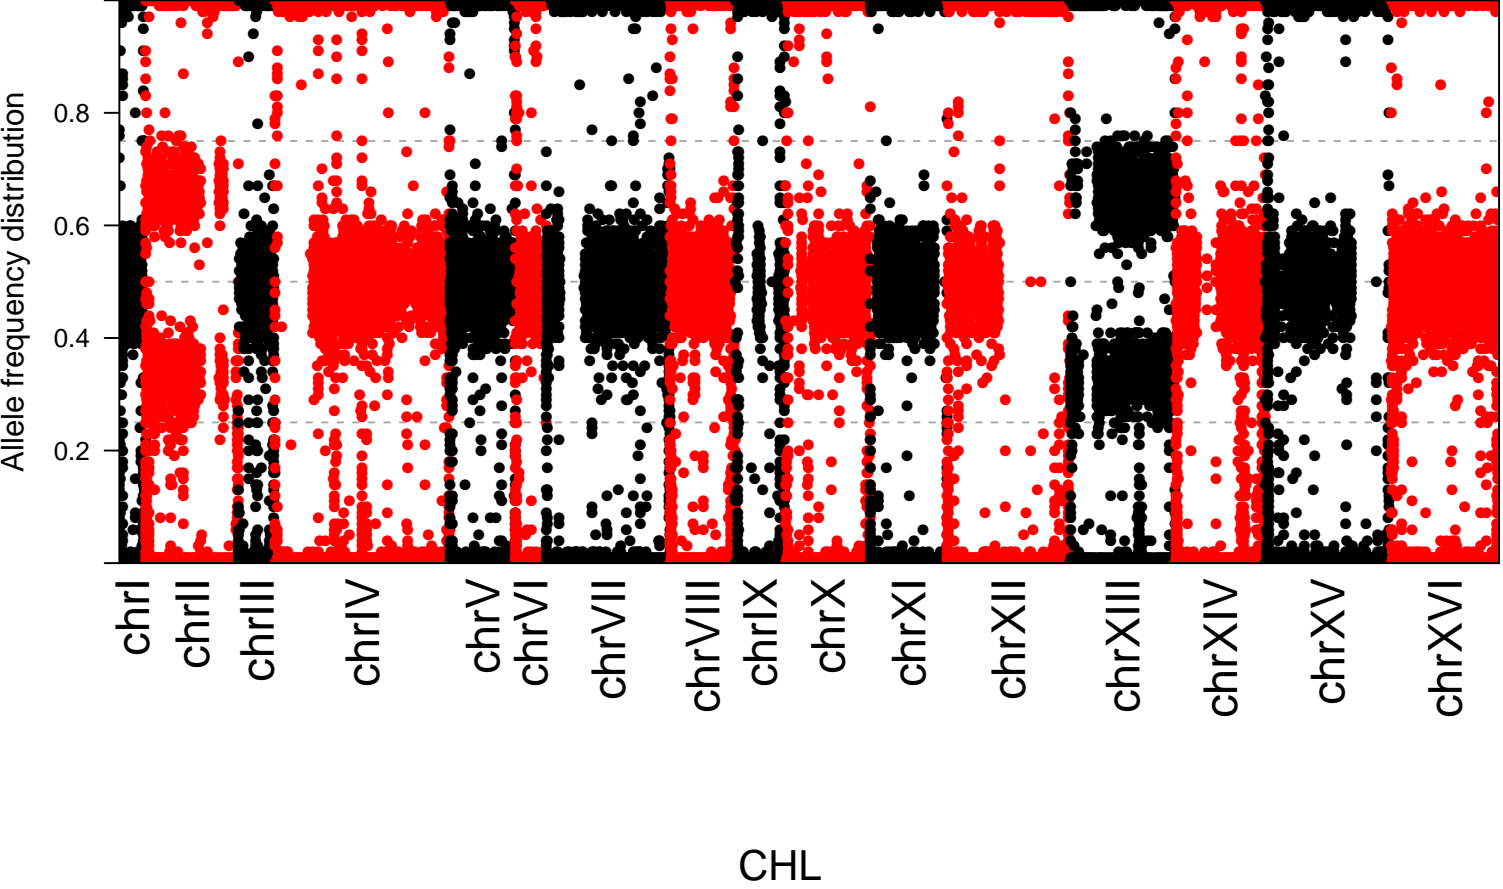

# Supplementary Figure S3

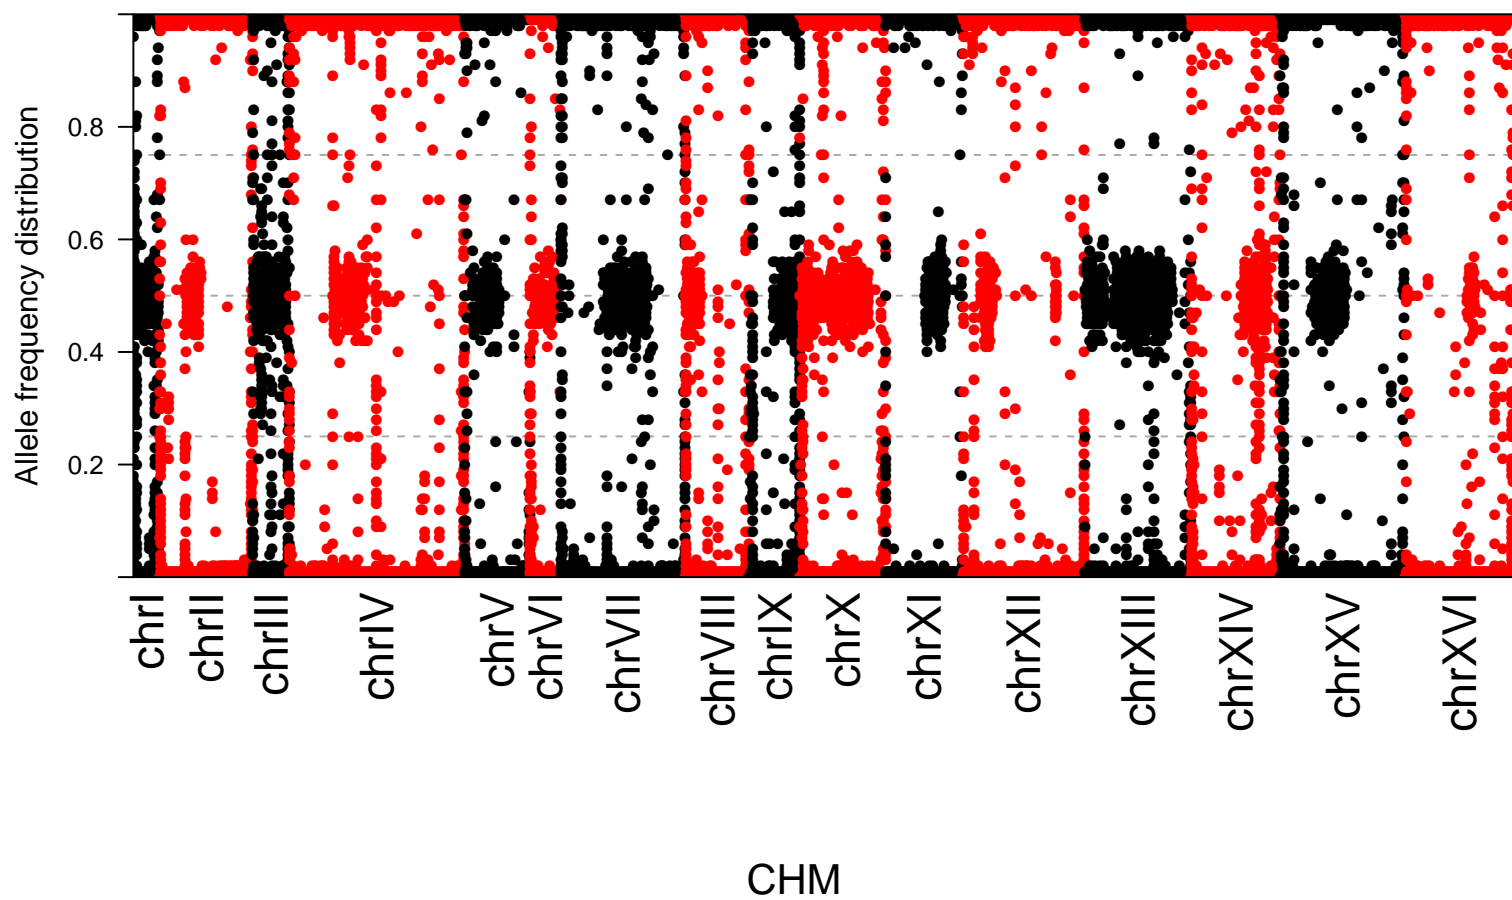



# Supplementary Figure S3

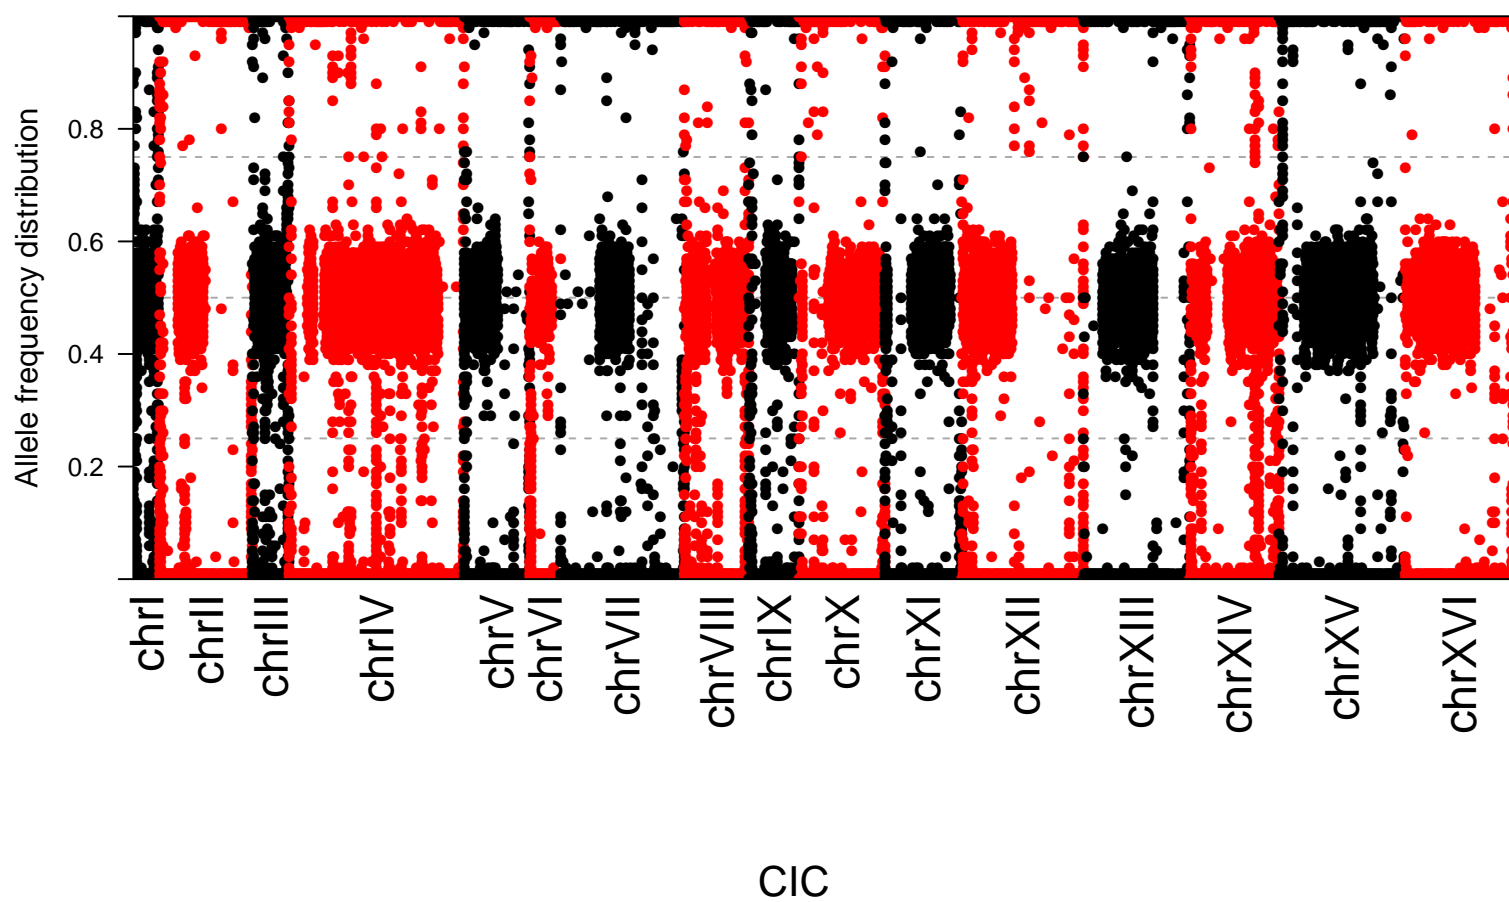

# Supplementary Figure S3

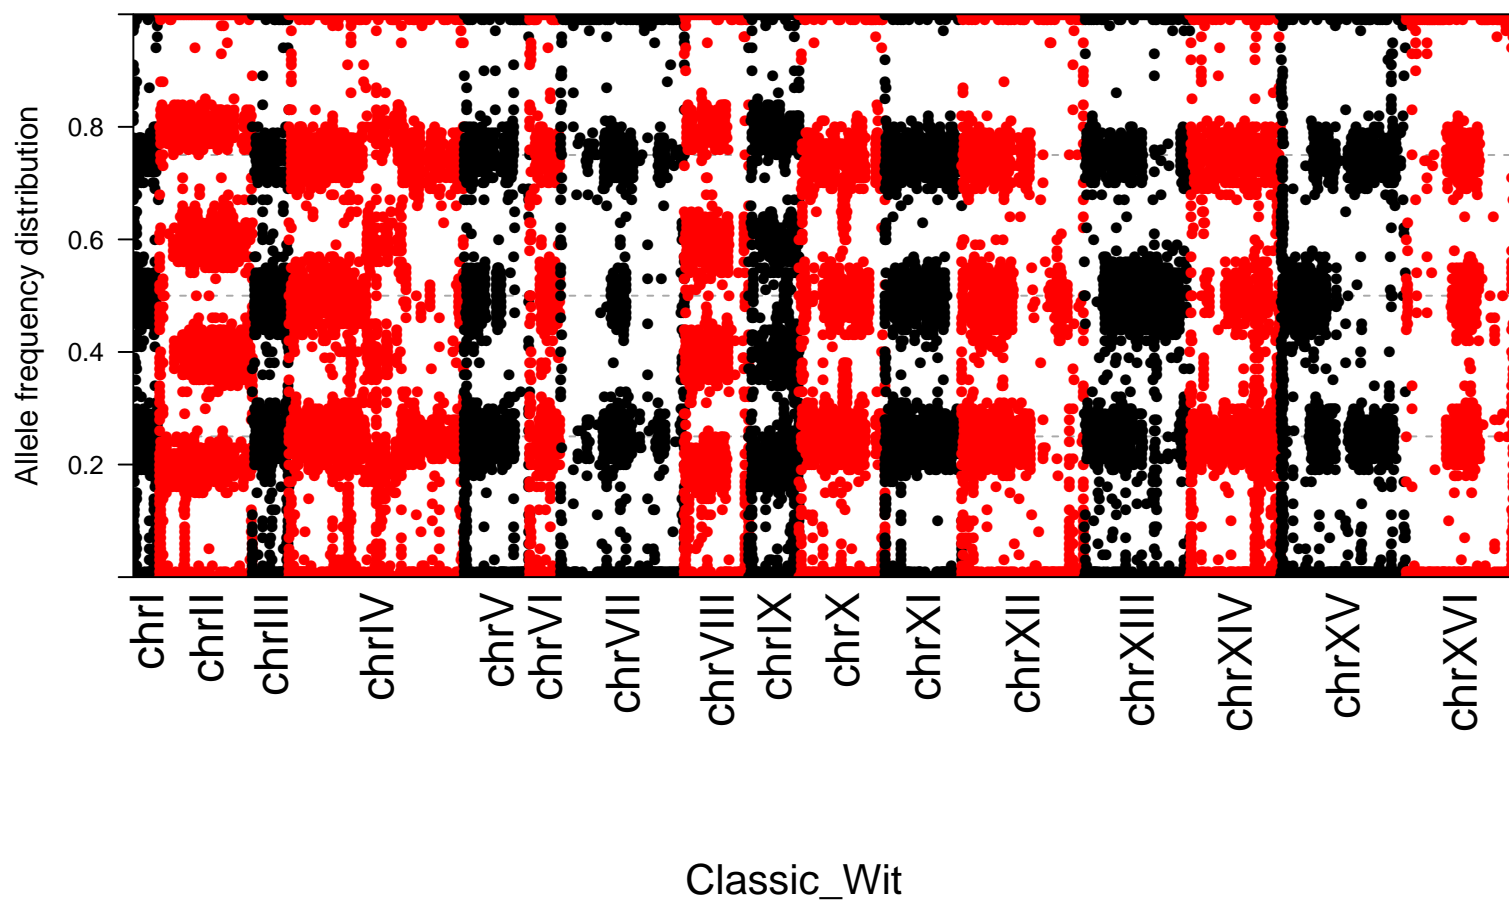

# Supplementary Figure S3

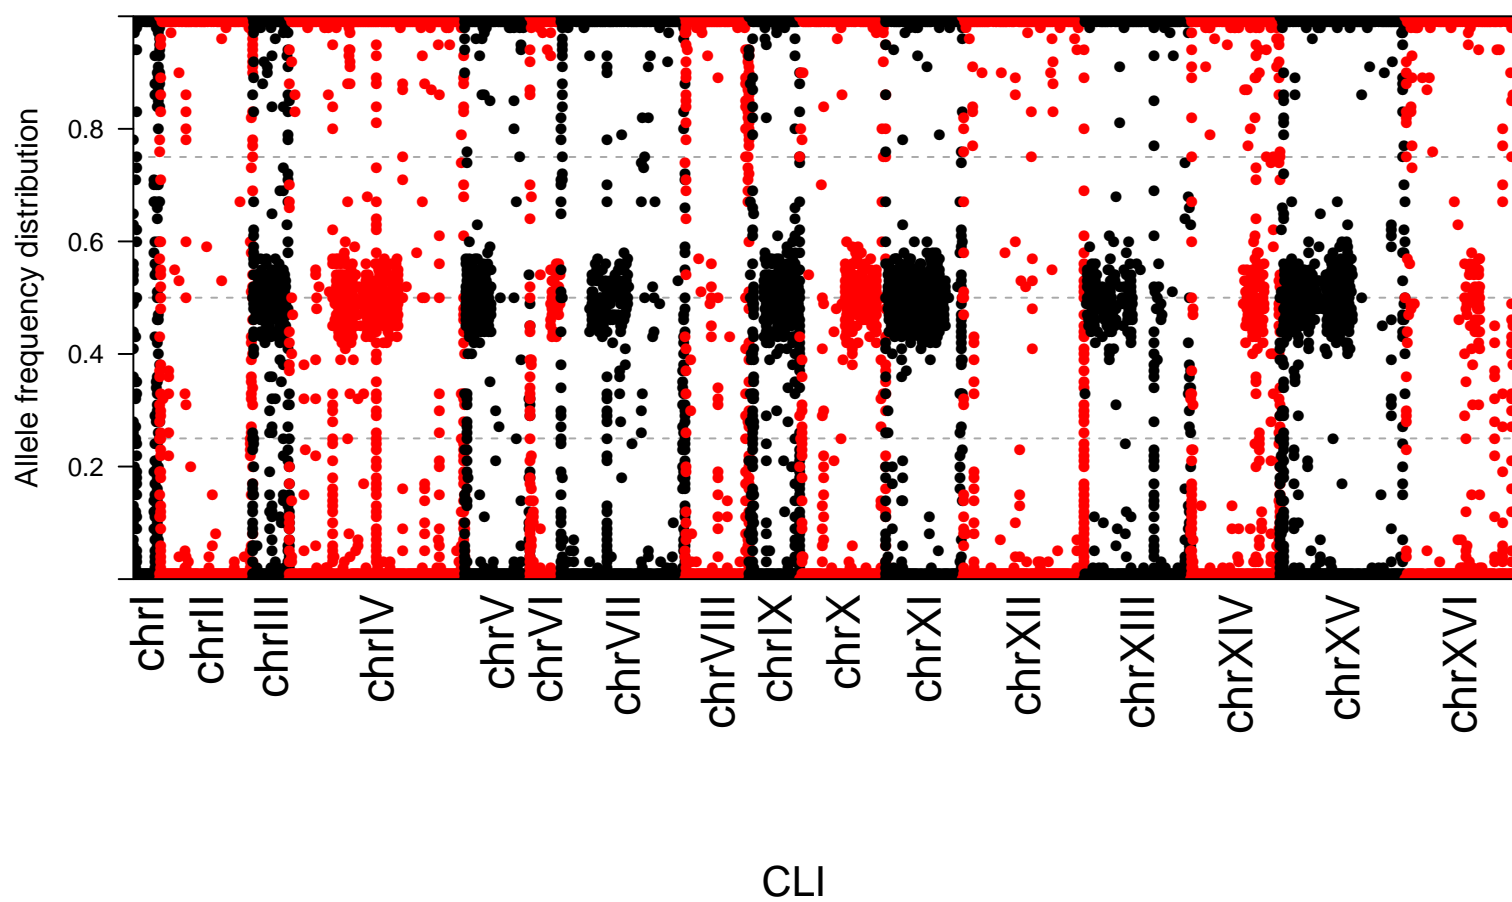

Supplementary Figure S3

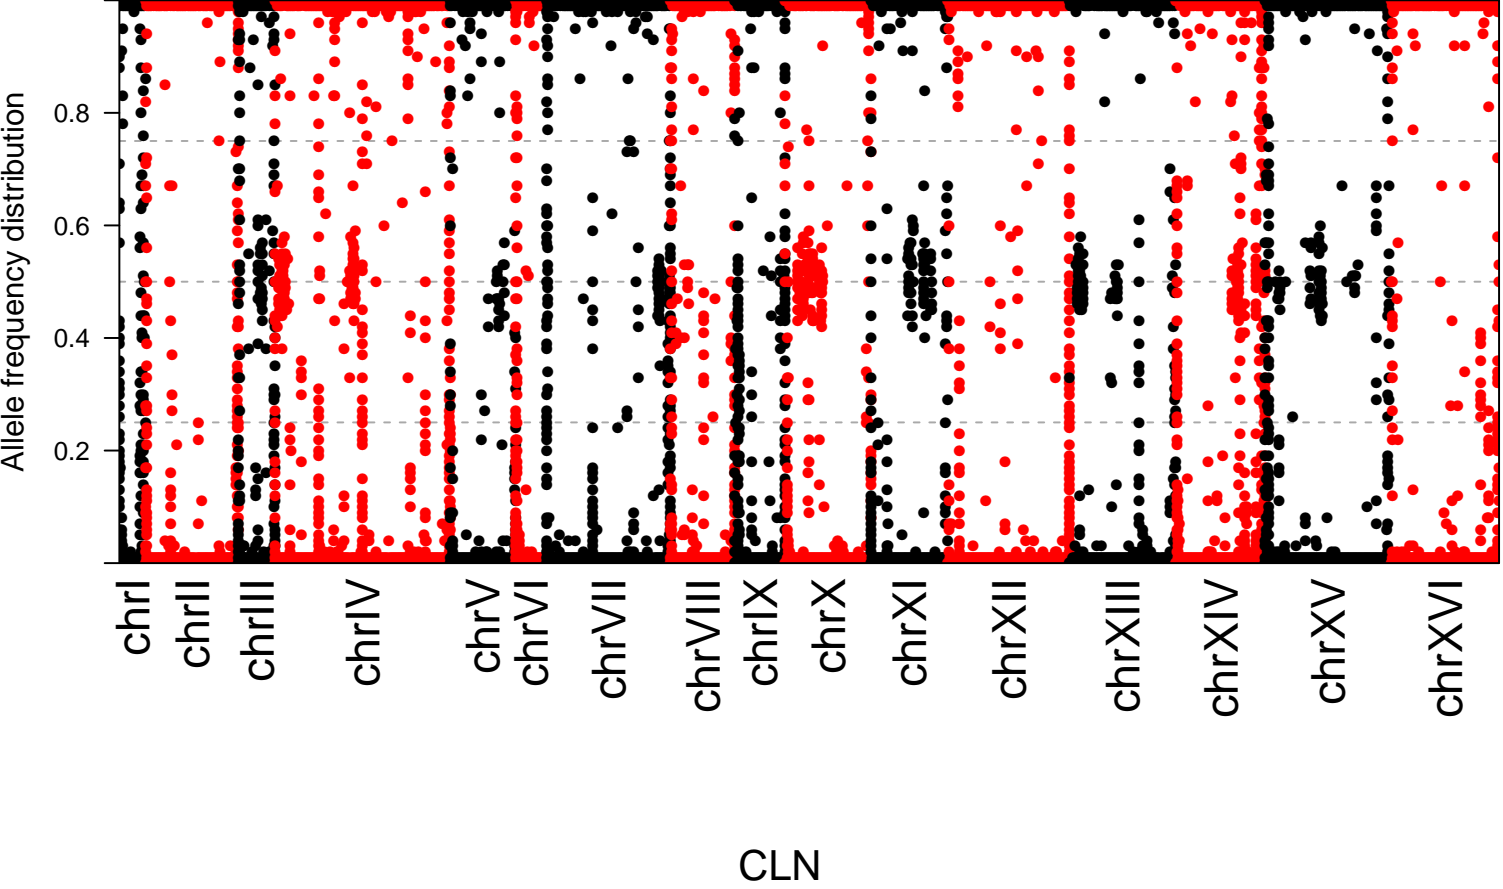

# Supplementary Figure S3

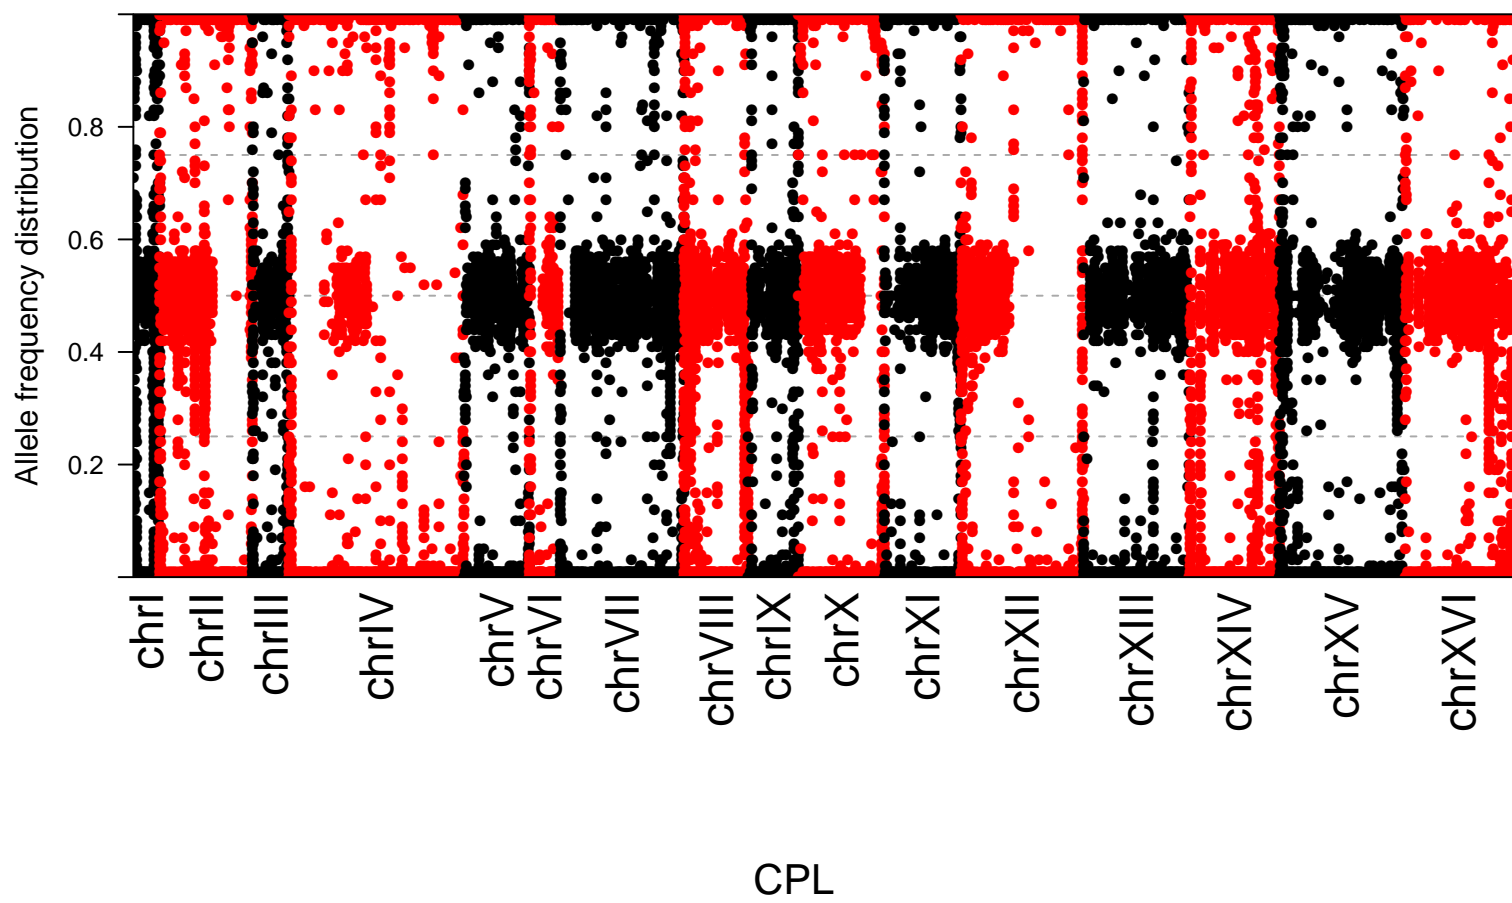

# Supplementary Figure S3

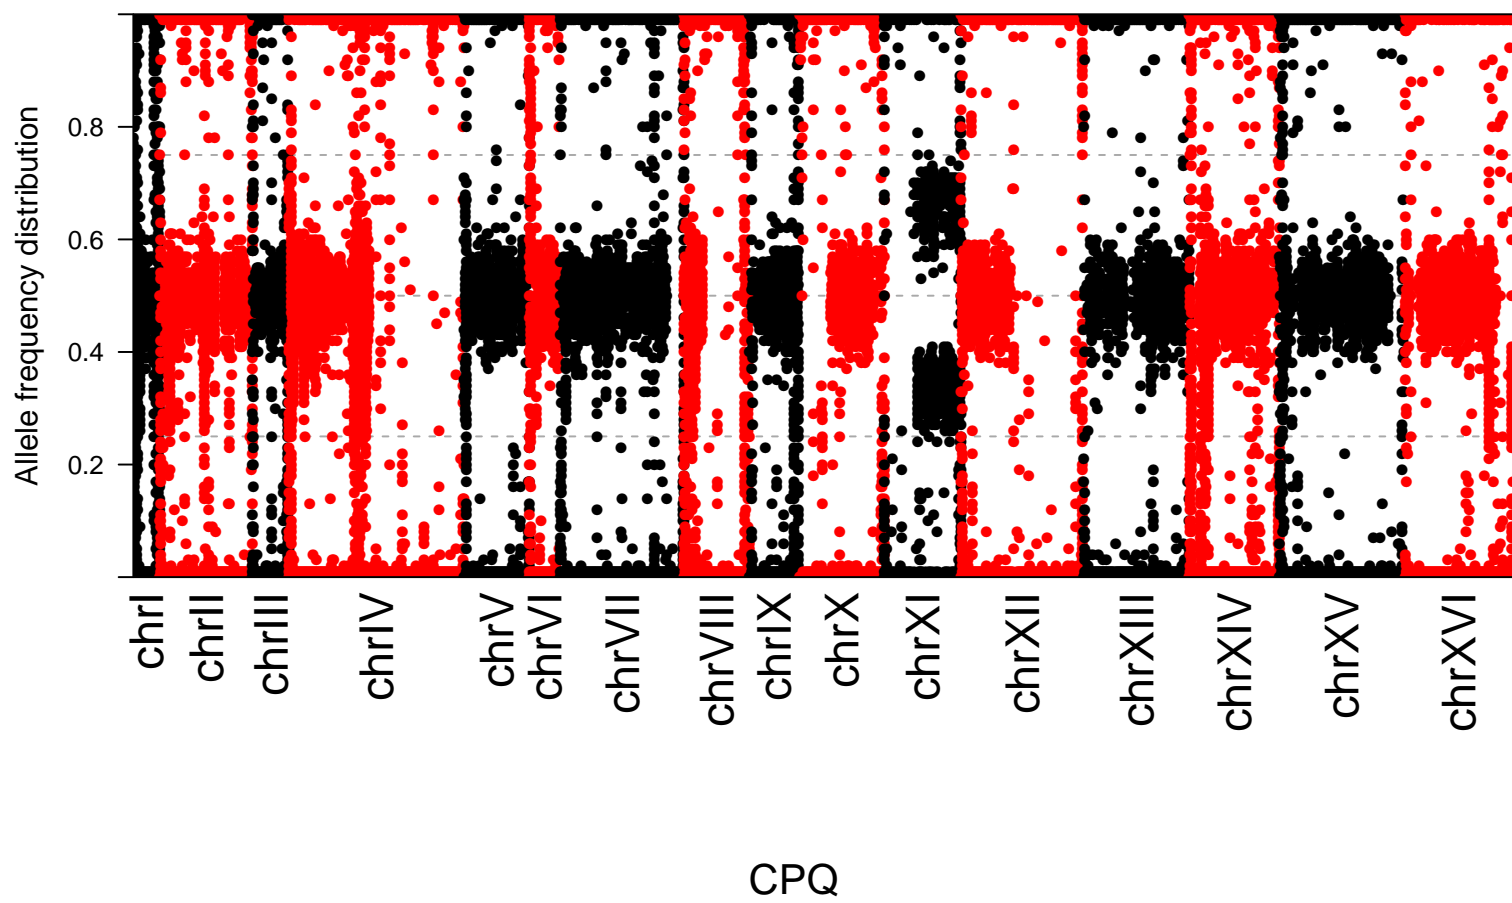

Supplementary Figure S3

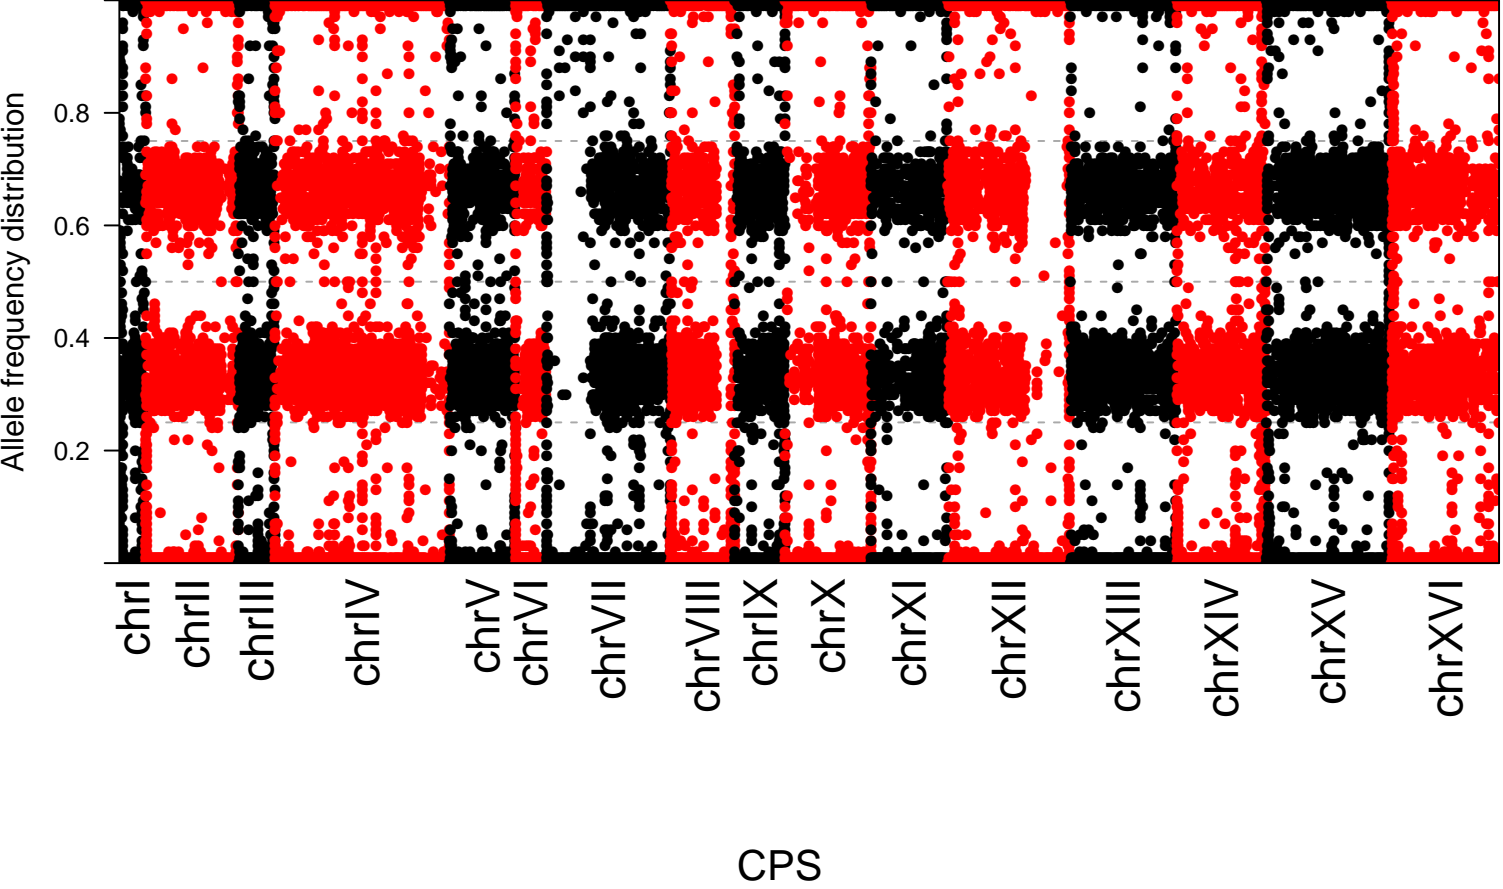

# Supplementary Figure S3

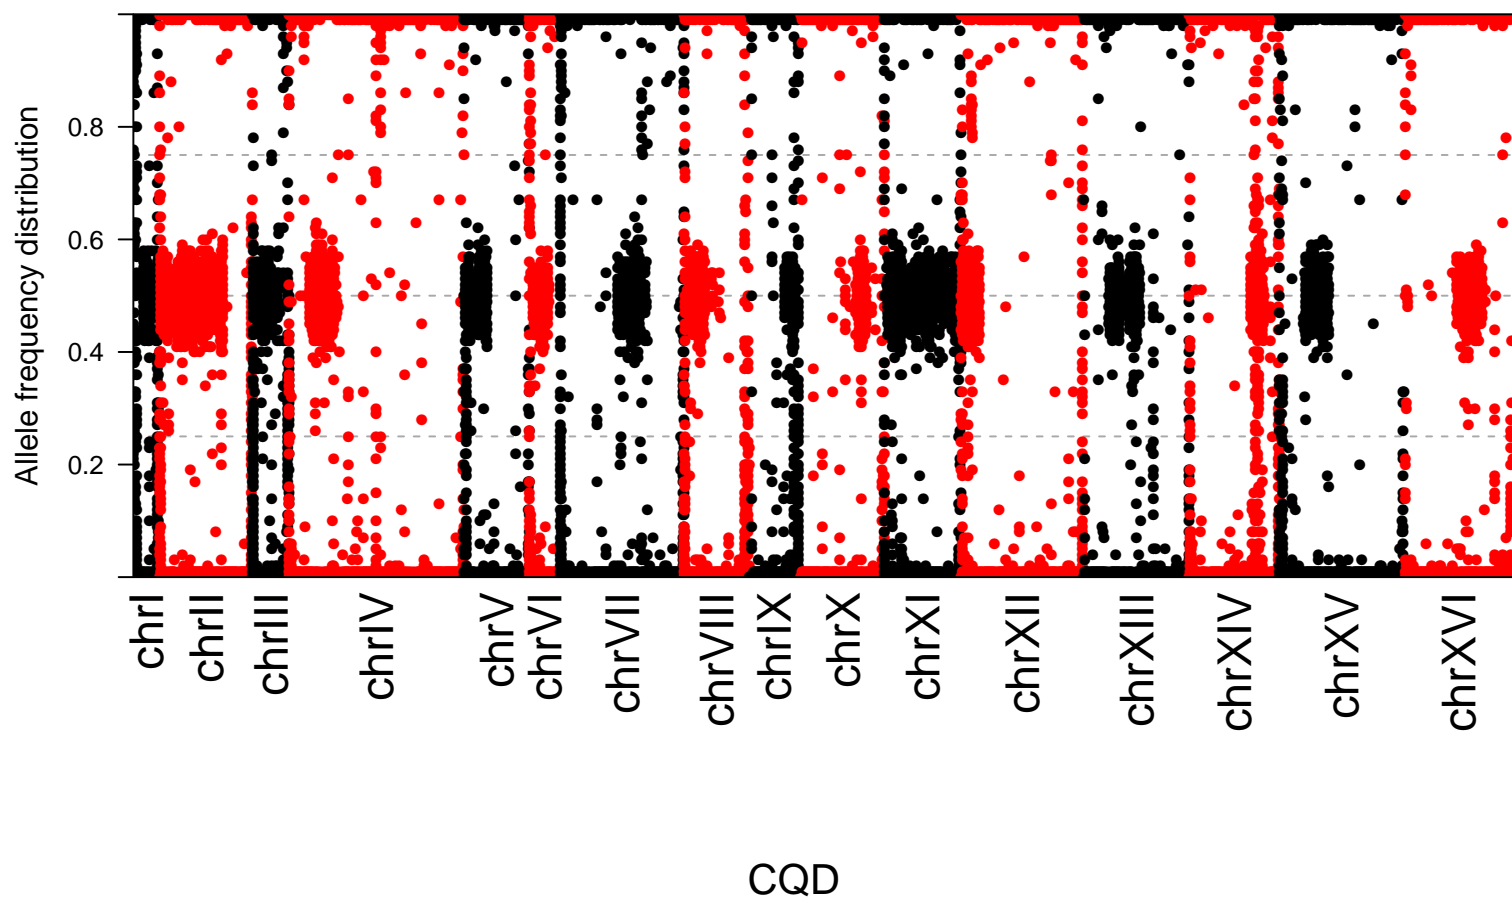



Supplementary Figure S3

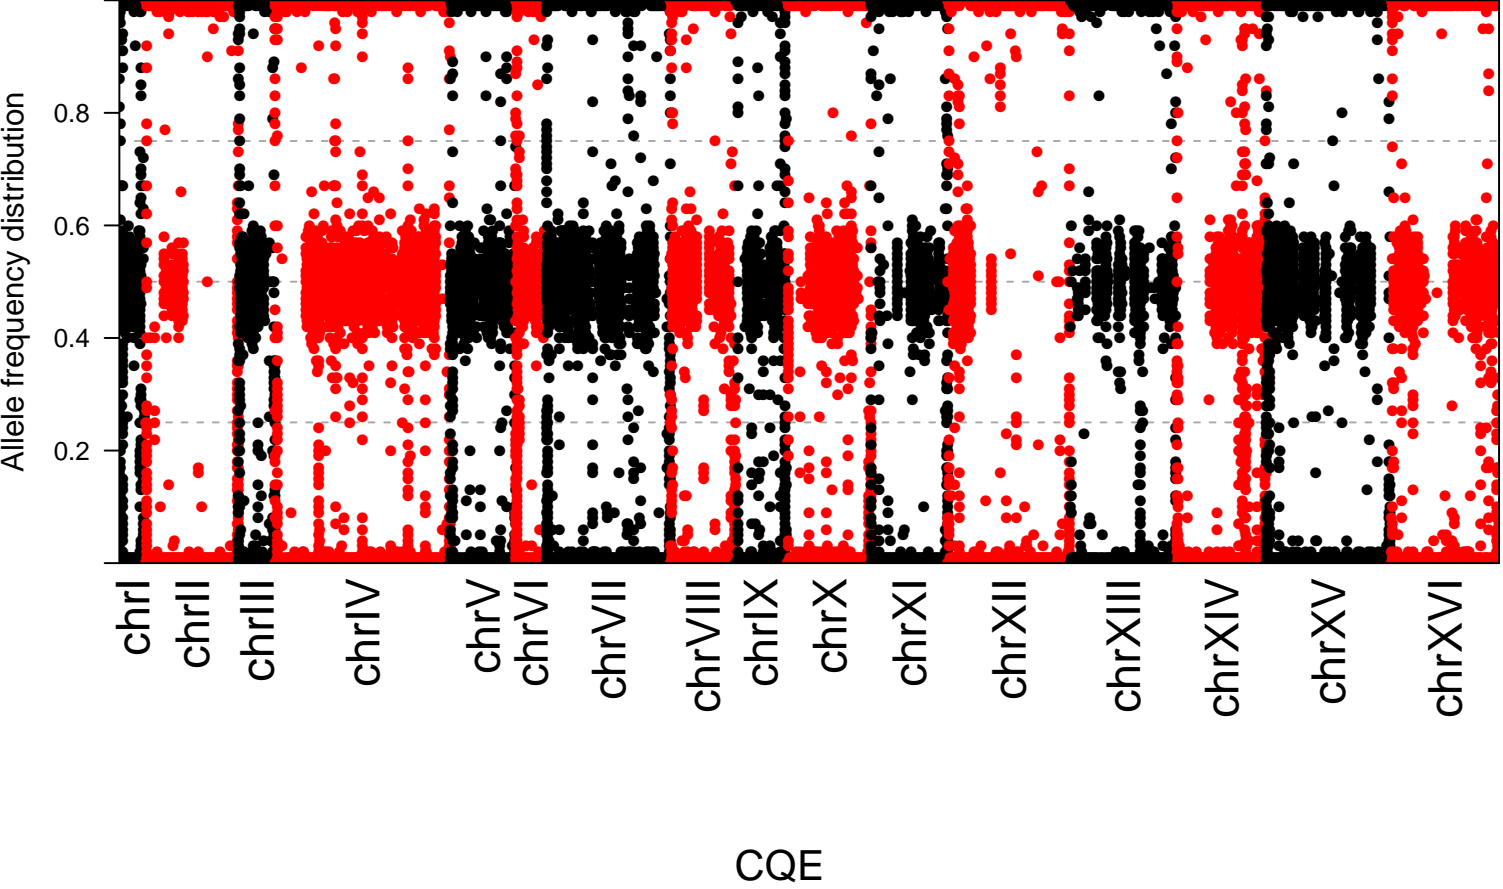

# Supplementary Figure S3

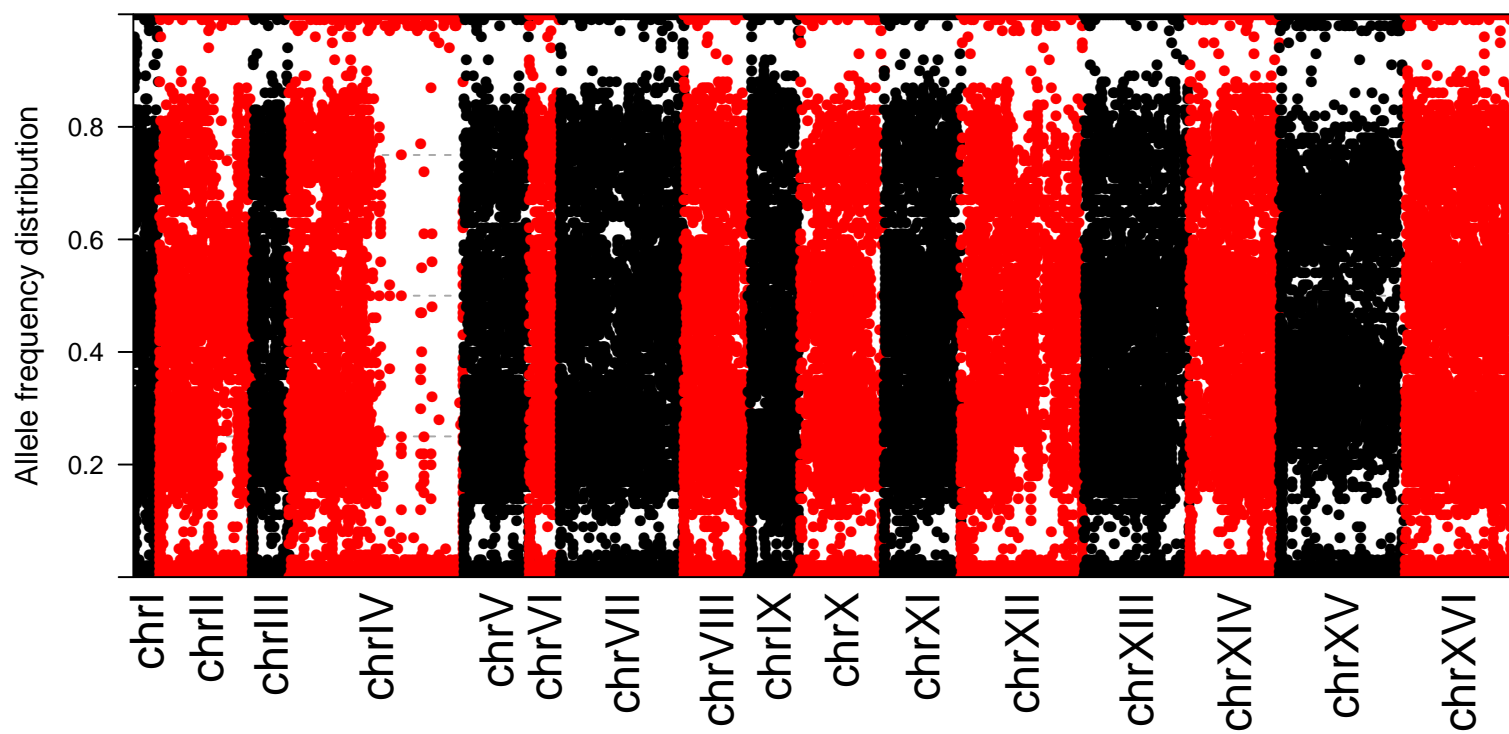

Djonno1

# Supplementary Figure S3

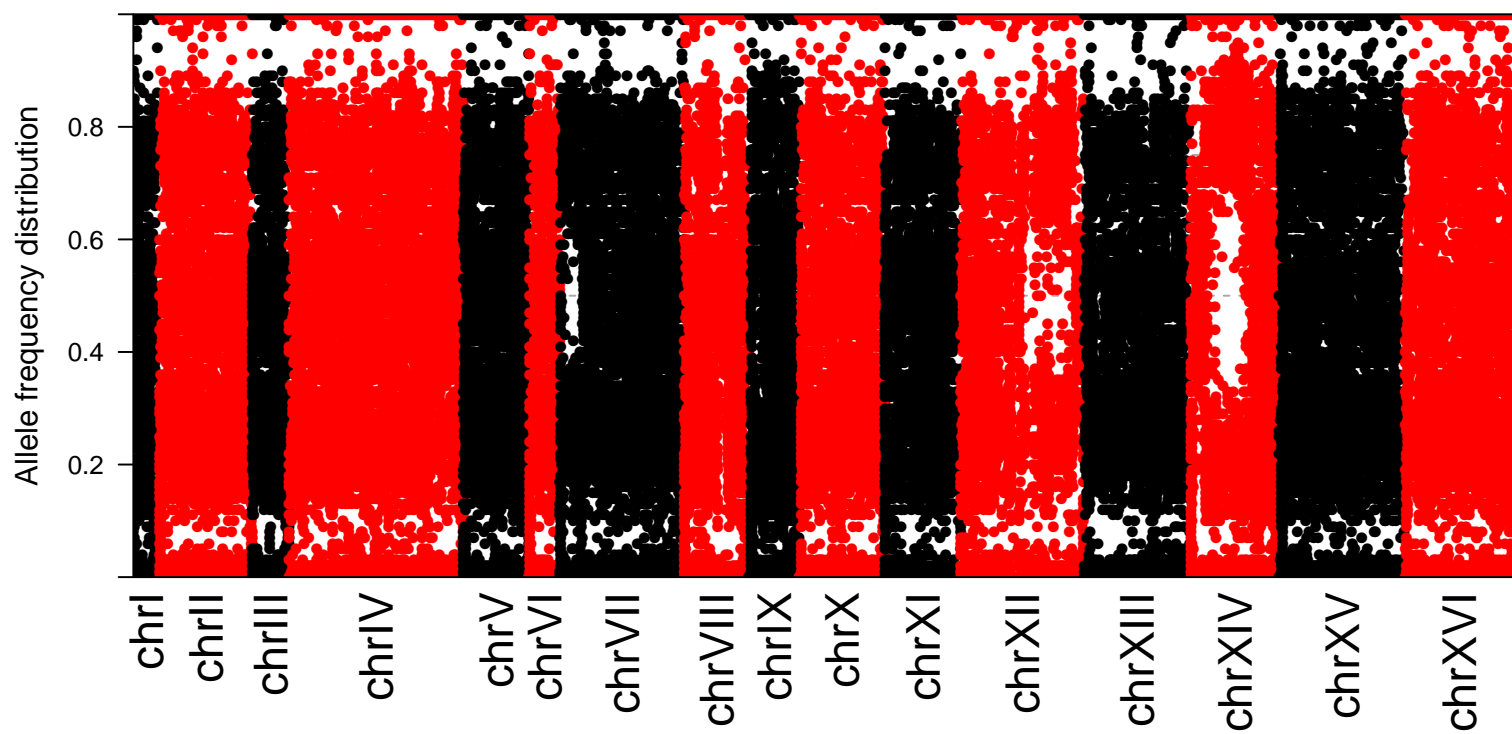

Dras\_1

# Supplementary Figure S3

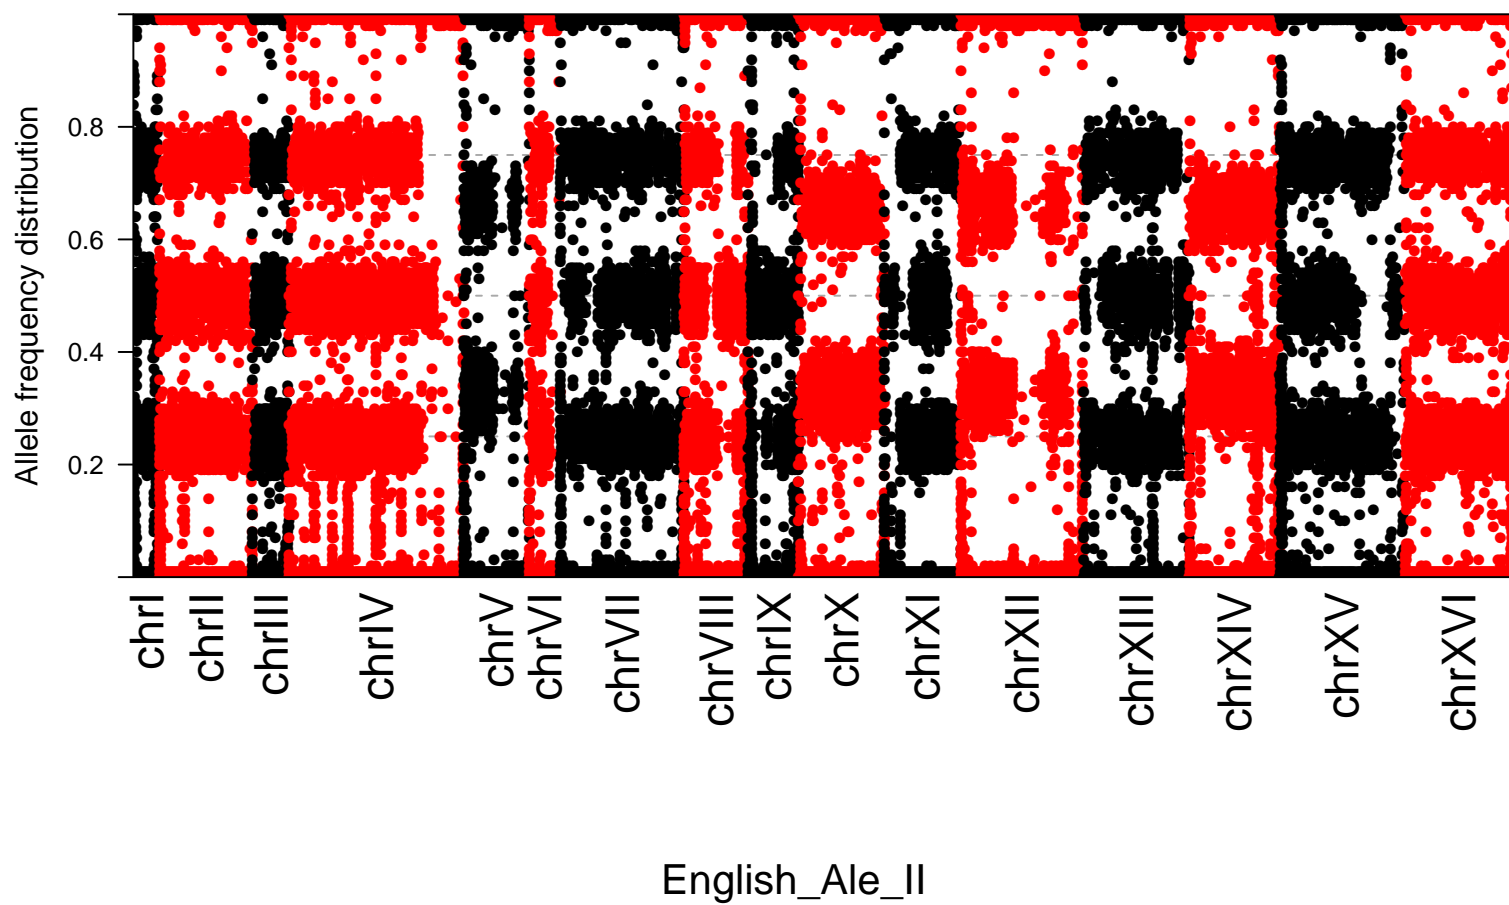

# Supplementary Figure S3

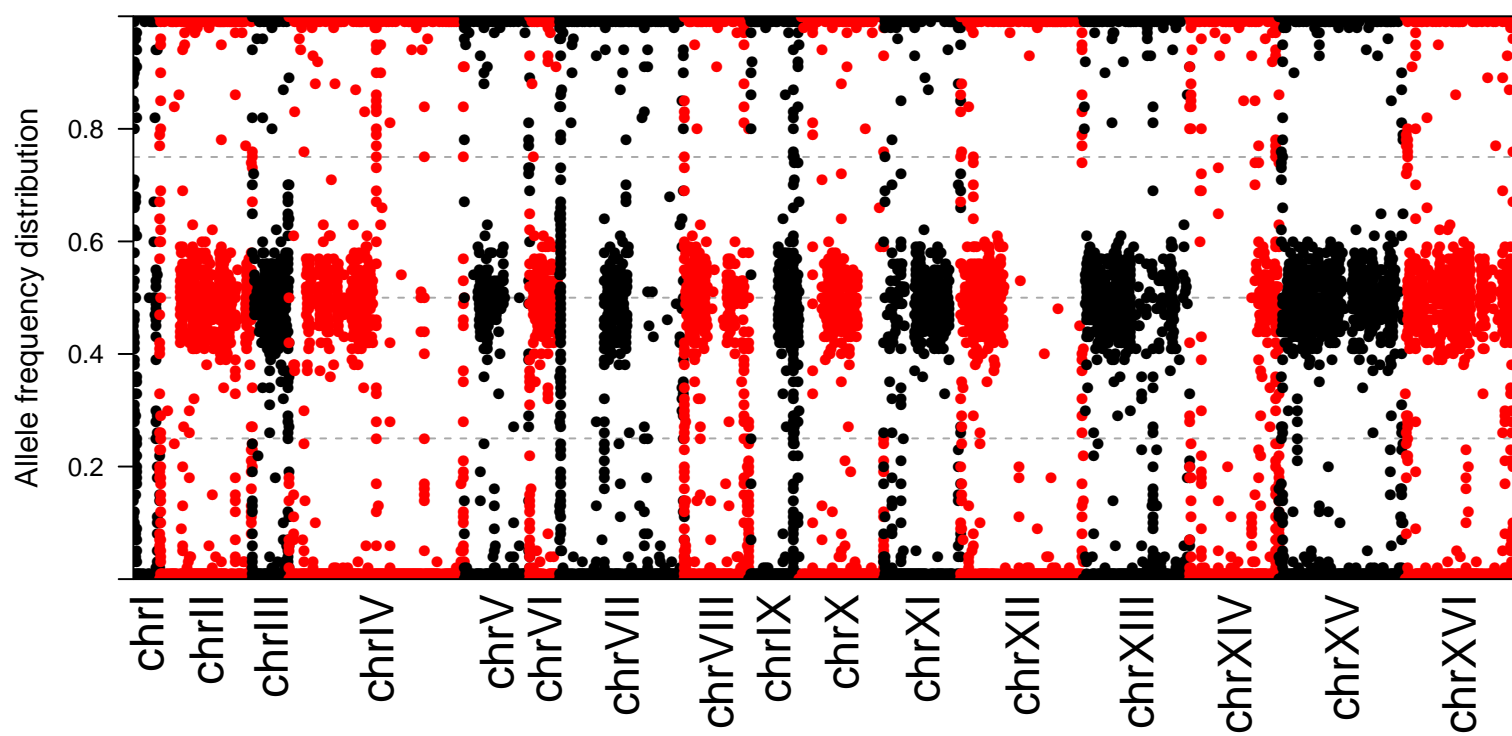

GH1

# Supplementary Figure S3

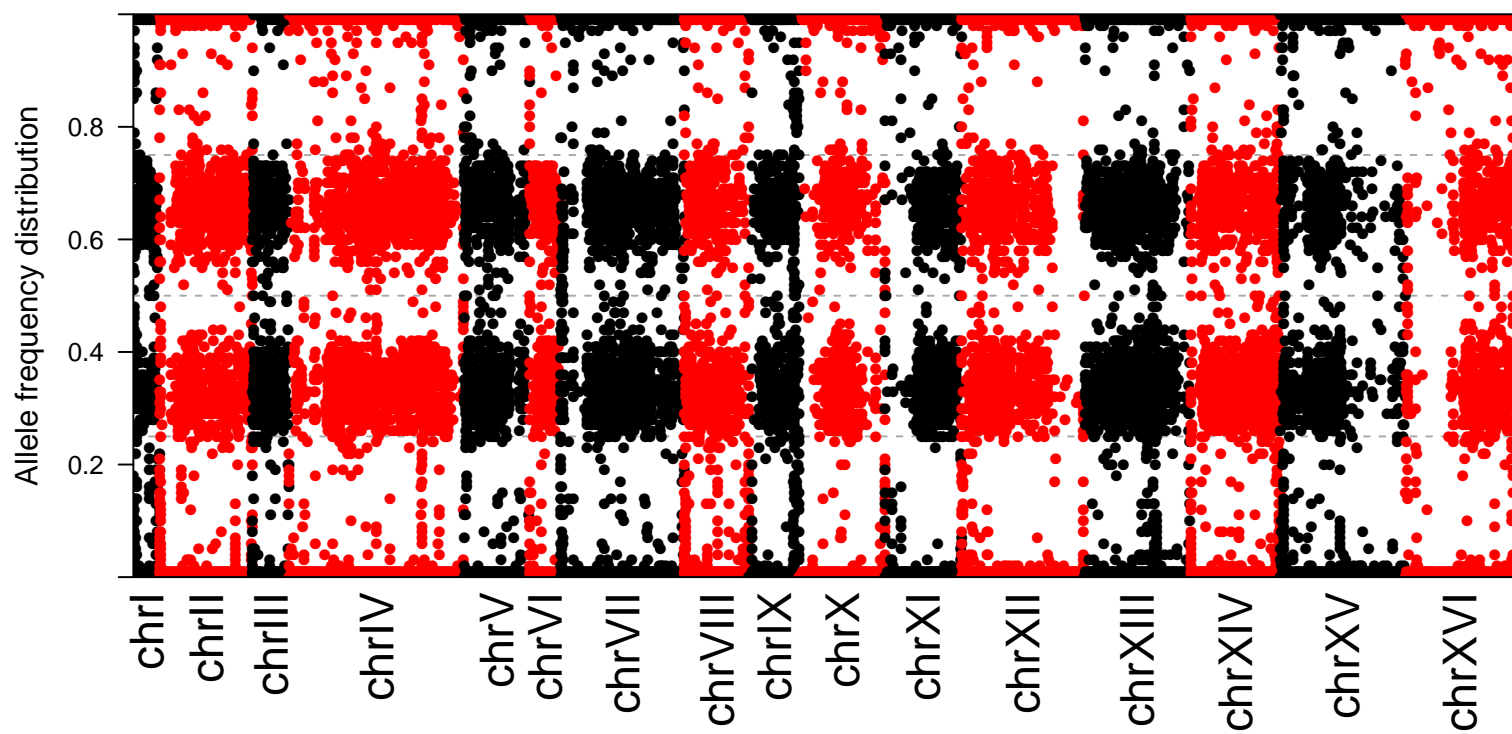

GH2

# Supplementary Figure S3

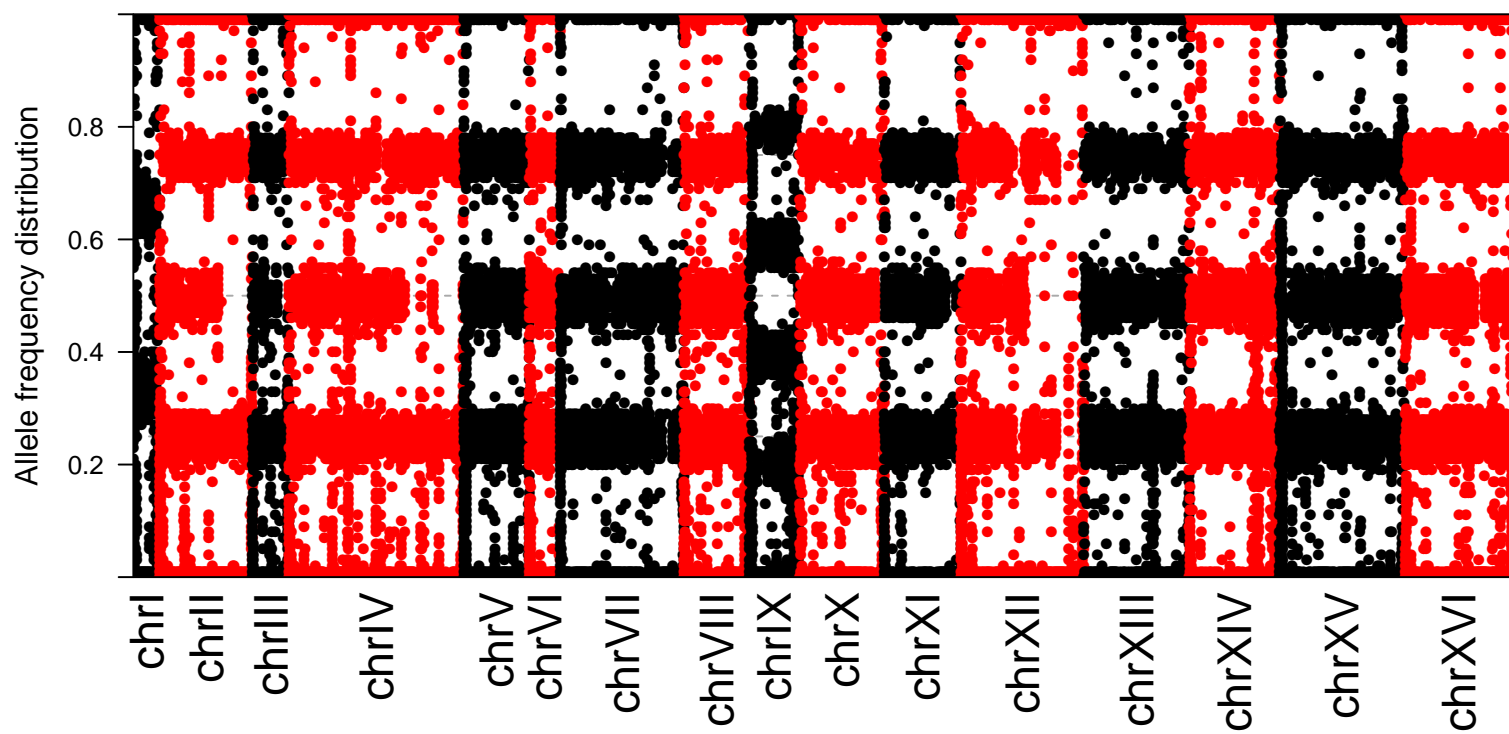

Granvin\_1

Supplementary Figure S3

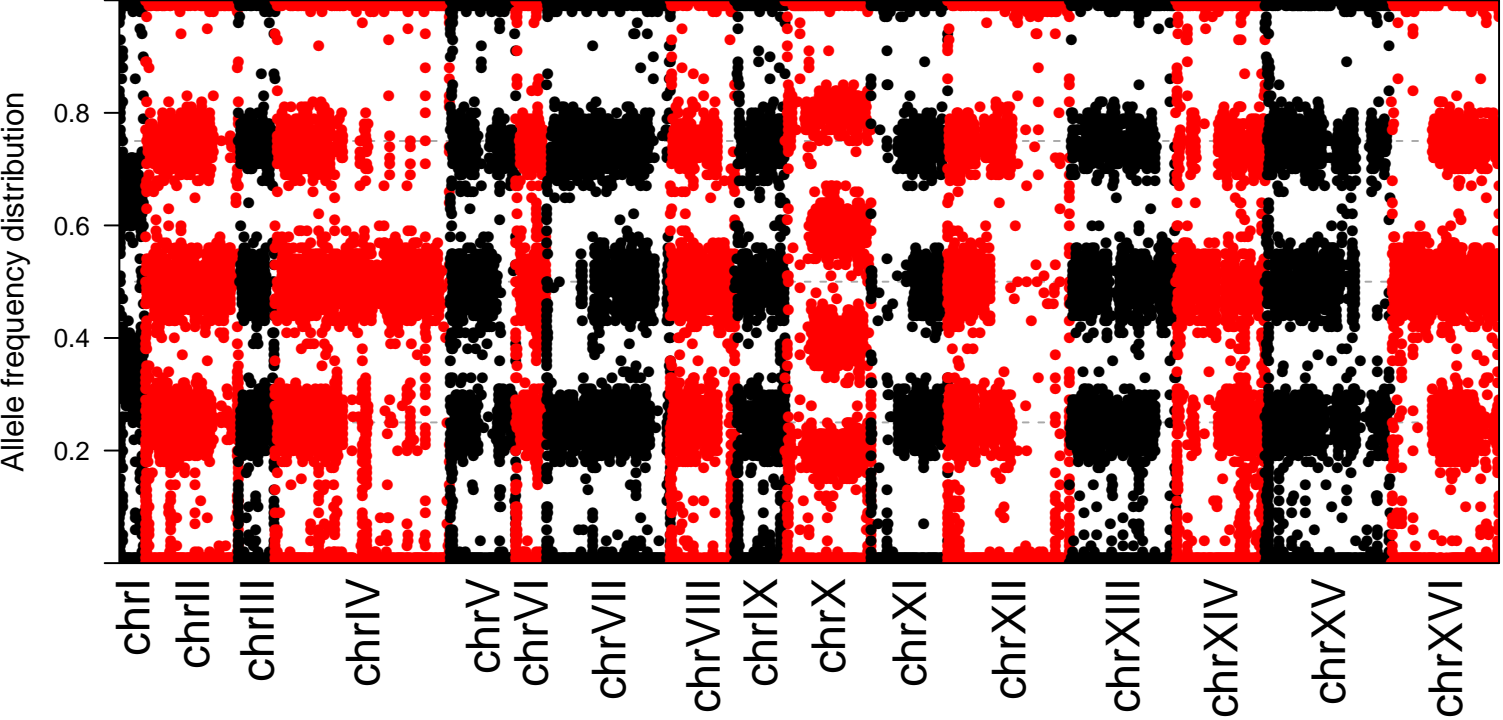

Halvorsgard\_3



Supplementary Figure S3

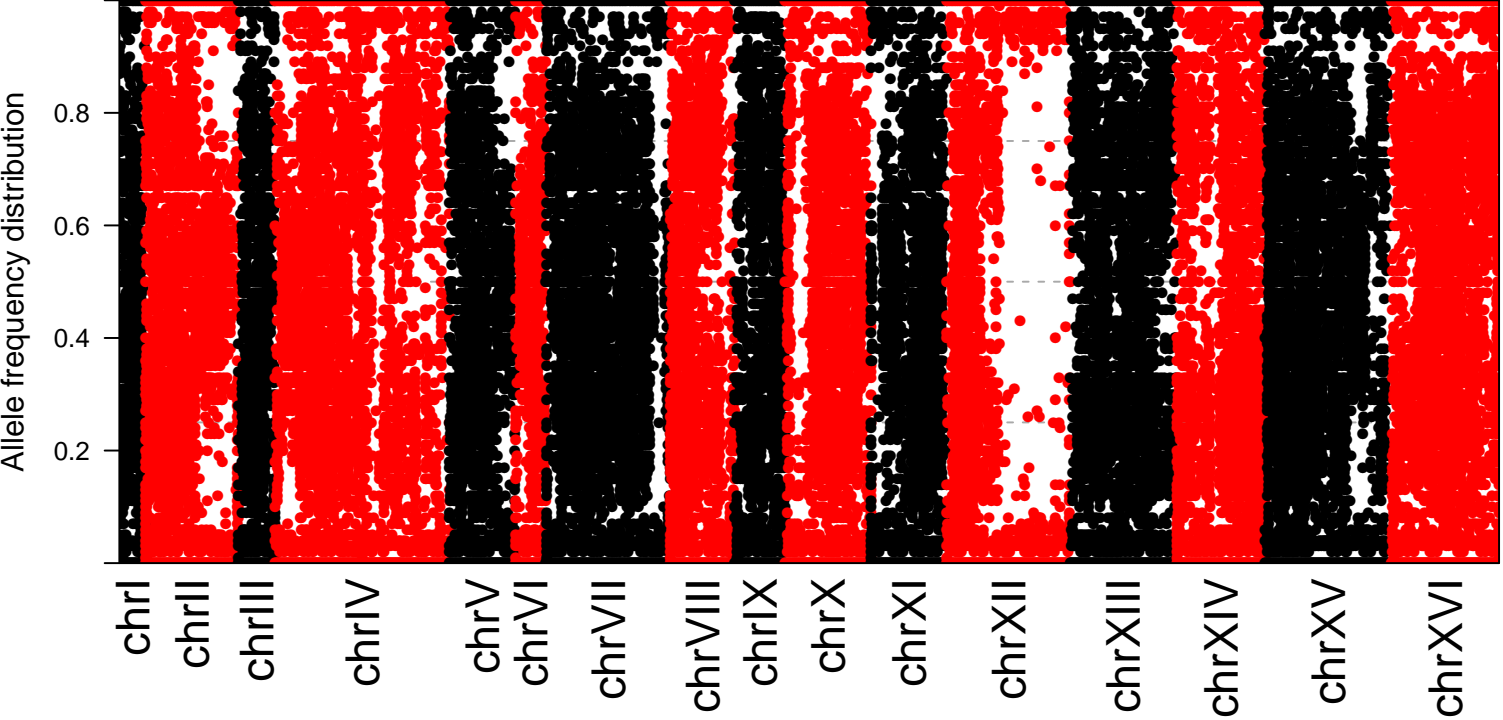

Halvorsgard\_6

# Supplementary Figure S3

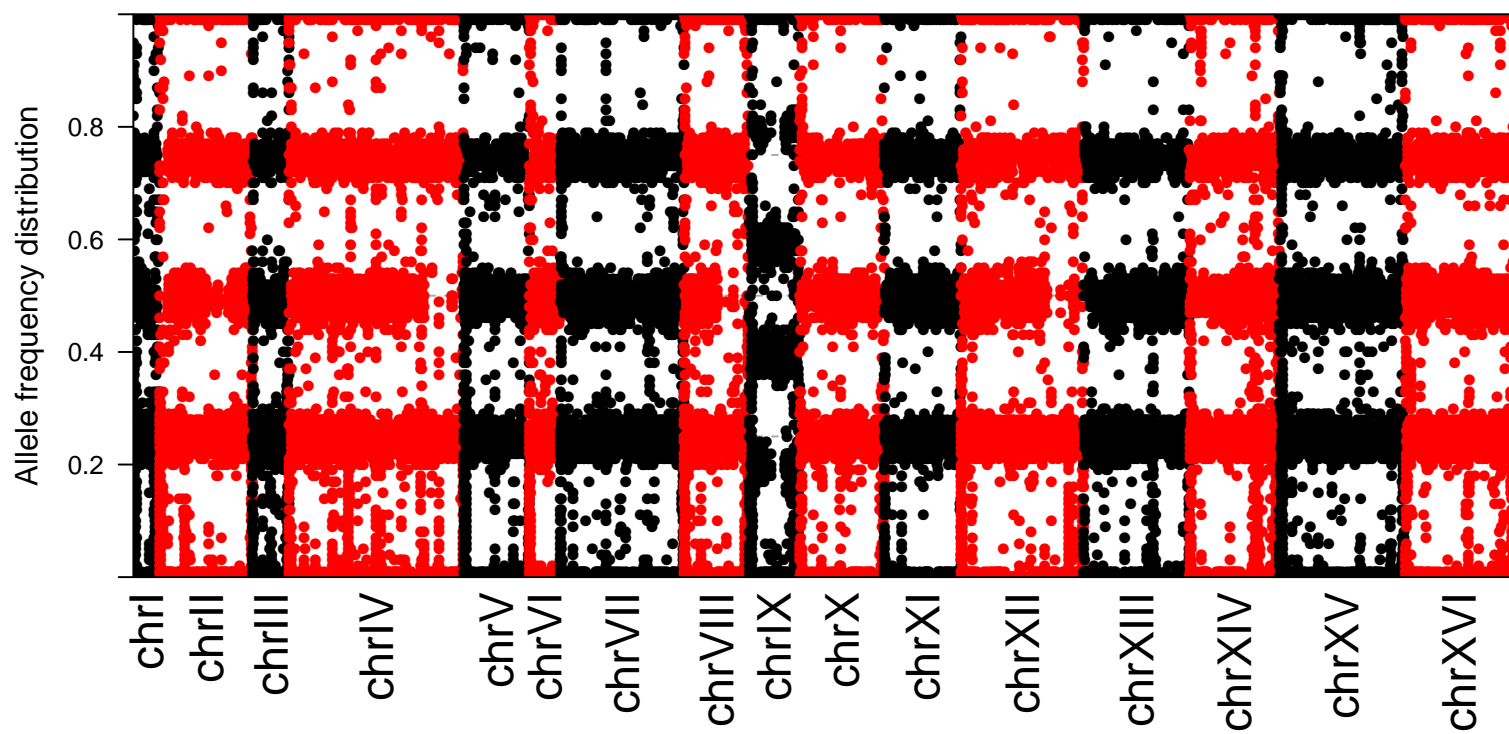

Hornindal\_1

# Supplementary Figure S3

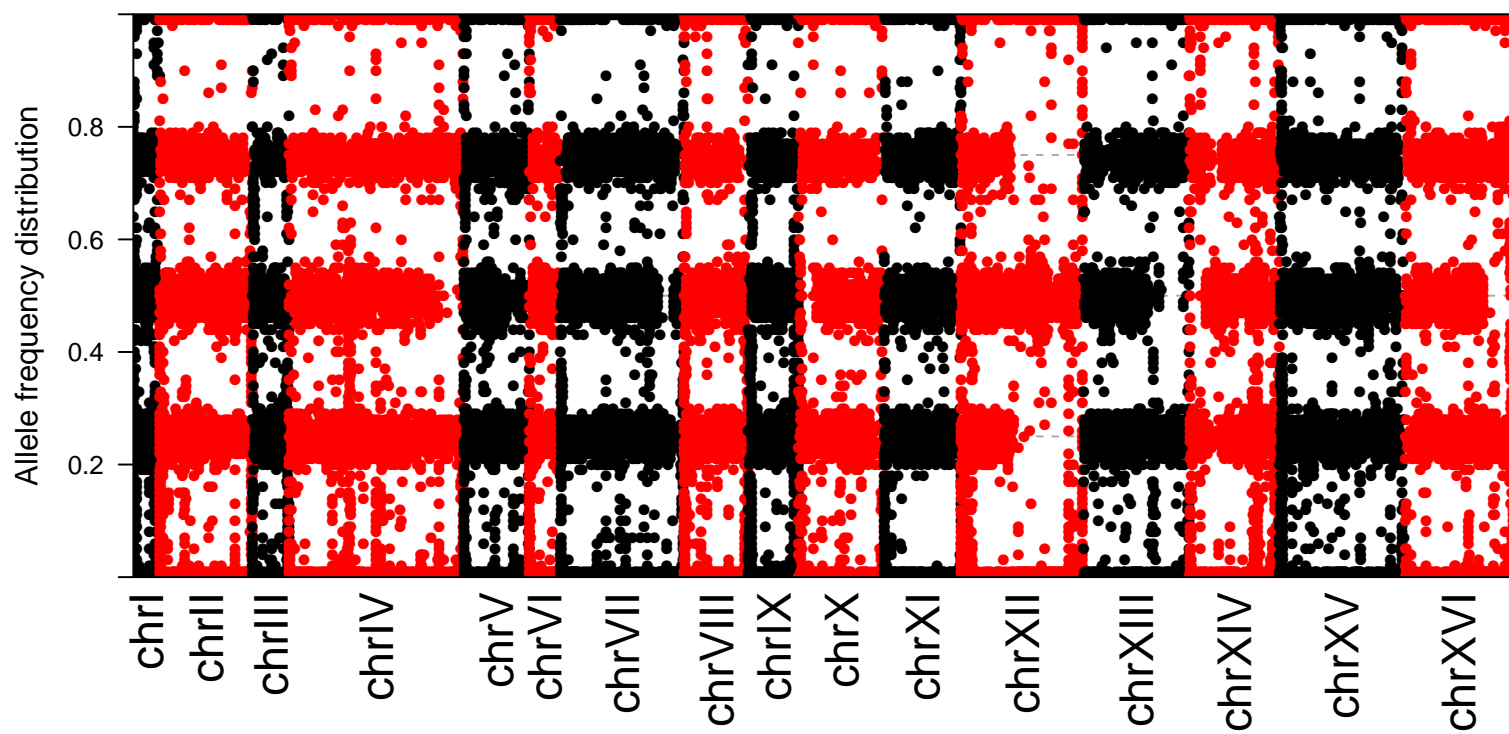

Hornindal\_2

Supplementary Figure S3

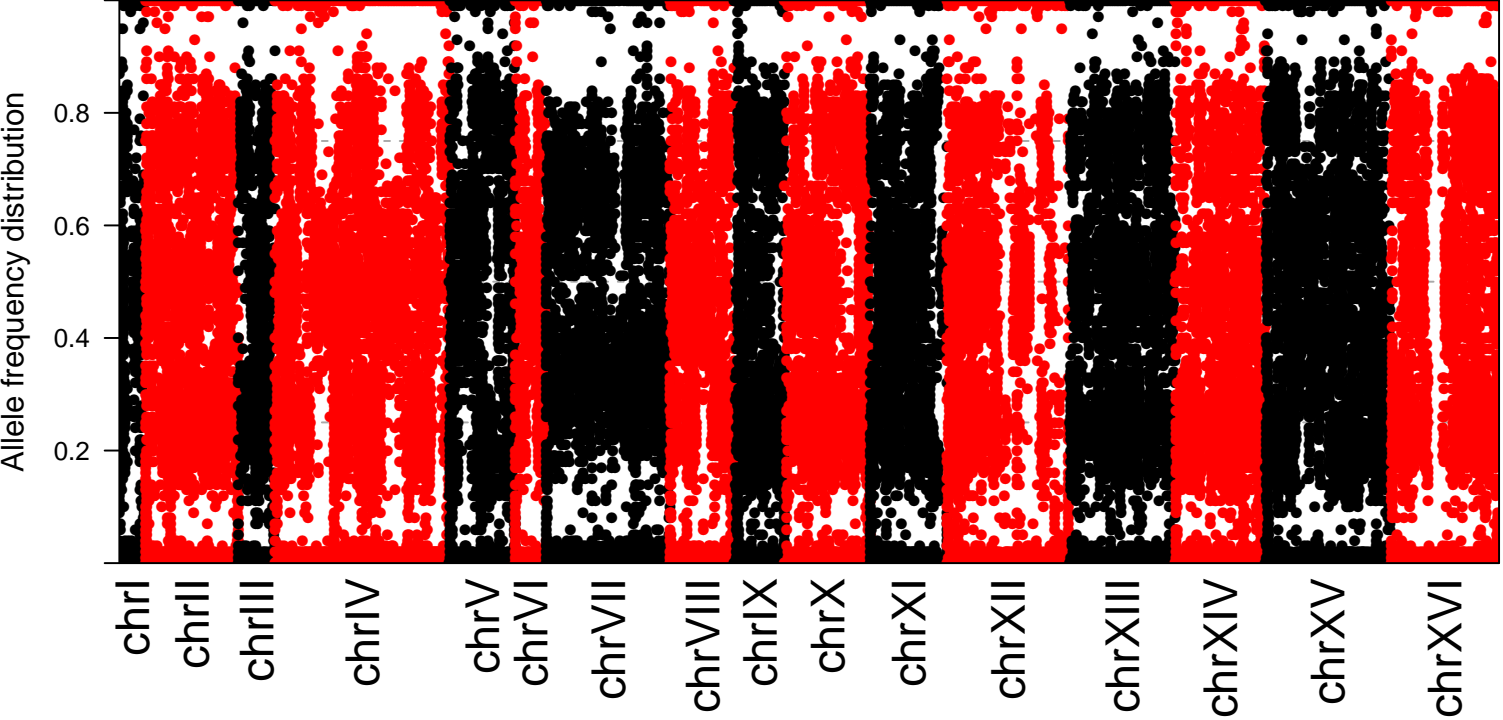

Ishlei1

# Supplementary Figure S3

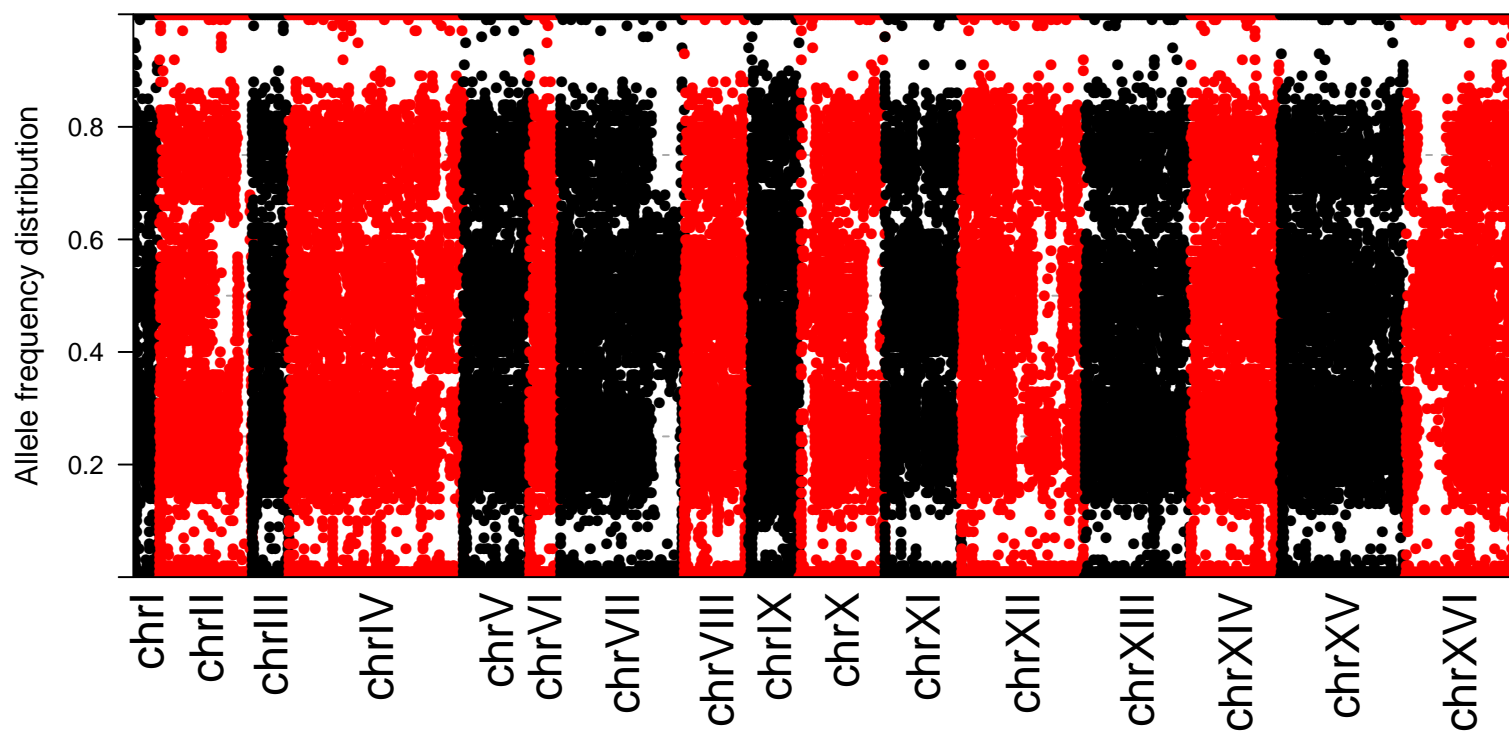

Ivar\_Geithung\_1

# Supplementary Figure S3

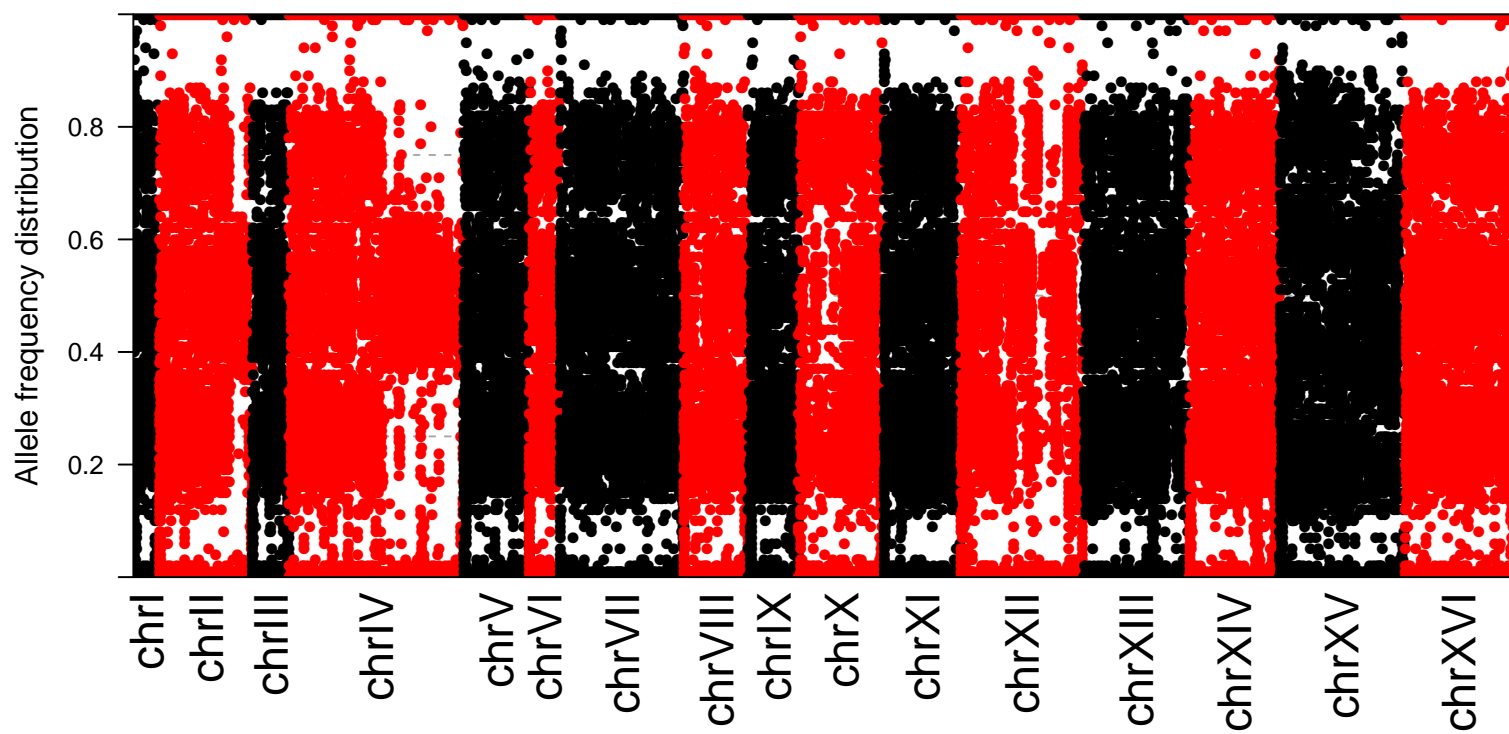

Ivar\_Geithung\_2

# Supplementary Figure S3

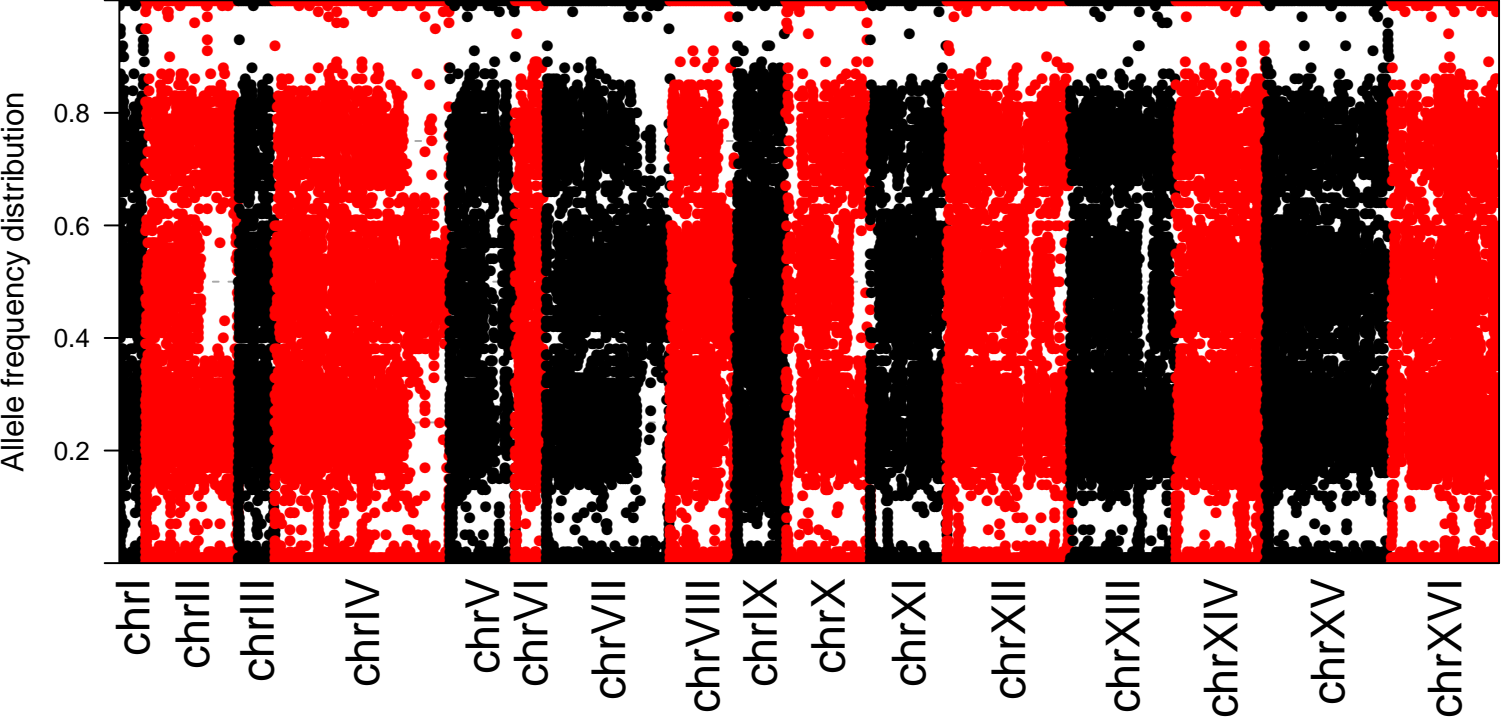

Ivar\_Geithung\_3

# Supplementary Figure S3

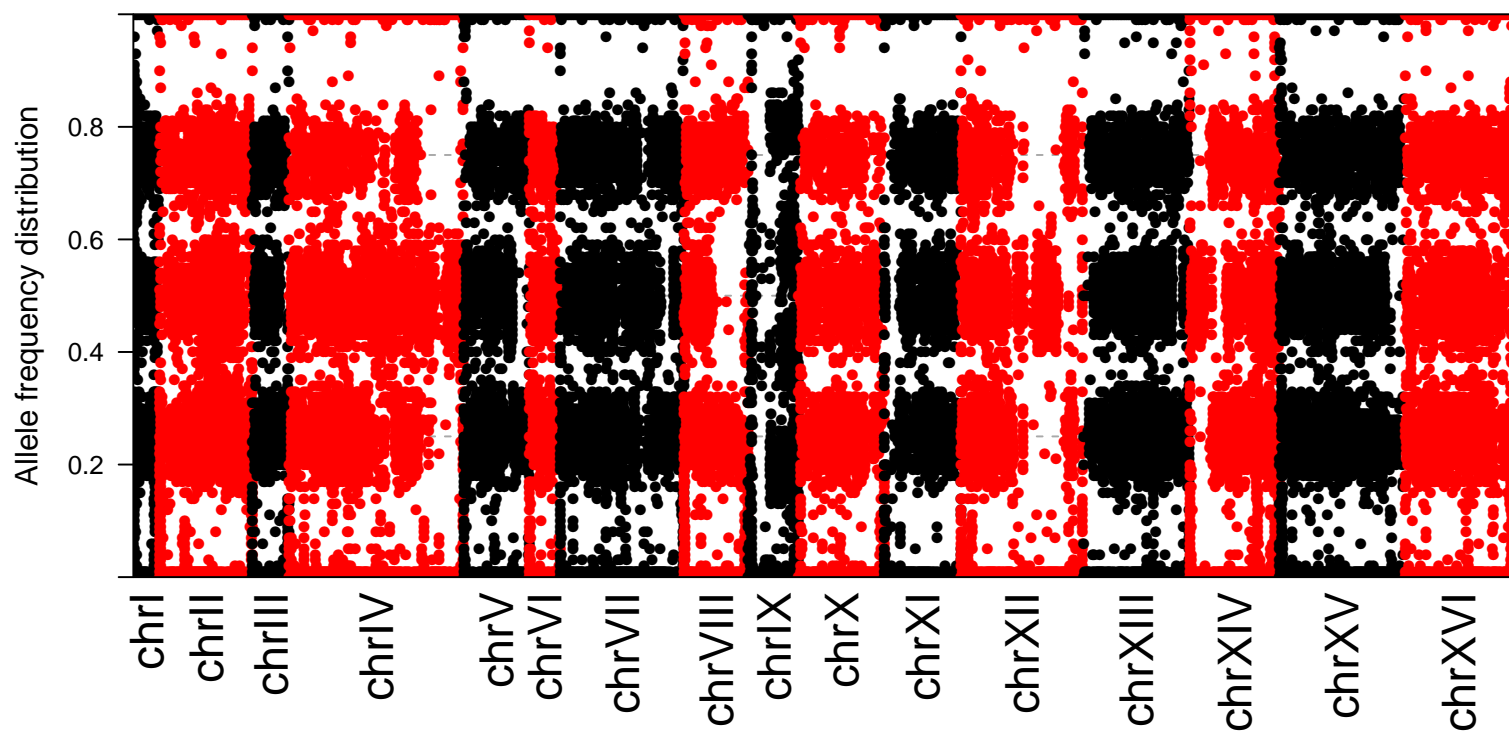

Jordal1



# Supplementary Figure S3

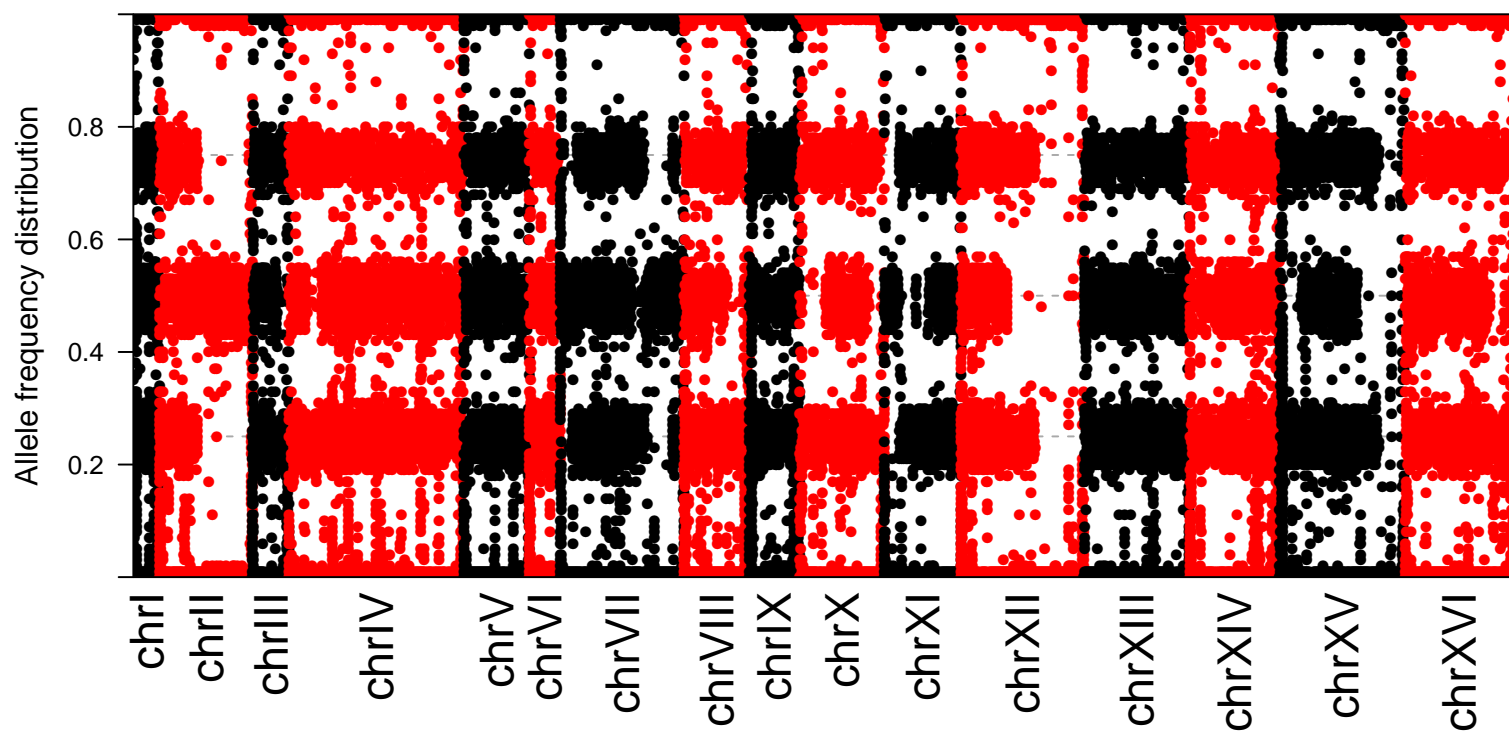

Laerdal\_2

# Supplementary Figure S3

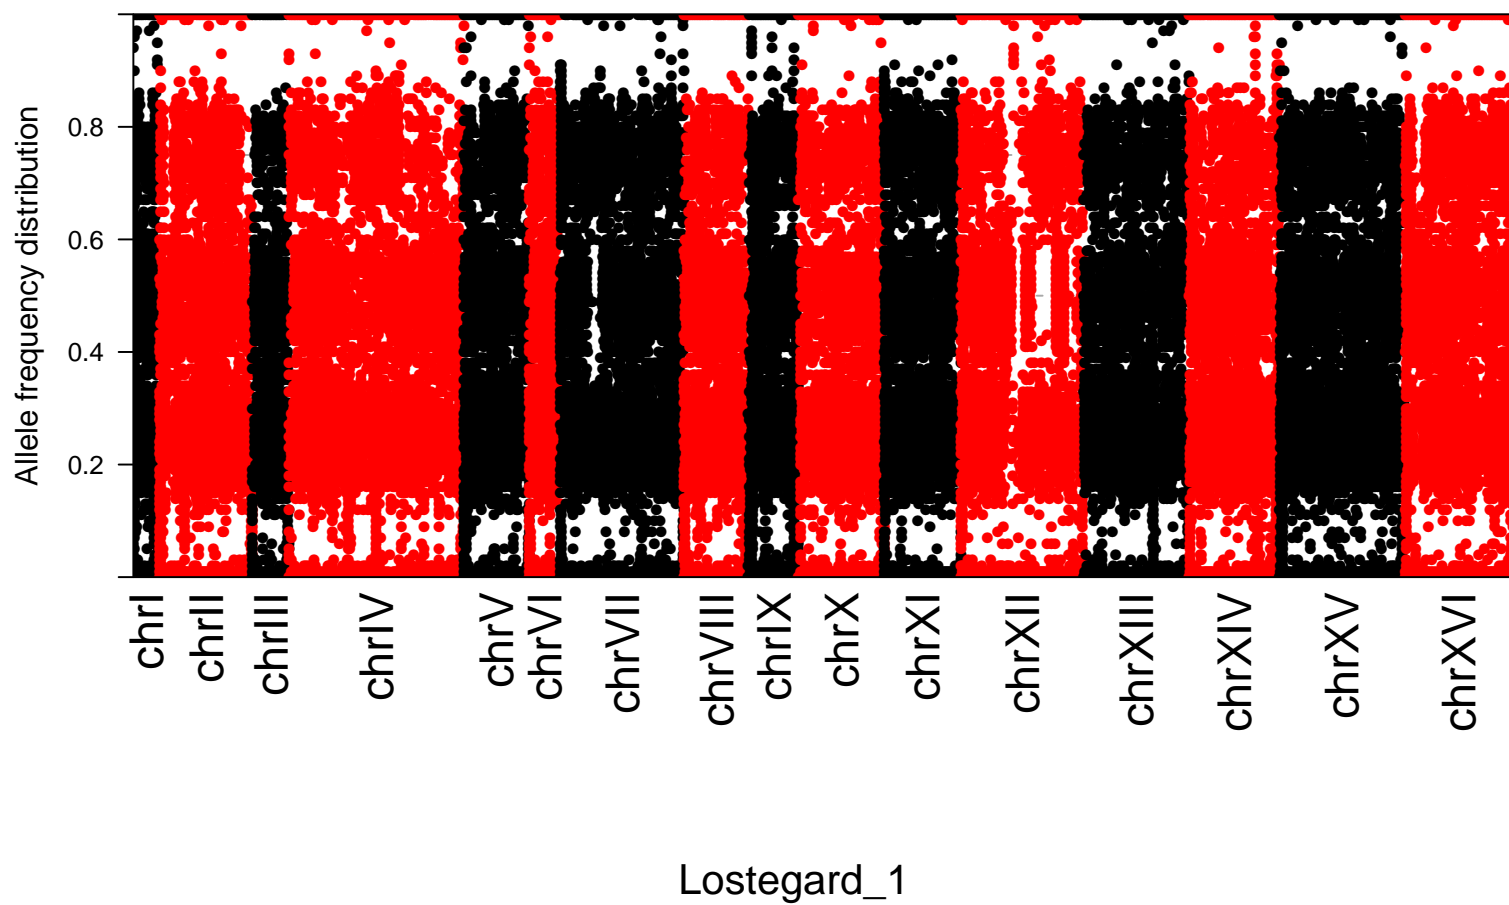

Supplementary Figure S3

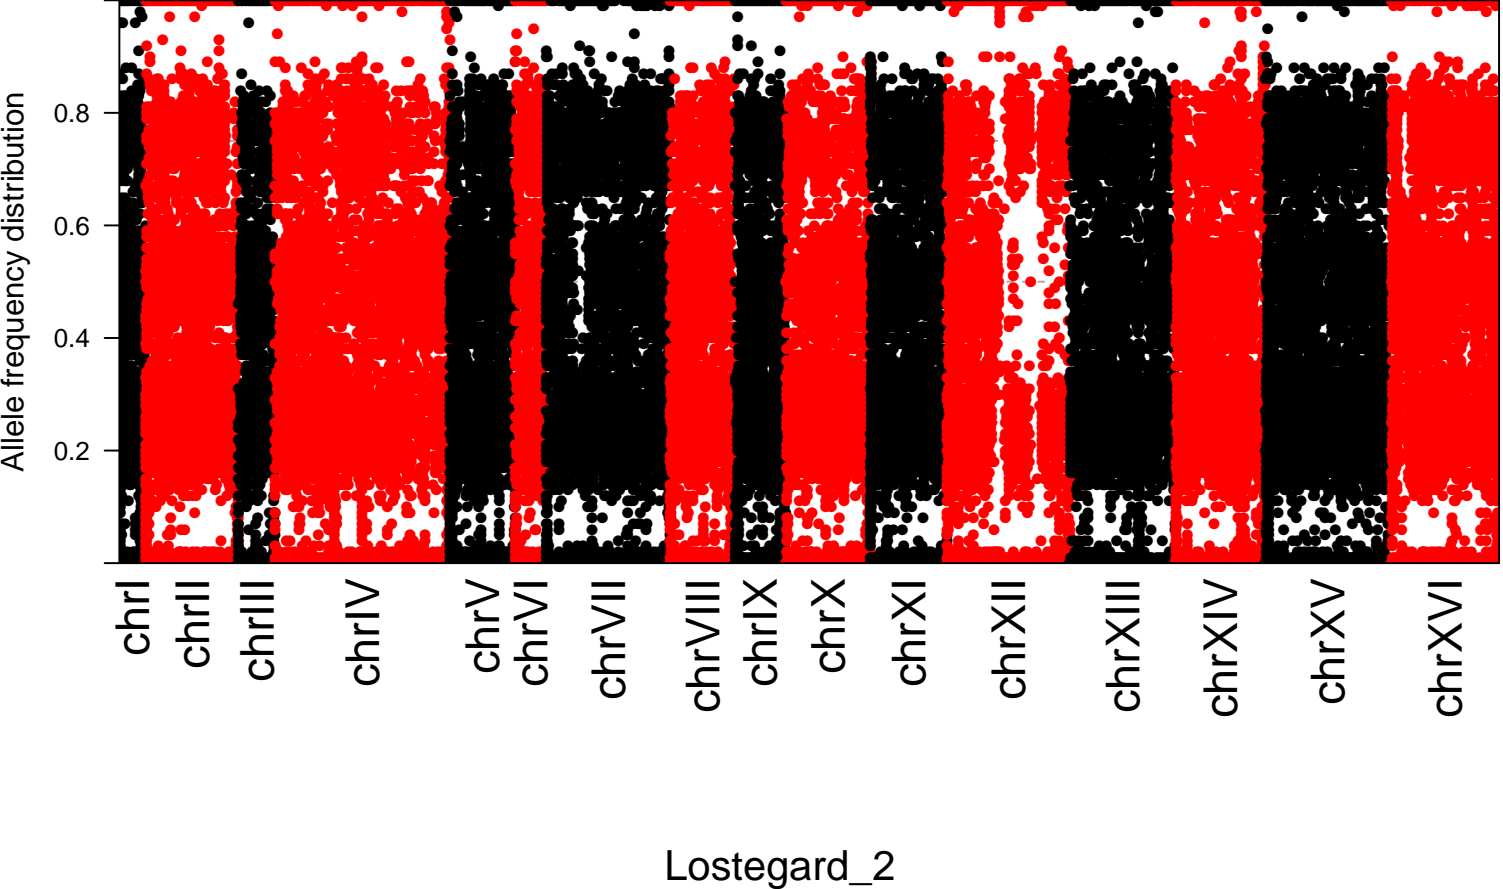

Supplementary Figure S3

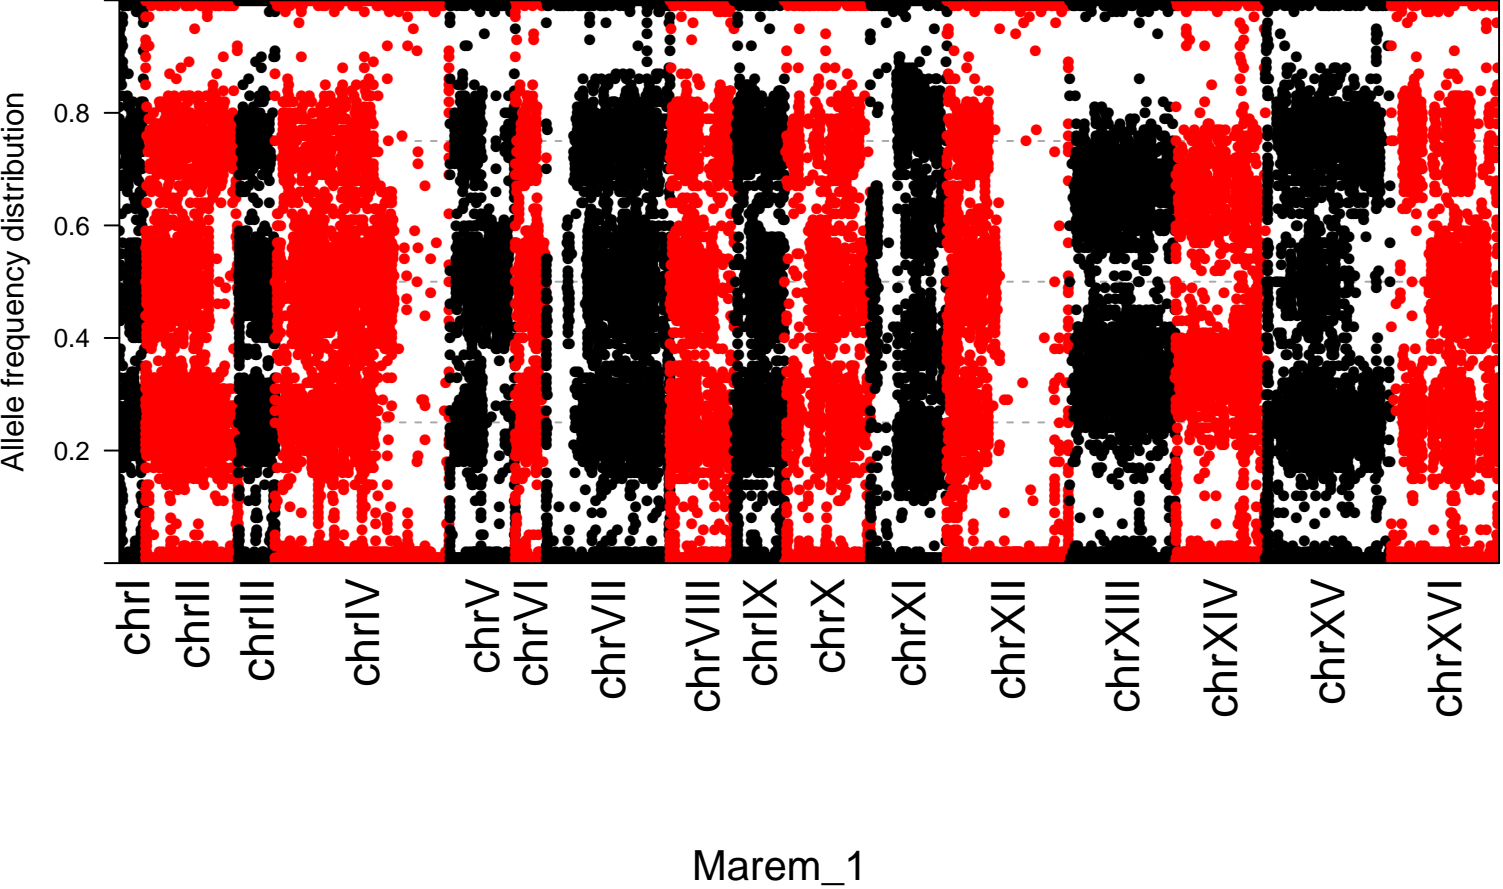

# Supplementary Figure S3

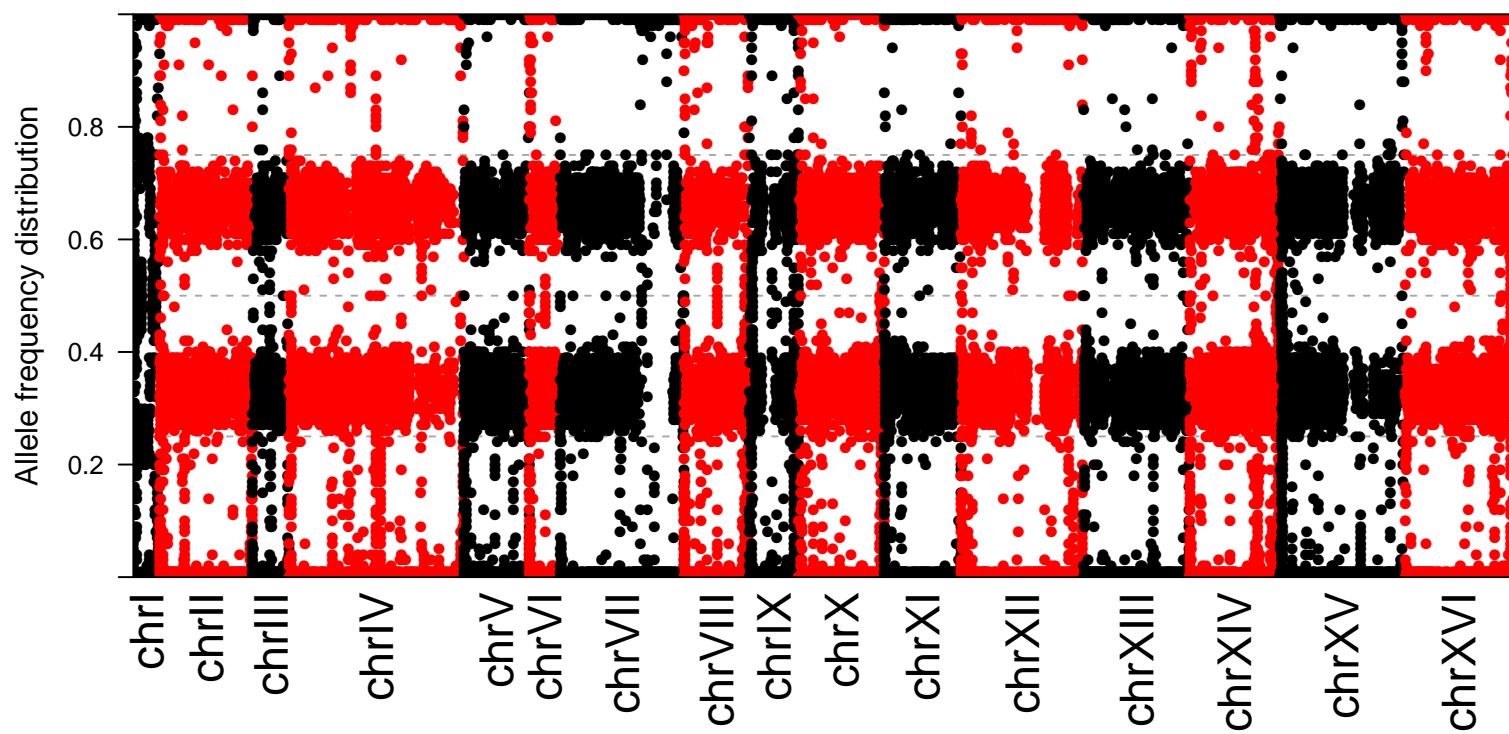

Marina\_1

# Supplementary Figure S3

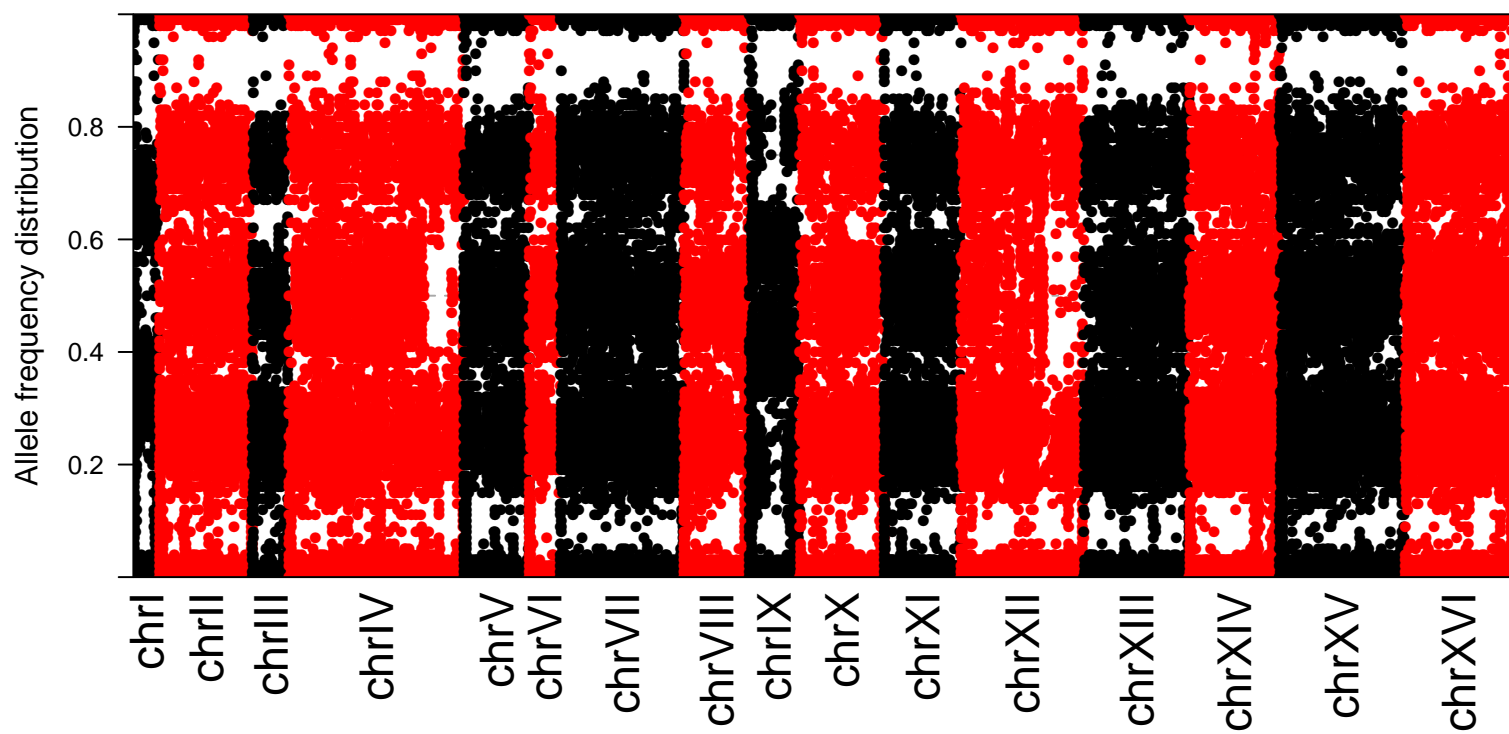

NCYC\_Hornindal\_1

# Supplementary Figure S3

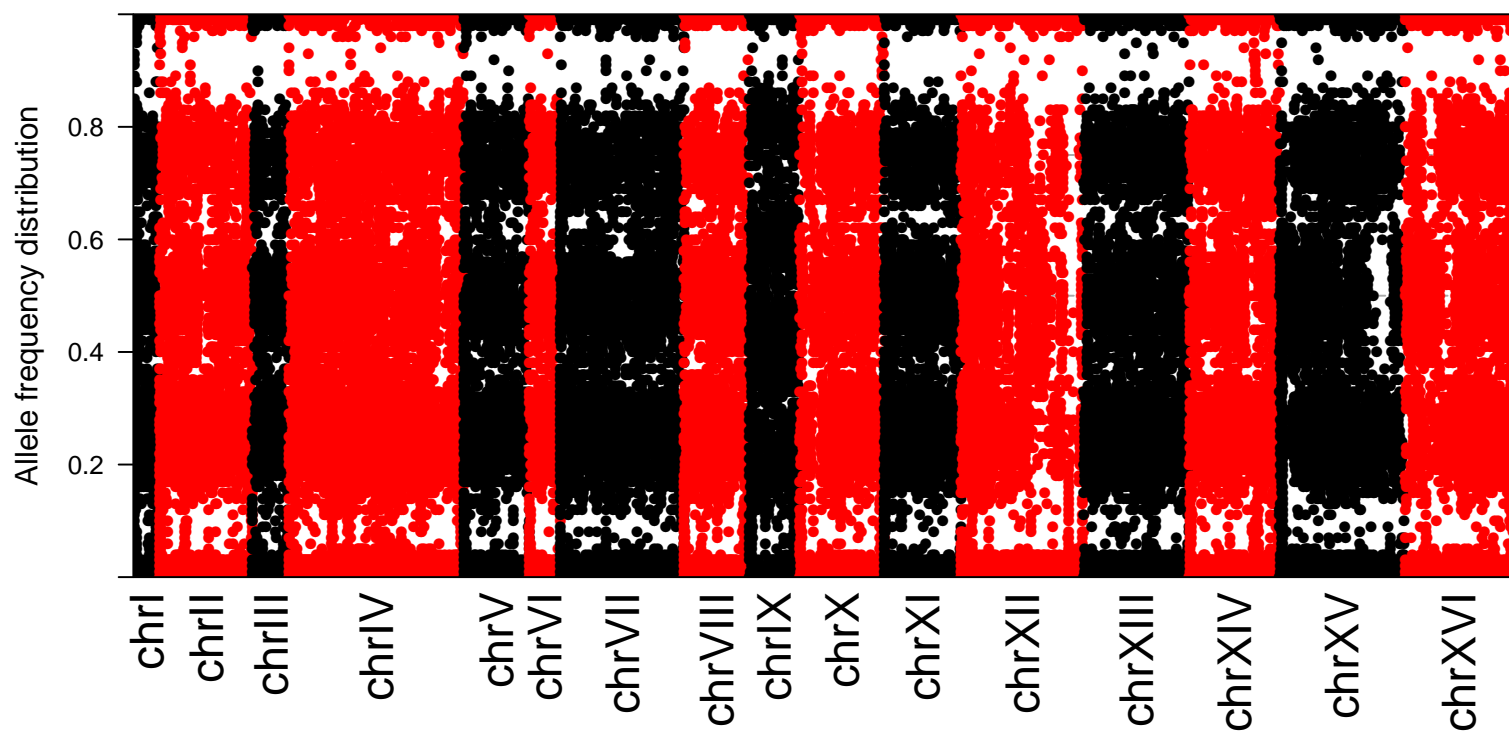

NCYC\_Hornindal\_2

# Supplementary Figure S3

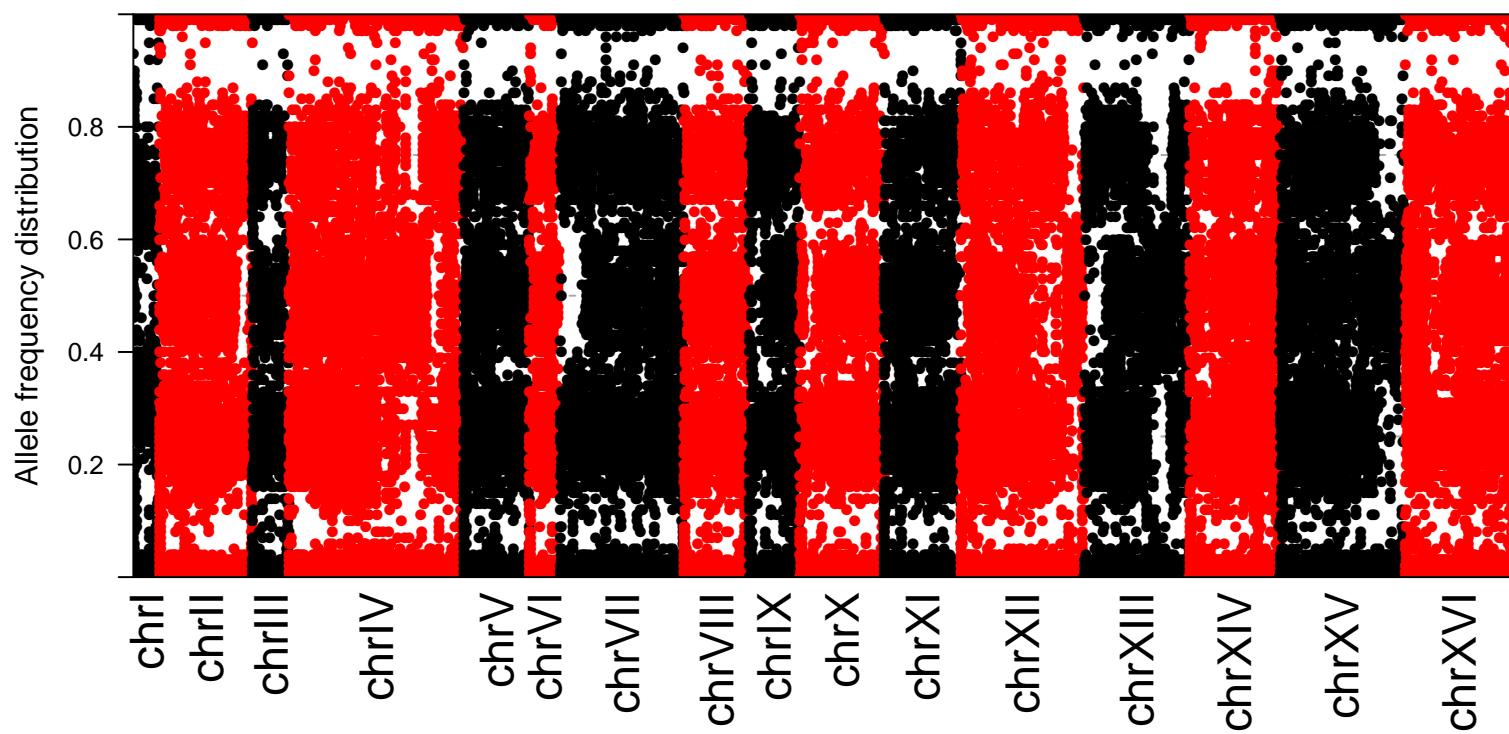

NCYC\_Rivenes\_1



# Supplementary Figure S3

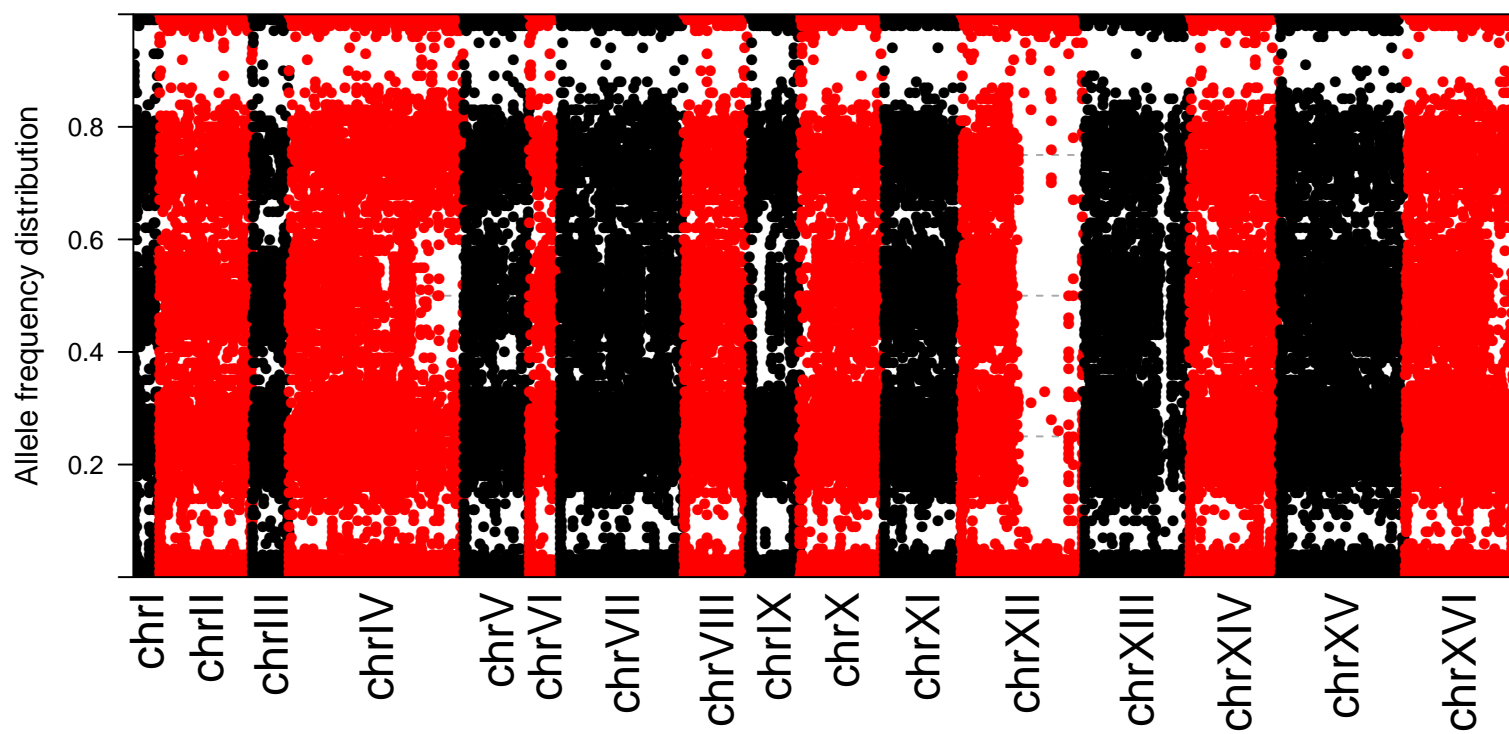

NCYC\_Rivenes\_2

# Supplementary Figure S3

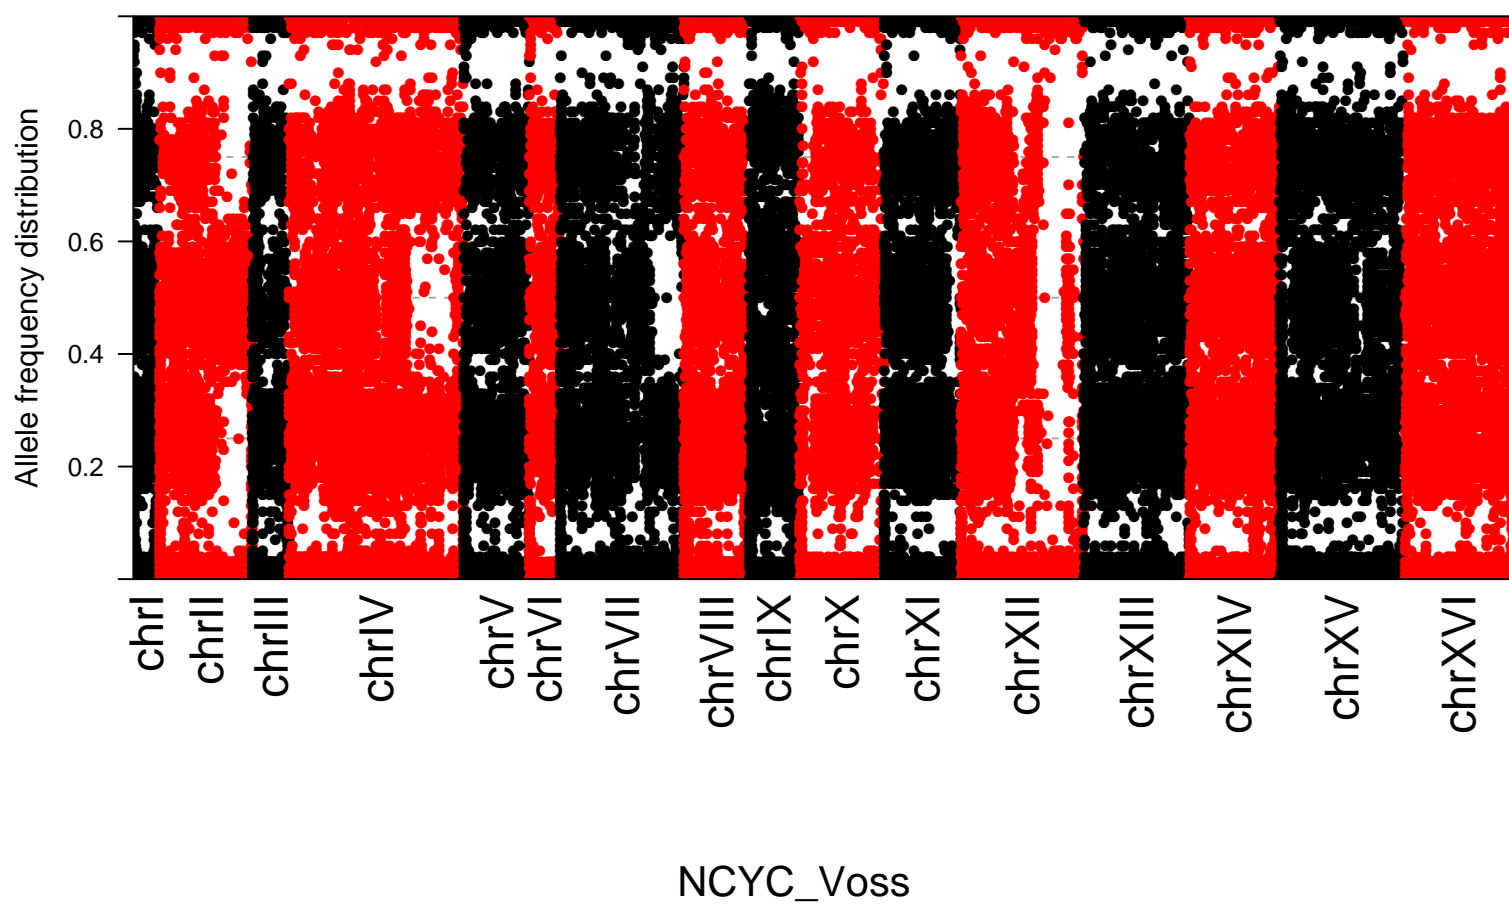

# Supplementary Figure S3

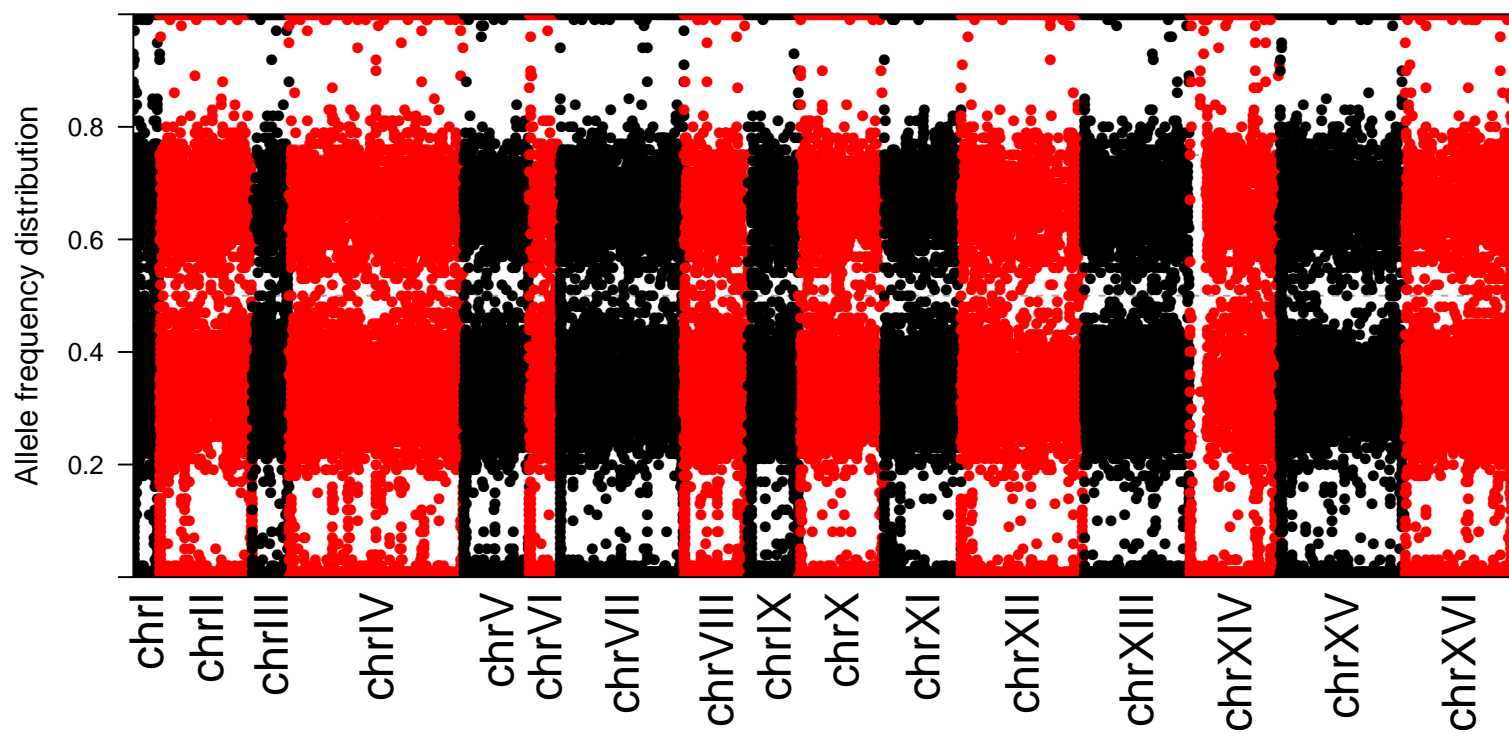

Pundurs\_2

# Supplementary Figure S3

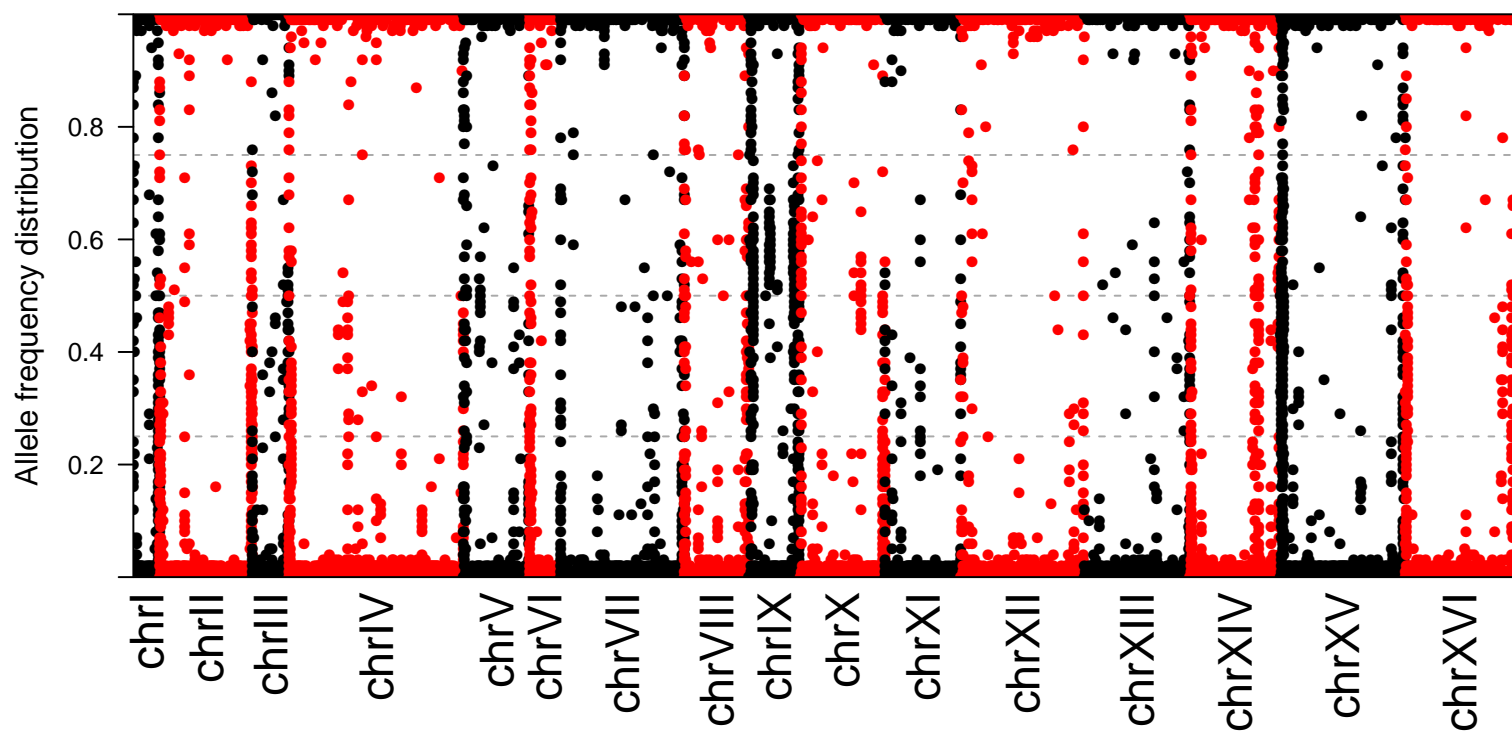

Pundurs1

# Supplementary Figure S3

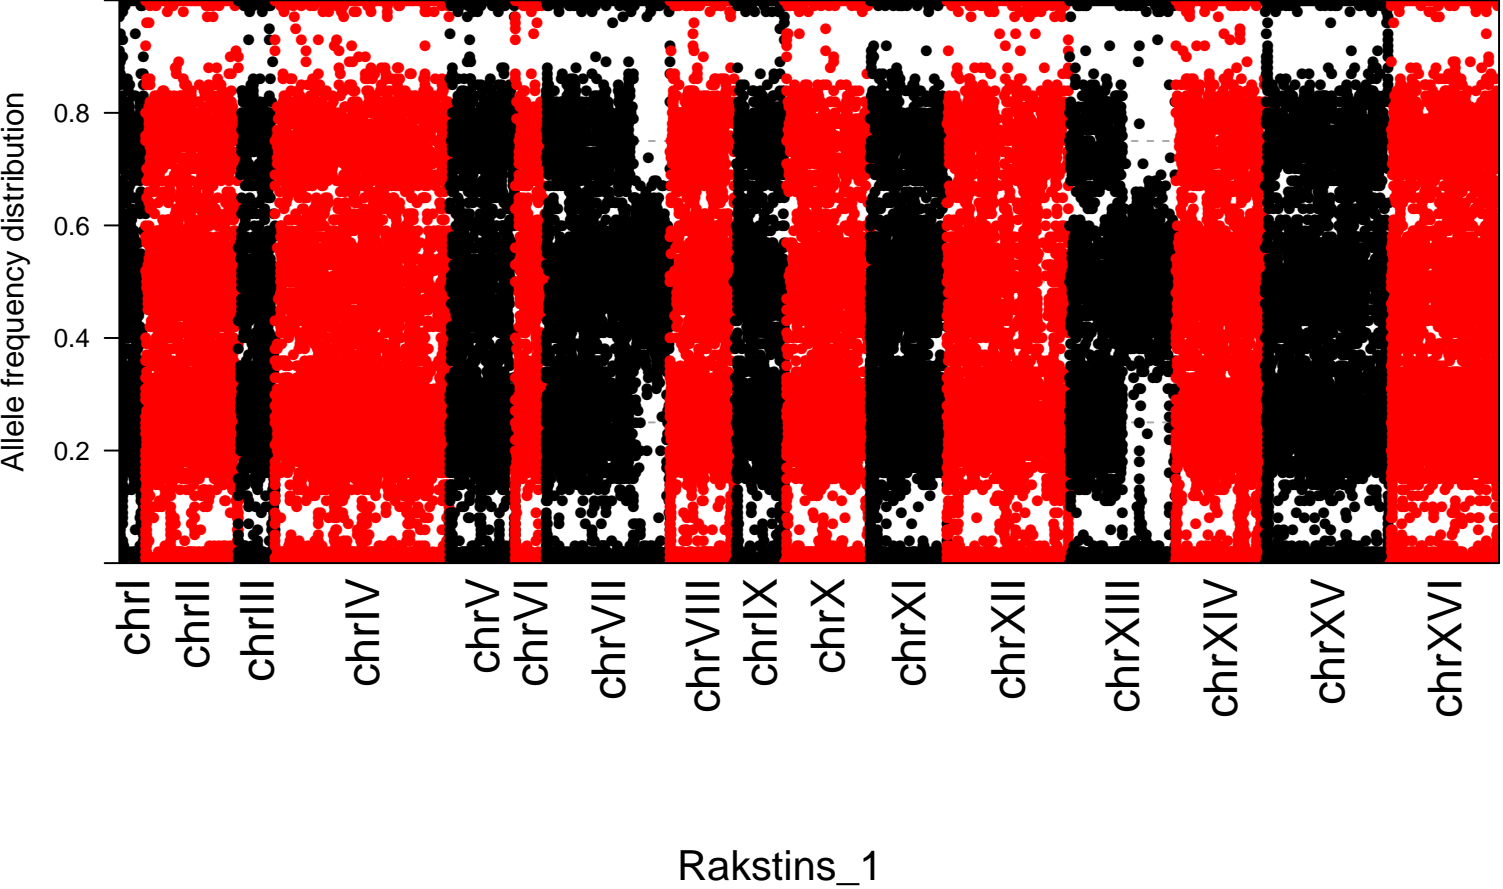

Supplementary Figure S3

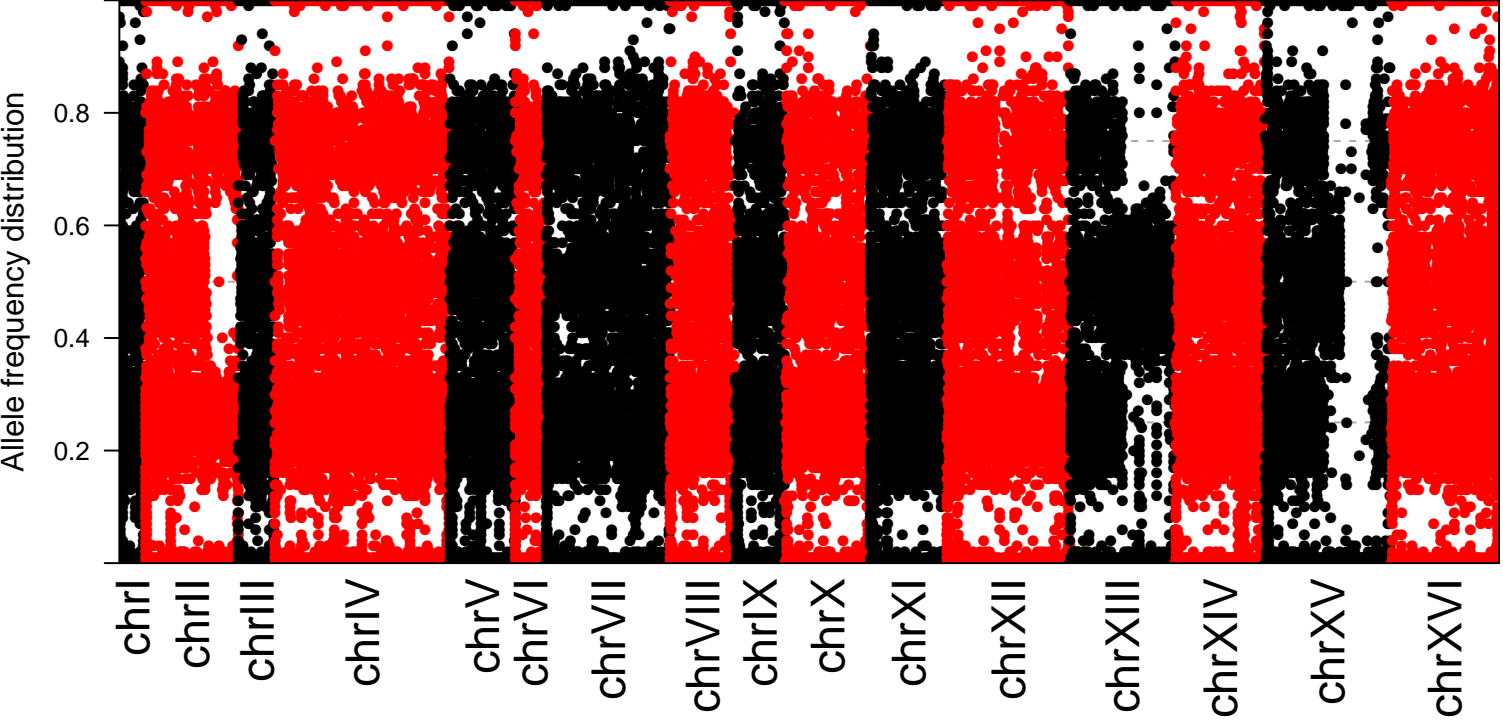

Rakstins\_2

Supplementary Figure S3

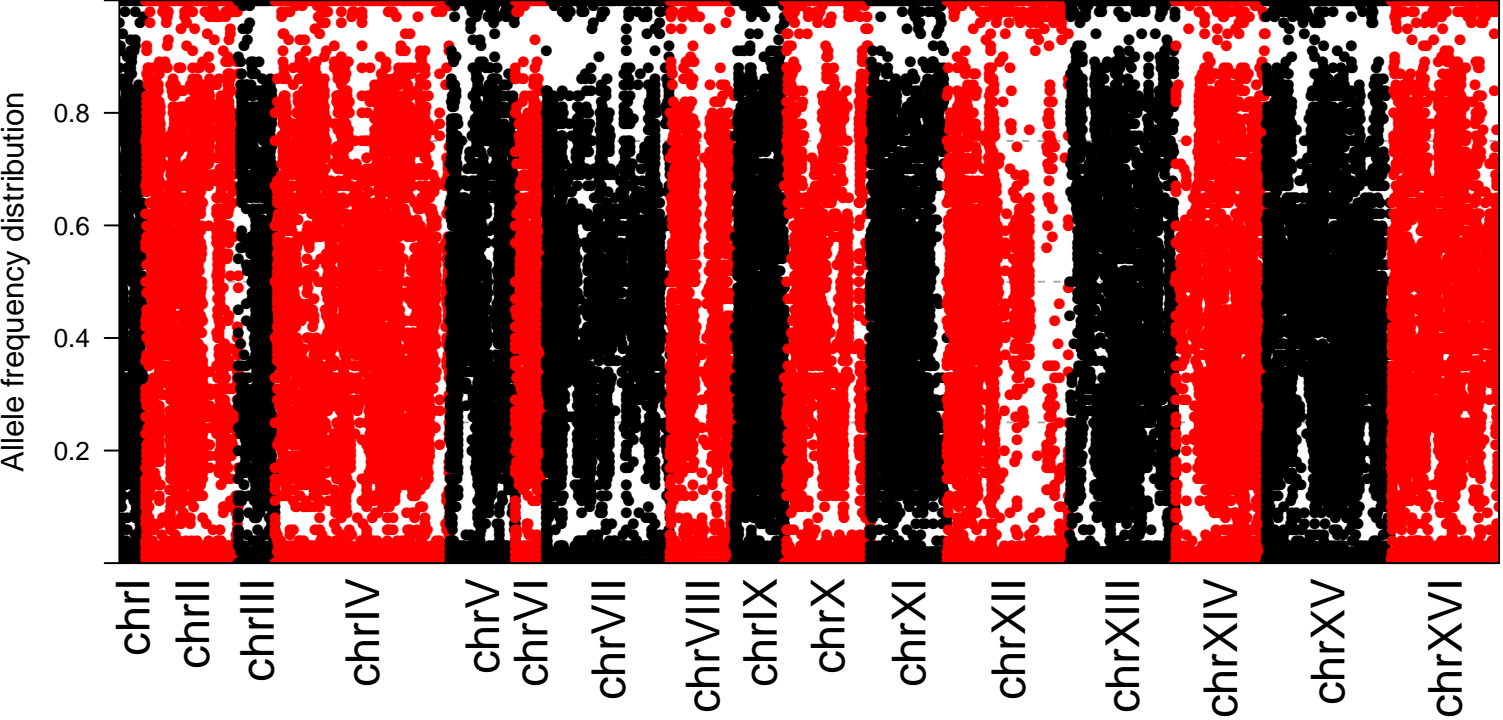

Rima1

# Supplementary Figure S3

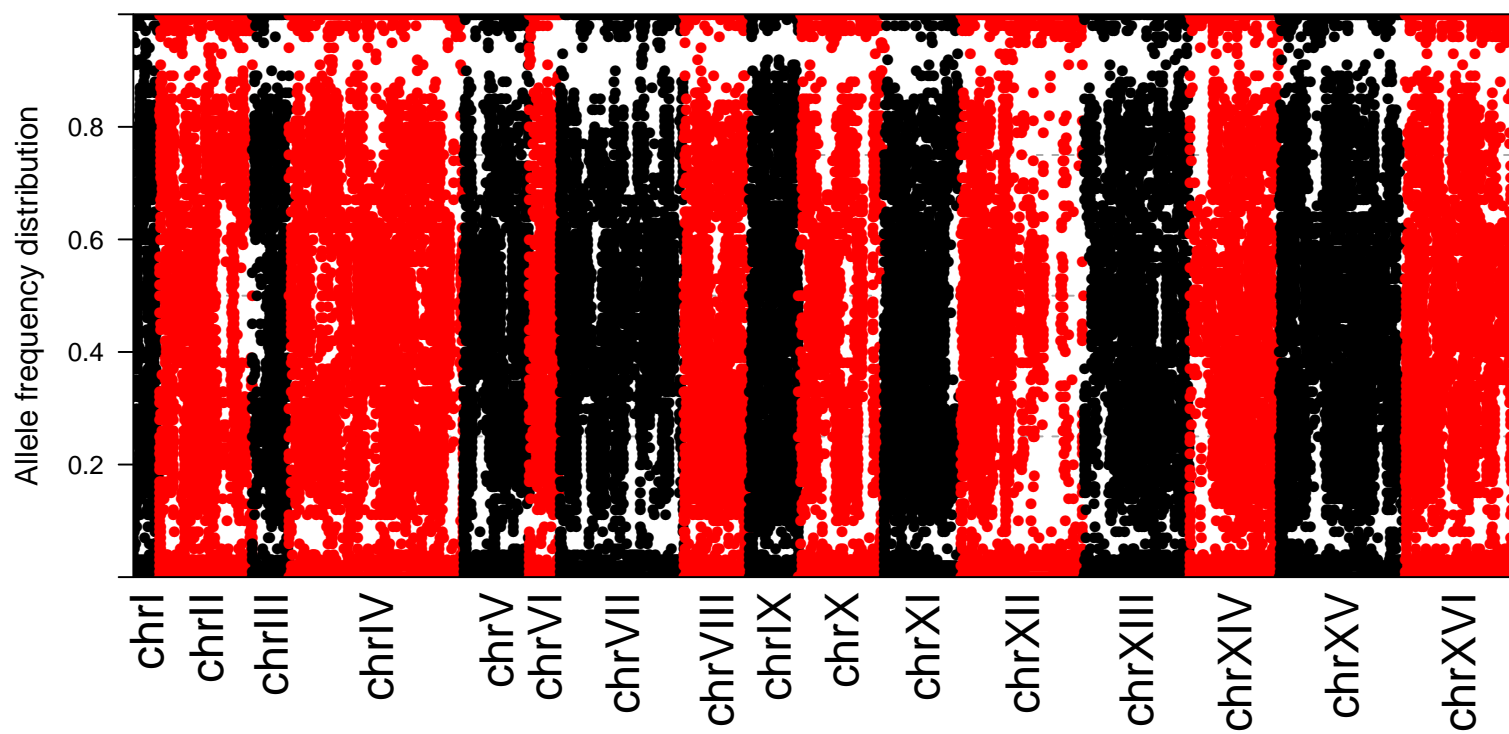



# Supplementary Figure S3

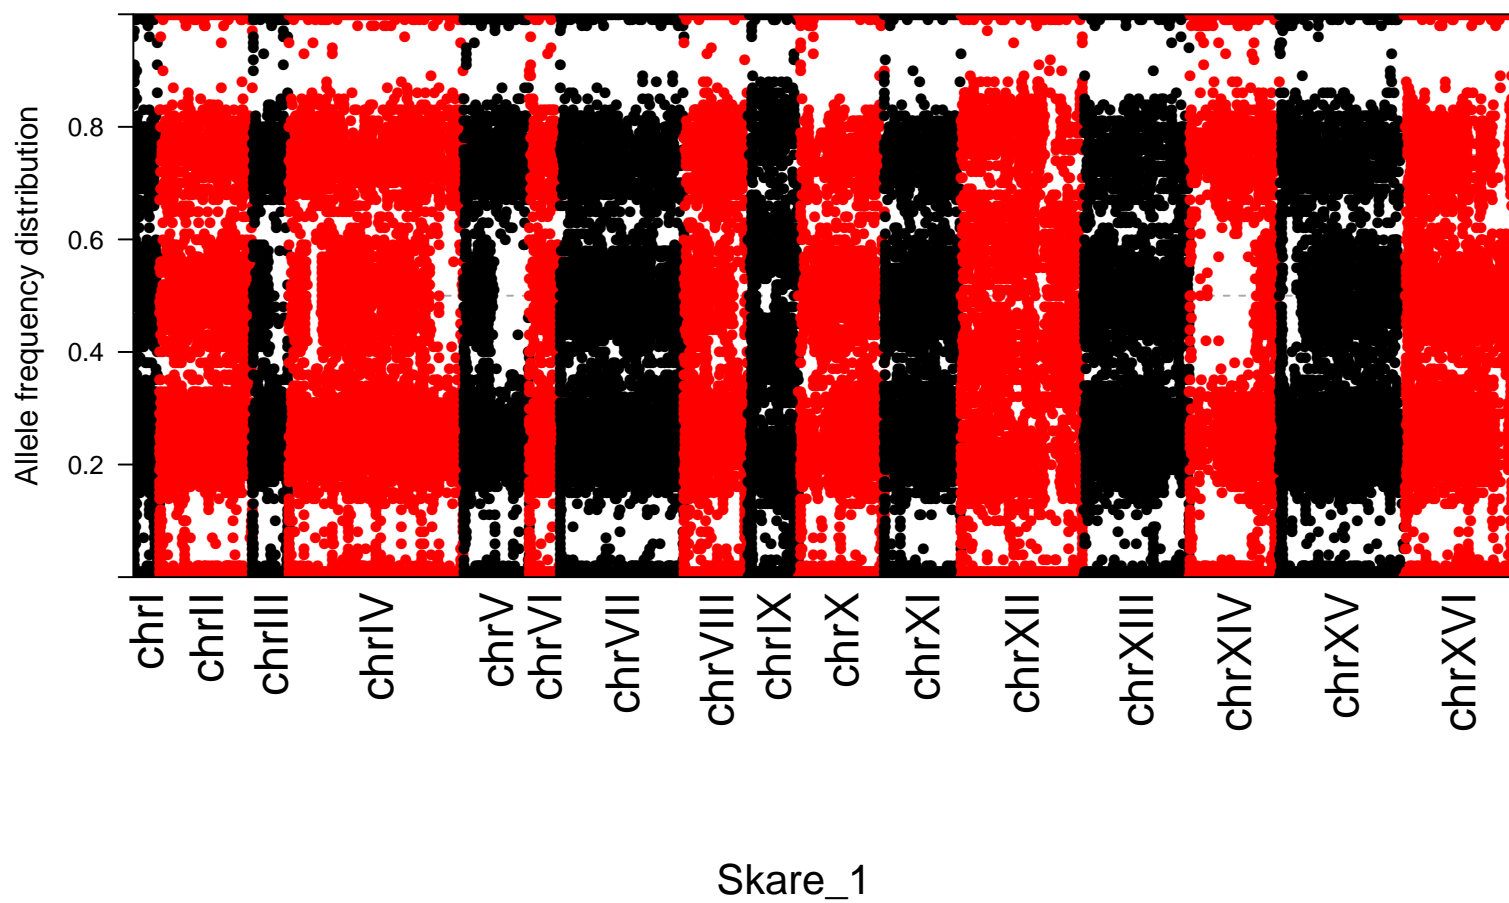

# Supplementary Figure S3

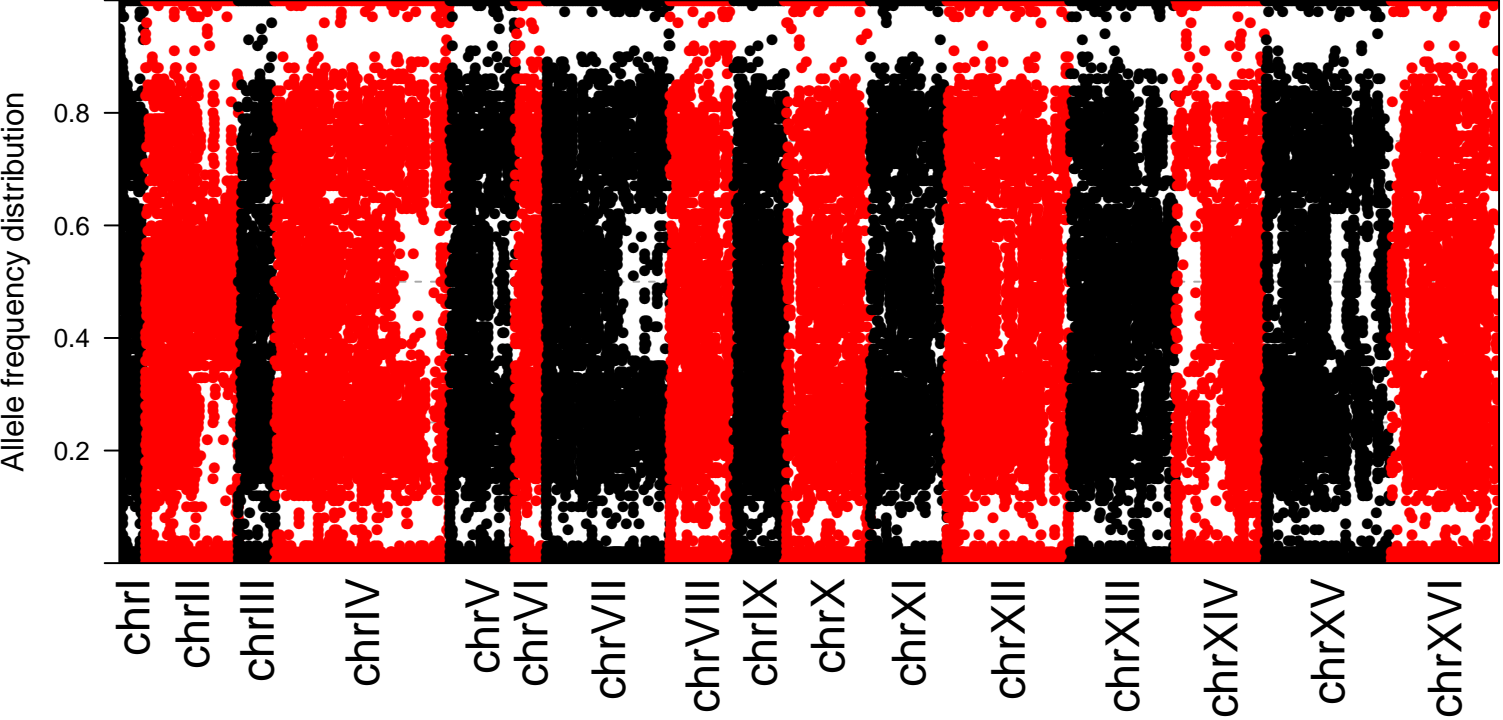

Skrindo2

# Supplementary Figure S3

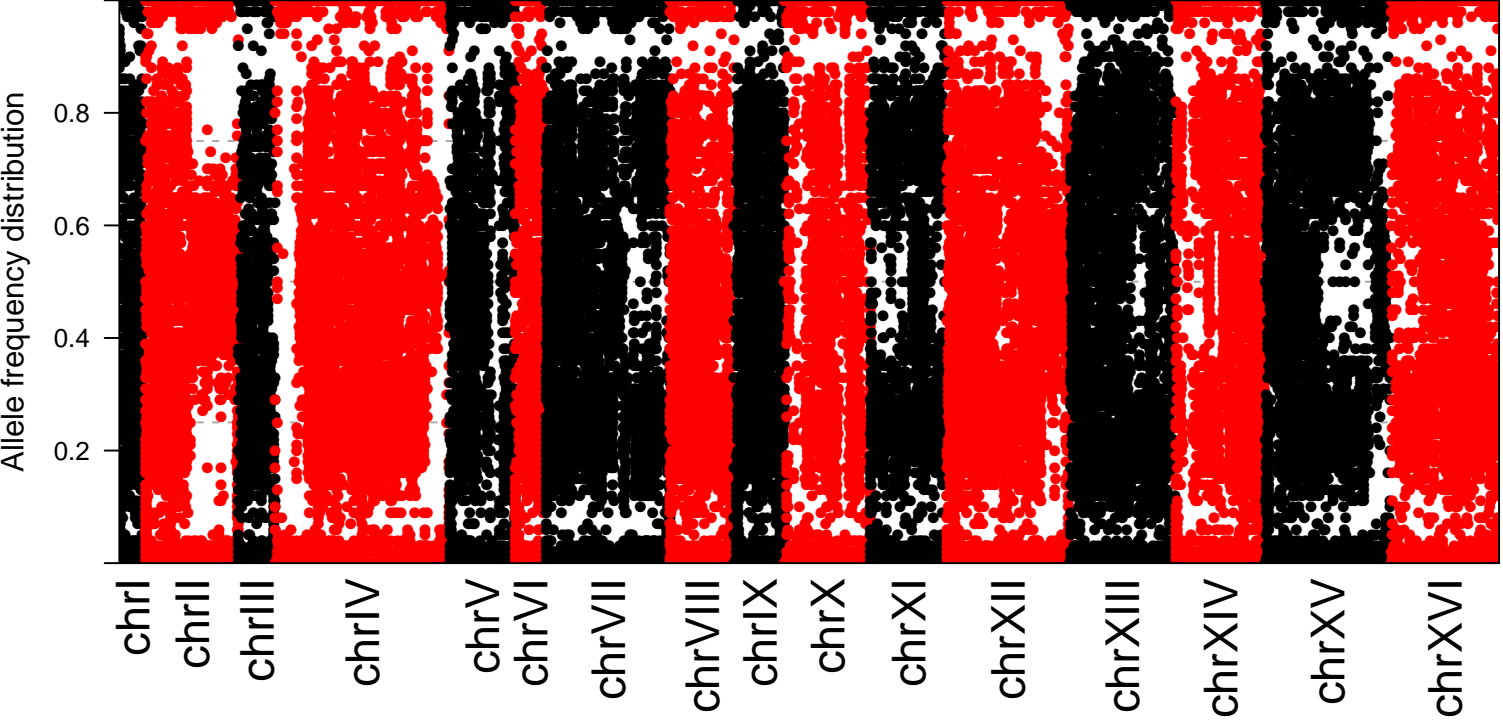

Skrindo5

# Supplementary Figure S3

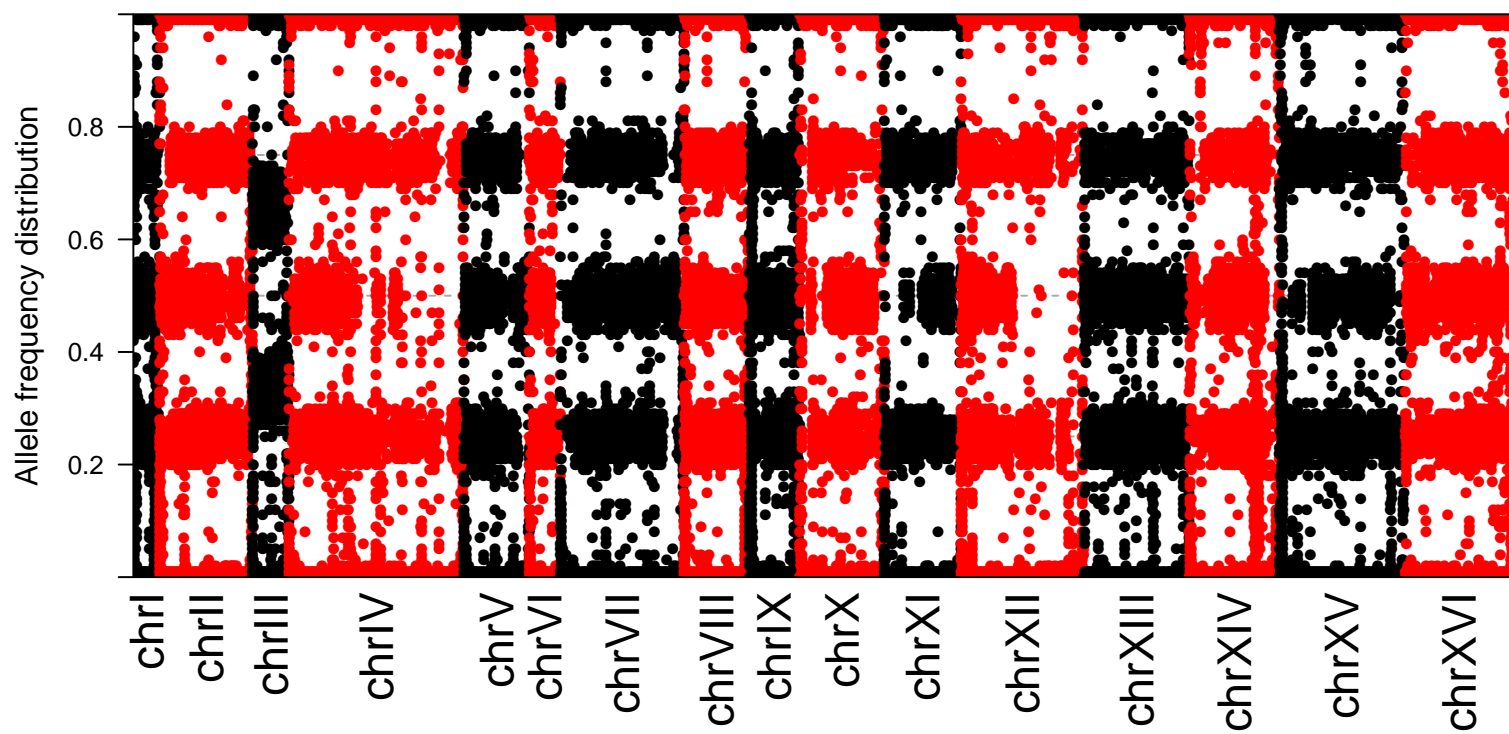

Stordal\_Ebbegarden\_1

# Supplementary Figure S3

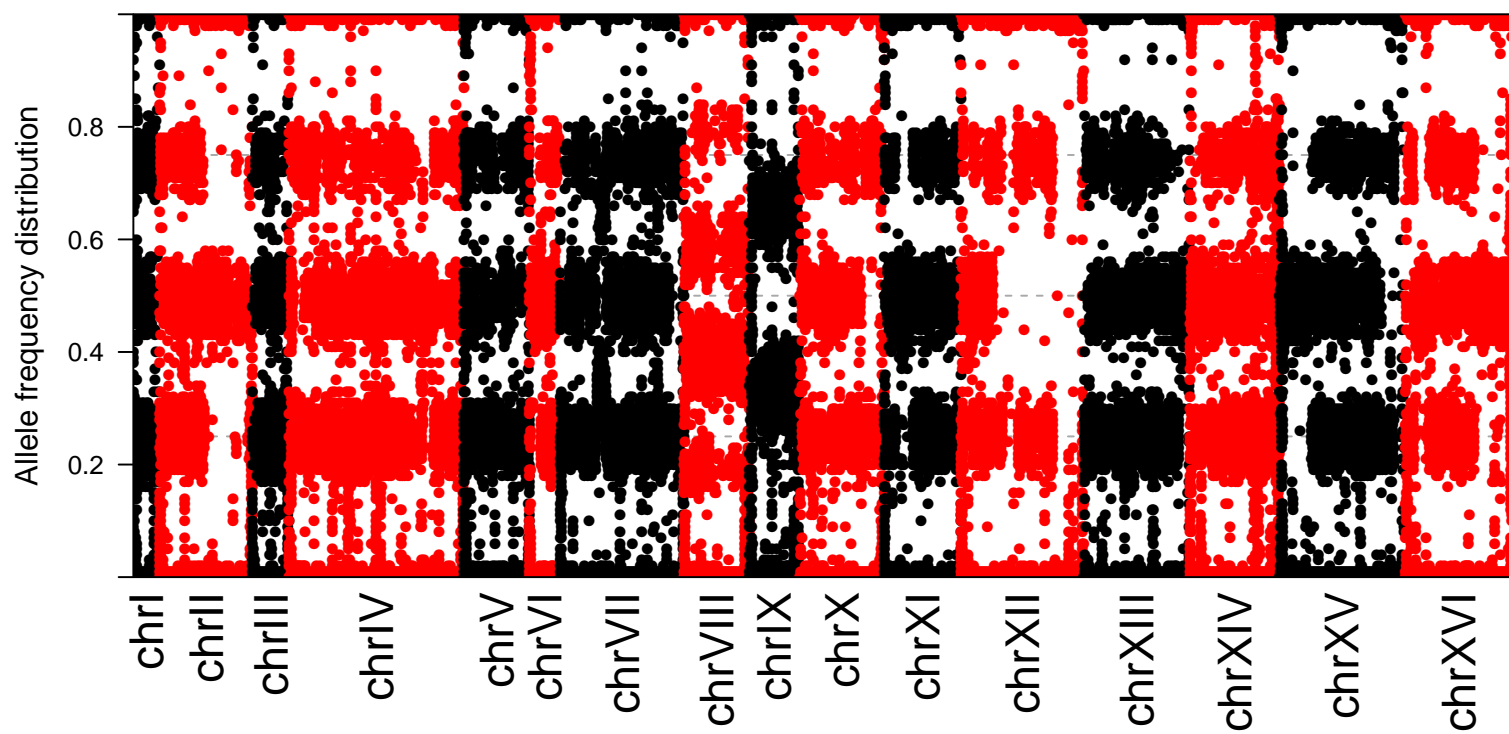

Suomen\_Hiiva

Supplementary Figure S3

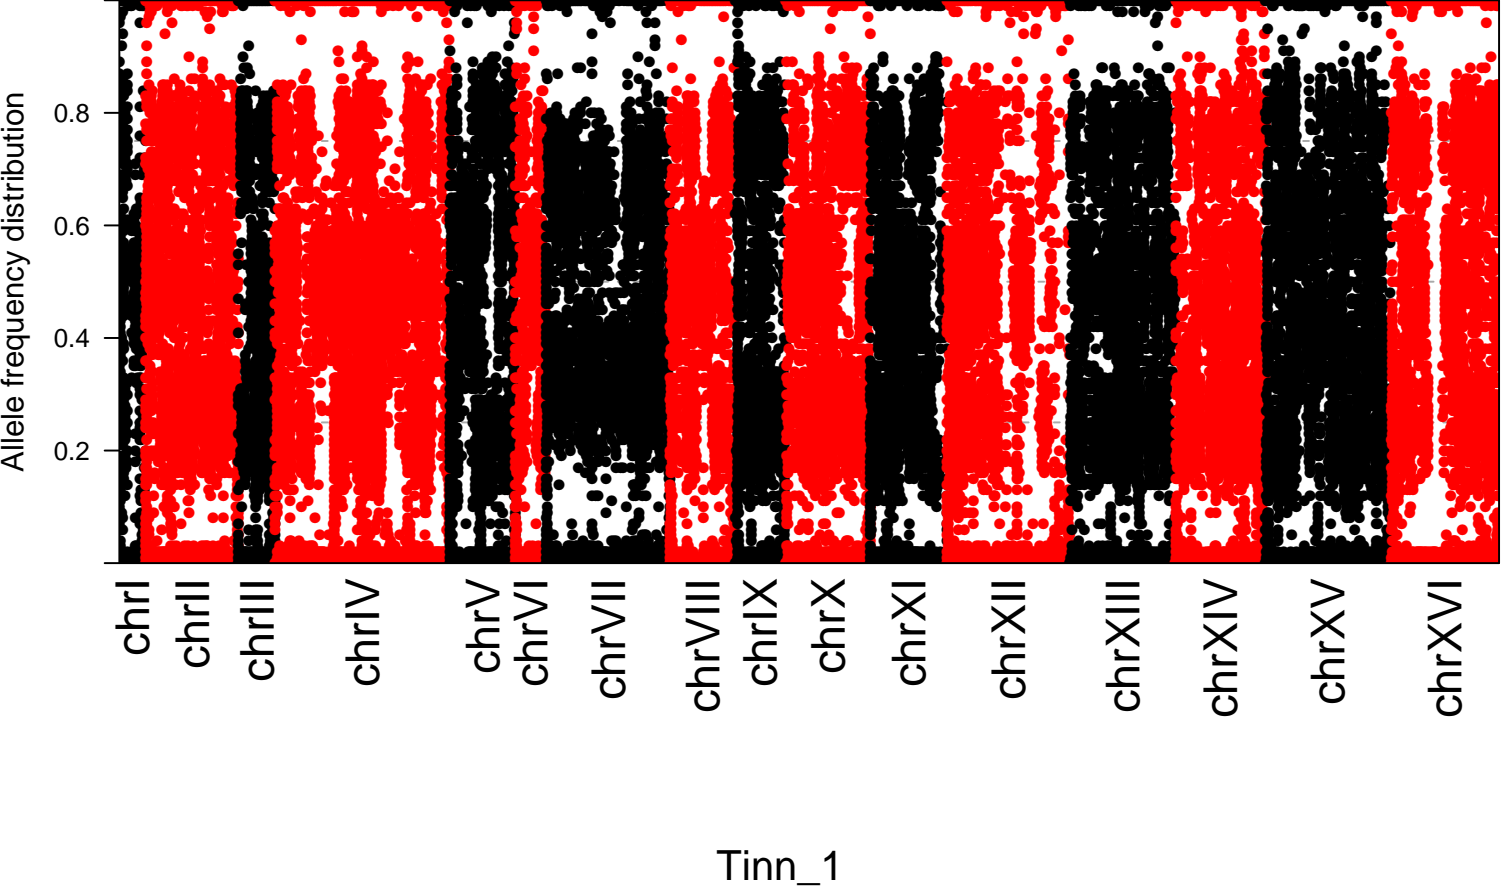

# Supplementary Figure S3

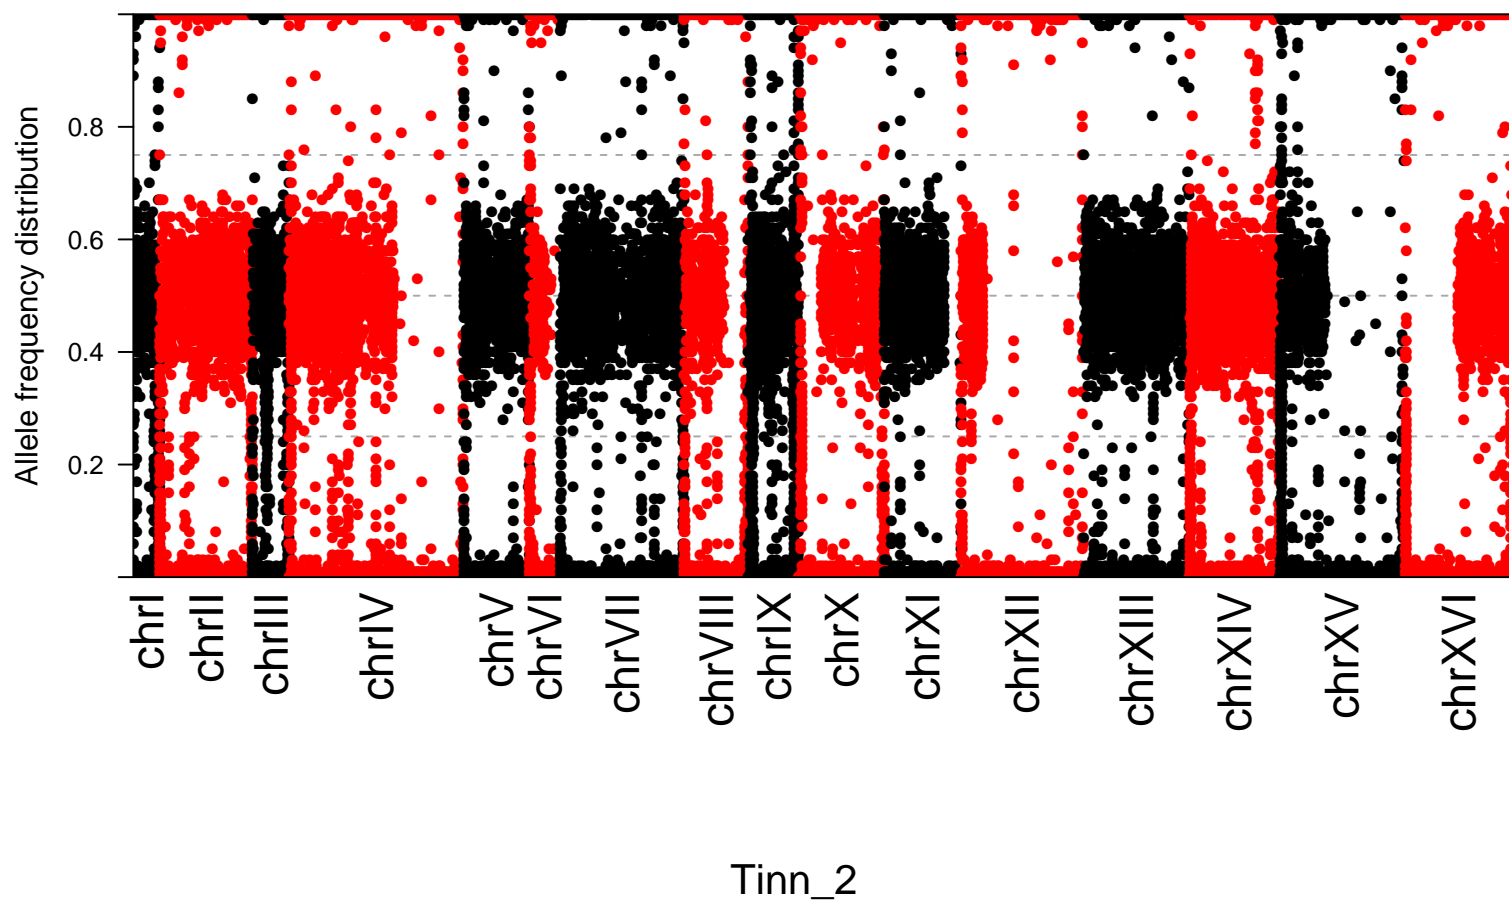

# Supplementary Figure S3

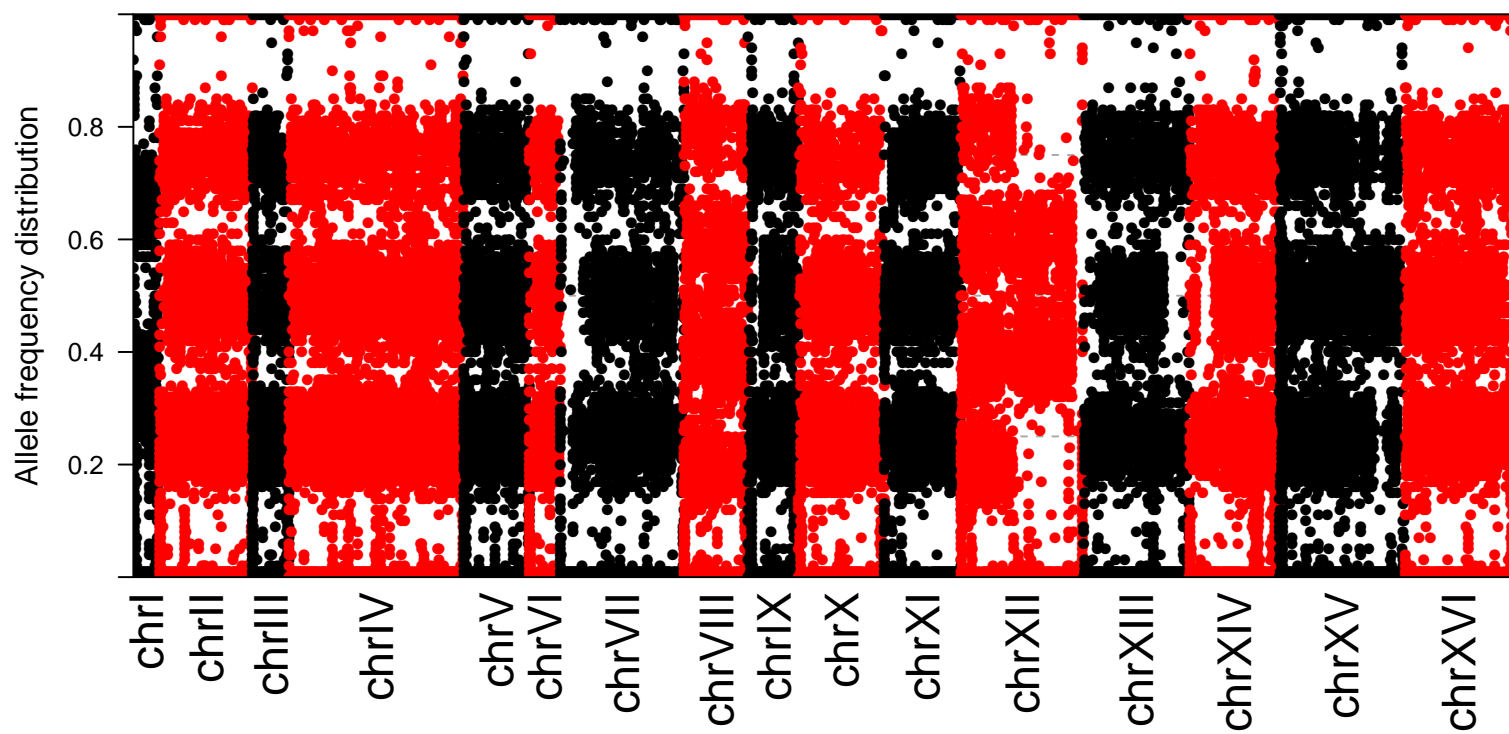

Tormodsgarden\_1



Supplementary Figure S3

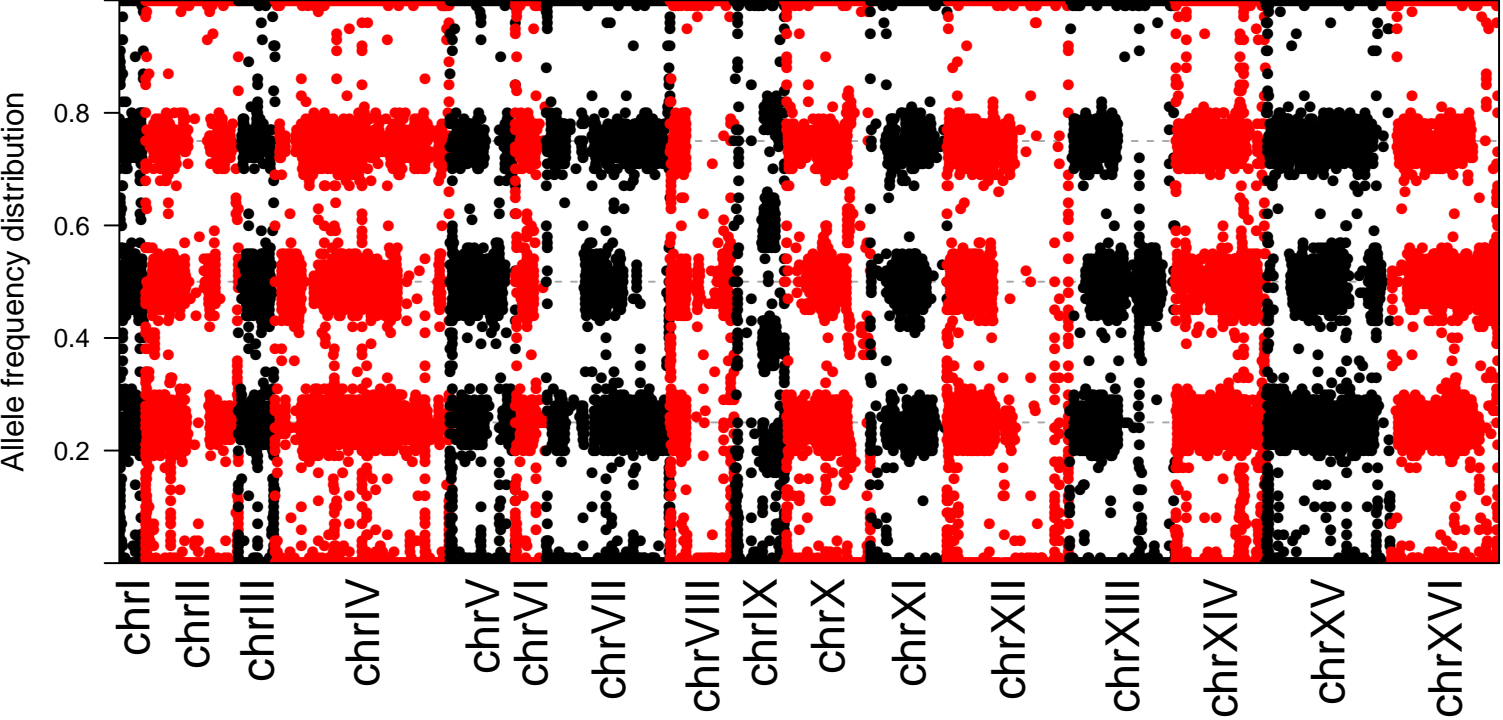

Überweizen

Supplementary Figure S3

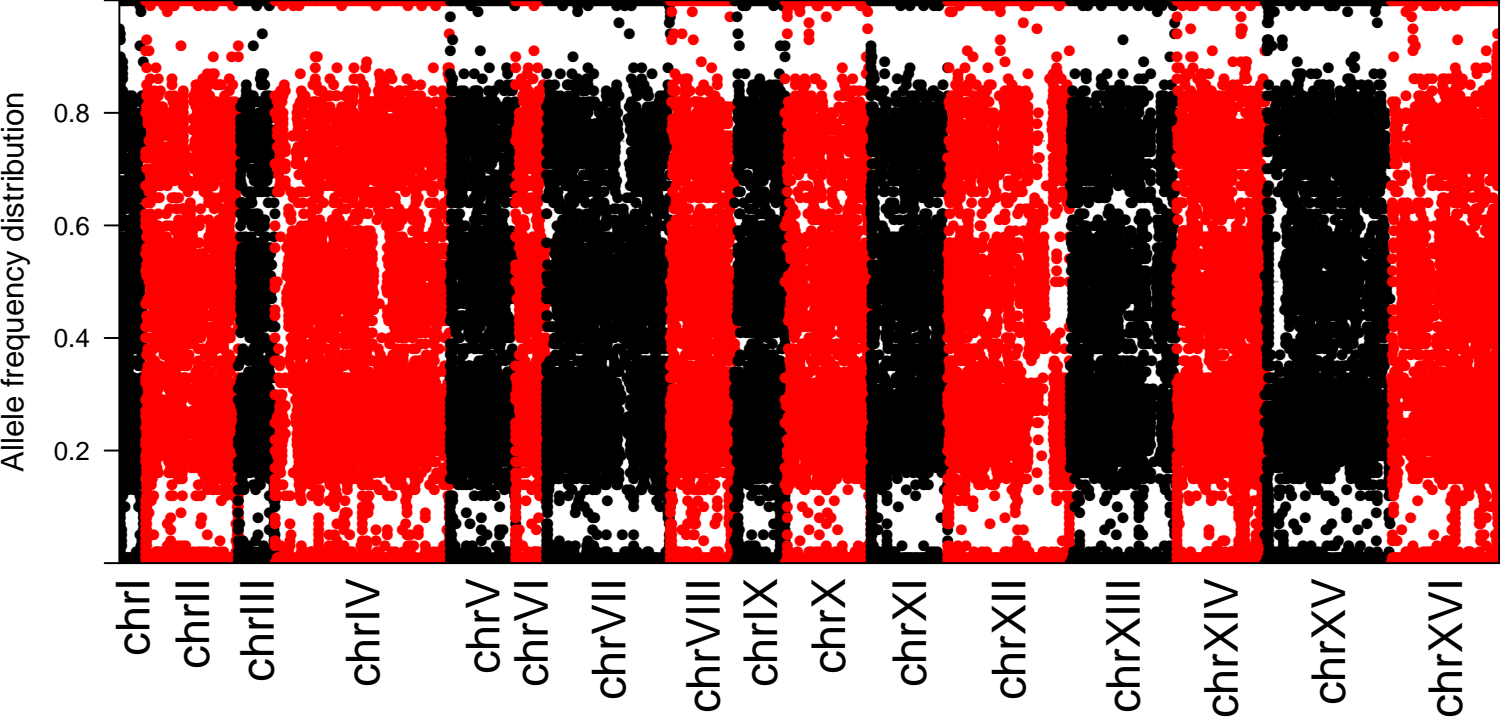

Vabalninkas\_1

# Supplementary Figure S3

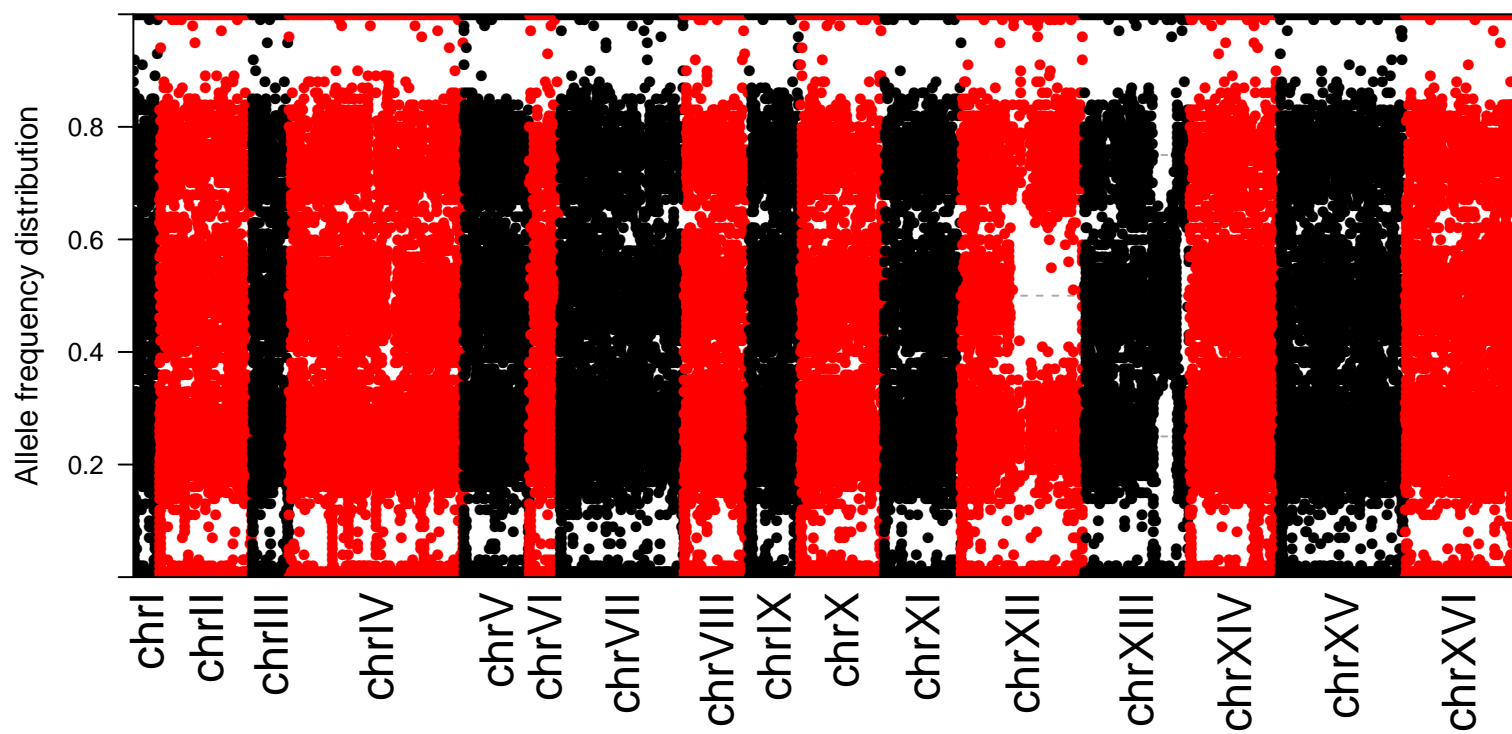

Vikintas

# Supplementary Figure S3

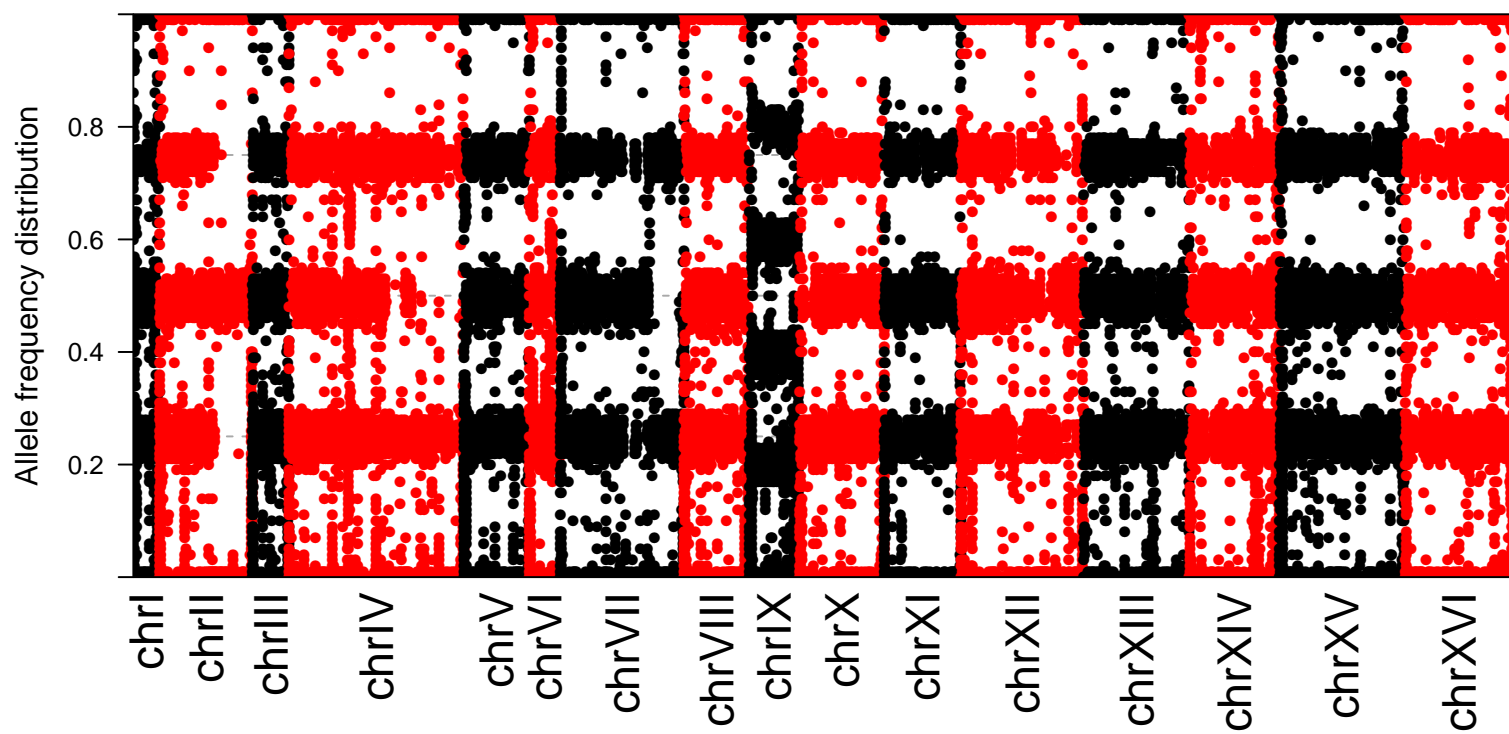

Voss\_1

Supplementary Figure S3

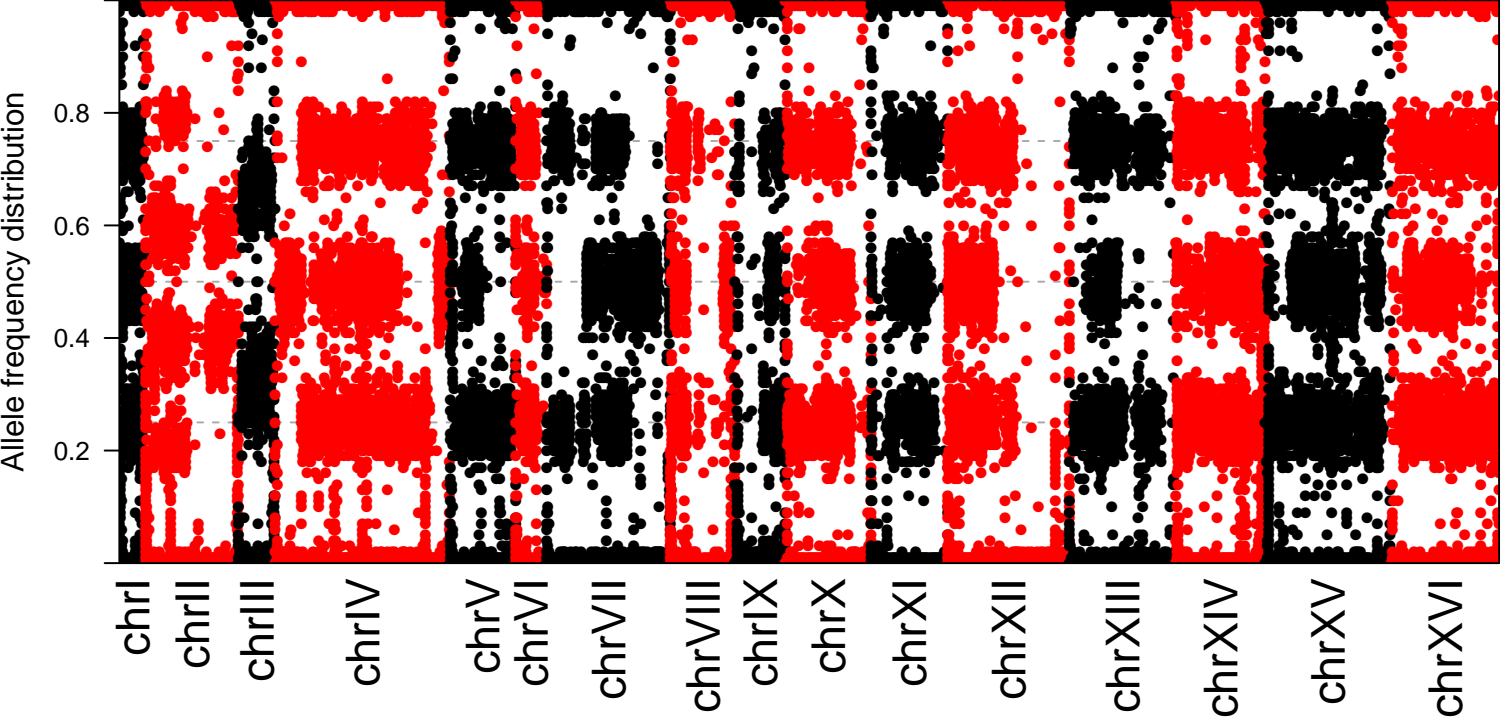

Weizen\_1

# Supplementary Figure S3

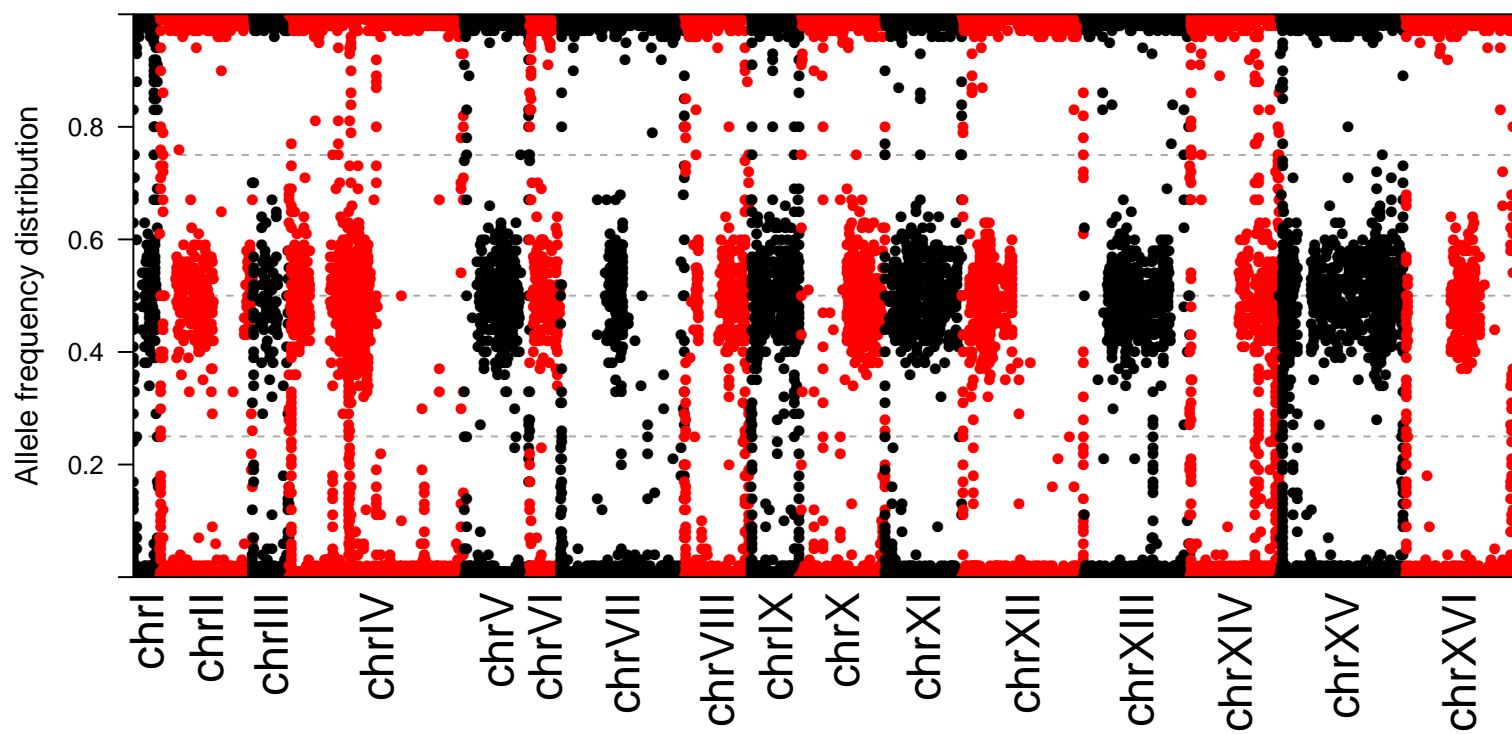

wine003

# Supplementary Figure S3

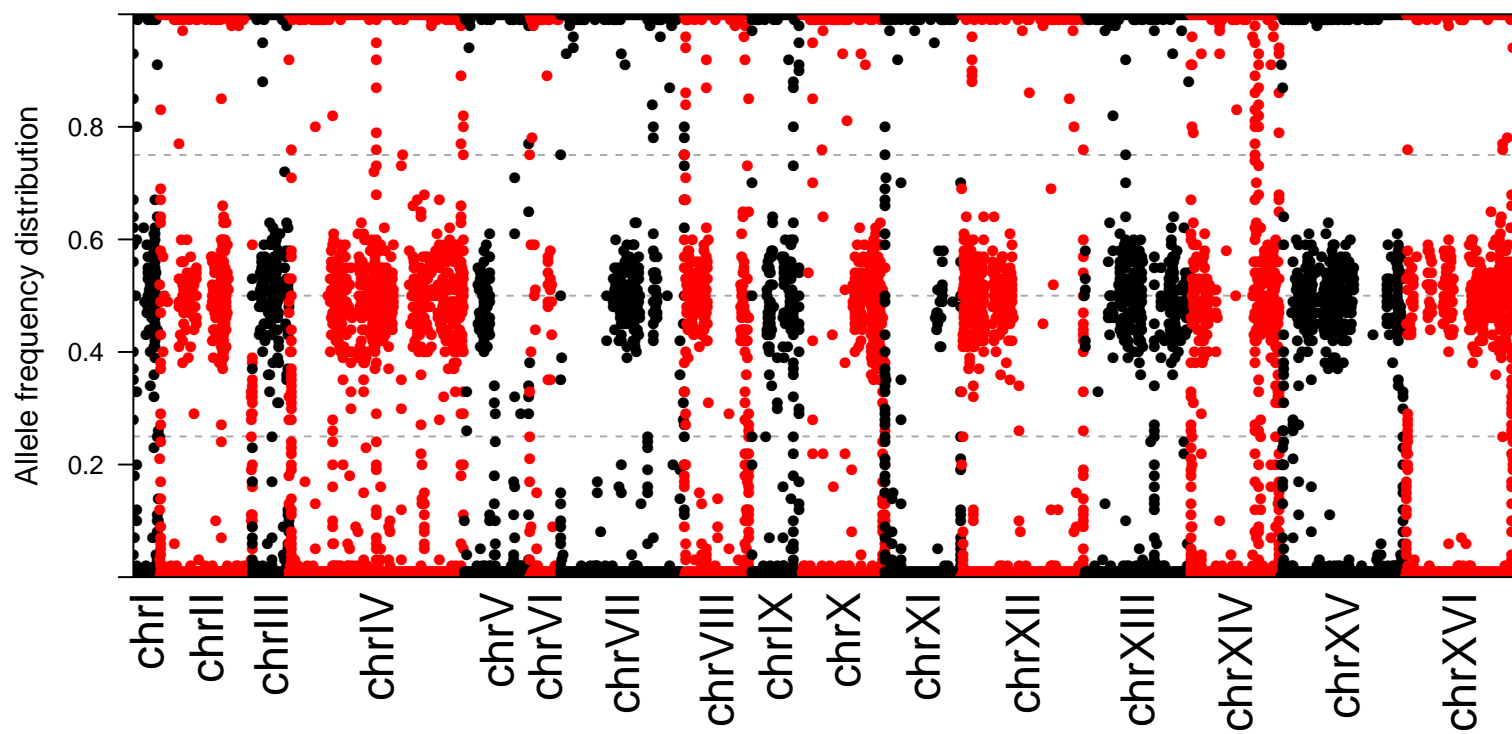

wine005

# Supplementary Figure S4A

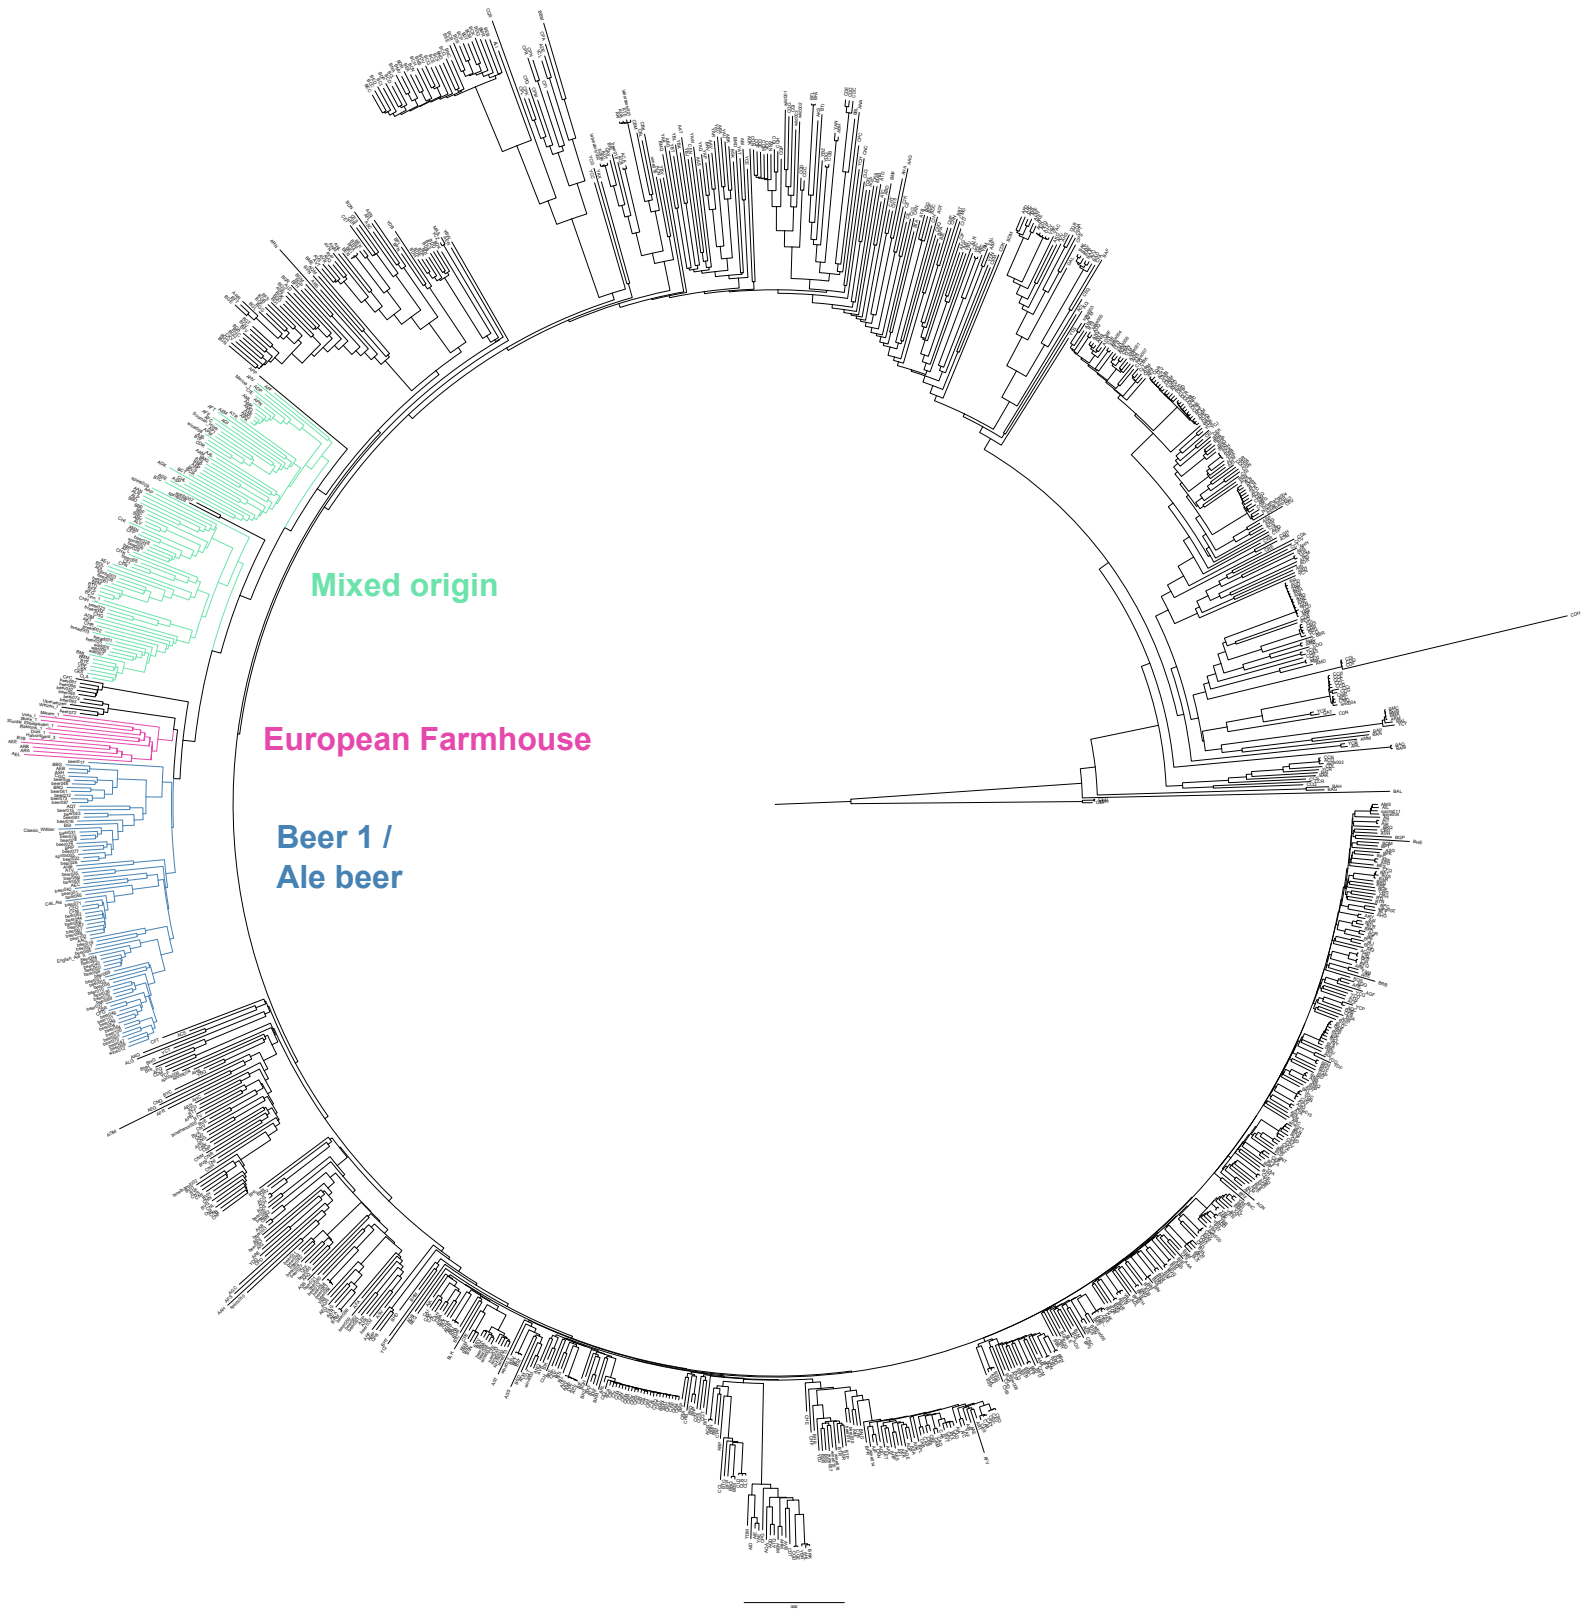



# Supplementary Figure S4B

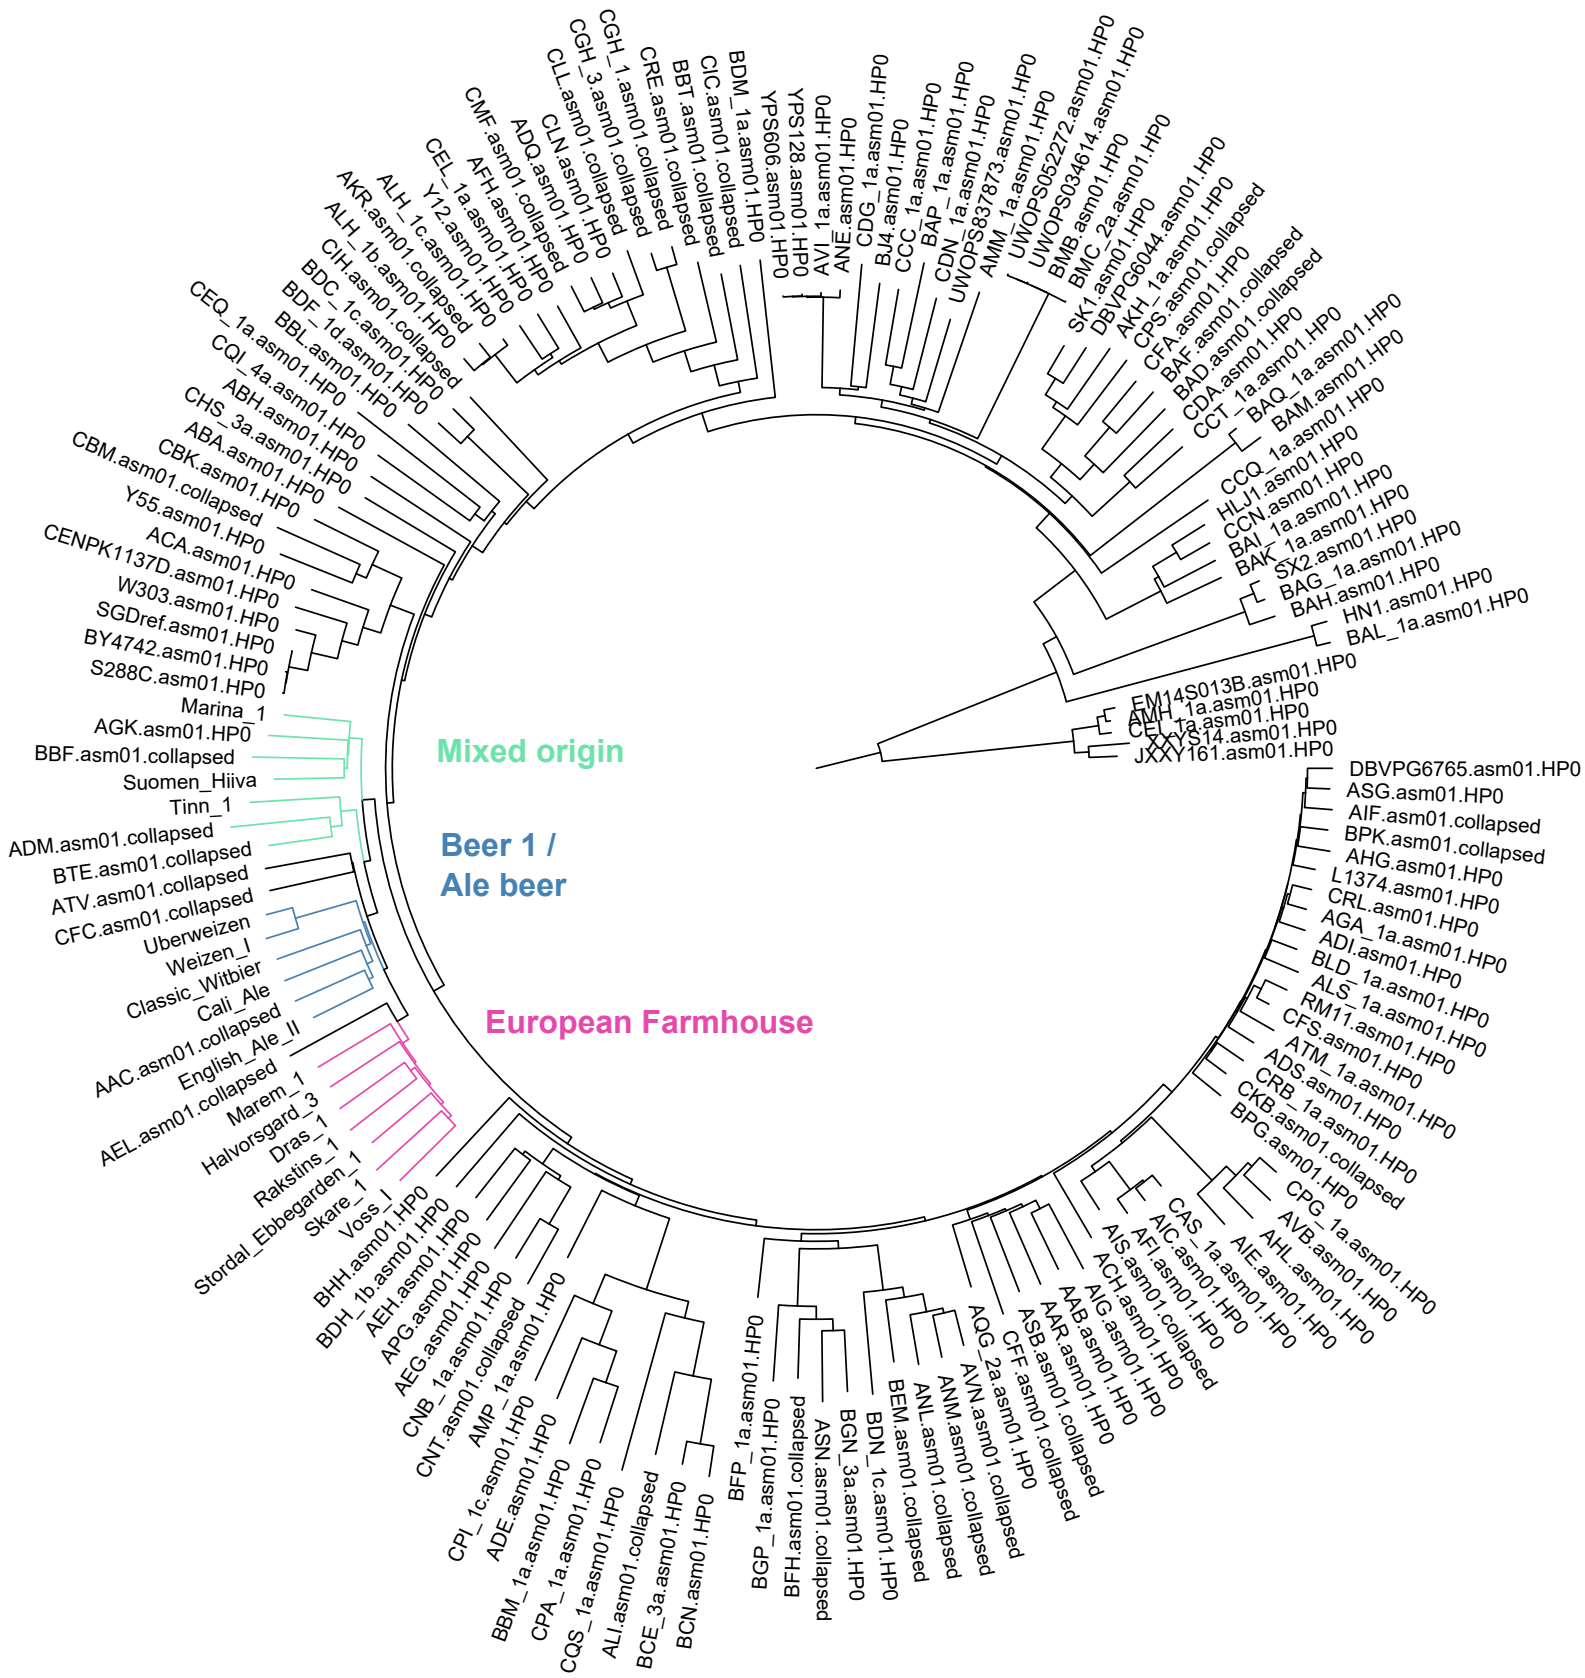

# Supplementary Figure S5A

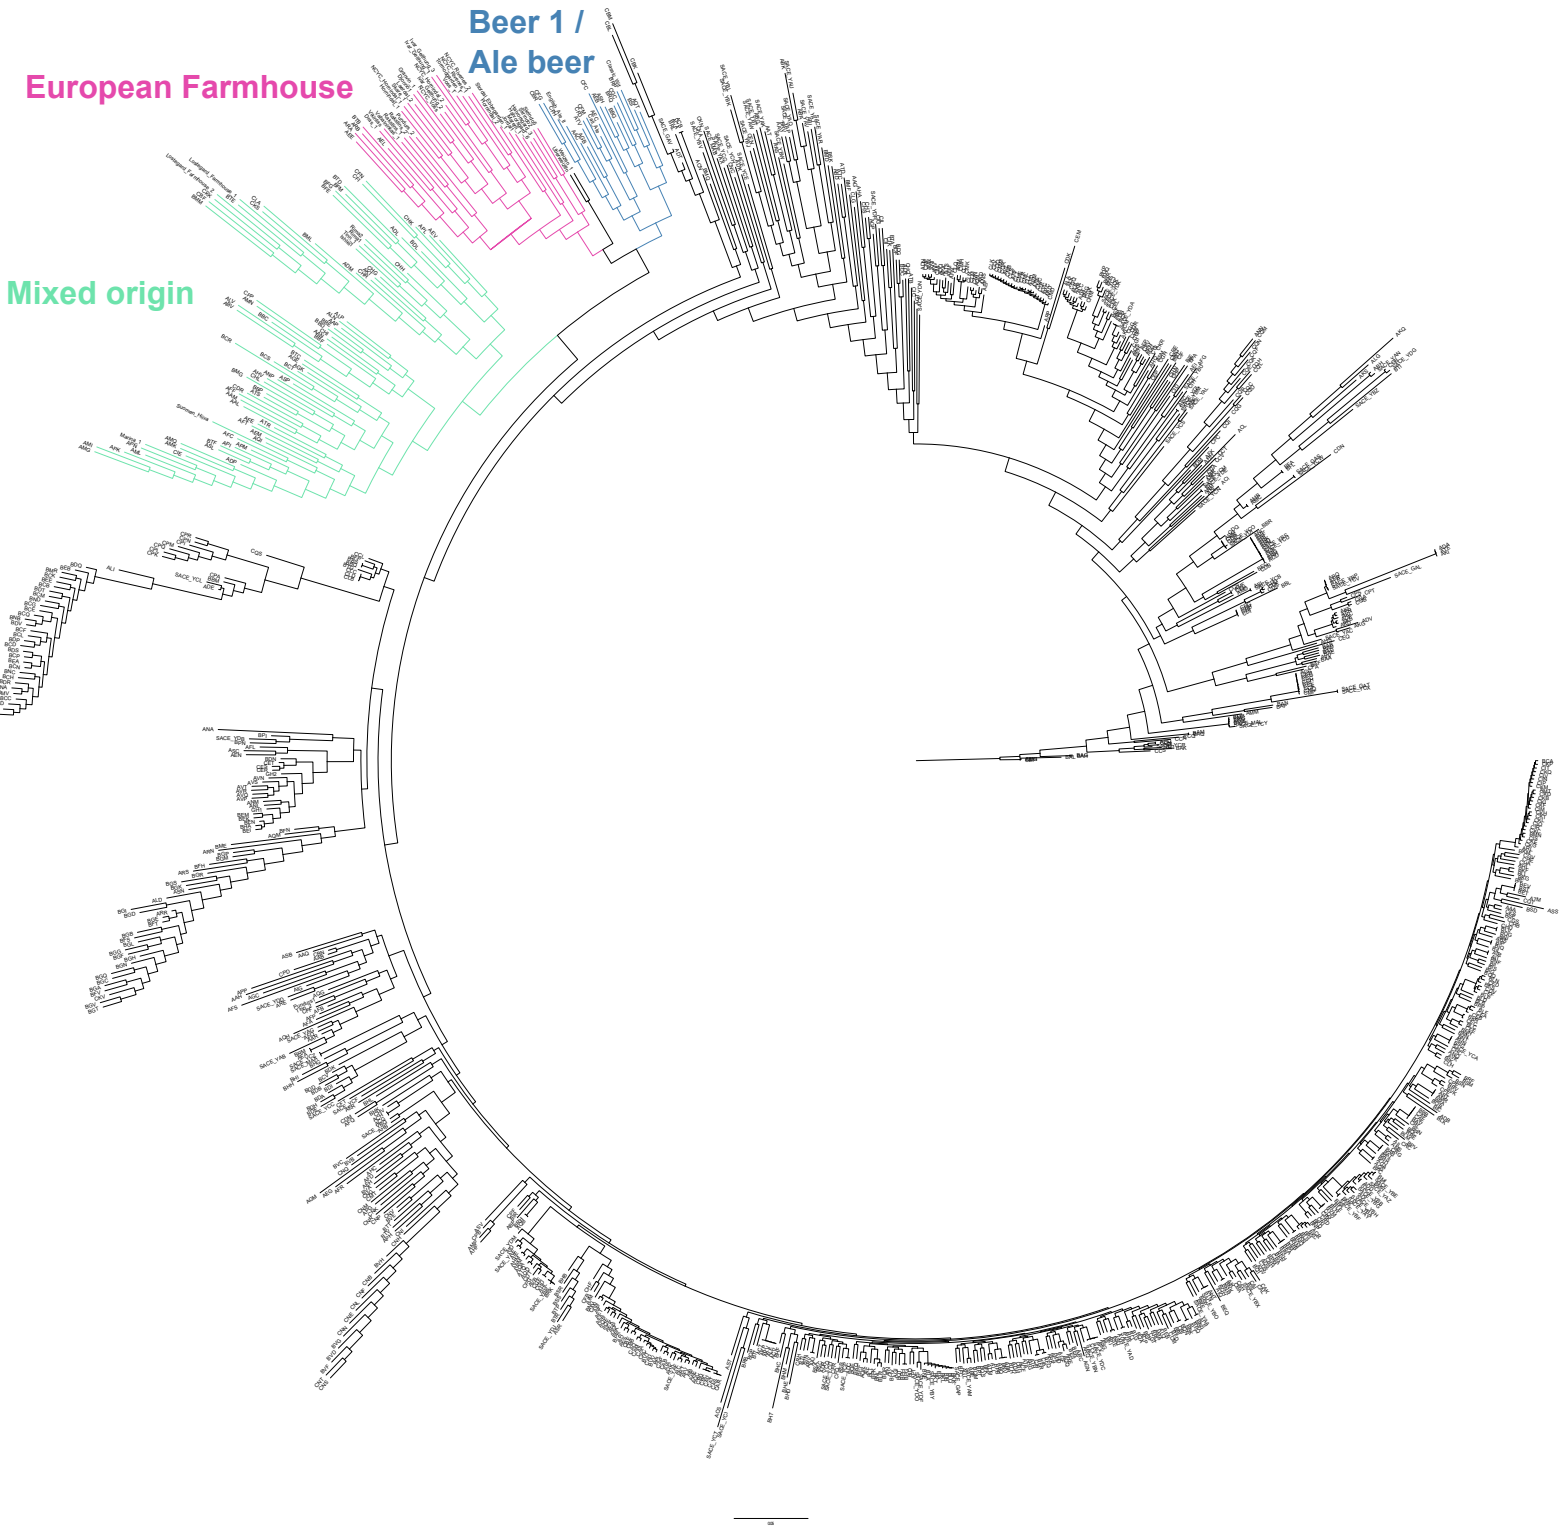

# Supplementary Figure S5B

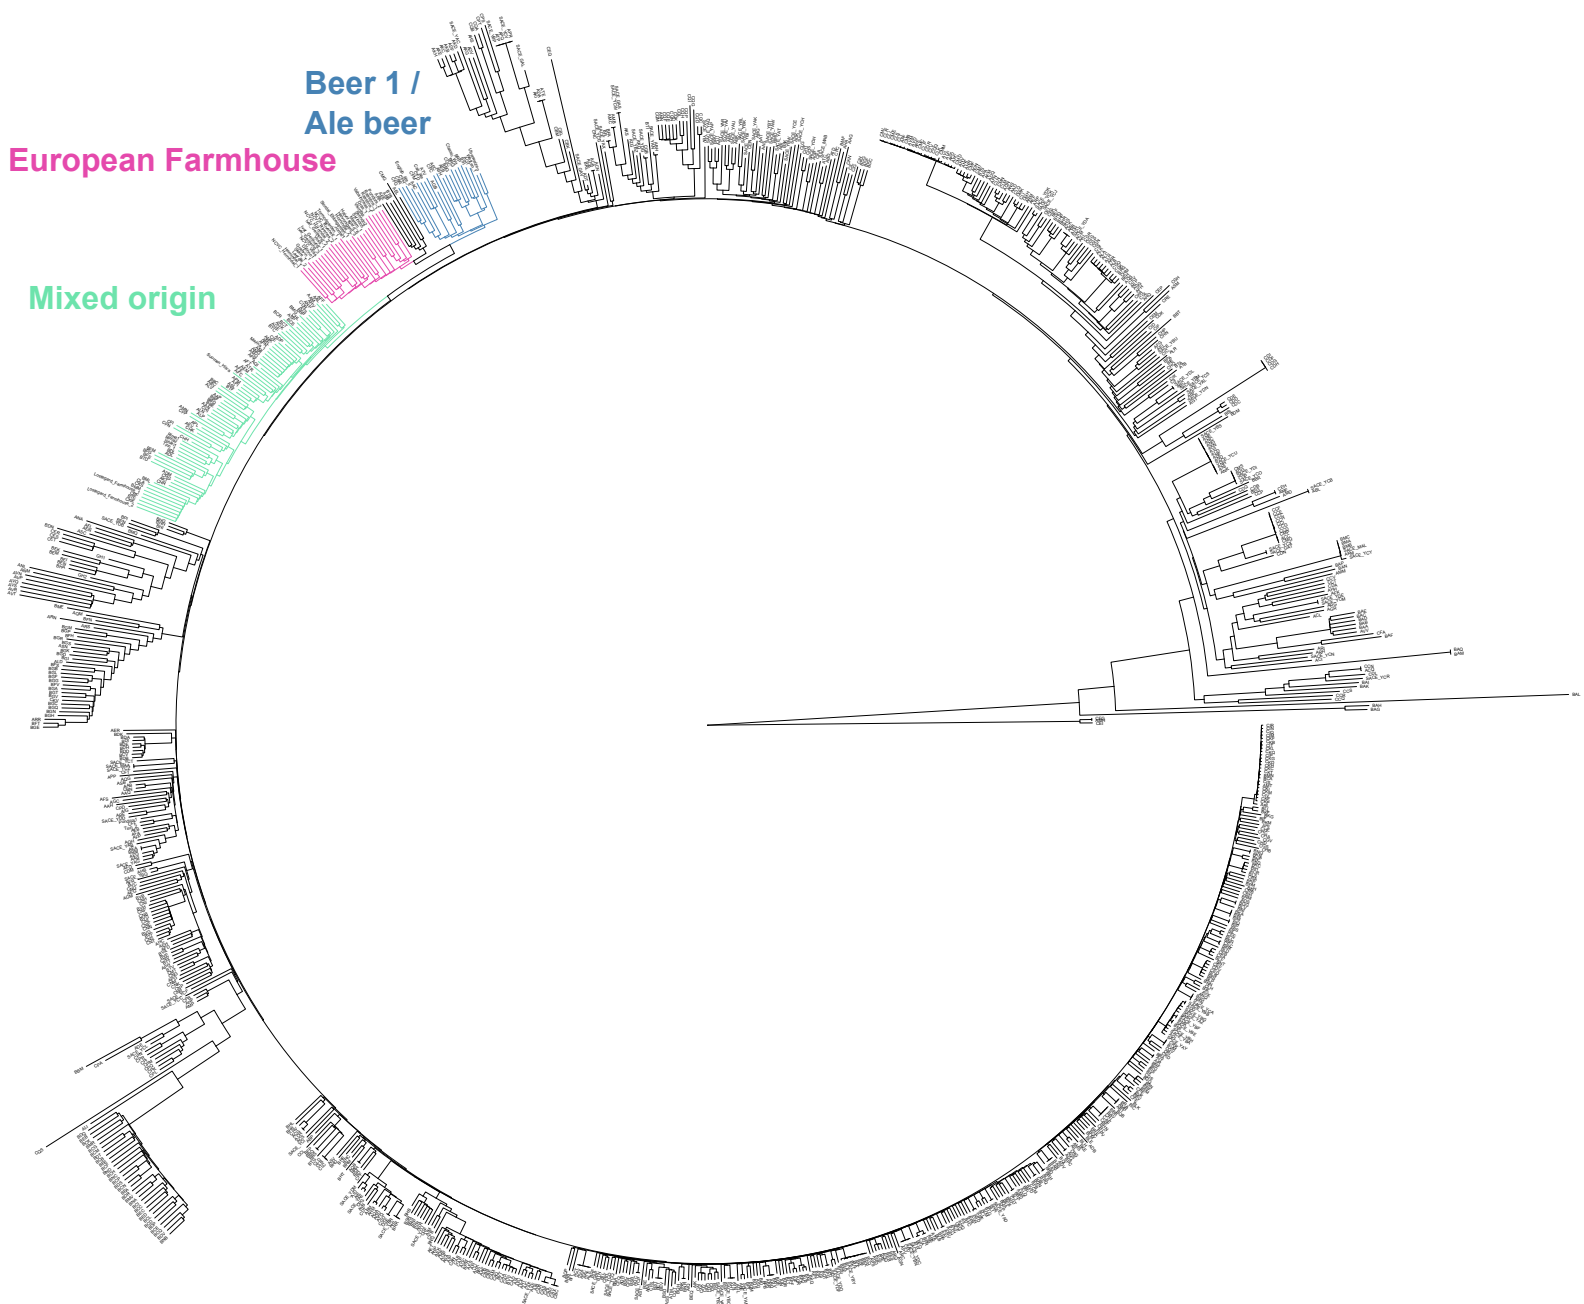

# Supplementary Figure S6

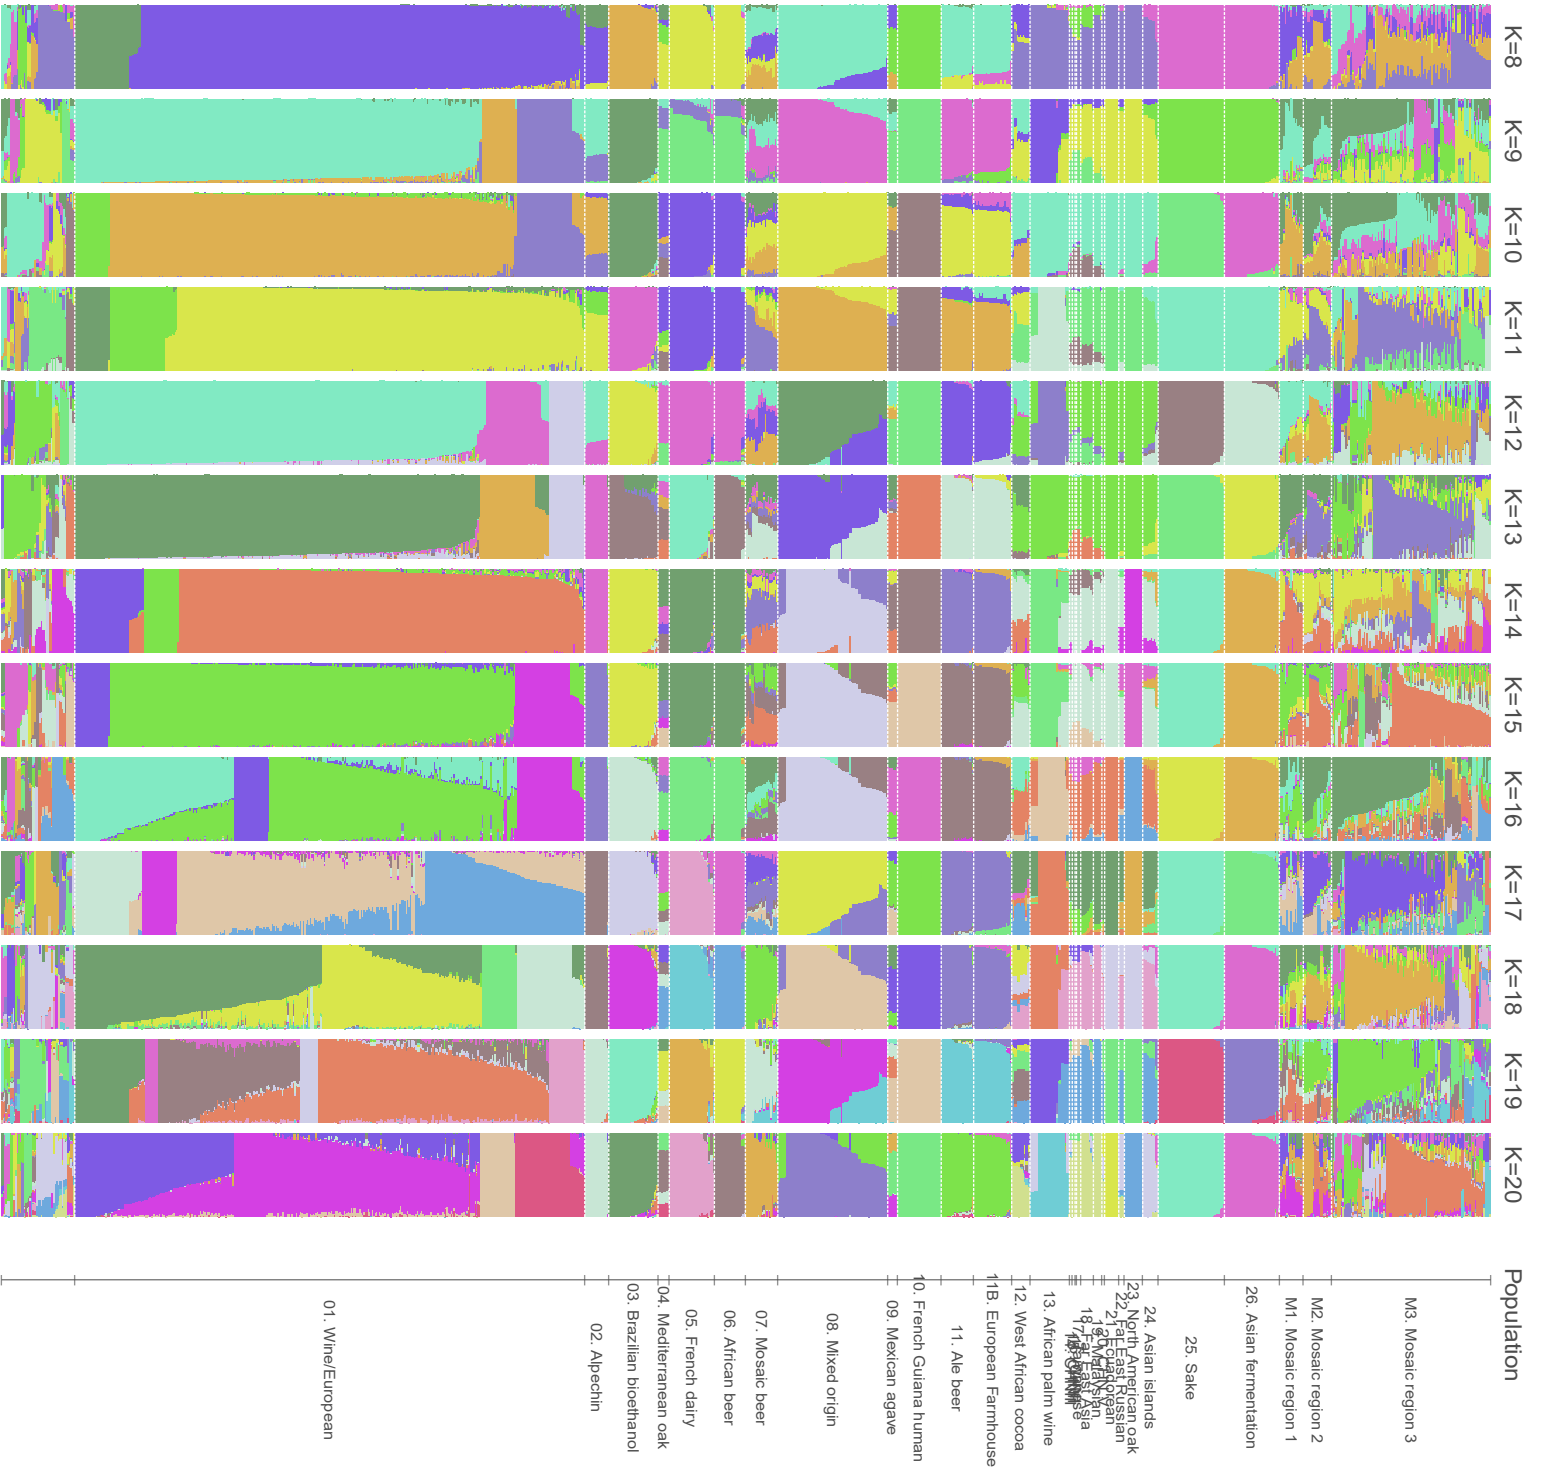

# Supplementary Figure S7

**A**

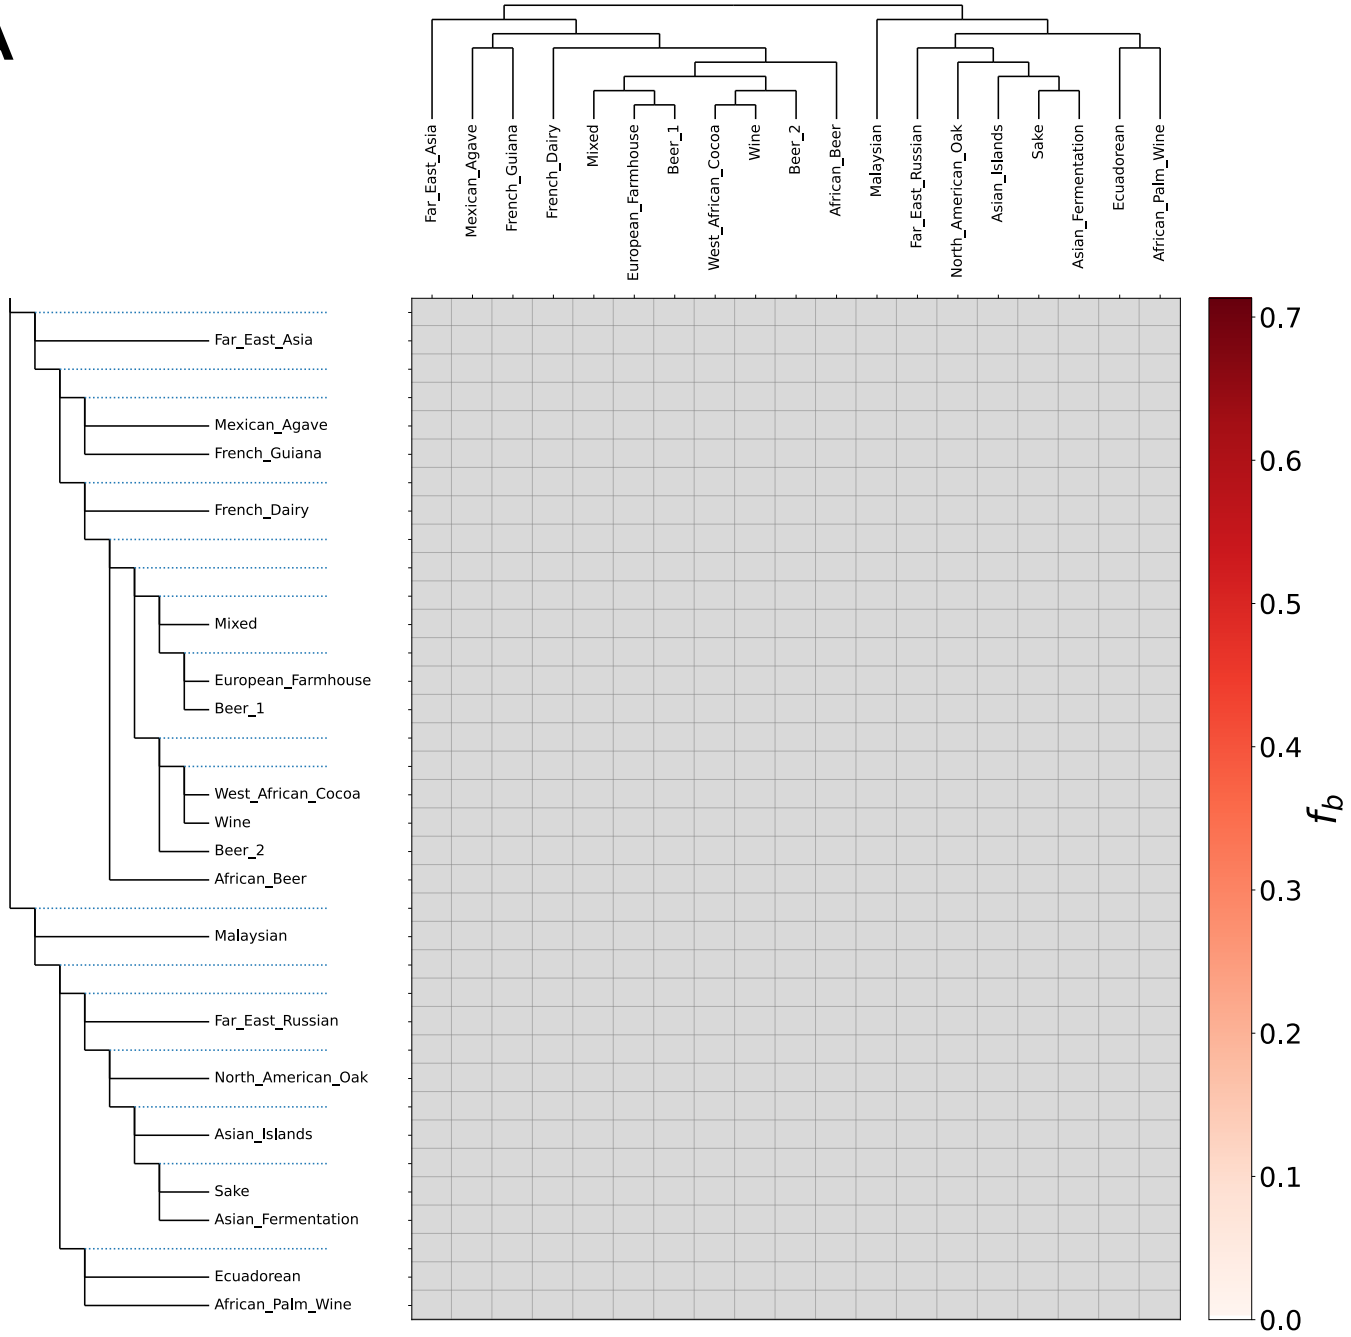

**B**

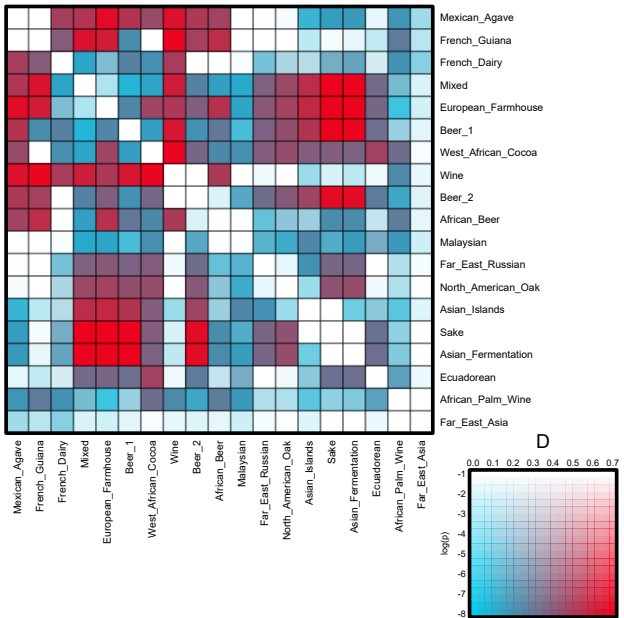

**C**

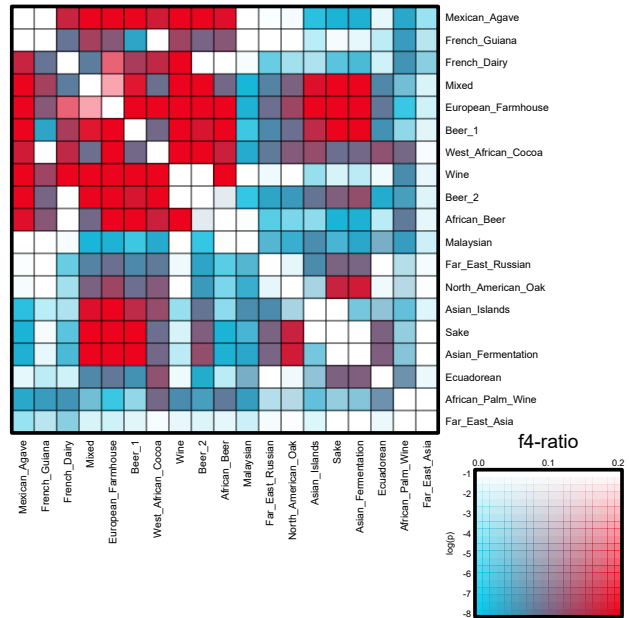

**D**

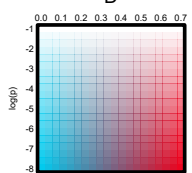

**f4-ratio**

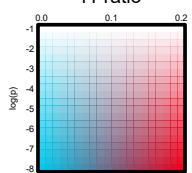

# Supplementary Figure S8

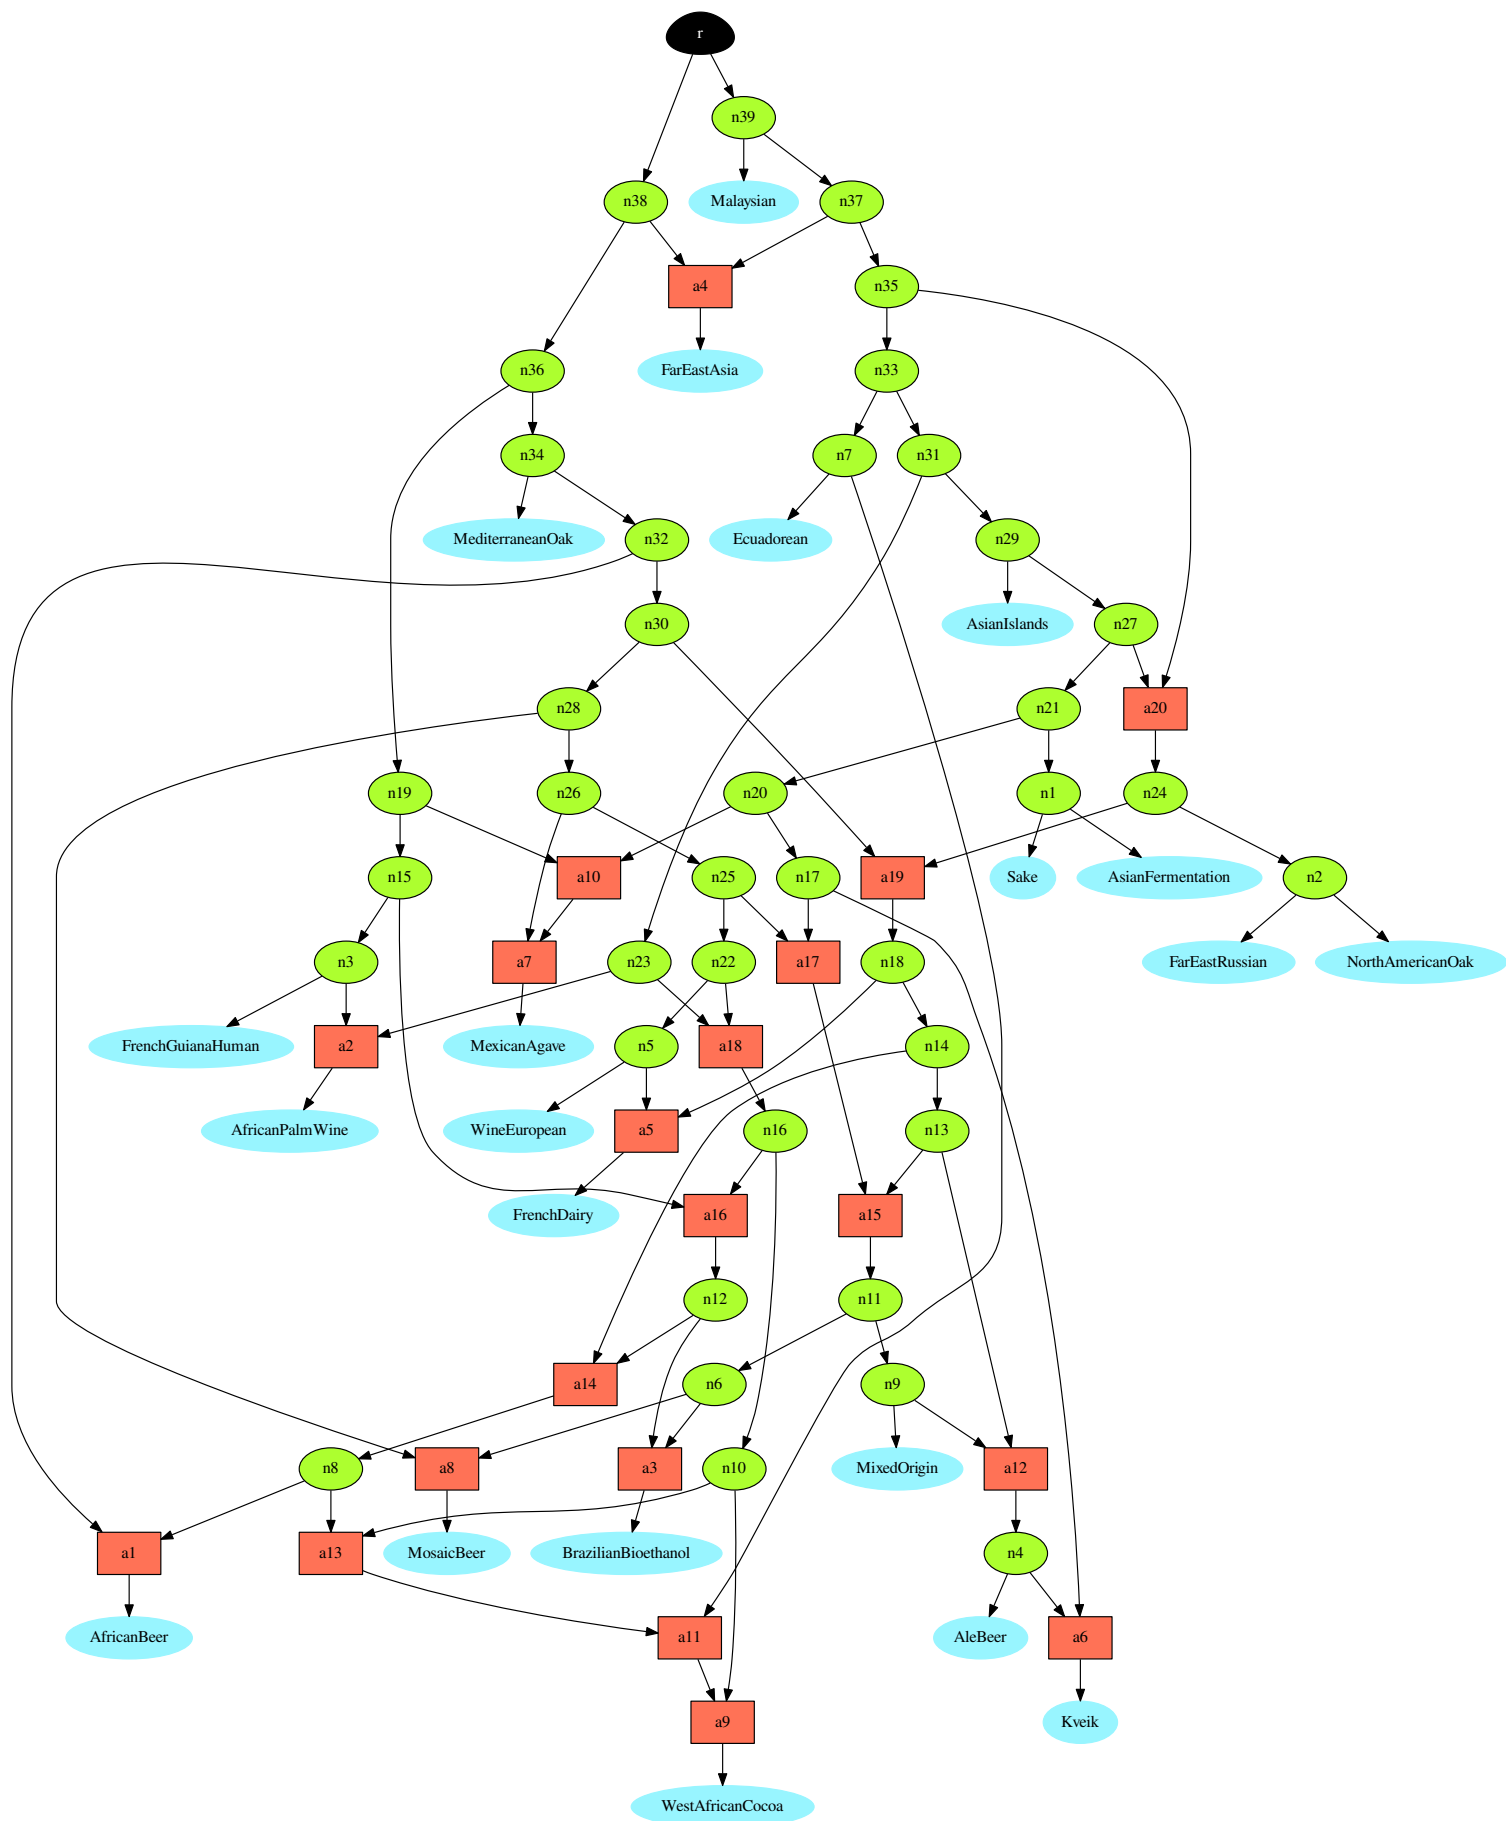

# Supplementary Figure S9

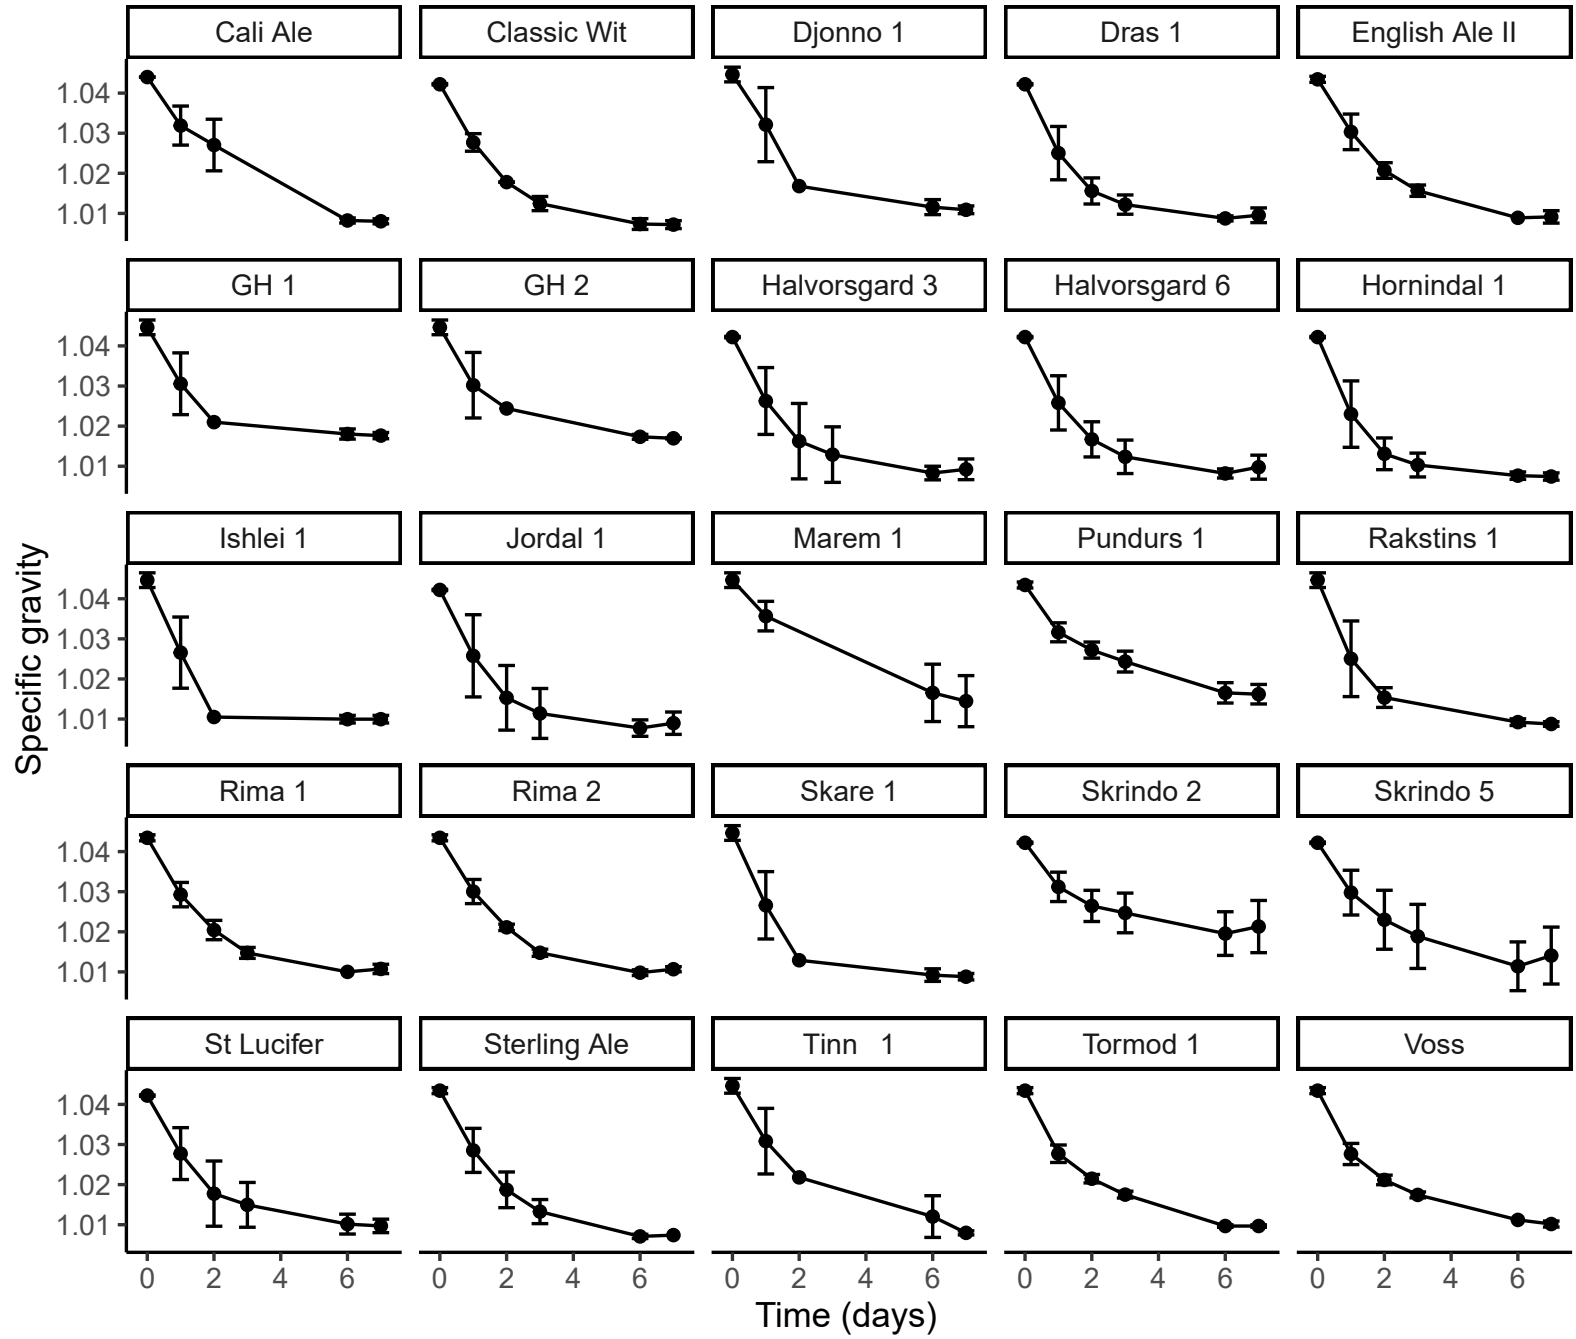

# Supplementary Figure S10

## Isoamyl acetate

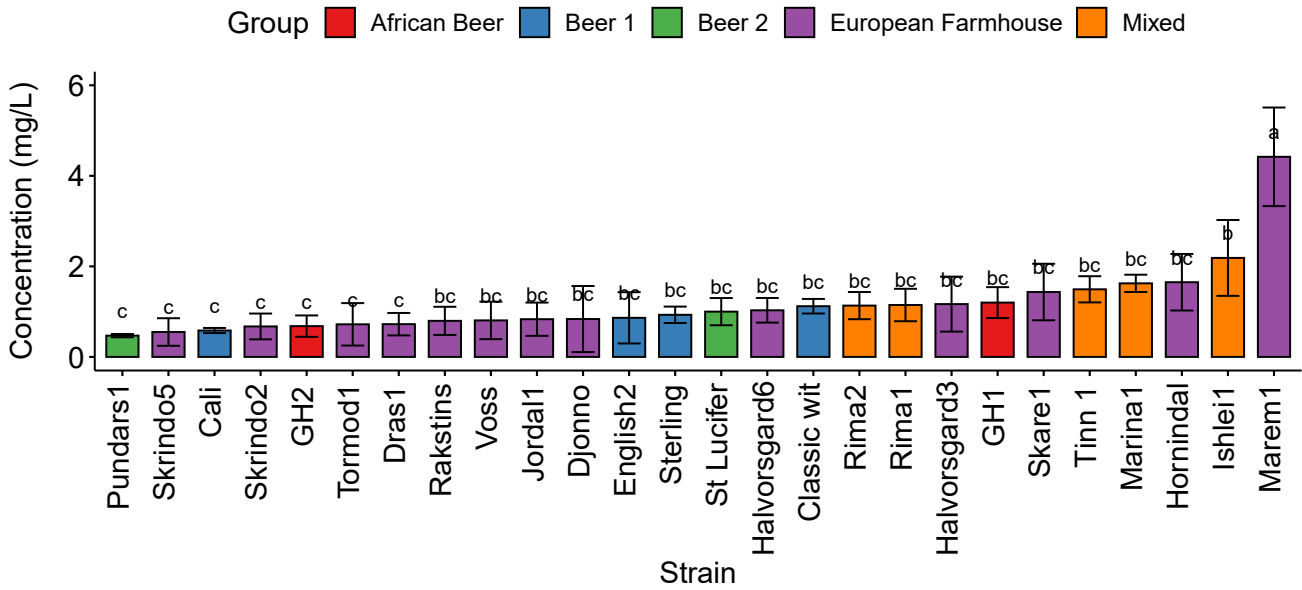

## Isobutyl acetate

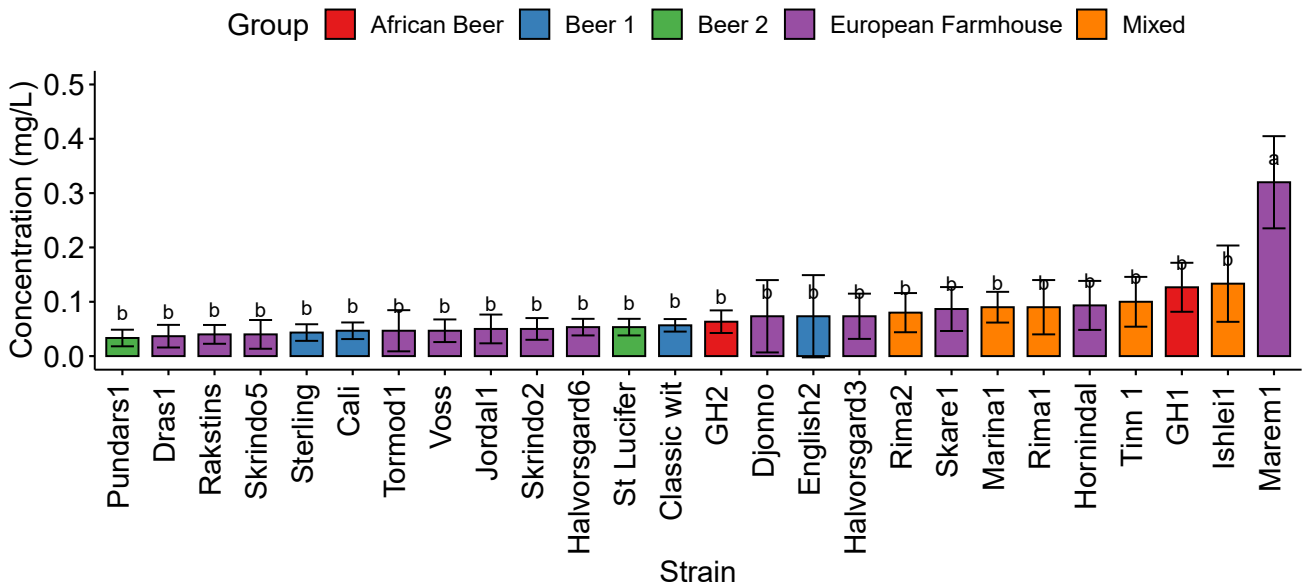

## Phenylethyl acetate

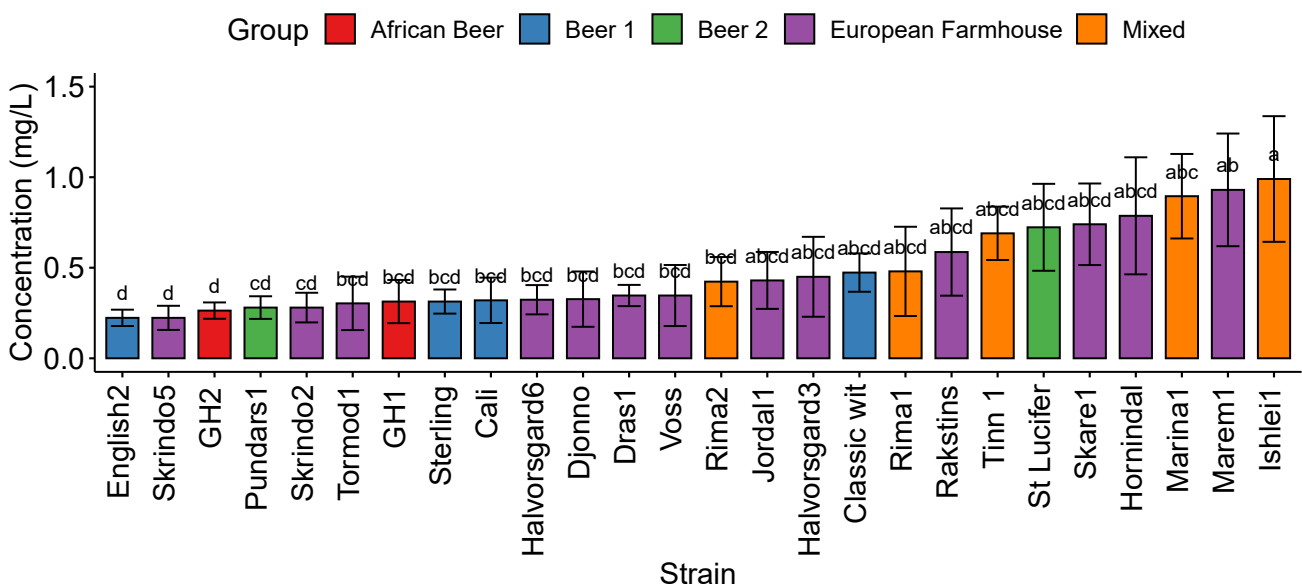



Supplementary Figure S11

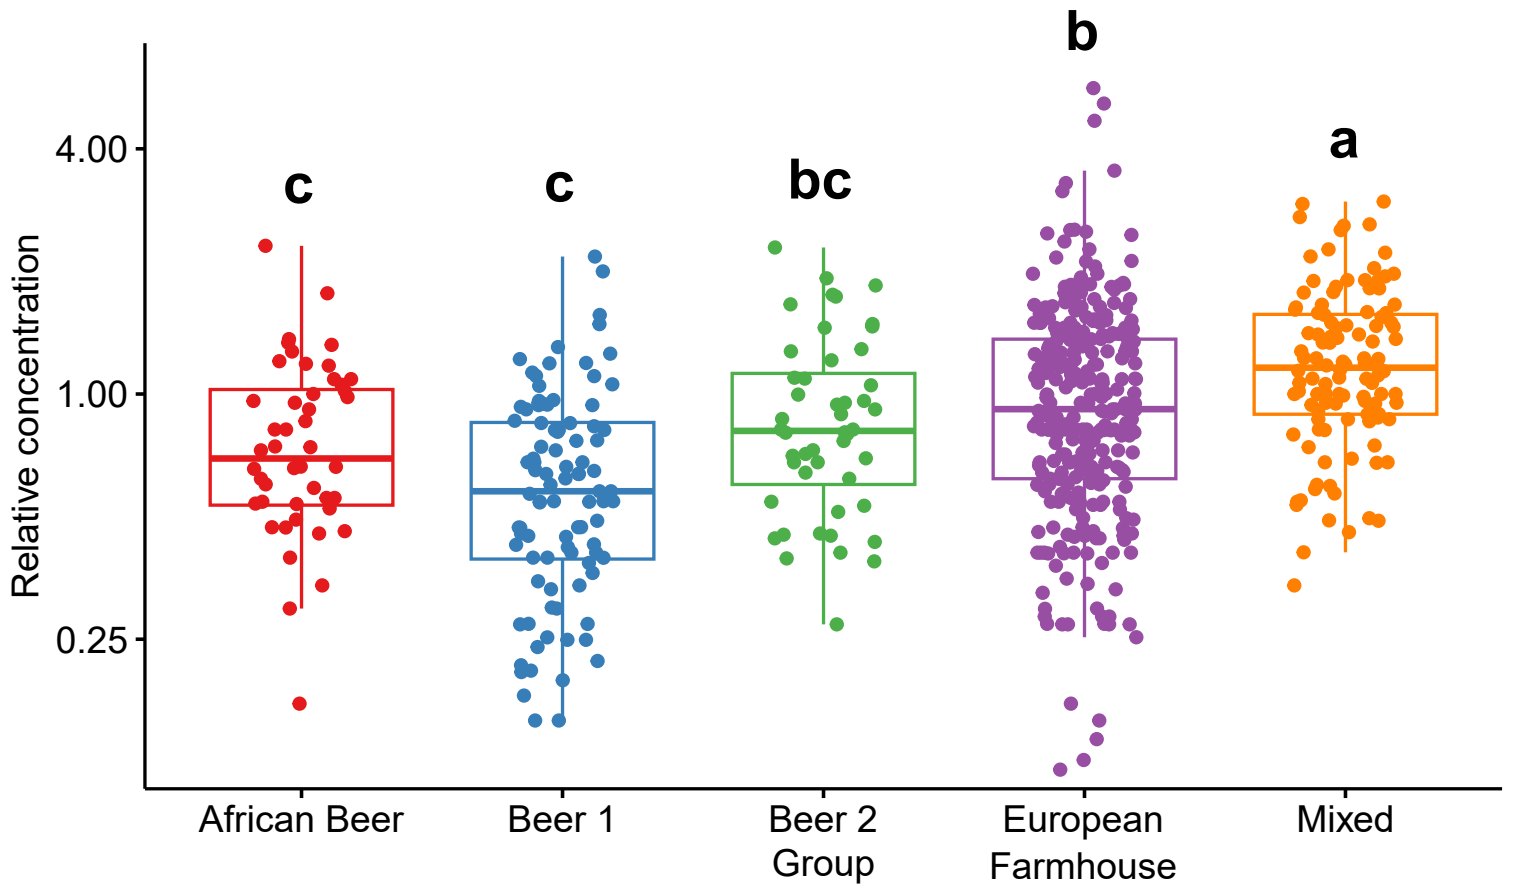

# Supplementary Figure S12

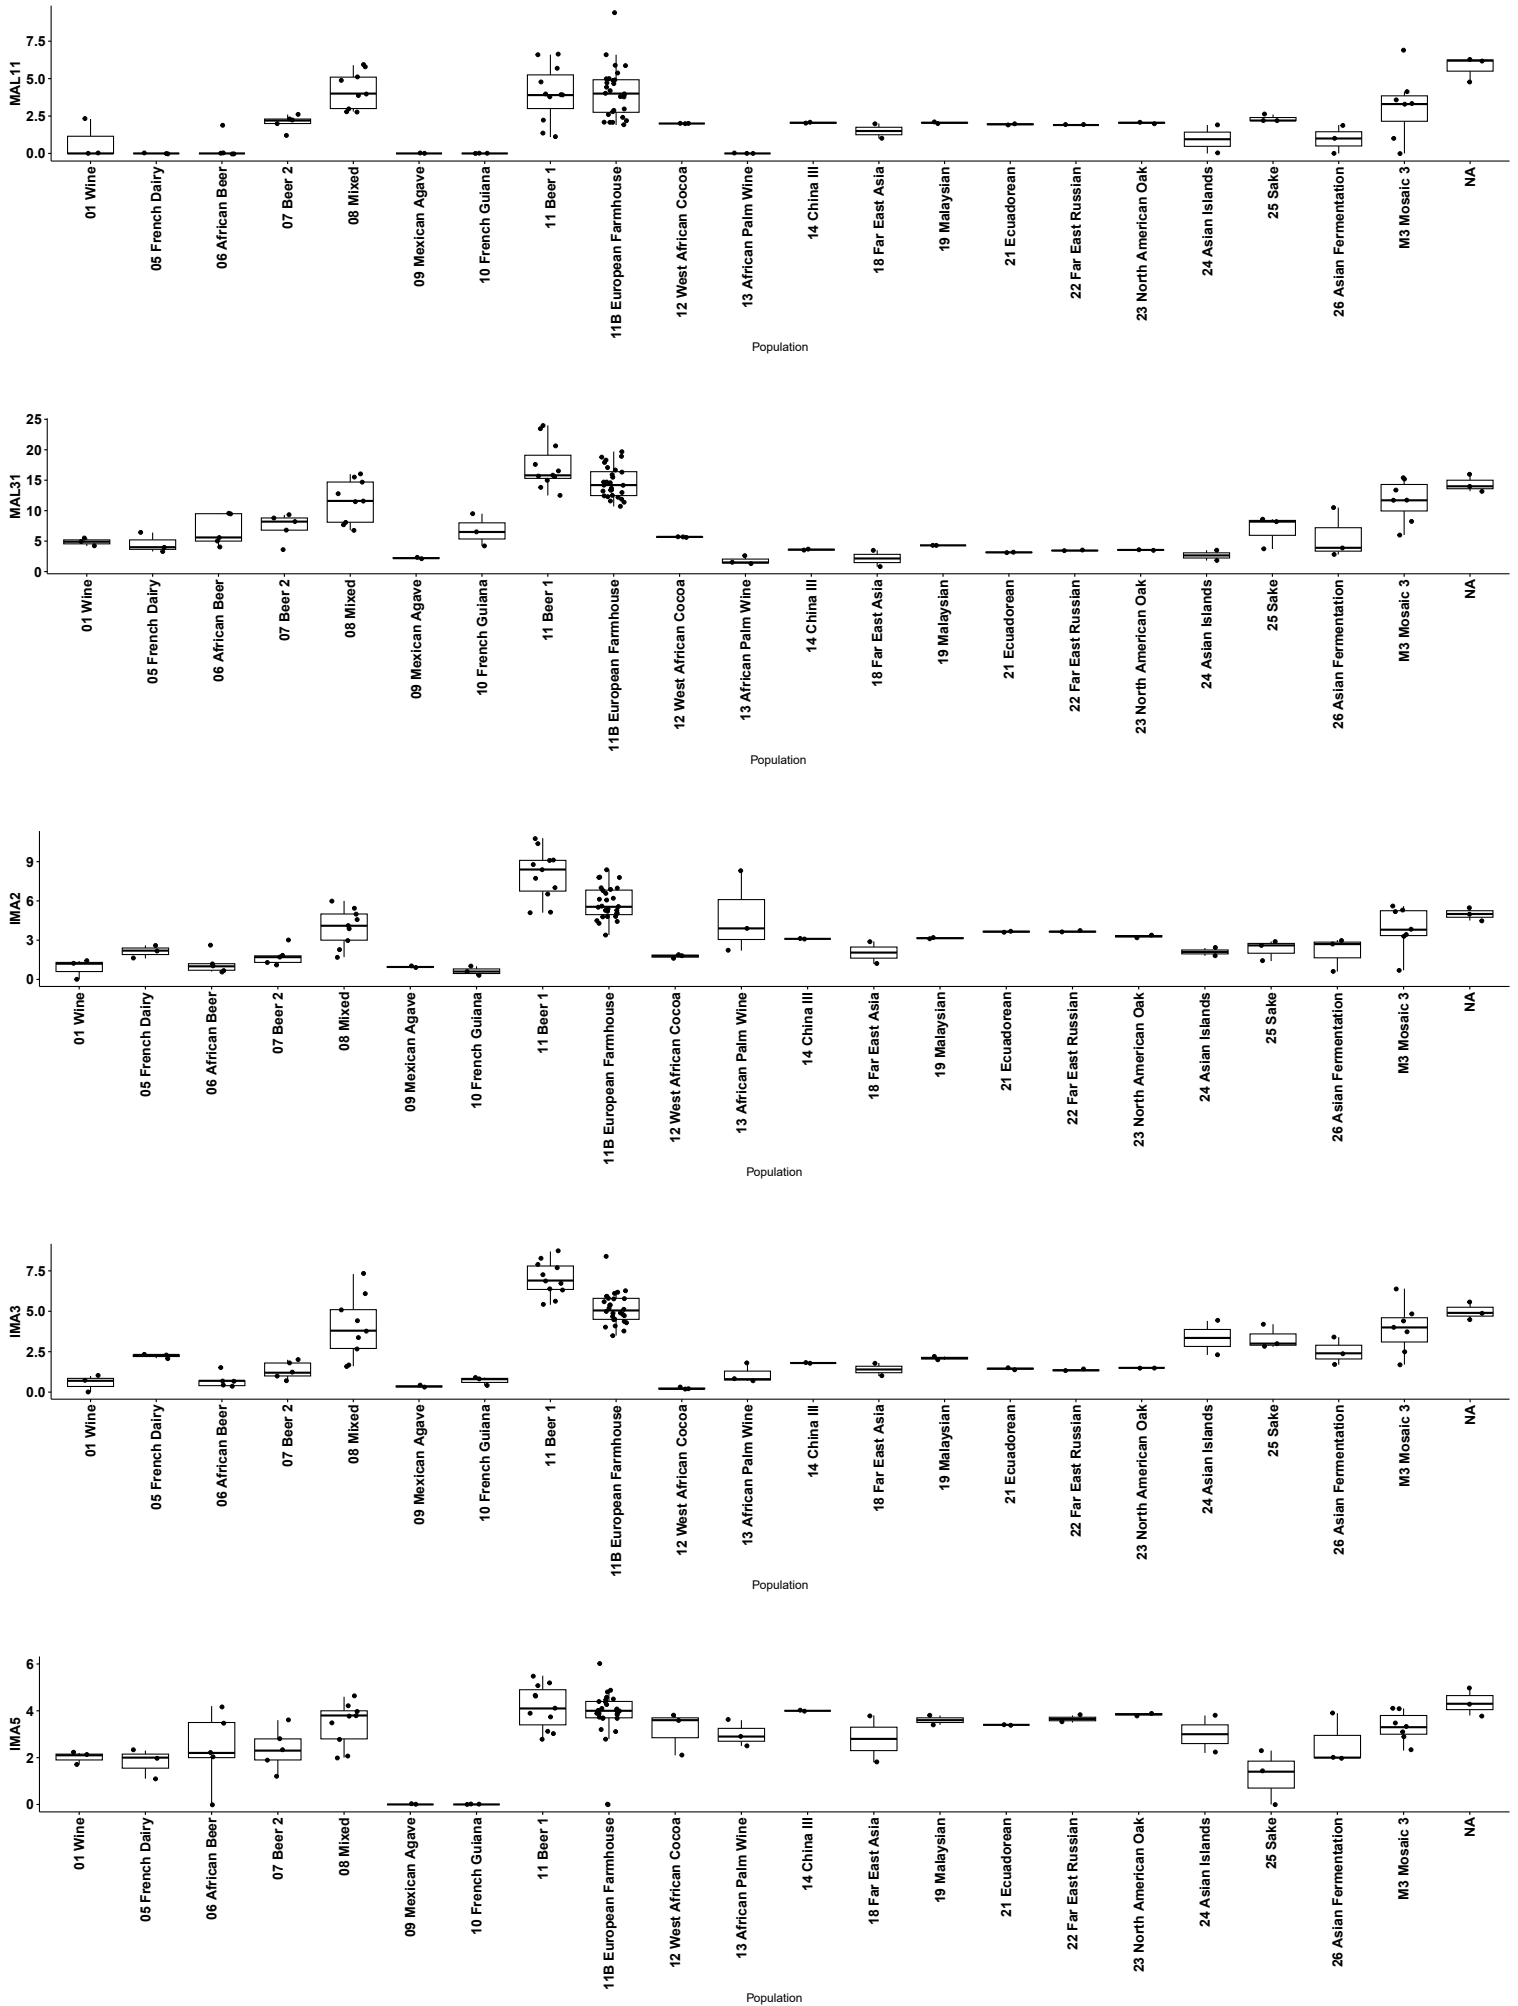

# Supplementary Figure S13

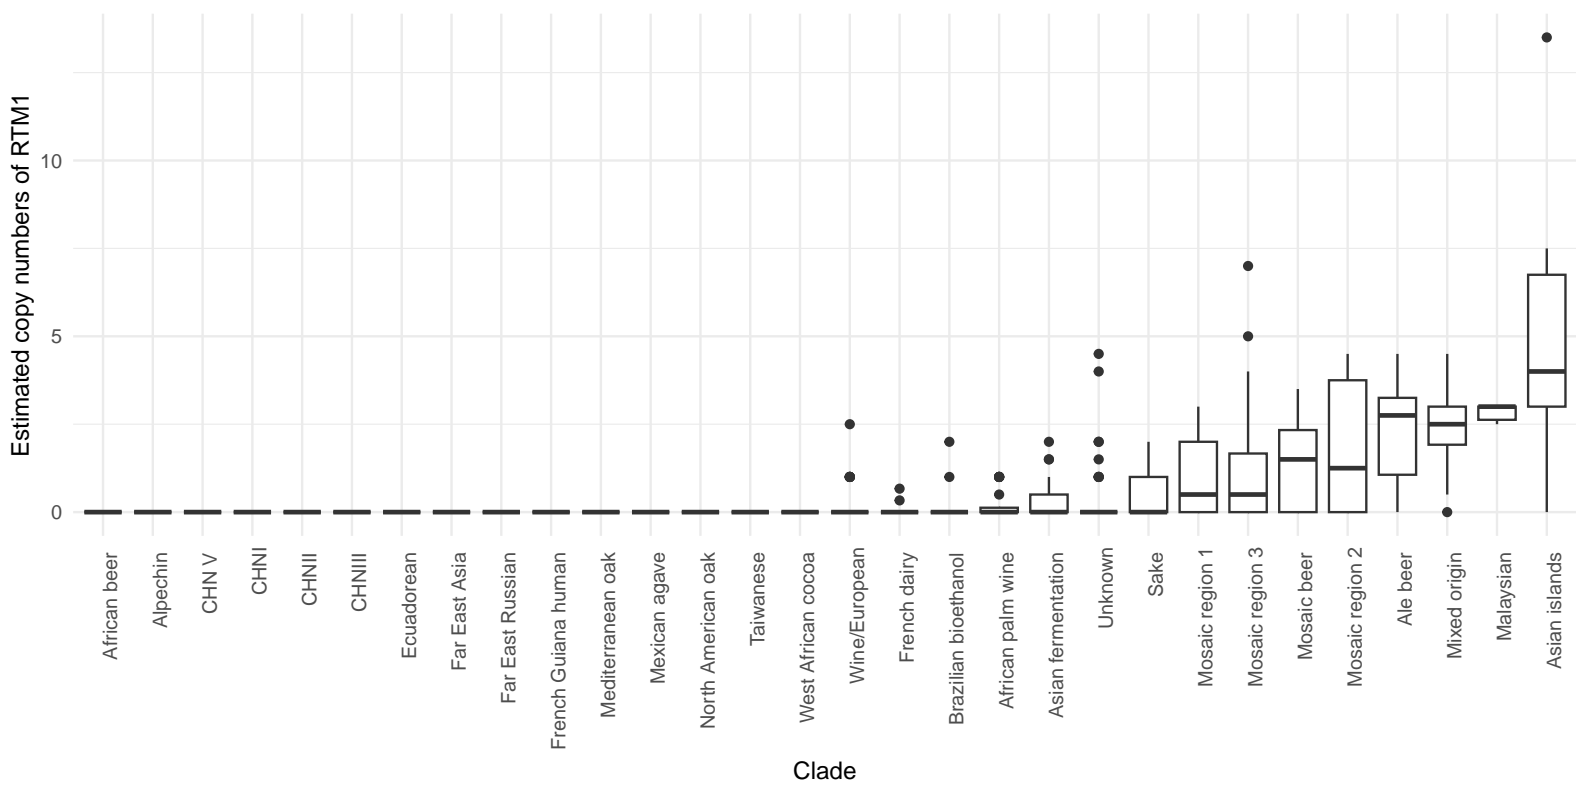

# Supplementary Figure S14

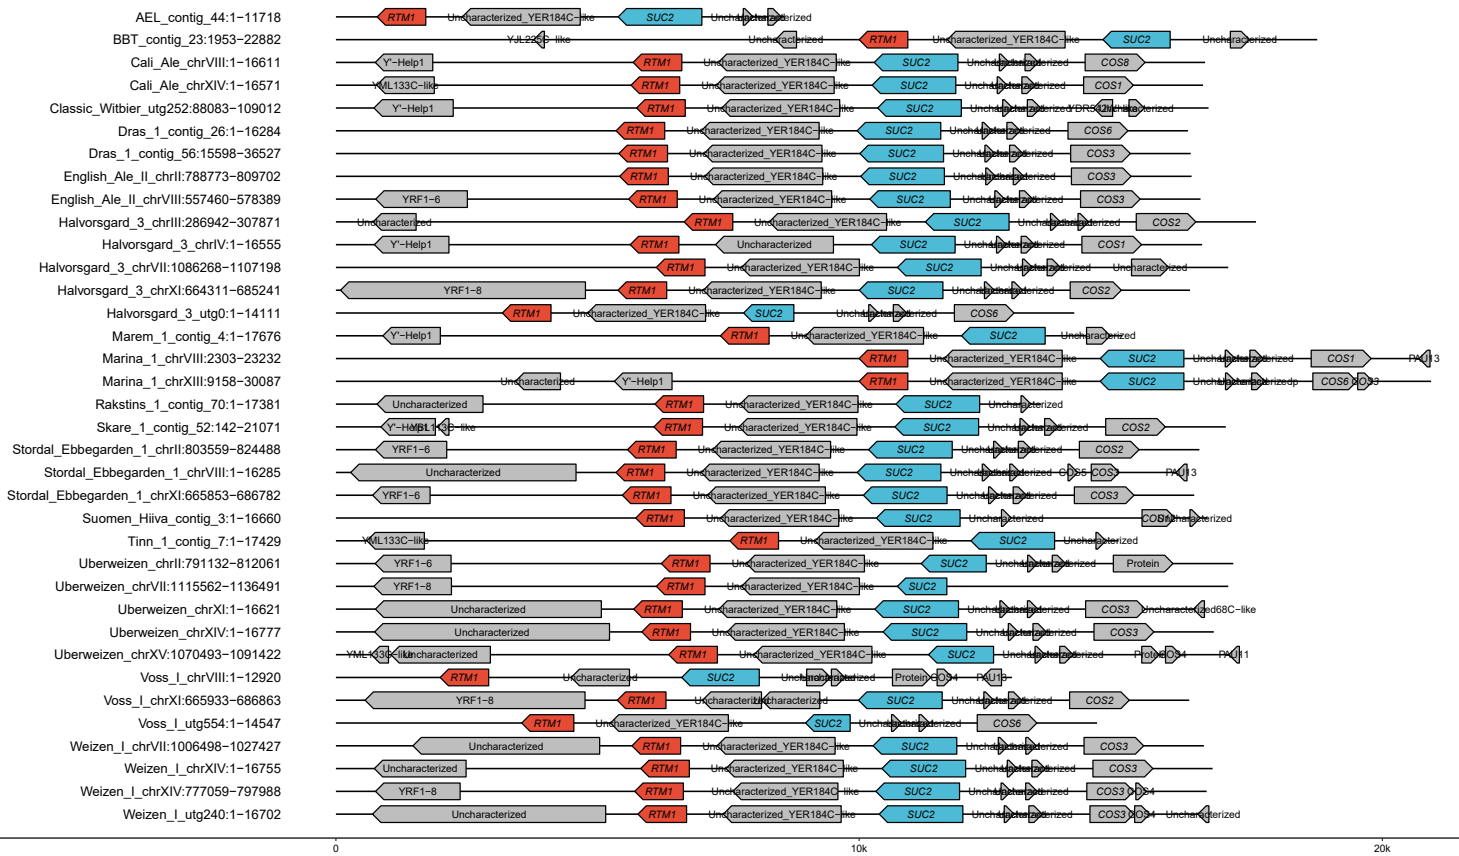

Supplement: MOESM1 [file 253_2024_13267_MOESM1_ESM.pdf]
